# Supplementary material for: Chiral cyclopropenimine-catalyzed enantioselective Michael additions between benzophenone-imine of glycine esters and α,β-unsaturated pyrazolamides
Source: Royal Society of Chemistry journal article supplement (doi:10.1039/d3nj02537c), 2023-01-01
Supplement: d3nj02537c1.pdf [file d3nj02537c1.pdf]

## Supplementary Information

### Chiral cyclopropenimine-catalyzed enantioselective Michael additions between benzophenone-imine of glycine esters and $\alpha,\beta$ -unsaturated pyrazolamides

Yu-Jun Bai,<sup>†,a,b</sup> Xue-Ying Wang,<sup>†,a</sup> Si-Kai Zhu,<sup>a</sup> Xiao-Hui Zheng,<sup>\*b</sup> Sheng-Yong Zhang,<sup>\*a</sup> and Ping-An Wang<sup>\*a</sup>

<sup>a</sup>Department of Medicinal Chemistry and Pharmaceutics Analysis, School of Pharmacy, Air Force Military Medical University, Xi'an 710032, P. R. China.

<sup>b</sup>Key Laboratory of Resource Biology and Biotechnology in Western China, Ministry of Education, The College of Life Sciences, Northwest University, Xi'an 710069, P. R. China.

<sup>†</sup> These authors contributed equally to this work.

\*Corresponding Authors: (emails: [syzhang@fmmu.edu.cn](mailto:syzhang@fmmu.edu.cn); [zhengxh@nwu.edu.cn](mailto:zhengxh@nwu.edu.cn); [ping\\_an1718@outlook.com](mailto:ping_an1718@outlook.com))

## Table of Contents

|                                                                                 |      |
|---------------------------------------------------------------------------------|------|
| <b>1. General</b> .....                                                         | S3   |
| <b>2. Experimental sections</b> .....                                           | S3   |
| 2.1 General procedure for CSB-1 catalyzed asymmetric Michael additions.....     | S3   |
| 2.2 General procedure for acidic hydrolysis and <i>in-situ</i> lactamation..... | S11  |
| <b>3. X-ray single crystal diffraction analysis data</b> .....                  | S14  |
| <b>4. NMR spectra for new compounds</b> .....                                   | S16  |
| <b>5. NOESY copies</b> .....                                                    | S55  |
| <b>6. HRMS scanning copies</b> .....                                            | S57  |
| <b>7. HPLC charts</b> .....                                                     | S88  |
| <b>8. Reference</b> .....                                                       | S119 |

## 1. General

The  $^1\text{H}$  NMR,  $^{13}\text{C}$  NMR,  $^{19}\text{F}$  NMR spectra were measured in  $\text{CDCl}_3$ , Acetone- $d_6$  or DMSO- $d_6$  solution on a Bruker AV-400 spectrometer using TMS as an internal reference. Coupling constant ( $J$ ) values are given in Hz. Multiplicities are designated by the following abbreviations: s, singlet; d, doublet; t, triplet; q, quartet; br, broad; m, multiplet. High-resolution mass spectra (HRMS) were performed on a Bruker microTOF-Q II Mass Spectrometer with ES ionization (ESI). All commercially available reagents were used as received. Thin-layer chromatography on silica (with  $\text{GF}_{254}$ ) was used to monitor all reactions. Products were purified by flash column chromatography on silica gel purchased from Qingdao Haiyang Chemical Co., Ltd. Chiral High Performance Liquid Chromatography (HPLC) analyses were performed using an Agilent 1260 Series apparatus and Chiralpak AD-H, OD-H and AS-H columns purchased from Daicel Chemical Industries. The configurations of the products have been assigned by single crystal X-ray diffraction analysis. All solvents, organic and inorganic reagents were from commercial sources and used without purification unless otherwise noted. Glycine esters **1a** and **1b**,  $\beta$ -substituted  $\alpha,\beta$ -unsaturated pyrazolamides **2** were prepared according to literatures reported methods.<sup>[1,2]</sup> Chiral cyclopropenimine organosuperbsaes (CSBs) **CSB-1**, *ent*-**CSB-1**, **CSB-2**, **CSB-3**, **CSB-5**, *ent*-**CSB-5** were prepared following literature reported procedure, and their characterization data are consistent with reference report.<sup>[3]</sup> The synthesis of **CSB-4**, **CSB-6** and **CSB-8** were described in our previous report<sup>[4]</sup>. The characterization data of all new compounds were listed in the Supplementary Information.

## 2. Experimental sections

### 2.1 General procedure for CSB-1 catalyzed asymmetric Michael additions

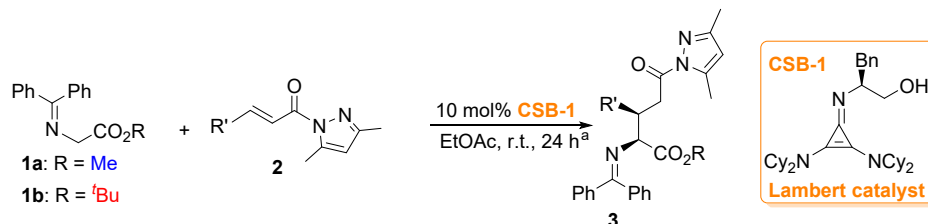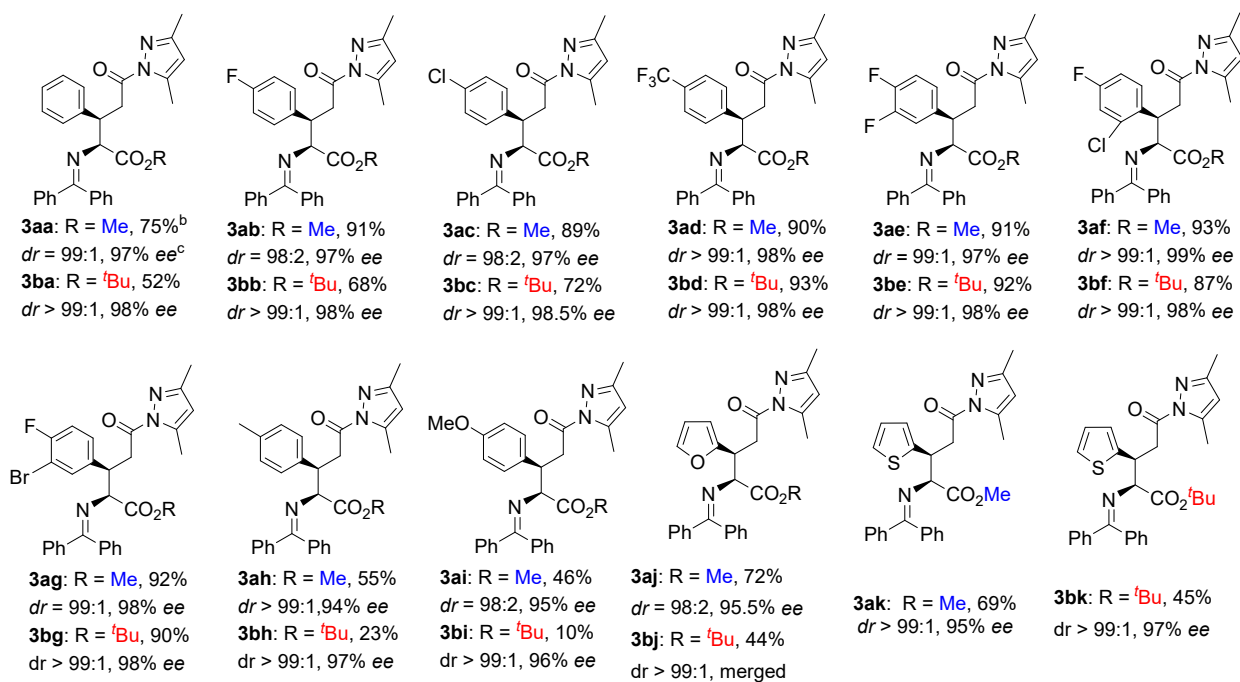

a. All reactions were performed in 1.0 mmol scale; b. Isolated yield based on **2**; c. The *dr* and *ee* of products were determined by chiral HPLC column (Daicel ChiralPak AD-H).

Glycine imine **1** (1.0 mmol),  $\beta$ -substituted  $\alpha,\beta$ -unsaturated pyrazolamides **2** (1.1 mmol, 1.1 equiv.), and **CSB-1** (56.0 mg, 10 mol%) in 10.0 mL of anhydrous EtOAc were stirred at r.t. for 24 h. The reaction was checked by a thin layer chromatography (TLC). The solvent was removed by a rotary evaporator and the residue was purified by a flash column chromatography (*n*-hexane: EtOAc: Et<sub>3</sub>N = 10:1:0.01 to 1:1:0.01, V/V. Note: The silica gel which used in purification was buffered by *n*-hexane and Et<sub>3</sub>N (V/V = 100/1). The *dr* and *ee* values of adducts **3** were determined by chiral HPLC analysis.

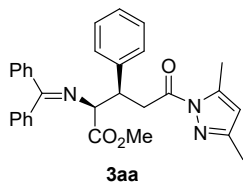

White solid; 75% yield;  $[\alpha]_{\text{D}}^{25} = -75.4^\circ$  ( $c = 0.1$ , CH<sub>2</sub>Cl<sub>2</sub>), m.p. 37.2-38.4 °C. <sup>1</sup>H NMR (400 MHz, Acetone-*d*<sub>6</sub>)  $\delta$  (ppm) 7.59 (d,  $J = 7.2$  Hz, 2H), 7.45-7.35 (m, 6H), 7.23-7.16 (m, 5H), 6.85 (d,  $J = 5.2$  Hz, 2H), 5.95 (s, 1H), 4.29 (d,  $J = 6.0$  Hz, 1H), 4.23 (q,  $J = 6.8$  Hz, 1H), 3.80-3.75 (m, 2H), 3.56 (s, 3H), 2.36 (s, 3H), 2.18 (s, 3H); <sup>13</sup>C NMR (101 MHz, Acetone-*d*<sub>6</sub>)  $\delta$  (ppm) 172.83, 172.06, 171.51, 152.16, 144.34, 142.55, 140.13, 136.97, 131.39, 129.45, 129.28, 129.10, 128.89, 128.39, 127.60, 111.65, 71.49, 52.14, 45.69, 37.31, 14.46, 13.81; HRMS (ESI): Exact mass calcd. for C<sub>30</sub>H<sub>30</sub>N<sub>3</sub>O<sub>3</sub><sup>+</sup> [M+H]<sup>+</sup>, 480.2282, Found 480.2285; HPLC: ChiralPak AD-H, *n*-hex/*i*-PrOH = 98:2, 0.8 mL/min, 254 nm,  $t_{\text{R}}$ (major) = 26.818 min,  $t_{\text{R}}$ (minor) = 43.017 min, major: 97% *ee*.

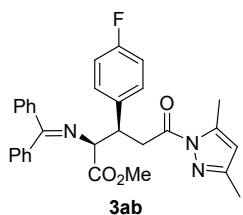

White solid; 91% yield;  $[\alpha]_{\text{D}}^{25} = -150.1^\circ$  ( $c = 0.1$ , CH<sub>2</sub>Cl<sub>2</sub>), m.p. 51.9-52.7 °C. <sup>1</sup>H NMR (400 MHz, Acetone-*d*<sub>6</sub>)  $\delta$  (ppm) 7.60 (d,  $J = 7.2$  Hz, 2H), 7.45-7.42 (m, 5H), 6.93-6.92 (m, 2H), 5.96 (s, 1H), 4.27 (d,  $J = 6.4$  Hz, 1H), 4.22 (q,  $J = 6.8$  Hz, 1H), 3.74 (d,  $J = 6.8$  Hz, 2H), 3.56 (s, 3H), 2.36 (s, 3H), 2.18 (s, 3H); <sup>13</sup>C NMR (101 MHz, Acetone-*d*<sub>6</sub>)  $\delta$  (ppm) 172.71, 172.24, 171.42, 163.79, 161.37, 152.24, 144.37, 140.09, 138.54, 138.51, 136.92, 131.46, 131.10, 131.02, 129.54, 129.47, 129.35, 128.92, 128.37, 115.78, 115.57, 111.70, 71.39, 52.18, 45.04, 37.54, 14.44, 13.80; <sup>19</sup>F NMR (376 MHz, Acetone-*d*<sub>6</sub>)  $\delta$  (ppm) 59.88; HRMS (ESI): Exact mass calcd. for C<sub>30</sub>H<sub>29</sub>FN<sub>3</sub>O<sub>3</sub><sup>+</sup> [M+H]<sup>+</sup>, 498.2187, Found 498.2192; HPLC: ChiralPak AD-H, *n*-hex/*i*-PrOH = 90:10, 1.0 mL/min, 254 nm,  $t_{\text{R}}$ (major) = 7.707 min,  $t_{\text{R}}$ (minor) = 12.670 min, major: 97% *ee*.

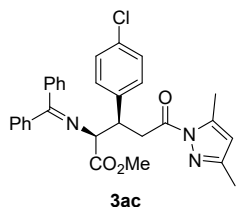

White solid; 89% yield;  $[\alpha]_{\text{D}}^{25} = -53.2^\circ$  ( $c = 0.1$ , CH<sub>2</sub>Cl<sub>2</sub>), m.p. 44.5-45.6 °C. <sup>1</sup>H NMR (400 MHz, Acetone-*d*<sub>6</sub>)  $\delta$  (ppm) 7.60 (d,  $J = 7.6$  Hz, 2H), 7.45-7.42 (m, 4H), 7.36 (d,  $J = 7.6$  Hz, 2H), 7.22 (dd,  $J = 8.4$  Hz,  $J = 20.0$  Hz, 4H), 6.93 (d,  $J = 7.6$  Hz, 2H), 5.96 (s, 1H), 4.28 (d,  $J = 6.0$  Hz, 1H), 4.20 (q,  $J = 6.8$  Hz, 1H), 3.75 (d,  $J = 7.2$  Hz, 1H), 3.57 (s, 3H), 2.37 (s, 3H), 2.18 (s, 3H); <sup>13</sup>C NMR (101 MHz, Acetone-*d*<sub>6</sub>)  $\delta$  (ppm) 172.65, 172.34, 171.35, 152.28, 144.39, 141.45, 140.08, 136.88, 132.92, 131.47, 131.02, 129.55, 129.48, 129.35, 129.07, 128.92, 128.38, 111.72,

71.18, 52.21, 45.18, 37.34, 14.41, 13.78; HRMS (ESI): Exact mass calcd. for  $C_{30}H_{29}ClN_3O_3^+$   $[M+H]^+$ , 514.1892. Found 514.1895; HPLC: ChiralPak AD-H, *n*-hex/*i*-PrOH = 90:10, 1.0 mL/min, 254 nm,  $t_R$ (major) = 8.049 min,  $t_R$ (minor) = 13.203 min, major: 97% *ee*.

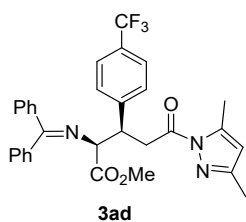

White solid; 90% yield;  $[\alpha]_D^{25} = -40.3^\circ$  ( $c = 0.1$ ,  $CH_2Cl_2$ ), m.p. 42.7-43.8 °C.  $^1H$  NMR (400 MHz, Acetone- $d_6$ )  $\delta$  (ppm) 7.59 (dd,  $J_1 = 10.1$  Hz,  $J_2 = 8.5$  Hz, 4H), 7.47-7.36 (m, 8H), 6.86 (d,  $J = 6.6$  Hz, 2H), 5.98 (s, 1H), 4.30 (dt,  $J_1 = 13.8$  Hz,  $J_2 = 5.7$  Hz, 2H), 3.85 (ddd,  $J_1 = 17.5$  Hz,  $J_2 = 6.7$  Hz, 2H), 3.59 (s, 3H), 2.37 (s, 3H), 2.19 (s, 3H);  $^{13}C$  NMR (101 MHz, Acetone- $d_6$ )  $\delta$  (ppm) 172.60, 172.49, 171.28, 152.39, 147.31, 144.43, 140.02, 136.75, 131.54, 130.07, 129.58, 129.51, 129.33, 128.95, 128.29, 125.97, 125.93, 111.77, 70.93, 52.33, 45.51, 36.97, 14.42, 13.81;  $^{19}F$  NMR (376 MHz, Acetone  $d_6$ )  $\delta$  (ppm) 114.62; HRMS (ESI): Exact mass calcd. for  $C_{31}H_{29}F_3N_3O_3^+$   $[M+H]^+$ , 548.2156. Found 548.2158; HPLC: ChiralPak AD-H, *n*-hex/*i*-PrOH = 90:10, 1.0 mL/min, 254 nm,  $t_R$ (major) = 7.108 min,  $t_R$ (minor) = 13.529 min, 97% *ee*.

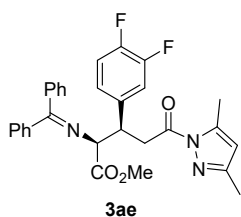

White solid; 91% yield;  $[\alpha]_D^{25} = -53.0^\circ$  ( $c = 0.1$ ,  $CH_2Cl_2$ ), m.p. 106.7-107.8 °C.  $^1H$  NMR (400 MHz, Acetone- $d_6$ )  $\delta$  (ppm) 7.64 (s, 1H), 7.62 (s, 1H), 7.49-7.45 (m, 4H), 7.39 (t,  $J = 7.4$  Hz, 2H), 7.23-7.16 (m, 2H), 7.07-7.04 (m, 1H), 6.98-6.96 (m, 2H), 6.00 (s, 1H), 4.31 (d,  $J = 5.9$  Hz, 1H), 4.23-4.18 (m, 1H), 3.80 (ddd,  $J_1 = 17.3$  Hz,  $J_2 = 7.2$  Hz, 2H), 3.61 (s, 3H), 2.39 (s, 3H), 2.20 (s, 3H);  $^{13}C$  NMR (101 MHz, Acetone- $d_6$ )  $\delta$  (ppm) 172.57, 172.51, 171.28, 152.36, 144.42, 140.01, 136.83, 131.55, 129.63, 129.50, 129.40, 128.96, 128.34, 125.81, 125.77, 125.74, 118.36, 118.19, 117.88, 117.71, 111.77, 70.98, 52.30, 45.02, 37.31, 14.43, 13.80;  $^{19}F$  NMR (376 MHz, Acetone- $d_6$ )  $\delta$  (ppm) 37.23, 37.18, 34.74, 34.68; HRMS (ESI): Exact mass calcd. for  $C_{30}H_{28}F_2N_3O_3^+$   $[M+H]^+$ , 516.2093. Found 514.2098; HPLC: ChiralPak AD-H, *n*-hex/*i*-PrOH = 95:5, 1.0 mL/min, 254 nm,  $t_R$ (major) = 7.005 min,  $t_R$ (minor) = 12.474 min, 97% *ee*.

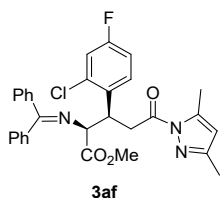

White solid; 93% yield;  $[\alpha]_D^{25} = -109.4^\circ$  ( $c = 0.1$ ,  $CH_2Cl_2$ ), m.p. 41.8-43.2 °C.  $^1H$  NMR (400 MHz, Acetone- $d_6$ )  $\delta$  (ppm) 7.65 (s, 2H), 7.63 (s, 1H), 7.49-7.35 (m, 7H), 7.21 (dd,  $J_1 = 8.8$  Hz,  $J_2 = 2.7$  Hz, 1H), 7.02 (td,  $J = 8.5, 2.7$  Hz, 1H), 6.69 (d,  $J = 14.9$  Hz, 2H), 6.05 (s, 1H), 4.69 (dt,  $J_1 = 9.4$  Hz,  $J_2 = 4.6$  Hz, 1H), 4.40 (d,  $J = 4.2$  Hz, 1H), 4.15 (dd,  $J_1 = 17.8$  Hz,  $J_2 = 9.8$  Hz, 1H), 3.81 (dd,  $J_1 = 17.8$  Hz,  $J_2 = 4.88$  Hz, 1H), 3.69 (s, 3H), 2.39 (s, 3H), 2.24 (s, 3H);  $^{13}C$  NMR (101 MHz, Acetone- $d_6$ )  $\delta$  (ppm) 172.60, 171.40, 163.29, 160.83, 152.45, 144.43, 139.97, 136.76, 135.91, 135.62, 135.51, 131.51, 129.56, 129.51, 129.33, 128.98, 128.03, 117.56, 117.31, 114.67, 114.47, 111.80,

68.04, 52.49, 40.98, 36.09, 14.38, 13.84;  $^{19}\text{F}$  NMR (376 MHz, Acetone- $d_6$ )  $\delta$  61.9; HRMS (ESI): Exact mass calcd. for  $\text{C}_{30}\text{H}_{28}\text{ClFN}_3\text{O}_3^+$   $[\text{M}+\text{H}]^+$ , 532.1798. Found 532.1805; HPLC: ChiralPak AD-H, *n*-hex/*i*-PrOH = 98:2, 0.4 mL/min, 254 nm,  $t_{\text{R}}(\text{major}) = 66.839$  min,  $t_{\text{R}}(\text{minor}) = 71.248$  min, 99% *ee*.

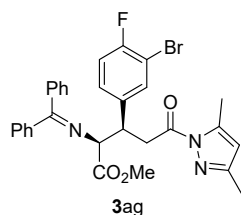

White solid; 92% yield;  $[\alpha]_{\text{D}}^{25} = -54.8^\circ$  ( $c = 0.1$ ,  $\text{CH}_2\text{Cl}_2$ ), m.p. 45.6-46.2  $^\circ\text{C}$ .  $^1\text{H}$  NMR (400 MHz, Acetone- $d_6$ )  $\delta$  (ppm) 7.66-7.58 (m, 2H), 7.50 (dd,  $J = 6.7, 2.1$  Hz, 1H), 7.45 (dt,  $J = 8.3, 3.6$  Hz, 4H), 7.38 (t,  $J = 7.4$  Hz, 2H), 7.26-7.20 (m, 1H), 7.13 (t,  $J = 8.6$  Hz, 1H), 6.96-6.87 (m, 2H), 5.99 (s, 1H), 4.28 (d,  $J = 5.6$  Hz, 1H), 4.18 (dt,  $J = 9.1, 5.5$  Hz, 1H), 3.86 (dd,  $J_1 = 17.3$  Hz,  $J_2 = 9.1$  Hz, 1H), 3.79-3.69 (m, 1H), 3.60 (s, 3H), 2.37 (s, 3H), 2.19 (s, 3H);  $^{13}\text{C}$  NMR (101 MHz, Acetone- $d_6$ )  $\delta$  (ppm) 172.61, 172.54, 171.28, 159.90, 157.47, 152.40, 144.42, 140.54, 140.51, 140.01, 136.82, 134.52, 131.55, 130.36, 130.28, 129.63, 129.51, 129.39, 128.97, 128.30, 117.11, 116.89, 111.80, 108.81, 108.60, 70.91, 52.33, 44.83, 37.13, 14.43, 13.82;  $^{19}\text{F}$  NMR (376 MHz, Acetone- $d_6$ )  $\delta$  (ppm) 65.33; HRMS (ESI): Exact mass calcd. for  $\text{C}_{30}\text{H}_{28}\text{FBrN}_3\text{O}_3^+$   $[\text{M}+\text{H}]^+$ , 576.1293. Found 576.1299; HPLC: ChiralPak AD-H, *n*-hex/*i*-PrOH = 90:10, 1.0 mL/min, 254 nm,  $t_{\text{R}}(\text{major}) = 7.834$  min,  $t_{\text{R}}(\text{minor}) = 10.536$  min, 98% *ee*.

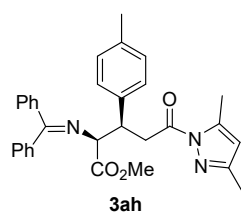

White solid; 55% yield;  $[\alpha]_{\text{D}}^{25} = -62.3^\circ$  ( $c = 0.1$ ,  $\text{CH}_2\text{Cl}_2$ ), m.p. 42.6-43.8  $^\circ\text{C}$ .  $^1\text{H}$  NMR (400 MHz, Acetone- $d_6$ )  $\delta$  (ppm) 7.45-7.44 (m, 2H), 7.36-7.28 (m, 4H), 7.25-7.21 (m, 2H), 6.93-6.87 (m, 4H), 6.77-6.74 (m, 2H), 5.81 (s, 1H), 4.14 (d,  $J = 6.1$  Hz, 1H), 4.06 (dd,  $J_1 = 13.4$  Hz,  $J_2 = 6.9$  Hz, 1H), 3.59 (d,  $J = 7.1$  Hz, 2H), 3.43 (s, 3H), 2.24 (s, 3H), 2.11 (s, 3H), 2.04 (s, 3H);  $^{13}\text{C}$  NMR (101 MHz, Acetone- $d_6$ )  $\delta$  (ppm) 172.85, 171.96, 171.54, 152.10, 144.32, 140.17, 139.47, 137.01, 136.98, 131.36, 129.69, 129.44, 129.27, 129.12, 128.87, 128.45, 111.63, 71.65, 52.10, 45.29, 37.39, 20.97, 14.48, 13.80; HRMS (ESI): Exact mass calcd. for  $\text{C}_{31}\text{H}_{32}\text{N}_3\text{O}_3^+$   $[\text{M}+\text{H}]^+$ , 492.2438. Found 492.2445; HPLC: ChiralPak AD-H, *n*-hex/*i*-PrOH = 90:10, 1.0 mL/min, 254 nm,  $t_{\text{R}}(\text{major}) = 7.856$  min,  $t_{\text{R}}(\text{minor}) = 10.332$  min, 94% *ee*.

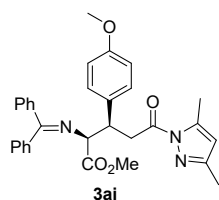

White solid; 46% yield;  $[\alpha]_{\text{D}}^{25} = -47.6^\circ$  ( $c = 0.1$ ,  $\text{CH}_2\text{Cl}_2$ ), m.p. 107.5-108.2  $^\circ\text{C}$ .  $^1\text{H}$  NMR (400 MHz, Acetone- $d_6$ )  $\delta$  (ppm) 7.60-7.57 (m, 2H), 7.45-7.42 (m, 4H), 7.36 (t,  $J = 7.4$  Hz, 2H), 7.08 (d,  $J = 8.7$  Hz, 2H), 6.93 (dd,  $J_1 = 6.3$  Hz,  $J_2 = 2.7$  Hz, 2H), 6.77 (d,  $J = 8.7$  Hz, 2H), 5.94 (s, 1H), 4.26 (d,  $J = 6.2$  Hz, 1H), 4.18 (q,  $J = 6.88$  Hz, 1H), 3.74-3.69 (m, 2H), 3.72 (s, 3H), 3.56 (s, 3H), 2.37 (s, 3H), 2.17 (s, 3H);  $^{13}\text{C}$  NMR (101 MHz, Acetone- $d_6$ )  $\delta$  (ppm) 172.87, 171.94, 171.57, 159.57, 152.10, 144.32, 140.17, 137.02, 134.30, 131.37, 130.21, 129.45, 129.30, 128.88, 128.46, 114.44, 111.63, 71.75, 55.44, 52.09, 44.96, 37.64, 14.48, 13.81; HRMS (ESI): Exact mass calcd. for

$C_{31}H_{32}N_3O_4^+ [M+H]^+$ , 510.2387. Found 510.2396; HPLC: ChiralPak AD-H, *n*-hex/*i*-PrOH = 90:10, 1.0 mL/min, 254 nm,  $t_R$ (major) = 11.882 and 19.703 min,  $t_R$ (minor) = 14.327 and 18.148 min, dr = 98:2, major: 95 % *ee*.

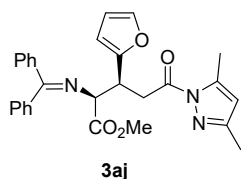

Yellow oil; 72% yield;  $[\alpha]_D^{25} = -65.7^\circ$  ( $c = 0.12$ ,  $CH_2Cl_2$ ).  $^1H$  NMR (400 MHz, Acetone- $d_6$ )  $\delta$  (ppm) 7.56 (d,  $J = 7.2$  Hz, 2H), 7.49-7.40 (m, 4H), 7.42 (d,  $J = 7.3$  Hz, 1H), 7.39-7.33 (m, 3H), 6.98 (d,  $J = 3.6$  Hz, 2H), 6.26 (dd,  $J_1 = 2.0$  Hz,  $J_2 = 3.2$  Hz, 1H), 6.09 (d,  $J = 3.2$  Hz, 1H), 6.00 (s, 1H), 4.41 (d,  $J = 5.6$  Hz, 1H), 4.32-4.29 (m, 1H), 3.79-3.67 (m, 2H), 3.64 (s, 3H), 2.43 (s, 3H), 2.19 (s, 3H);  $^{13}C$  NMR (101 MHz, Acetone- $d_6$ )  $\delta$  (ppm) 172.59, 172.36, 171.41, 155.72, 152.35, 144.48, 142.50, 140.20, 136.92, 131.41, 129.58, 129.50, 129.35, 128.85, 128.51, 111.78, 111.07, 107.21, 69.00, 52.36, 39.57, 35.73, 14.49, 13.81; HRMS (ESI): Exact mass calcd. for  $C_{28}H_{28}N_3O_4^+ [M+H]^+$ , 470.2074. Found 470.2084; HPLC: ChiralPak AD-H, *n*-hex/*i*-PrOH = 90:10, 1.0 mL/min, 254 nm,  $t_R$ (major) = 9.163 and 16.063 min, 95.5 % *ee*.

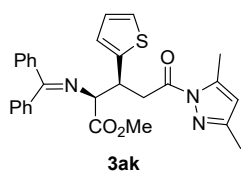

Yellow oil; 69% yield;  $[\alpha]_D^{25} = -103.3^\circ$  ( $c = 0.11$ ,  $CH_2Cl_2$ ).  $^1H$  NMR (400 MHz, Acetone- $d_6$ )  $\delta$  (ppm) 7.64-7.62 (m, 2H), 7.47-7.36 (m, 6H), 7.24-7.23 (m, 1H), 6.95-6.93 (m, 2H), 6.90-6.85 (m, 2H), 5.99 (s, 1H), 4.55-4.51 (m, 1H), 4.31 (d,  $J = 5.2$  Hz, 1H), 3.87-3.75 (m, 2H), 3.63 (s, 3H), 2.40 (s, 3H), 2.19 (s, 3H);  $^{13}C$  NMR (101 MHz, Acetone- $d_6$ )  $\delta$  (ppm) 172.57, 172.40, 171.28, 152.33, 145.59, 144.42, 140.15, 136.93, 131.49, 130.58, 129.59, 129.52, 129.34, 129.29, 128.91, 128.35, 127.37, 125.98, 124.98, 111.75, 71.52, 52.35, 41.02, 38.94, 14.46, 13.81; HRMS (ESI): Exact mass calcd. for  $C_{28}H_{28}N_3O_3S^+ [M+H]^+$ , 486.1846. Found 486.1852; HPLC: ChiralPak AD-H, *n*-hex/*i*-PrOH = 90:10, 1.0 mL/min, 254 nm,  $t_R$ (major) = 7.937 min,  $t_R$ (minor) = 11.742 min, 95 % *ee*.

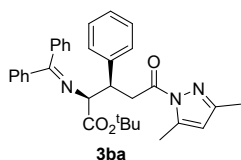

Yellow oil; 52% yield;  $[\alpha]_D^{25} = -54.4^\circ$  ( $c = 0.12$ ,  $CH_2Cl_2$ ).  $^1H$  NMR (400 MHz, Acetone- $d_6$ )  $\delta$  (ppm) 7.60-7.57 (m, 2H), 7.47-7.34 (m, 6H), 7.24-7.15 (m, 5H), 6.99-6.96 (m, 2H), 5.92 (s, 1H), 4.25-4.18 (m, 2H), 3.74-3.62 (m, 2H), 2.35 (s, 3H), 2.17 (s, 3H), 1.27 (s, 9H);  $^{13}C$  NMR (101 MHz, Acetone- $d_6$ )  $\delta$  (ppm) 171.95, 170.83, 169.21, 151.18, 143.41, 141.75, 139.39, 136.33, 130.37, 128.60, 128.50, 128.36, 128.15, 128.08, 127.94, 127.68, 126.62, 110.71, 80.48, 71.36, 45.08, 37.04, 27.09, 13.58, 12.90; HRMS (ESI): Exact mass calcd. for  $C_{33}H_{35}N_3O_3 [M+H]^+$ , 522.2757. Found 522.2745; HPLC: ChiralPak AD-H, *n*-hex/*i*-PrOH = 97:3, 0.7 mL/min, 254nm,  $t_R$ (major) = 28.096 min,  $t_R$ (minor) = 38.664 min, 98% *ee*.

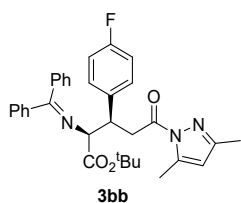

Yellow oil; 68% yield;  $[\alpha]_D^{25} = -31.1^\circ$  ( $c = 0.14$ ,  $\text{CH}_2\text{Cl}_2$ ).  $^1\text{H NMR}$  (400 MHz, Acetone- $d_6$ )  $\delta$  (ppm) 7.62-7.60 (m, 2H), 7.50-7.36 (m, 6H), 7.27-7.23 (m, 2H), 7.06-6.99 (m, 4H), 5.95 (s, 1H), 4.26-4.19 (m, 2H), 3.74-3.61 (m, 2H), 2.37 (s, 3H), 2.18 (s, 3H), 1.30 (s, 9H);  $^{13}\text{C NMR}$  (101 MHz, Acetone- $d_6$ )  $\delta$  (ppm) 171.84, 171.02, 169.11, 162.88, 160.46, 151.27, 143.43, 139.34, 137.74, 137.71, 136.28, 130.42, 130.34, 128.61, 128.53, 128.43, 127.98, 127.66, 114.77, 114.56, 110.77, 80.62, 71.27, 44.42, 37.23, 27.10, 13.57, 12.91;  $^{19}\text{F NMR}$  (376 MHz, Acetone- $d_6$ )  $\delta$  (ppm) 59.75; HRMS (ESI): Exact mass calcd for  $\text{C}_{33}\text{H}_{34}\text{FN}_3\text{O}_3$   $[\text{M}+\text{H}]^+$ , 540.2622. Found 540.2656; HPLC: ChiralPak AD-H,  $n$ -hex/ $i$ -PrOH = 95:5, 0.5 mL/min, 254 nm,  $t_{\text{R}}(\text{major}) = 15.452$  min,  $t_{\text{R}}(\text{minor}) = 26.122$  min, 98 % *ee*.

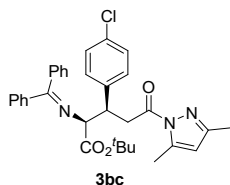

Yellow oil; 72% yield;  $[\alpha]_D^{25} = -38.5^\circ$  ( $c = 0.21$ ,  $\text{CH}_2\text{Cl}_2$ ).  $^1\text{H NMR}$  (400 MHz, Acetone- $d_6$ )  $\delta$  (ppm) 7.60 (s, 1H), 7.58 (s, 1H), 7.49-7.47 (m, 3H), 7.45-7.41 (m, 1H), 7.38-7.34 (m, 2H), 7.24 (q,  $J = 8.36$  Hz, 4H), 7.03-7.01 (m, 2H), 5.94 (s, 1H), 4.23-4.17 (m, 2H), 3.74-3.62 (m, 2H), 2.35 (s, 3H), 2.16 (s, 3H), 1.28 (s, 9H);  $^{13}\text{C NMR}$  (101 MHz, Acetone- $d_6$ )  $\delta$  (ppm) 171.77, 171.12, 169.05, 151.32, 143.46, 140.65, 139.31, 136.23, 131.94, 130.47, 130.35, 128.64, 128.54, 128.44, 128.08, 127.99, 127.65, 110.80, 80.73, 71.04, 44.52, 36.98, 27.11, 13.58, 12.91; HRMS (ESI): Exact mass calcd for  $\text{C}_{33}\text{H}_{34}\text{ClN}_3\text{O}_3$   $[\text{M}+\text{H}]^+$ , 556.2367. Found 556.2360. HPLC: ChiralPak AD-H,  $n$ -hex/ $i$ -PrOH = 90:10, 1.0 mL/min, 254 nm,  $t_{\text{R}}(\text{major}) = 5.513$  min,  $t_{\text{R}}(\text{minor}) = 9.225$  min, 98.5 % *ee*.

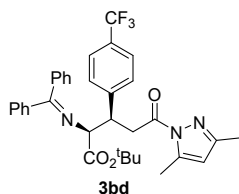

Yellow oil; 93% yield;  $[\alpha]_D^{25} = -41.5^\circ$  ( $c = 0.21$ ,  $\text{CH}_2\text{Cl}_2$ ).  $^1\text{H NMR}$  (400 MHz, Acetone- $d_6$ )  $\delta$  (ppm) 7.61-7.58 (m, 4H), 7.48-7.42 (m, 6H), 7.39-7.35 (m, 2H), 6.99-6.96 (m, 2H), 5.95 (s, 1H), 4.28 (q,  $J = 7.60$  Hz, 1H), 4.22 (d,  $J = 6.60$  Hz, 1H), 3.81-3.70 (m, 2H), 2.35 (s, 3H), 2.17 (s, 3H), 1.28 (s, 9H);  $^{13}\text{C NMR}$  (101 MHz, Acetone- $d_6$ )  $\delta$  (ppm) 171.71, 171.27, 168.96, 151.42, 146.52, 143.50, 139.27, 136.14, 130.52, 129.39, 128.66, 128.56, 128.42, 128.22, 128.01, 127.58, 124.97, 124.93, 110.85, 80.87, 70.82, 44.96, 36.72, 27.08, 13.55, 12.90;  $^{19}\text{F NMR}$  (376 MHz, Acetone- $d_6$ )  $\delta$  (ppm) -62.85; HRMS (ESI): Exact mass calcd for  $\text{C}_{33}\text{H}_{34}\text{F}_3\text{N}_3\text{O}_3$   $[\text{M}+\text{H}]^+$ , 590.2631. Found 590.2624; HPLC: ChiralPak AD-H,  $n$ -hex/ $i$ -PrOH = 90:10, 1.0 mL/min, 254 nm,  $t_{\text{R}}(\text{major}) = 4.984$  min,  $t_{\text{R}}(\text{minor}) = 8.483$  min, 98% *ee*.

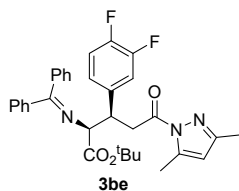

Yellow oil; 92% yield;  $[\alpha]_D^{25} = -41.3^\circ$  ( $c = 0.18$ ,  $\text{CH}_2\text{Cl}_2$ ).  $^1\text{H NMR}$  (400 MHz, Acetone- $d_6$ )  $\delta$  (ppm) 7.63-7.61 (m, 2H), 7.51-7.44 (m, 4H), 7.38-7.37 (m, 2H), 7.24-7.17 (m, 2H), 7.08-7.05 (m, 3H), 5.97 (s, 1H), 4.23-4.18 (m, 2H), 3.72-3.70 (m, 2H), 2.38 (s, 3H), 2.19 (s, 3H), 1.32 (s, 9H);  $^{13}\text{C NMR}$  (101 MHz, Acetone- $d_6$ )  $\delta$  (ppm) 171.70, 171.28, 168.97, 151.41, 143.49, 139.26, 136.17, 130.53, 128.69, 128.54, 128.47, 128.02, 127.61, 125.09, 125.06, 125.02, 117.65, 117.48, 116.89, 116.72, 110.85, 80.86, 70.87, 44.42, 36.94, 27.10, 13.56, 12.90;  $^{19}\text{F NMR}$  (376 MHz, Acetone- $d_6$ )  $\delta$  (ppm) -140.46, -140.52, -142.84, -142.90; HRMS (ESI): Exact mass calcd for  $\text{C}_{33}\text{H}_{33}\text{F}_2\text{N}_3\text{O}_3$



[M+H]<sup>+</sup>, 558.2568. Found 558.2565. HPLC: ChiralPak AD-H, *n*-hex/*i*-PrOH = 95:5, 1.0 mL/min, 254 nm, *t*<sub>R</sub>(major) = 6.929 min, *t*<sub>R</sub>(minor) = 11.534 min, 98% *ee*.

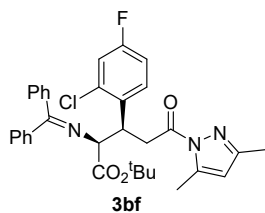

Yellow oil; 87% yield;  $[\alpha]_{\text{D}}^{25} = -57.6^\circ$  ( $c = 0.13$ , CH<sub>2</sub>Cl<sub>2</sub>). <sup>1</sup>H NMR (400 MHz, Acetone-*d*<sub>6</sub>)  $\delta$  (ppm) 7.63-7.60 (m, 2H), 7.46-7.33 (m, 6H), 7.20 (dd,  $J_1 = 2.64$  Hz,  $J_2 = 6.12$  Hz, 1H), 7.03-6.98 (m, 1H), 6.78 (d,  $J = 5.40$  Hz, 2H), 6.00 (s, 1H), 4.71-4.69 (m, 1H), 4.29 (d,  $J = 5.04$  Hz, 1H), 3.97 (dd,  $J_1 = 9.62$  Hz,  $J_2 = 7.64$  Hz, 1H), 3.77 (dd,  $J_1 = 12.28$  Hz,  $J_2 = 5.0$  Hz, 1H), 2.36 (s, 3H), 2.21 (s, 3H), 1.36 (s, 9H); <sup>13</sup>C NMR (101 MHz, Acetone-*d*<sub>6</sub>)  $\delta$  (ppm) 177.77, 171.72, 171.34, 169.10, 162.34, 159.89, 151.45, 143.50, 139.24, 136.17, 135.29, 135.26, 134.73, 134.63, 130.77, 130.68, 130.48, 128.62, 128.56, 128.40, 128.03, 127.30, 121.90, 116.59, 116.34, 113.72, 113.51, 110.88, 102.71, 96.59, 95.52, 80.91, 68.29, 40.47, 35.68, 27.17, 13.52, 12.93.; <sup>19</sup>F NMR (376 MHz, Acetone-*d*<sub>6</sub>) -115.62; HRMS (ESI): Exact mass calcd for C<sub>33</sub>H<sub>33</sub>ClFN<sub>3</sub>O<sub>3</sub> [M+H]<sup>+</sup>, 574.2273. Found 574.2265; HPLC: ChiralPak AD-H, *n*-hex/*i*-PrOH = 95:5, 0.5 mL/min, 254 nm, *t*<sub>R</sub>(major) = 14.634 min, *t*<sub>R</sub>(minor) = 16.468 min, 98% *ee*.

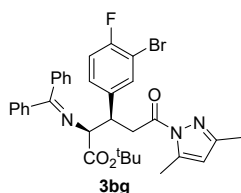

Yellow oil; 90% yield;  $[\alpha]_{\text{D}}^{25} = -47.8^\circ$  ( $c = 0.21$ , CH<sub>2</sub>Cl<sub>2</sub>). <sup>1</sup>H NMR (400 MHz, Acetone-*d*<sub>6</sub>)  $\delta$  (ppm) 7.62-7.60 (m, 2H), 7.53-7.35 (m, 8H), 7.27-7.23 (m, 1H), 7.15 (t,  $J = 8.64$  Hz, 1H), 7.03-7.01 (m, 1H), 5.96 (s, 1H), 4.19-4.16 (m, 2H), 3.73-3.66 (m, 2H), 2.36 (s, 3H), 2.19 (s, 3H), 1.30 (s, 9H); <sup>13</sup>C NMR (101 MHz, Acetone-*d*<sub>6</sub>)  $\delta$  (ppm) 171.72, 171.30, 168.96, 151.44, 143.49, 139.67, 139.27, 136.18, 133.85, 130.53, 129.63, 129.56, 128.70, 128.56, 128.47, 128.02, 127.60, 117.56, 116.14, 115.92, 110.88, 109.65, 107.78, 107.57, 96.40, 80.89, 70.85, 44.31, 36.86, 27.11, 13.55, 12.91; <sup>19</sup>F NMR (376 MHz, Acetone-*d*<sub>6</sub>)  $\delta$  (ppm) -112.26; HRMS (ESI): Exact mass calcd for C<sub>33</sub>H<sub>33</sub>BrFN<sub>3</sub>O<sub>3</sub> [M+H]<sup>+</sup>, 618.1768. Found 618.1750; HPLC: ChiralPak AD-H, *n*-hex/*i*-PrOH = 95:5, 0.5 mL/min, 254 nm, *t*<sub>R</sub>(major) = 13.978 min, *t*<sub>R</sub>(minor) = 22.215 min, 98.4% *ee*.

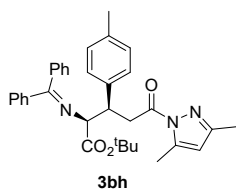

Yellow oil; 23% yield;  $[\alpha]_{\text{D}}^{25} = -24.2^\circ$  ( $c = 0.14$ , CH<sub>2</sub>Cl<sub>2</sub>). <sup>1</sup>H NMR (400 MHz, Acetone-*d*<sub>6</sub>)  $\delta$  (ppm) 7.59-7.57 (m, 2H), 7.47-7.40 (m, 4H), 7.37-7.34 (m, 2H), 7.04 (q,  $J = 8.0$  Hz, 4H), 6.99-6.96 (m, 2H), 5.92 (s, 3H), 4.21-4.15 (m, 2H), 3.70-3.59 (m, 2H), 2.35 (s, 3H), 2.24 (s, 3H), 2.16 (s, 3H), 1.28 (s, 9H); <sup>13</sup>C NMR (101 MHz, Acetone-*d*<sub>6</sub>)  $\delta$  (ppm) 172.00, 170.72, 169.27, 151.13, 143.39, 139.43, 138.70, 136.35, 136.00, 130.35, 128.66, 128.50, 128.45, 128.34, 127.93, 127.71, 110.70, 80.43, 71.47, 44.62, 37.05, 27.13, 20.10, 13.61, 12.91; HRMS (ESI): Exact mass calcd for C<sub>34</sub>H<sub>37</sub>N<sub>3</sub>O<sub>3</sub> [M+H]<sup>+</sup>, 536.2913. Found 536.2910; HPLC: ChiralPak AD-H, *n*-hex/*i*-PrOH = 90:10, 1.0 mL/min, 254 nm, *t*<sub>R</sub>(major) = 5.147 min, *t*<sub>R</sub>(minor) = 7.191 min, 97% *ee*.

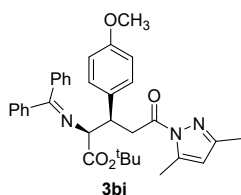

Yellow oil; 10% yield;  $[\alpha]_{\text{D}}^{25} = -25.4^{\circ}$  ( $c = 0.05$ ,  $\text{CH}_2\text{Cl}_2$ ).  $^1\text{H}$  NMR (400 MHz, Acetone- $d_6$ )  $\delta$  (ppm) 7.60 (s, 1H), 7.58 (s, 1H), 7.48-7.34 (m, 6H), 7.11 (s, 1H), 7.09 (s, 1H), 7.03-7.01 (m, 2H), 6.79 (s, 1H), 6.77 (s, 1H), 5.92 (s, 1H), 4.20-4.15 (m, 2H), 3.72 (s, 3H), 3.64-3.61 (m, 2H), 2.35 (s, 3H), 2.16 (s, 3H), 1.28 (s, 9H);  $^{13}\text{C}$  NMR (101 MHz, Acetone- $d_6$ )  $\delta$  (ppm) 172.01, 170.70, 169.30, 158.65, 151.12, 143.38, 139.43, 136.37, 133.53, 130.35, 129.52, 128.50, 128.36, 127.94, 127.72, 113.42, 110.69, 80.39, 71.59, 54.55, 44.29, 37.28, 27.13, 13.60, 12.90; HRMS (ESI): Exact mass calcd for  $\text{C}_{34}\text{H}_{37}\text{N}_3\text{O}_4$   $[\text{M}+\text{H}]^+$ , 552.2862. Found 552.2855; HPLC: ChiralPak AD-H, *n*-hex/*i*-PrOH = 90:10, 1.0 mL/min, 254 nm,  $t_{\text{R}}(\text{major}) = 6.600$  min,  $t_{\text{R}}(\text{minor}) = 12.092$  min, 96% *ee*.

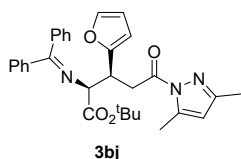

Yellow oil; 44% yield;  $[\alpha]_{\text{D}}^{25} = -94.2^{\circ}$  ( $c = 0.11$ ,  $\text{CH}_2\text{Cl}_2$ ).  $^1\text{H}$  NMR (400 MHz, Acetone- $d_6$ )  $\delta$  (ppm) 7.57-7.55 (m, 2H), 7.52-7.49 (m, 3H), 7.41 (d,  $J = 7.24$  Hz, 1H), 7.37-7.32 (m, 3H), 7.05-7.03 (m, 2H), 6.27 (dd,  $J_1 = 1.88$  Hz,  $J_2 = 1.2$  Hz, 1H), 6.09 (d,  $J = 2.84$  Hz, 1H), 5.97 (s, 1H), 4.34-4.27 (m, 2H), 3.75-3.63 (m, 2H), 2.42 (s, 3H), 2.17 (s, 3H), 1.38 (s, 9H);  $^{13}\text{C}$  NMR (101 MHz, Acetone- $d_6$ )  $\delta$  (ppm) 171.75, 171.12, 169.10, 155.04, 151.39, 143.55, 141.46, 139.42, 136.27, 130.40, 128.64, 128.54, 128.41, 127.92, 127.73, 110.86, 110.13, 106.34, 80.82, 68.92, 38.71, 35.12, 27.19, 13.63, 12.91; HRMS (ESI): Exact mass calcd for  $\text{C}_{31}\text{H}_{33}\text{N}_3\text{O}_4$   $[\text{M}+\text{H}]^+$ , 512.2549. Found 512.2546. HPLC: ChiralPak AD-H, *n*-hex/*i*-PrOH = 98:2, 0.5 mL/min, 254 nm, merged; ChiralPak OD-H, *n*-hex/*i*-PrOH = 98:2, 0.5 mL/min, 254 nm, merged.

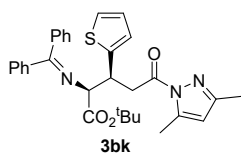

Yellow oil; 45% yield;  $[\alpha]_{\text{D}}^{25} = -105.0^{\circ}$  ( $c = 0.12$ ,  $\text{CH}_2\text{Cl}_2$ ).  $^1\text{H}$  NMR (400 MHz, Acetone- $d_6$ )  $\delta$  (ppm) 7.62 (d,  $J = 7.2$  Hz, 2H), 7.48-7.42 (m, 4H), 7.37 (t,  $J = 7.64$  Hz, 2H), 7.23 (d,  $J = 4.96$  Hz, 1H), 7.03-7.00 (m, 2H), 6.89-6.85 (m, 2H), 5.96 (s, 1H), 4.53 (q,  $J = 5.96$  Hz, 1H), 4.20 (d,  $J = 5.64$  Hz, 1H), 3.75 (dd,  $J_1 = 4.48$  Hz,  $J_2 = 3.44$  Hz, 2H), 2.39 (s, 3H), 2.17 (s, 3H), 1.35 (s, 9H);  $^{13}\text{C}$  NMR (101 MHz, Acetone- $d_6$ )  $\delta$  (ppm) 171.54, 171.29, 168.98, 151.38, 144.76, 143.50, 139.38, 136.27, 130.47, 128.63, 128.60, 128.39, 127.98, 127.61, 126.32, 125.14, 124.02, 110.83, 80.88, 71.33, 40.23, 38.37, 27.17, 13.60, 12.92; HRMS (ESI): Exact mass calcd for  $\text{C}_{31}\text{H}_{33}\text{N}_3\text{O}_3\text{S}$   $[\text{M}+\text{H}]^+$ , 528.2321. Found 528.2319. HPLC: ChiralPak AD-H, *n*-hex/*i*-PrOH = 90:10, 1.0 mL/min, 254 nm,  $t_{\text{R}}(\text{major}) = 5.484$  min,  $t_{\text{R}}(\text{minor}) = 6.355$  min, 97.2% *ee*.

## 2.2 General procedure for acidic hydrolysis and *in-situ* lactamation

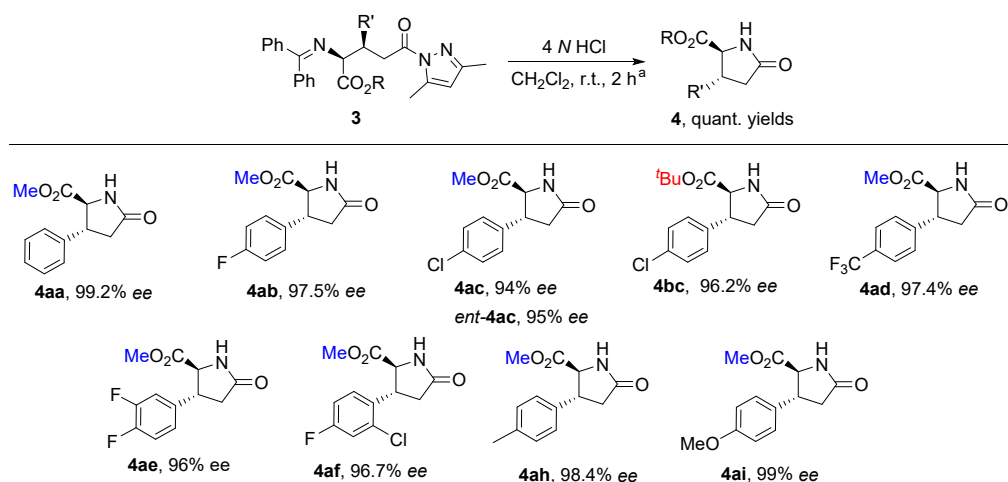

a. All reactions were performed in 0.5 mmol scale; b. The ee of products was determined by chiral HPLC column (Diacel ChiralPak AD-H).

The Michael adduct **3aa** (0.5 mmol, 0.24 g) was treated by 4.0 M HCl aq. (0.5 mL) in CH<sub>2</sub>Cl<sub>2</sub> (2.0 mL) at room temperature. When **3aa** was completely consumed (checked by a TLC), the reaction mixture was diluted by 10.0 mL of CH<sub>2</sub>Cl<sub>2</sub>, the organic layer was washed by 5.0 mL of water and 5.0 mL of brine, then it was dried over anhydrous Na<sub>2</sub>SO<sub>4</sub>. The solvent was removed by an evaporator and the residue was purified by a flash column chromatography to provide pure **4aa** in quant. yield as white solid.

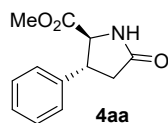

White solid; quant. yield;  $[\alpha]_{\text{D}}^{25} = 52.4^\circ$  ( $c = 0.05$ , CH<sub>2</sub>Cl<sub>2</sub>), m.p. 108.5-109.6 °C. <sup>1</sup>H NMR (400 MHz, Acetone-*d*<sub>6</sub>)  $\delta$  (ppm) 7.38-7.36(m, 4H), 7.34-7.26 (m, 1H), 7.21 (br, 1H), 4.26 (d,  $J = 4.92$  Hz, 1H), 3.73-3.68 (m, 1H, merged), 3.70 (s, 3H, OCH<sub>3</sub>), 2.73 (dd,  $J_1 = 9.32$  Hz,  $J_2 = 7.52$  Hz, 1H), 2.33 (dd,  $J_1 = 10.6$  Hz,  $J_2 = 6.28$  Hz, 1H); <sup>13</sup>C NMR (101 MHz, Acetone-*d*<sub>6</sub>)  $\delta$  (ppm) 176.15, 173.17, 143.83, 129.70, 128.01, 127.79, 63.43, 52.54, 44.91, 38.37; HRMS (ESI): Exact mass calcd for C<sub>12</sub>H<sub>14</sub>NO<sub>3</sub> [M+H]<sup>+</sup>, 220.0974. Found 220.0978. HPLC: ChiralPak AD-H, *n*-hex/*i*-PrOH = 90:10, 1.0 mL/min, 230 nm,  $t_{\text{R}}$ (major) = 17.442 min,  $t_{\text{R}}$ (minor) = 23.850 min, 99.2% ee.

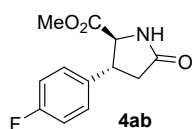

White solid; quant. yield;  $[\alpha]_{\text{D}}^{25} = 57.1^\circ$  ( $c = 0.05$ , CH<sub>2</sub>Cl<sub>2</sub>), m.p. 75.2-76.5 °C. <sup>1</sup>H NMR (400 MHz, Acetone-*d*<sub>6</sub>)  $\delta$  (ppm) 7.43 (dd,  $J_1 = 5.56$  Hz,  $J_2 = 2.52$  Hz, 2H), 7.36 (br, 1H), 7.13 (t,  $J = 8.72$  Hz, 2H), 4.26 (d,  $J = 5.2$  Hz, 1H), 3.76-3.72 (m, 1H), 3.73 (s, 3H, OCH<sub>3</sub>), 2.74 (dd,  $J_1 = 9.28$  Hz,  $J_2 = 7.6$  Hz, 1H), 2.35 (dd,  $J_1 = 10.24$  Hz,  $J_2 = 6.6$  Hz, 1H); <sup>13</sup>C NMR (101 MHz, Acetone-*d*<sub>6</sub>)  $\delta$  (ppm) 176.24, 173.01, 164.00, 161.58, 139.72 (d,  $J_{\text{C-F}} = 3.06$  Hz), 129.82, 116.39, 116.18, 63.53, 52.60, 44.26, 38.54; <sup>19</sup>F NMR (376 MHz, Acetone-*d*<sub>6</sub>)  $\delta$  (ppm) 60.27; HRMS (ESI): Exact mass calcd for C<sub>12</sub>H<sub>13</sub>FNO<sub>3</sub> [M+H]<sup>+</sup>, 238.0879. Found 238.0884. HPLC: ChiralPak AD-H, *n*-hex/*i*-PrOH = 90:10, 1.0 mL/min, 230 nm,  $t_{\text{R}}$ (major) = 16.263 min,  $t_{\text{R}}$ (minor) = 22.227 min, 97.5% ee.

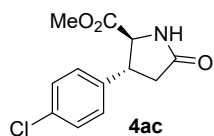

White solid; quant. yield;  $[\alpha]_D^{25} = 61.9^\circ$  ( $c = 0.05$ ,  $\text{CH}_2\text{Cl}_2$ ), 104.1-104.9 °C.  $^1\text{H}$  NMR (400 MHz, Acetone- $d_6$ )  $\delta$  (ppm) 7.43-7.38 (m, 4H), 7.24 (m, 1H), 4.26 (d,  $J = 5.16$  Hz, 1H), 3.74-3.72 (m, 1H), 3.70 (s, 3H,  $\text{OCH}_3$ ), 2.73 (dd,  $J_1 = 9.28$  Hz,  $J_2 = 7.56$  Hz, 1H), 2.34 (dd,  $J_1 = 10.32$  Hz,  $J_2 = 6.56$  Hz, 1H);  $^{13}\text{C}$  NMR (101 MHz, Acetone- $d_6$ )  $\delta$  (ppm) 175.90, 172.92, 142.59, 133.29, 129.72, 129.67, 63.25, 52.58, 44.34, 38.34; HRMS (ESI): Exact mass calcd for  $\text{C}_{12}\text{H}_{13}\text{ClNO}_3$   $[\text{M}+\text{H}]^+$ , 254.0578. Found 254.0588. HPLC: ChiralPak AD-H,  $n$ -hex/ $i$ -PrOH = 80:20, 1.0 mL/min, 230 nm,  $t_{\text{R}}(\text{major}) = 8.933$  min,  $t_{\text{R}}(\text{minor}) = 12.187$  min, 94% *ee*.

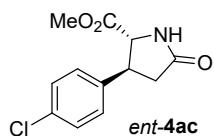

White solid; quant. yield;  $[\alpha]_D^{25} = -63.3^\circ$  ( $c = 0.05$ ,  $\text{CH}_2\text{Cl}_2$ ), m.p. 103.4-104.2 °C.  $^1\text{H}$  NMR (400 MHz, Acetone- $d_6$ )  $\delta$  (ppm) 7.43-7.40 (m, 4H), 7.24 (br, 1H), 4.26 (d,  $J = 5.16$  Hz, 1H), 3.74-3.72 (m, 1H), 3.70 (s, 3H,  $\text{OCH}_3$ ), 2.73 (dd,  $J_1 = 9.28$  Hz,  $J_2 = 7.56$  Hz, 1H), 2.34 (dd,  $J_1 = 10.32$  Hz,  $J_2 = 6.56$  Hz, 1H);  $^{13}\text{C}$  NMR (101 MHz, Acetone- $d_6$ )  $\delta$  (ppm) 175.85, 172.93, 142.60, 133.28, 129.74, 129.67, 63.23, 52.58, 44.34, 38.34; HPLC: ChiralPak AD-H,  $n$ -hex/ $i$ -PrOH = 80:20, 1.0 mL/min, 230 nm,  $t_{\text{R}}(\text{major}) = 12.578$  min,  $t_{\text{R}}(\text{minor}) = 9.064$  min, 95% *ee*.

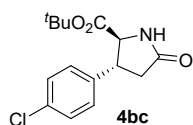

Yellow oil; quant. yield;  $[\alpha]_D^{25} = 107.2^\circ$  ( $c = 0.052$ ,  $\text{CH}_2\text{Cl}_2$ ).  $^1\text{H}$  NMR (400 MHz, Acetone- $d_6$ )  $\delta$  (ppm) 7.45-7.38 (m, 4H), 7.28 (m, 1H), 4.14 (d,  $J = 5.96$  Hz, 1H), 3.70-3.64 (m, 1H), 2.70 (dd,  $J_1 = 9.2$  Hz,  $J_2 = 7.56$  Hz, 1H), 2.36 (dd,  $J_1 = 9.4$  Hz,  $J_2 = 7.4$  Hz, 1H), 1.41 (s, 9H,  $t\text{Bu}$ );  $^{13}\text{C}$  NMR (101 MHz, Acetone- $d_6$ )  $\delta$  (ppm) 175.84, 171.53, 142.56, 133.18, 129.96, 129.56, 82.21, 63.99, 44.77, 38.73, 28.08; HRMS (ESI): Exact mass calcd for  $\text{C}_{15}\text{H}_{19}\text{ClNO}_3$   $[\text{M}+\text{H}]^+$ , 296.1048. Found 296.1057. HPLC: ChiralPak AD-H,  $n$ -hex/ $i$ -PrOH = 90:10, 1.0 mL/min, 230 nm,  $t_{\text{R}}(\text{major}) = 13.567$  min,  $t_{\text{R}}(\text{minor}) = 21.331$  min, 96.2% *ee*.

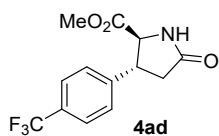

White solid; quant. yield;  $[\alpha]_D^{25} = 73.4^\circ$  ( $c = 0.05$ ,  $\text{CH}_2\text{Cl}_2$ ), m.p. 106.5-108.2 °C.  $^1\text{H}$  NMR (400 MHz, Acetone- $d_6$ )  $\delta$  (ppm) 7.73 (d,  $J = 8.16$  Hz, 2H), 7.64 (d,  $J = 8.12$  Hz, 2H), 7.25 (br, 1H), 4.33 (d,  $J = 5.2$  Hz, 1H), 3.88-3.83 (m, 1H), 3.1 (s, 3H,  $\text{OCH}_3$ ), 2.78 (dd,  $J_1 = 9.24$  Hz,  $J_2 = 7.64$  Hz, 1H), 2.40 (dd,  $J_1 = 10.32$  Hz,  $J_2 = 6.56$  Hz, 1H);  $^{13}\text{C}$  NMR (101 MHz, Acetone- $d_6$ )  $\delta$  (ppm) 175.64, 172.82, 148.28, 128.83, 126.56 (q,  $J_{\text{C-F}} = 3.90$  Hz), 62.95, 52.62, 44.64, 38.24;  $^{19}\text{F}$  NMR (376 MHz, Acetone- $d_6$ )  $\delta$  (ppm) 114.51; HRMS (ESI): Exact mass calcd for  $\text{C}_{13}\text{H}_{12}\text{F}_3\text{NO}_3$   $[\text{M}+\text{H}]^+$ , 288.0848. Found 288.0853. HPLC: ChiralPak AD-H,  $n$ -hex/ $i$ -PrOH = 90:10, 1.0 mL/min, 230 nm,  $t_{\text{R}}(\text{major}) = 12.691$  min,  $t_{\text{R}}(\text{minor}) = 21.193$  min, 97.4% *ee*.

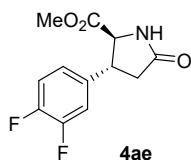

White solid; quant. yield;  $[\alpha]_D^{25} = 21.7^\circ$  ( $c = 0.05$ ,  $\text{CH}_2\text{Cl}_2$ ), m.p. 87.7-88.6 °C.  $^1\text{H}$  NMR (400 MHz, Acetone- $d_6$ )  $\delta$  (ppm) 7.45-7.40 (m, 2H), 7.35-7.29 (m, 1H), 7.26 (br, 1H), 4.31 (d,  $J = 5.68$  Hz, 1H), 3.78-3.73 (m, 1H), 3.70 (s, 3H, OCH<sub>3</sub>), 2.74 (dd,  $J_1 = 9.28$  Hz,  $J_2 = 7.6$  Hz, 1H), 2.39 (dd,  $J_1 = 9.8$  Hz,  $J_2 = 7.08$  Hz, 1H);  $^{13}\text{C}$  NMR (101 MHz, Acetone- $d_6$ )  $\delta$  (ppm) 175.89, 172.78, 151.75 (dd,  $J_{\text{C-F}} = 74.62$ , 12.76 Hz), 149.31 (dd,  $J_{\text{C-F}} = 74.18$ , 12.70 Hz), 141.09 (dd,  $J_{\text{C-F}} = 3.90$ , 1.12 Hz), 124.79 (dd,  $J_{\text{C-F}} = 3.54$ , 1.24 Hz), 118.40 (d,  $J_{\text{C-F}} = 17.10$  Hz), 117.11 (d,  $J_{\text{C-F}} = 17.80$  Hz), 63.19, 52.65, 44.23, 38.50;  $^{19}\text{F}$  NMR (376 MHz, Acetone- $d_6$ )  $\delta$  (ppm) 38.05, 37.99, 35.16, 35.10; HRMS (ESI): Exact mass calcd for  $\text{C}_{12}\text{H}_{11}\text{F}_2\text{NO}_3$   $[\text{M}+\text{H}]^+$ , 256.0785. Found 256.0787. HPLC: ChiralPak AD-H, *n*-hex/*i*-PrOH = 90:10, 1.0 mL/min, 230 nm,  $t_{\text{R}}(\text{major}) = 17.222$ ,  $t_{\text{R}}(\text{minor}) = 21.366$  min, 96% *ee*.

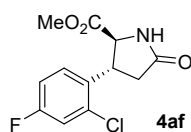

White solid; quant. yield;  $[\alpha]_D^{25} = 65.3^\circ$  ( $c = 0.05$ ,  $\text{CH}_2\text{Cl}_2$ ), m.p. 67.8-69.4 °C.  $^1\text{H}$  NMR (400 MHz, Acetone- $d_6$ )  $\delta$  (ppm) 7.61 (dd,  $J_1 = 2.68$  Hz,  $J_2 = 6.0$  Hz, 1H), 7.37 (brs, 1H), 7.31 (dd,  $J_1 = 2.6$  Hz,  $J_2 = 6.08$  Hz, 1H), 7.20 (td,  $J_1 = 2.52$  Hz,  $J_2 = 5.84$  Hz, 1H), 4.32 (d,  $J = 4.88$  Hz, 1H), 4.16-4.11 (m, 1H), 3.71 (s, 3H), 2.79 (dd,  $J_1 = 7.6$  Hz,  $J_2 = 9.32$  Hz, 1H), 2.35 (dd,  $J_1 = 6.08$  Hz,  $J_2 = 10.84$  Hz, 1H);  $^{19}\text{F}$  NMR (376 MHz, Acetone- $d_6$ )  $\delta$  (ppm) 62.78; HRMS (ESI): Exact mass calcd for  $\text{C}_{12}\text{H}_{11}\text{ClFNO}_3$   $[\text{M}+\text{H}]^+$ , 272.0490. Found 272.0494. HPLC: ChiralPak AD-H, *n*-hex/*i*-PrOH = 90:10, 1.0 mL/min, 230 nm,  $t_{\text{R}}(\text{major}) = 17.278$  min,  $t_{\text{R}}(\text{minor}) = 23.051$  min, 96.7% *ee*.

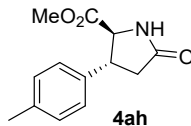

White solid; quant. yield;  $[\alpha]_D^{25} = 41.7^\circ$  ( $c = 0.05$ ,  $\text{CH}_2\text{Cl}_2$ ), m.p. 83.5-84.4 °C.  $^1\text{H}$  NMR (400 MHz, Acetone- $d_6$ )  $\delta$  (ppm) 7.34 (brs, 1H), 7.24 (d,  $J = 8.0$  Hz, 4H), 7.17 ((d,  $J = 7.88$  Hz, 2H), 4.22 ((d,  $J = 5.0$  Hz, 1H), 3.69 (s, 3H, OCH<sub>3</sub>), 3.68-3.62 (m, 1H), 2.71 (dd,  $J_1 = 7.56$  Hz,  $J_2 = 9.28$  Hz, 1H), 2.32 (dd,  $J_1 = 6.36$  Hz,  $J_2 = 10.6$  Hz, 1H), 2.30 (s, 3H, CH<sub>3</sub>);  $^{13}\text{C}$  NMR (101 MHz, Acetone- $d_6$ )  $\delta$  (ppm) 176.48, 173.22, 140.76, 137.48, 130.29, 127.70, 63.62, 52.56, 44.61, 38.48, 21.04; HRMS (ESI): Exact mass calcd for  $\text{C}_{13}\text{H}_{15}\text{NO}_3$   $[\text{M}+\text{H}]^+$ , 234.1130. Found 234.1113. HPLC: ChiralPak AD-H, *n*-hex/*i*-PrOH = 90:10, 1.0 mL/min, 230 nm,  $t_{\text{R}}(\text{major}) = 15.964$  min,  $t_{\text{R}}(\text{minor}) = 20.338$  min, 98.4% *ee*.

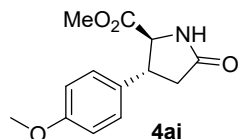

Yellow oil; quant. yield;  $[\alpha]_D^{25} = 43.8^\circ$  ( $c = 0.05$ ,  $\text{CH}_2\text{Cl}_2$ ).  $^1\text{H}$  NMR (400 MHz, Acetone- $d_6$ )  $\delta$  (ppm) 7.30 (d,  $J = 8.68$  Hz, 2H), 7.16 (br, 1H), 6.93 (d,  $J = 8.72$  Hz, 2H), 4.22 (d,  $J = 5.12$  Hz, 1H), 3.80 (s, 3H), 3.71 (s, 3H), 3.68-3.63 (m, 1H), 2.70 (dd,  $J_1 = 7.6$  Hz,  $J_2 = 9.24$  Hz, 1H), 2.32 (dd,  $J_1 = 6.48$  Hz,  $J_2 = 10.32$  Hz, 1H);  $^{13}\text{C}$  NMR (101 MHz, Acetone- $d_6$ )  $\delta$  (ppm) 176.20, 173.22, 159.85, 135.61, 128.84, 115.00, 63.70, 55.53, 52.48, 44.33, 38.48; HRMS (ESI): Exact mass calcd for  $\text{C}_{13}\text{H}_{16}\text{NO}_4$   $[\text{M}+\text{H}]^+$ , 250.1079. Found 250.1081. HPLC: ChiralPak AD-H, *n*-hex/*i*-PrOH = 90:10, 1.0 mL/min, 230 nm,  $t_{\text{R}}(\text{major}) = 22.536$ ,  $t_{\text{R}}(\text{minor}) = 30.339$  min, 99% *ee*.

### 3. X-ray single crystal diffraction analysis of **4ac** and *ent-4ac*

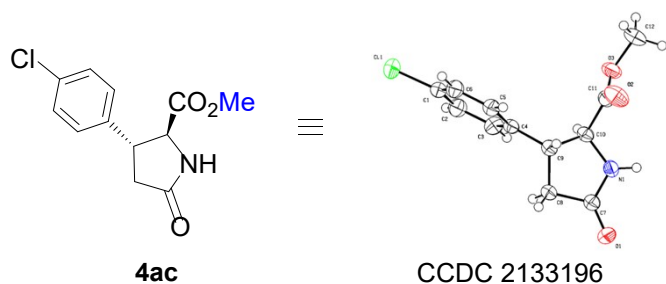

Crystals of **4ac** was obtained by recrystallization from the mixed solvent of *n*-hexane and dichloromethane. CCDC 2133196 contains its detail crystal structure data.

**Table S1** Crystal data and structure refinement for C<sub>12</sub>H<sub>12</sub>ClNO<sub>3</sub> of **4ac**

|                                                              |                                                                              |
|--------------------------------------------------------------|------------------------------------------------------------------------------|
| Empirical formula                                            | C <sub>12</sub> H <sub>12</sub> ClNO <sub>3</sub>                            |
| Formula weight                                               | 253.68                                                                       |
| Temperature/K                                                | 230.00(10)                                                                   |
| Crystal system                                               | orthorhombic                                                                 |
| Space group                                                  | P2 <sub>1</sub> 2 <sub>1</sub> 2 <sub>1</sub>                                |
| <i>a</i> /Å                                                  | 5.78020(10)                                                                  |
| <i>b</i> /Å                                                  | 7.48790(10)                                                                  |
| <i>c</i> /Å                                                  | 27.7844(5)                                                                   |
| $\alpha$ /°                                                  | 90                                                                           |
| $\beta$ /°                                                   | 90                                                                           |
| $\gamma$ /°                                                  | 90                                                                           |
| Volume/Å <sup>3</sup>                                        | 1202.55(3)                                                                   |
| <i>Z</i>                                                     | 4                                                                            |
| $\rho_{\text{calc}}$ /cm <sup>3</sup>                        | 1.401                                                                        |
| $\mu$ /mm <sup>-1</sup>                                      | 2.798                                                                        |
| <i>F</i> (000)                                               | 528.0                                                                        |
| Crystal size/mm <sup>3</sup>                                 | 0.11 × 0.1 × 0.09                                                            |
| Radiation                                                    | CuK $\alpha$ ( $\lambda$ = 1.54184)                                          |
| 2 $\theta$ range for data collection/°                       | 12.242 to 131.862                                                            |
| Index ranges                                                 | -6 ≤ <i>h</i> ≤ 6, -8 ≤ <i>k</i> ≤ 8, -29 ≤ <i>l</i> ≤ 32                    |
| Reflections collected                                        | 4506                                                                         |
| Independent reflections                                      | 2082 [ <i>R</i> <sub>int</sub> = 0.0181, <i>R</i> <sub>sigma</sub> = 0.0221] |
| Data/restraints/parameters                                   | 2082/0/156                                                                   |
| Goodness-of-fit on <i>F</i> <sup>2</sup>                     | 1.084                                                                        |
| Final <i>R</i> indexes [ <i>I</i> ≥ 2 $\sigma$ ( <i>I</i> )] | <i>R</i> <sub>1</sub> = 0.0251, <i>wR</i> <sub>2</sub> = 0.0661              |
| Final <i>R</i> indexes [all data]                            | <i>R</i> <sub>1</sub> = 0.0261, <i>wR</i> <sub>2</sub> = 0.0669              |
| Largest diff. peak/hole / e Å <sup>-3</sup>                  | 0.14/-0.19                                                                   |
| Flack parameter                                              | 0.004(6)                                                                     |

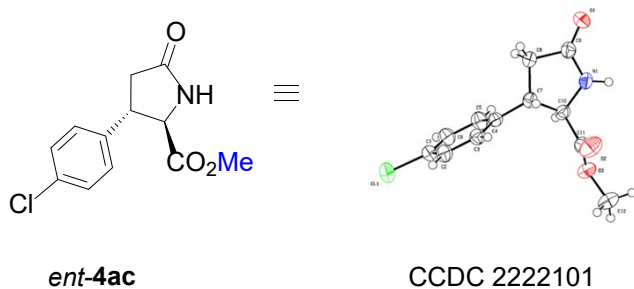

Crystals of *ent*-4ac was obtained by recrystallization from the mixed solvent of *n*-hexane and dichloromethane. CCDC 2222101 contains its detail crystal structure data.

**Table S2** Crystal data and structure refinement for C<sub>12</sub>H<sub>12</sub>ClNO<sub>3</sub> of *ent*-4ac

|                                             |                                                               |
|---------------------------------------------|---------------------------------------------------------------|
| Empirical formula                           | C <sub>12</sub> H <sub>12</sub> ClNO <sub>3</sub>             |
| Formula weight                              | 253.68                                                        |
| Temperature/K                               | 240.00(10)                                                    |
| Crystal system                              | orthorhombic                                                  |
| Space group                                 | P2 <sub>1</sub> 2 <sub>1</sub> 2 <sub>1</sub>                 |
| a/Å                                         | 5.7785(3)                                                     |
| b/Å                                         | 7.4826(3)                                                     |
| c/Å                                         | 27.8645(11)                                                   |
| α/°                                         | 90                                                            |
| β/°                                         | 90                                                            |
| γ/°                                         | 90                                                            |
| Volume/Å <sup>3</sup>                       | 1204.81(9)                                                    |
| Z                                           | 4                                                             |
| ρ <sub>calc</sub> /cm <sup>3</sup>          | 1.399                                                         |
| μ/mm <sup>-1</sup>                          | 2.793                                                         |
| F(000)                                      | 528.0                                                         |
| Crystal size/mm <sup>3</sup>                | 0.13 × 0.12 × 0.11                                            |
| Radiation                                   | CuKα (λ = 1.54184)                                            |
| 2θ range for data collection/°              | 12.248 to 133.028                                             |
| Index ranges                                | -6 ≤ h ≤ 4, -6 ≤ k ≤ 8, -22 ≤ l ≤ 33                          |
| Reflections collected                       | 3366                                                          |
| Independent reflections                     | 2090 [R <sub>int</sub> = 0.0225, R <sub>sigma</sub> = 0.0339] |
| Data/restraints/parameters                  | 2090/0/155                                                    |
| Goodness-of-fit on F <sup>2</sup>           | 1.045                                                         |
| Final R indexes [I >= 2σ (I)]               | R <sub>1</sub> = 0.0348, wR <sub>2</sub> = 0.0792             |
| Final R indexes [all data]                  | R <sub>1</sub> = 0.0405, wR <sub>2</sub> = 0.0840             |
| Largest diff. peak/hole / e Å <sup>-3</sup> | 0.13/-0.17                                                    |
| Flack parameter                             | 0.029(13)                                                     |

## 4. NMR Copies

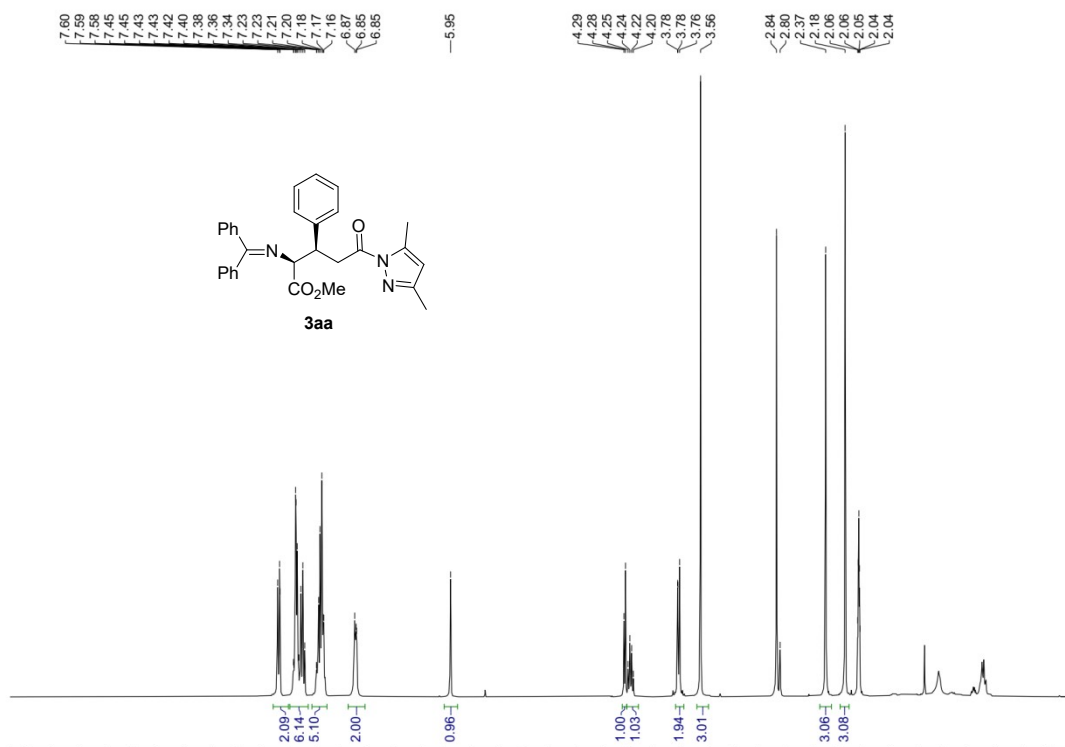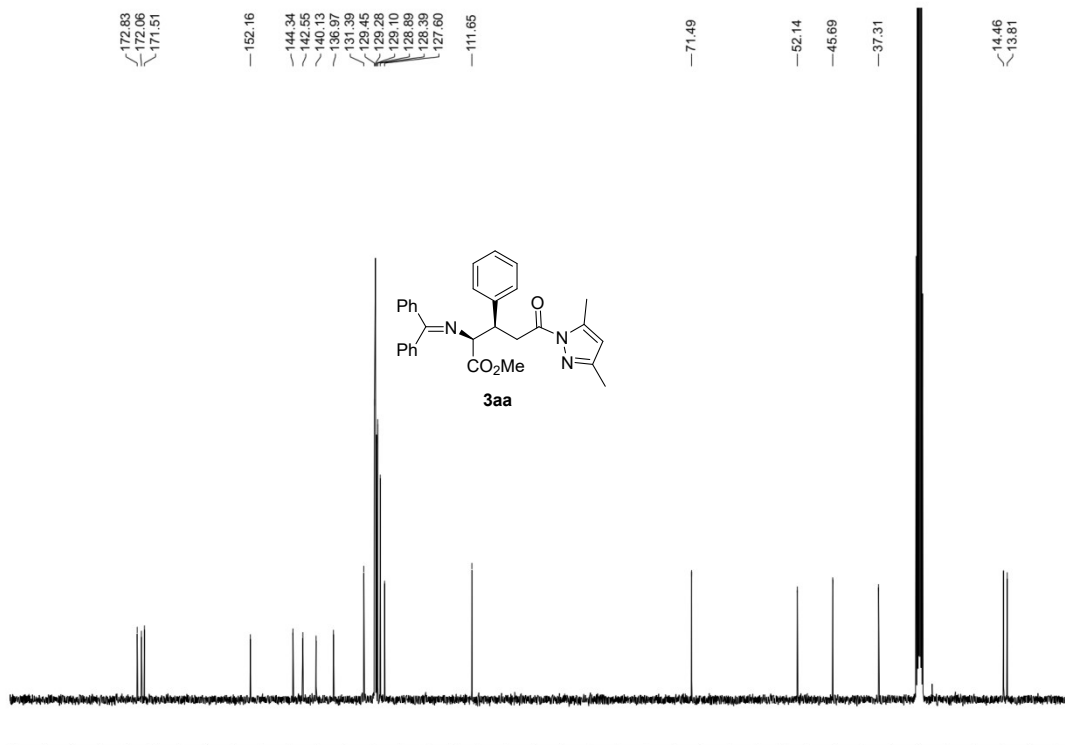



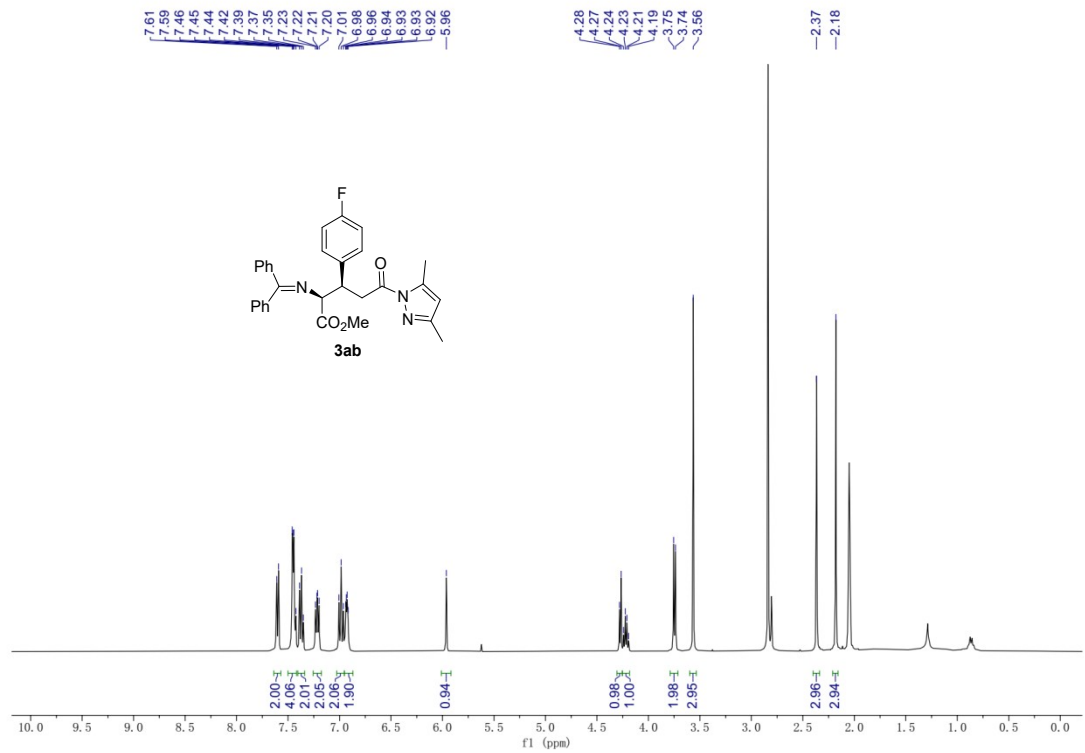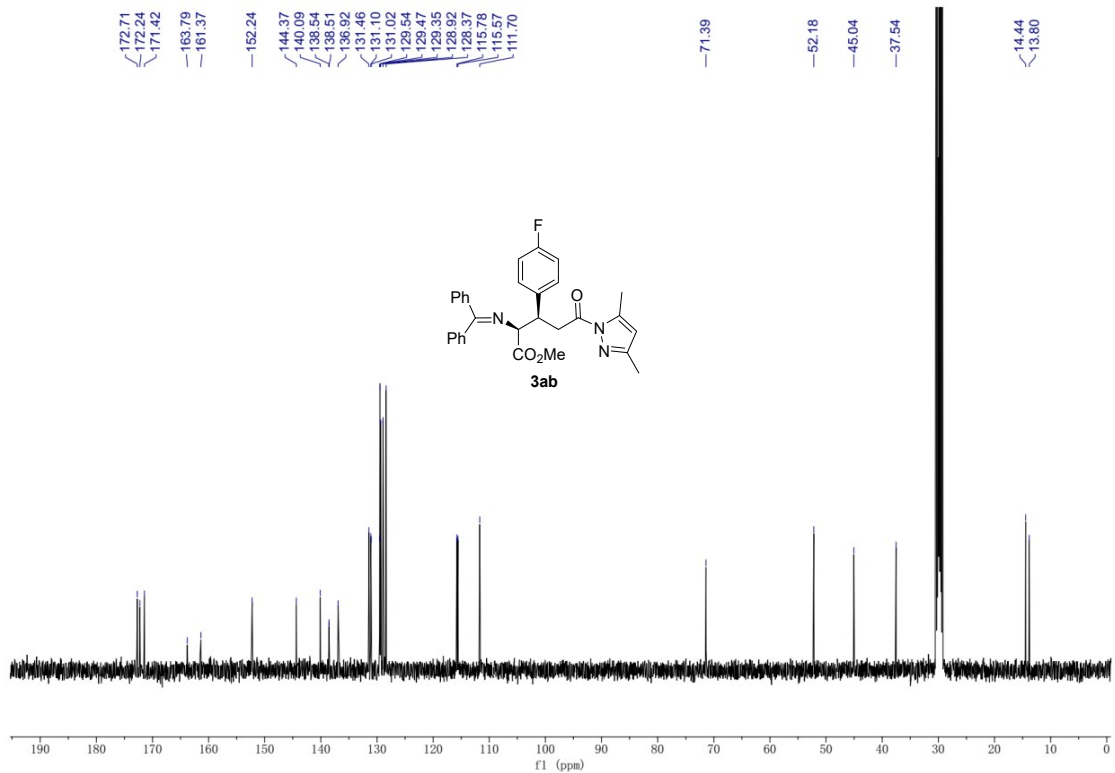

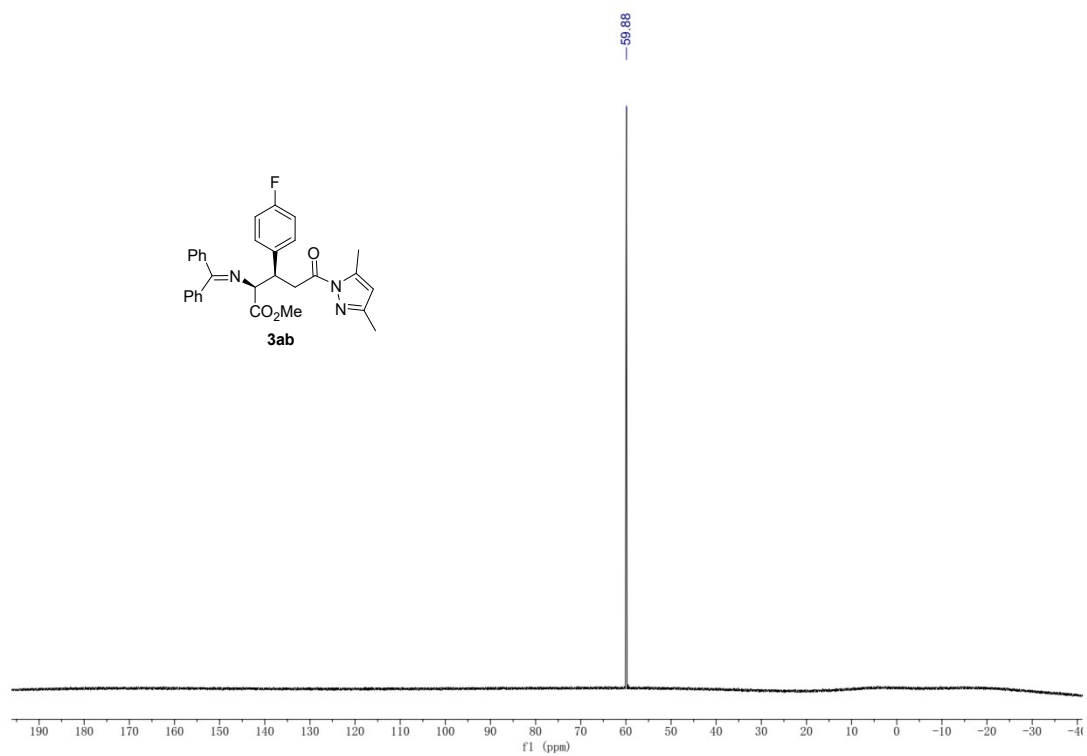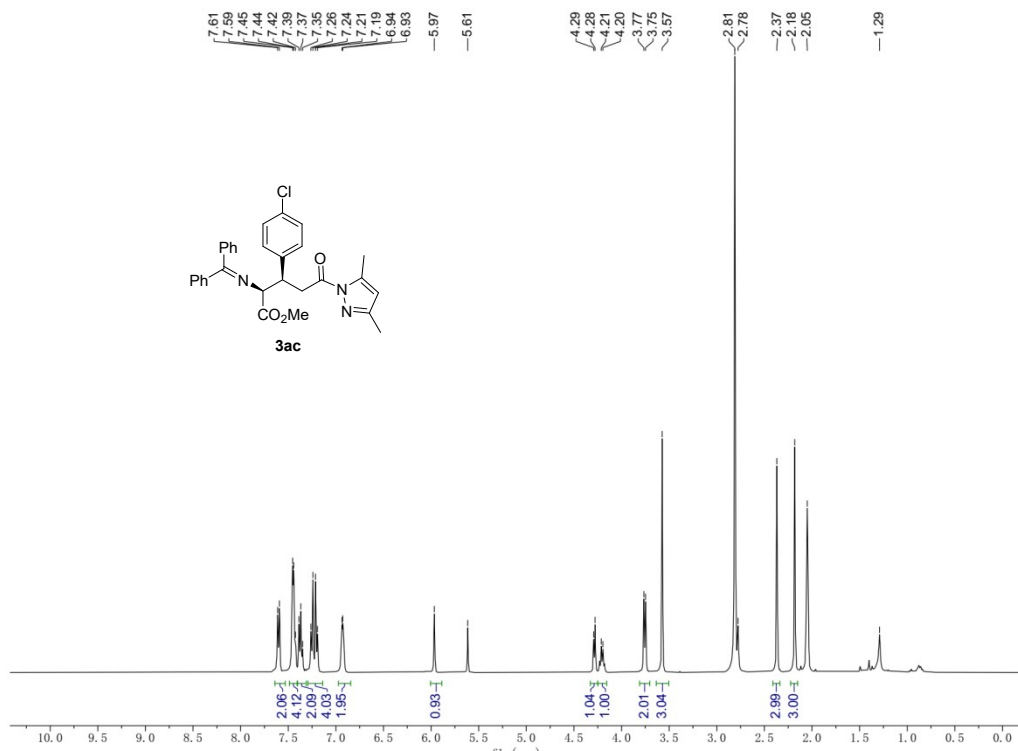

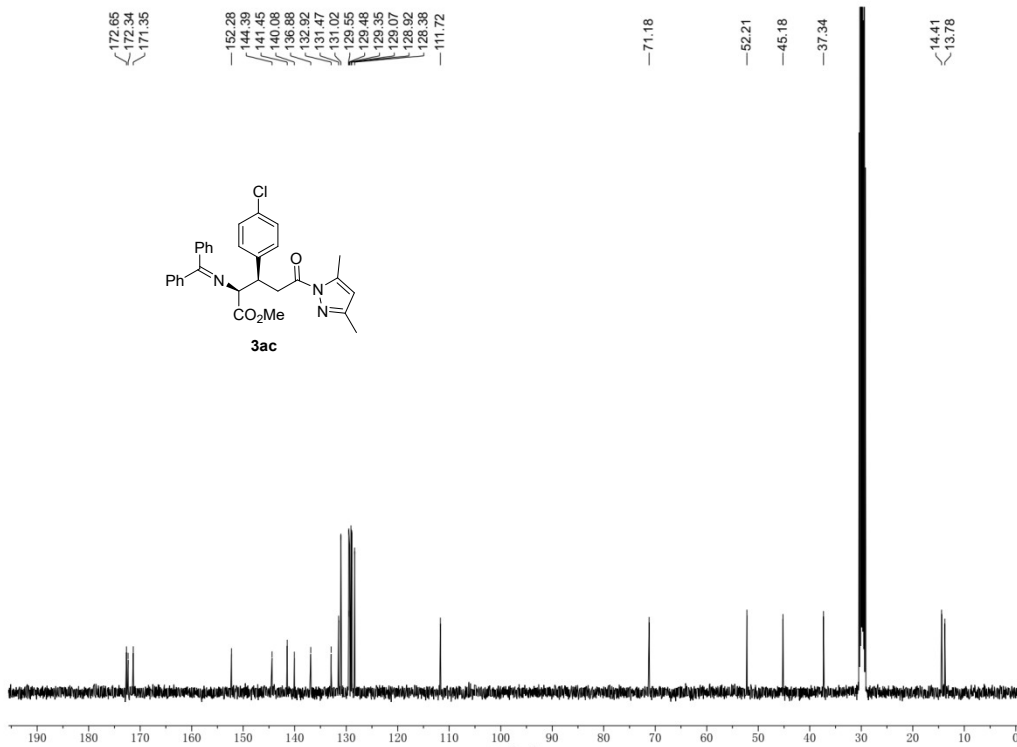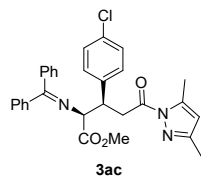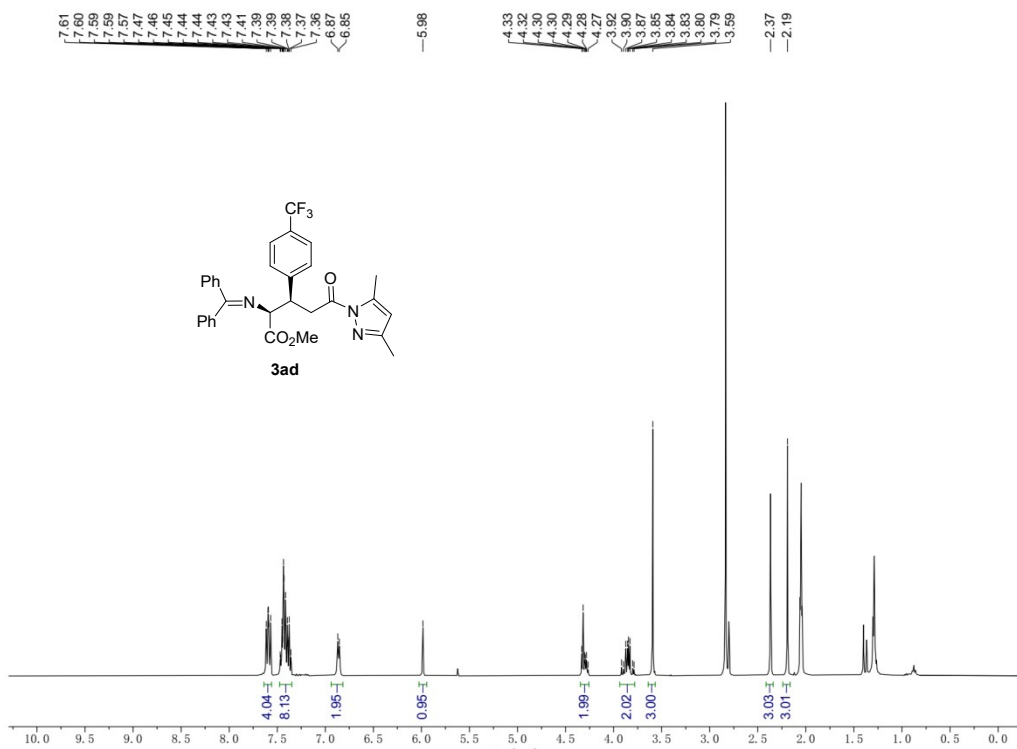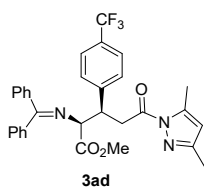

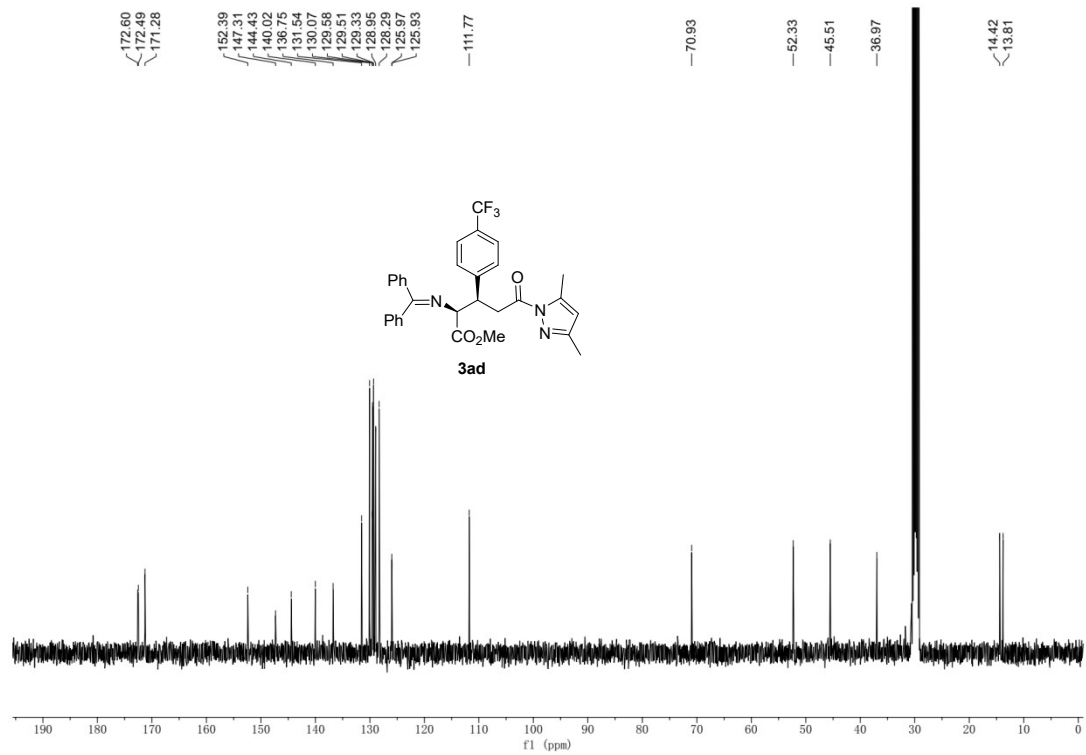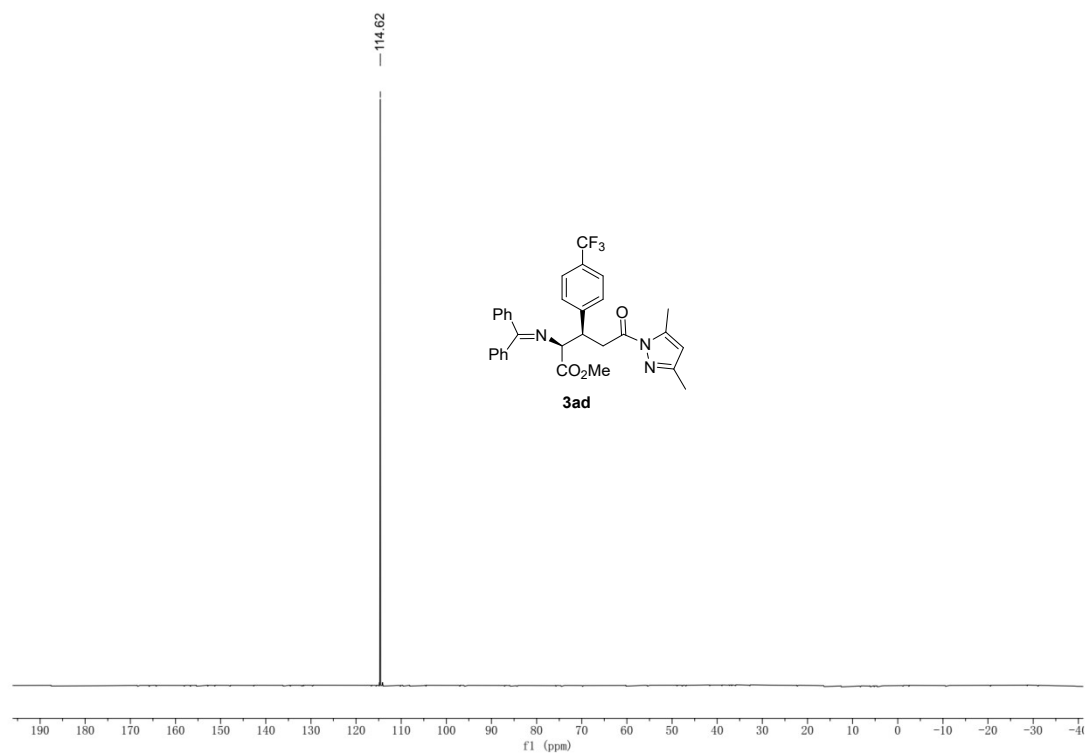





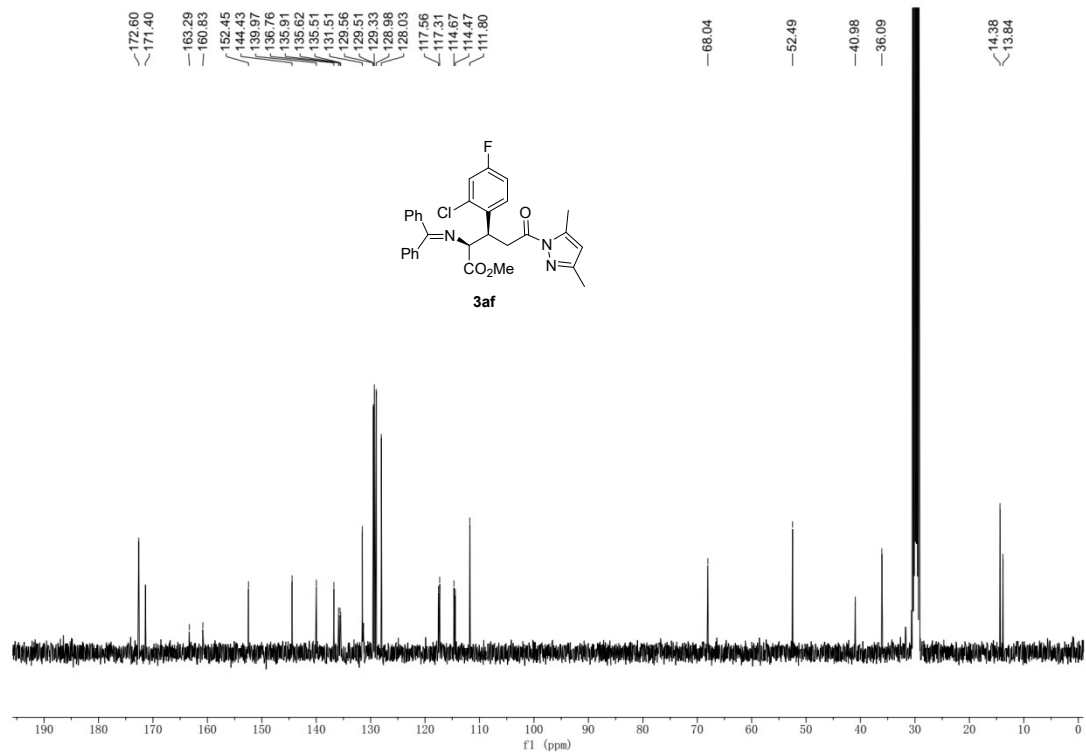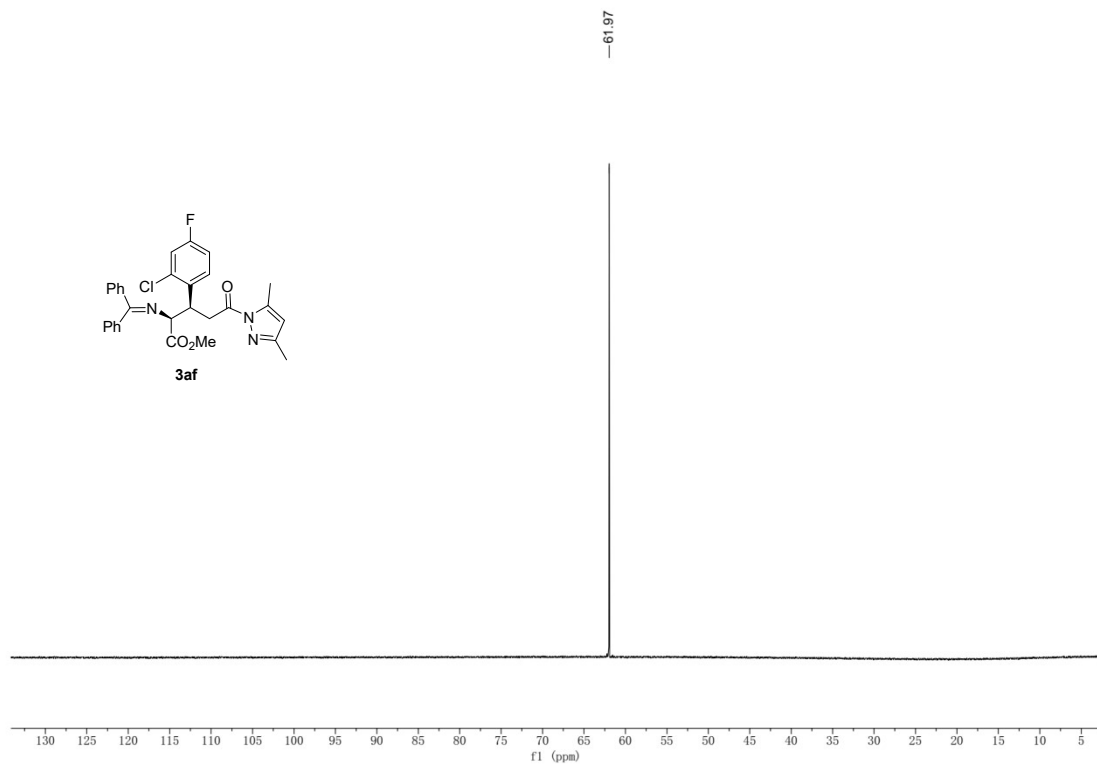

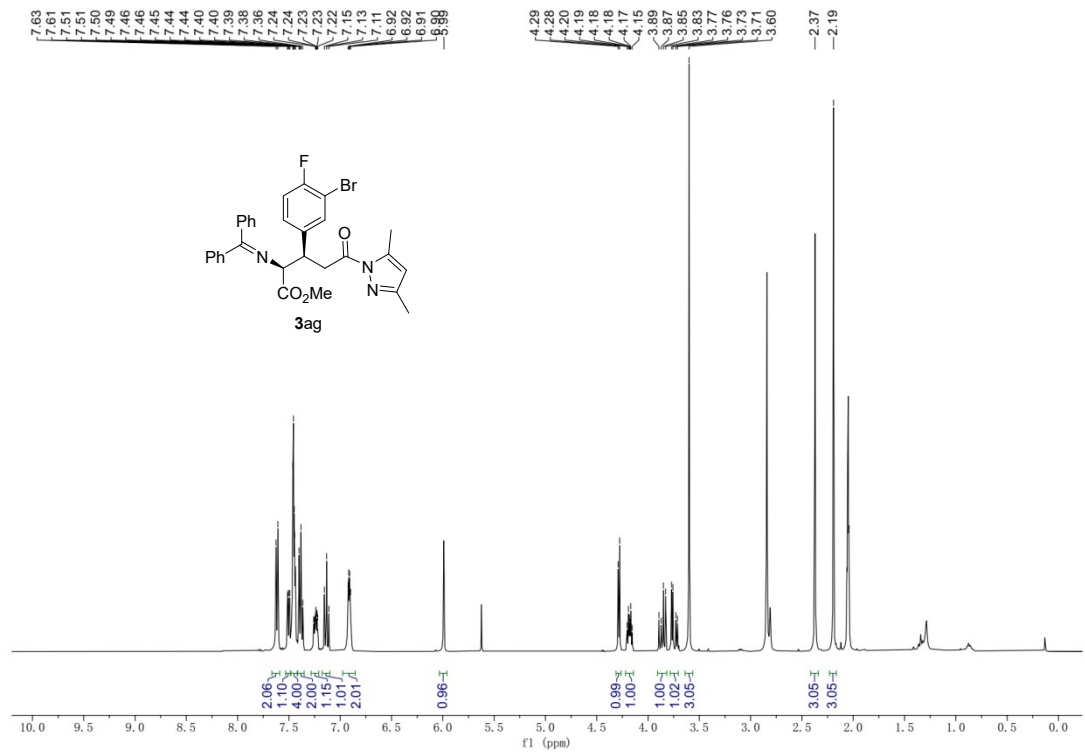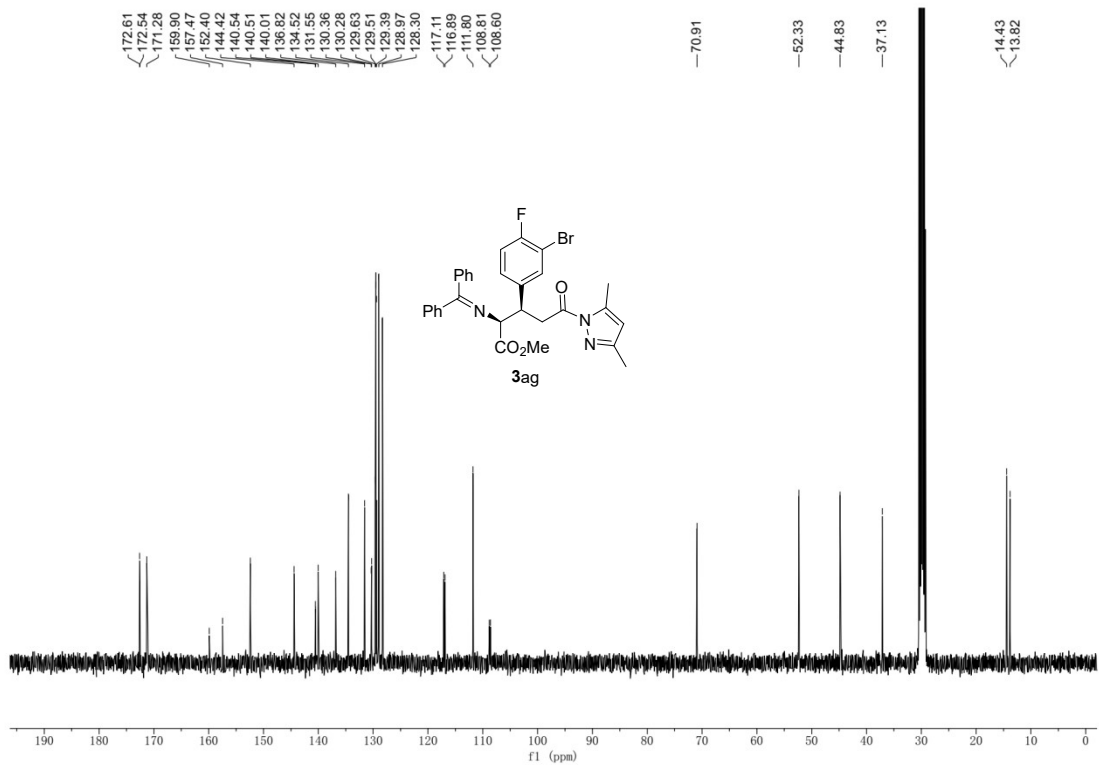





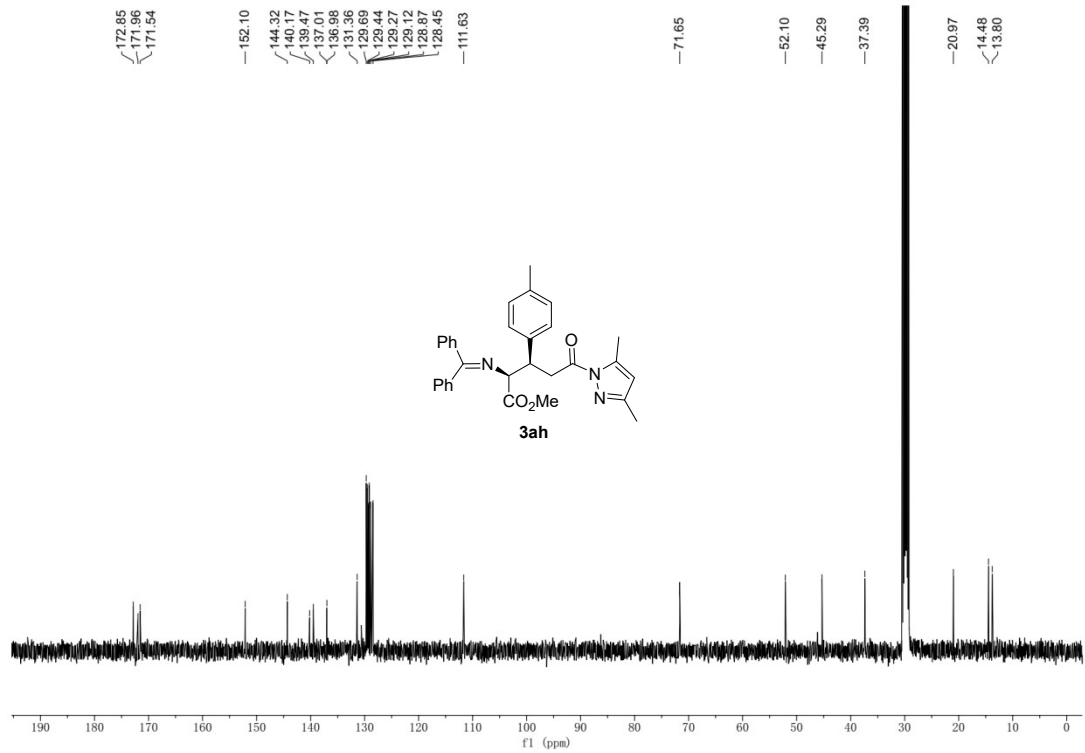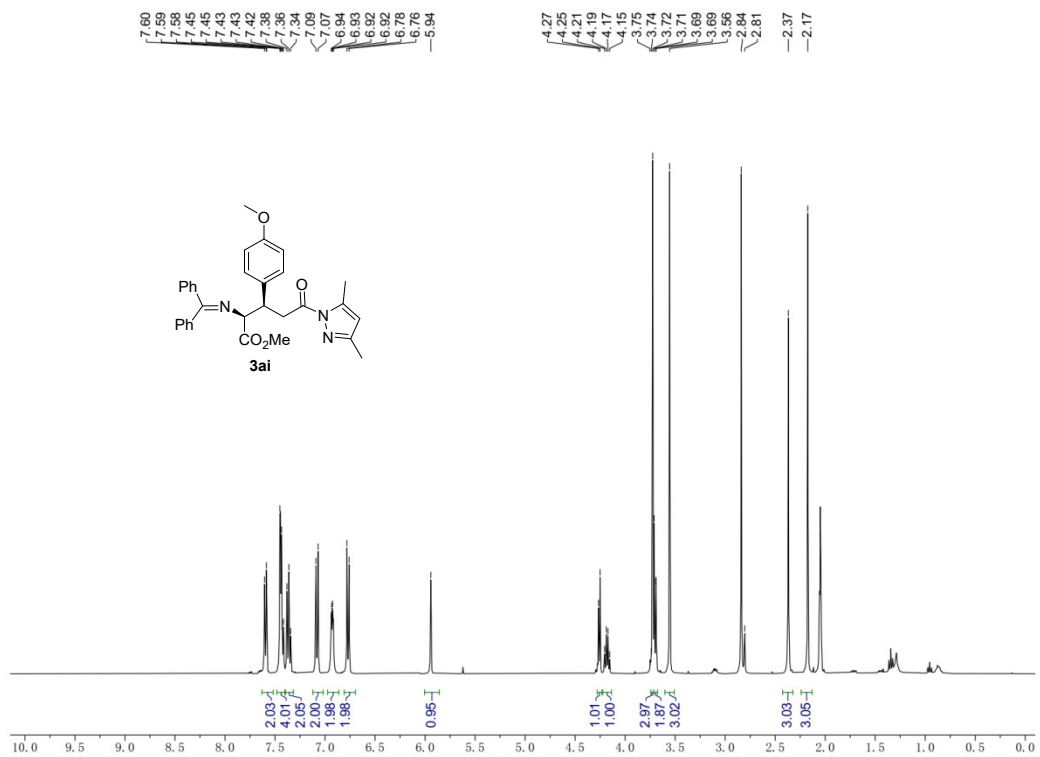

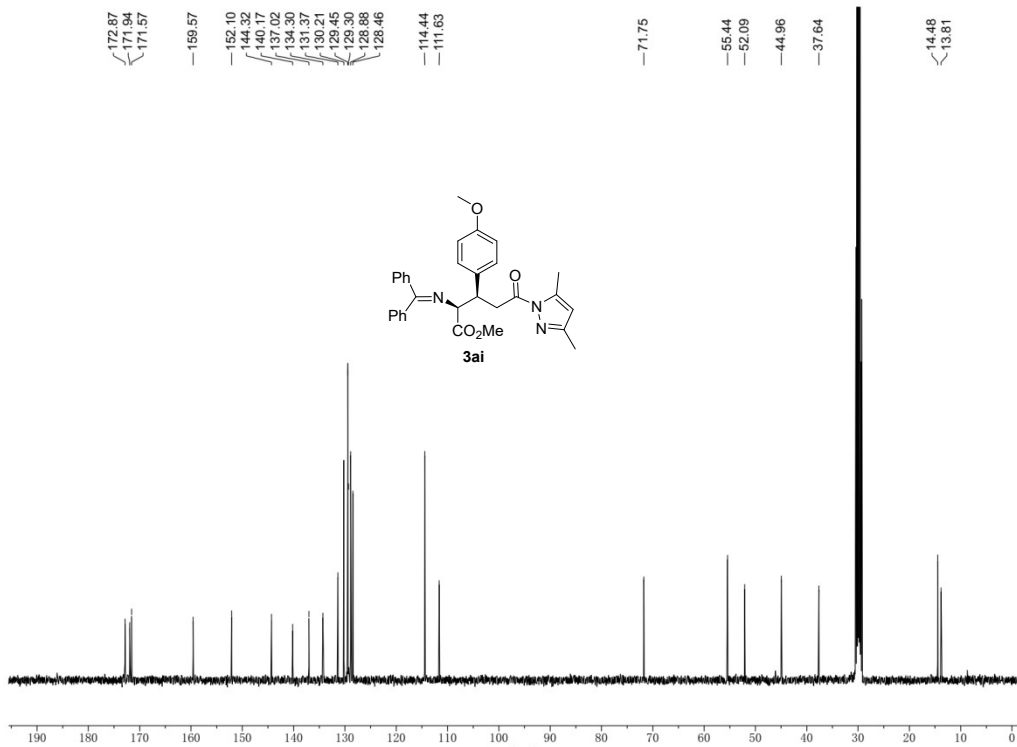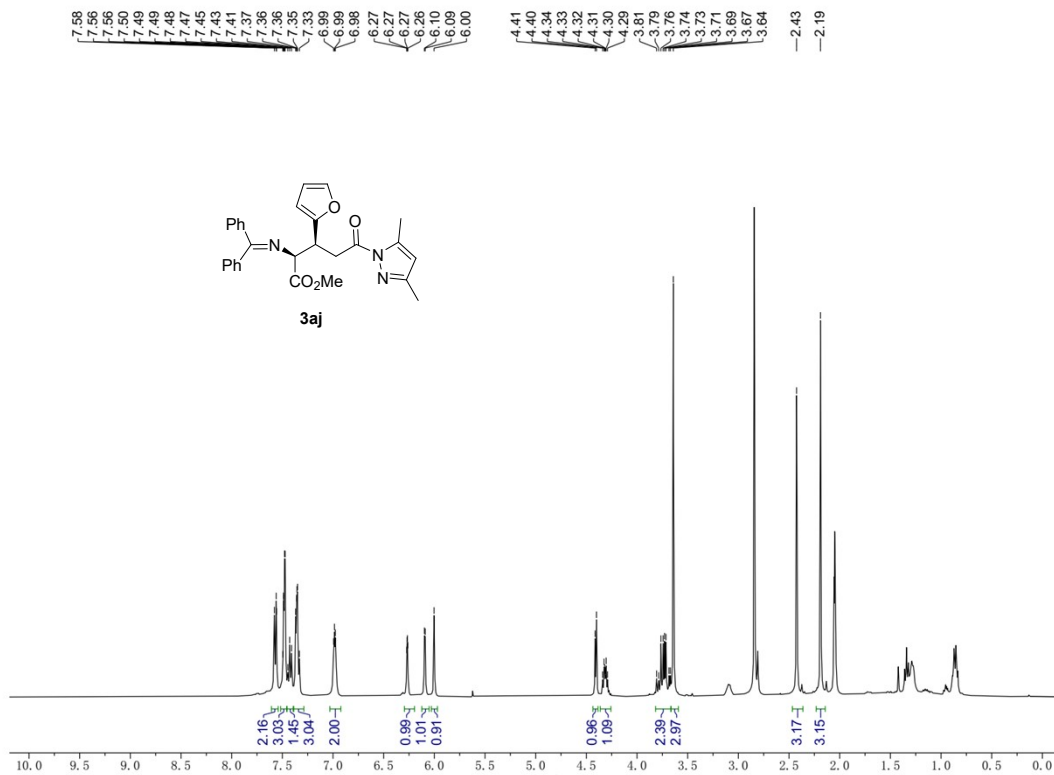

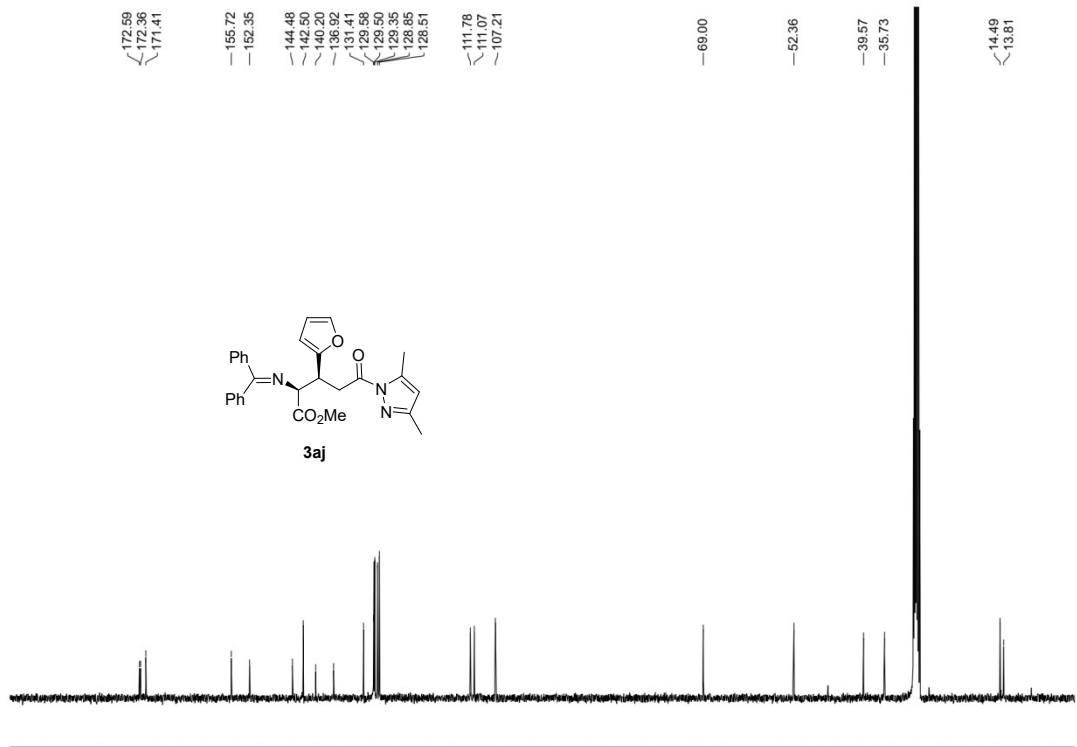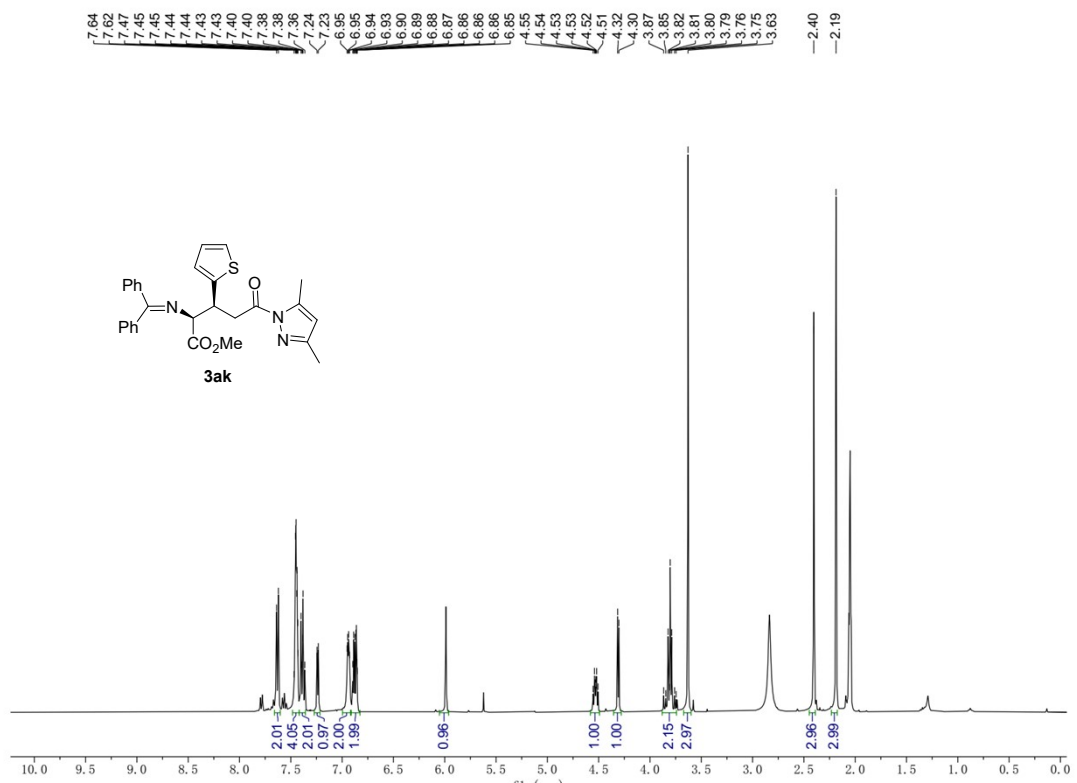

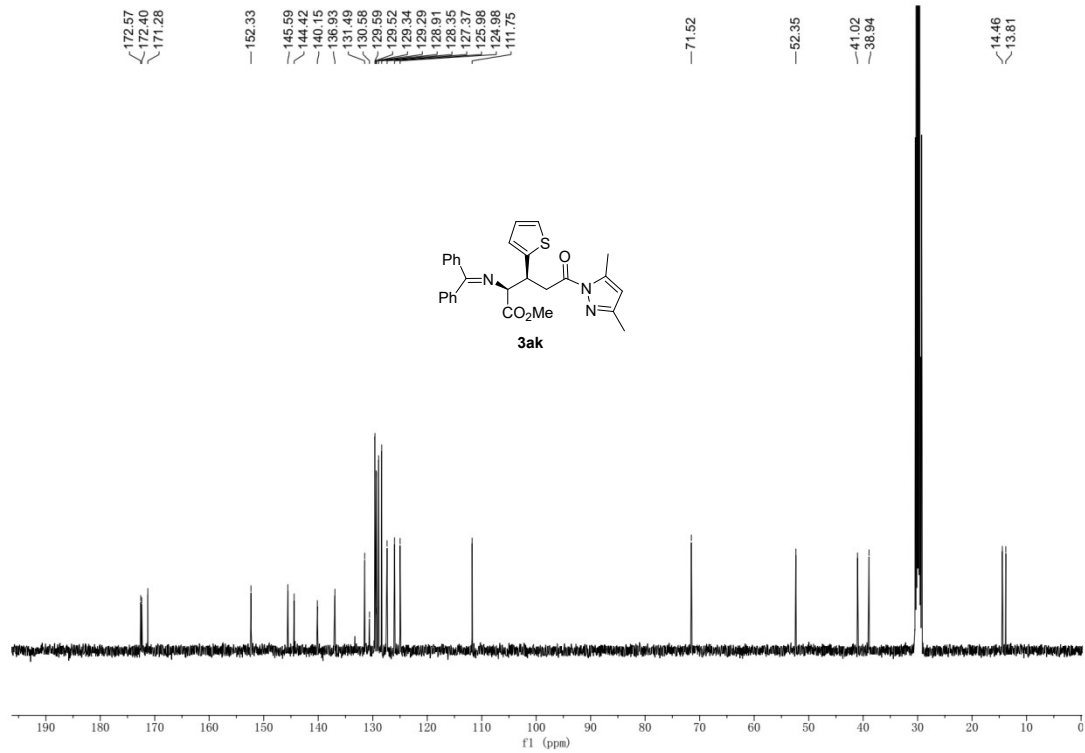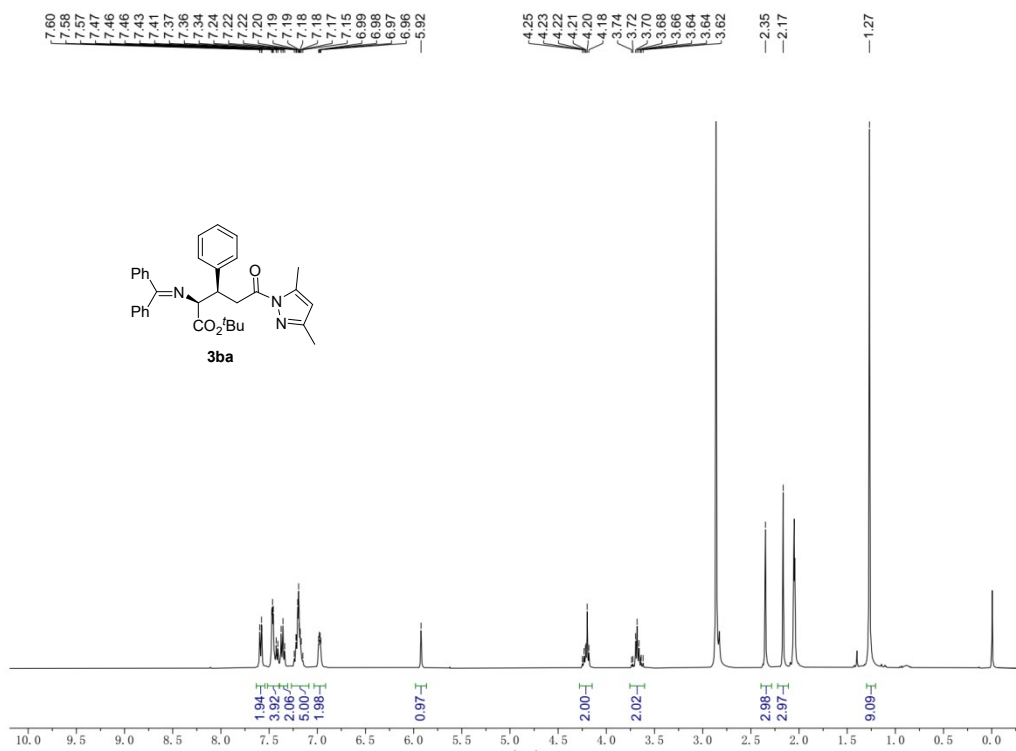

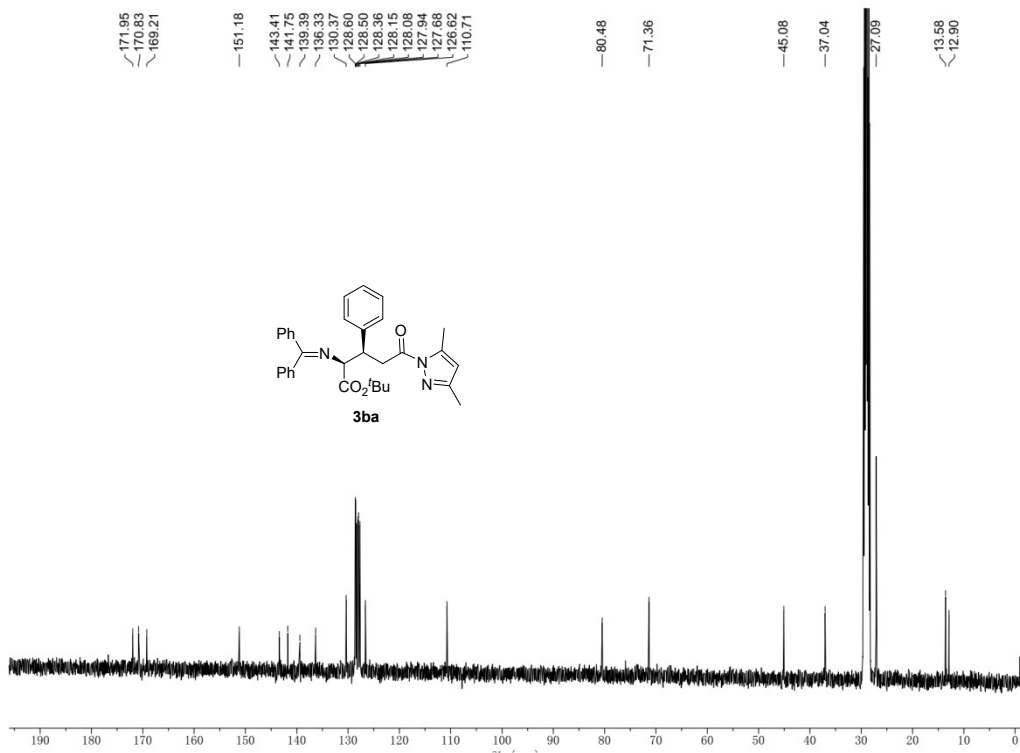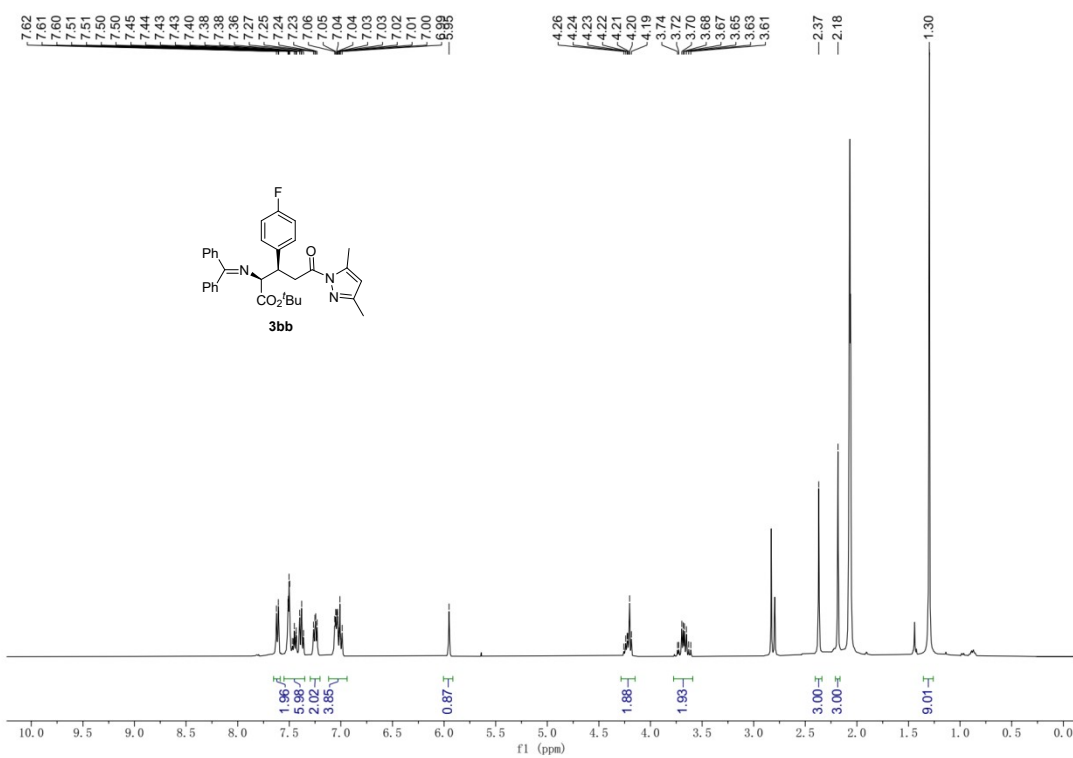

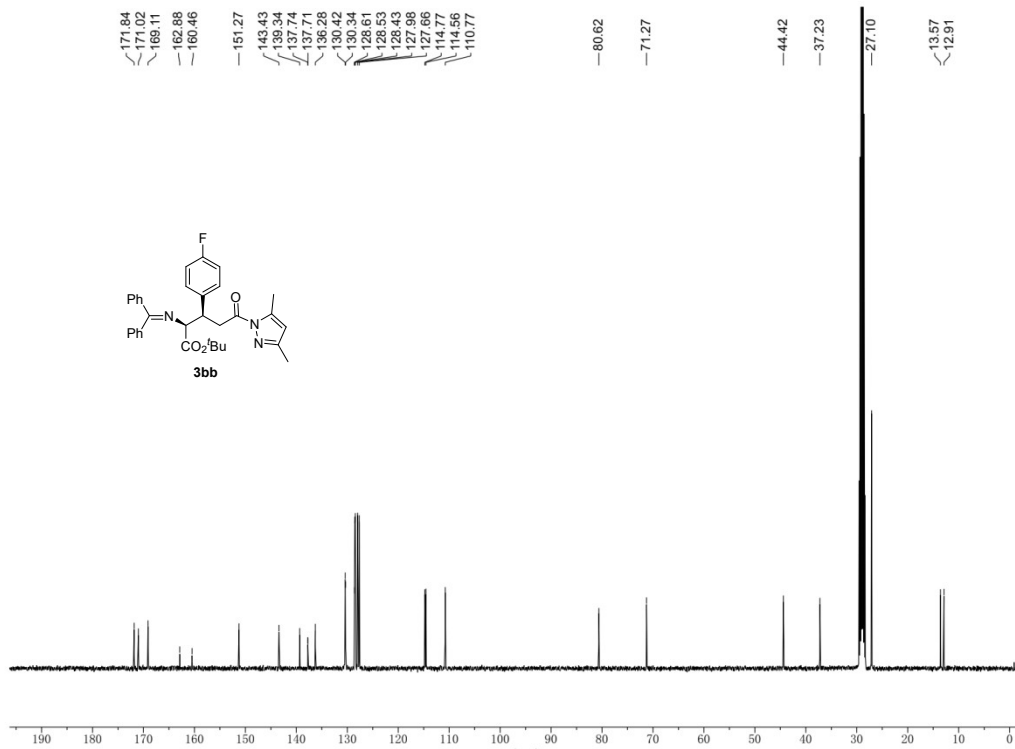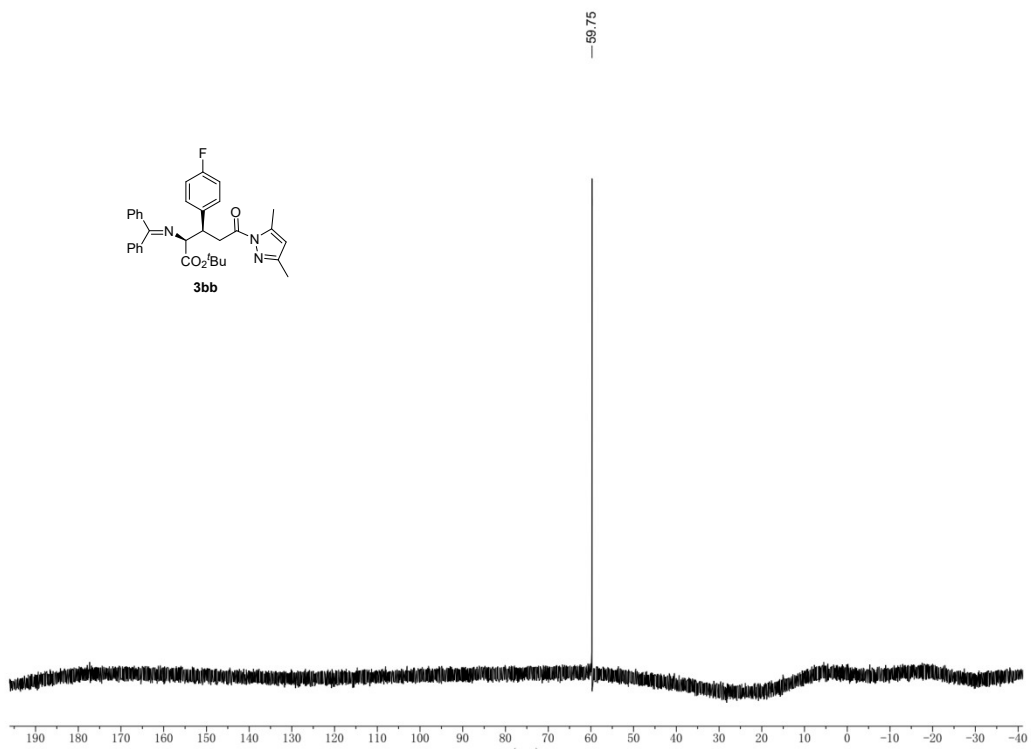

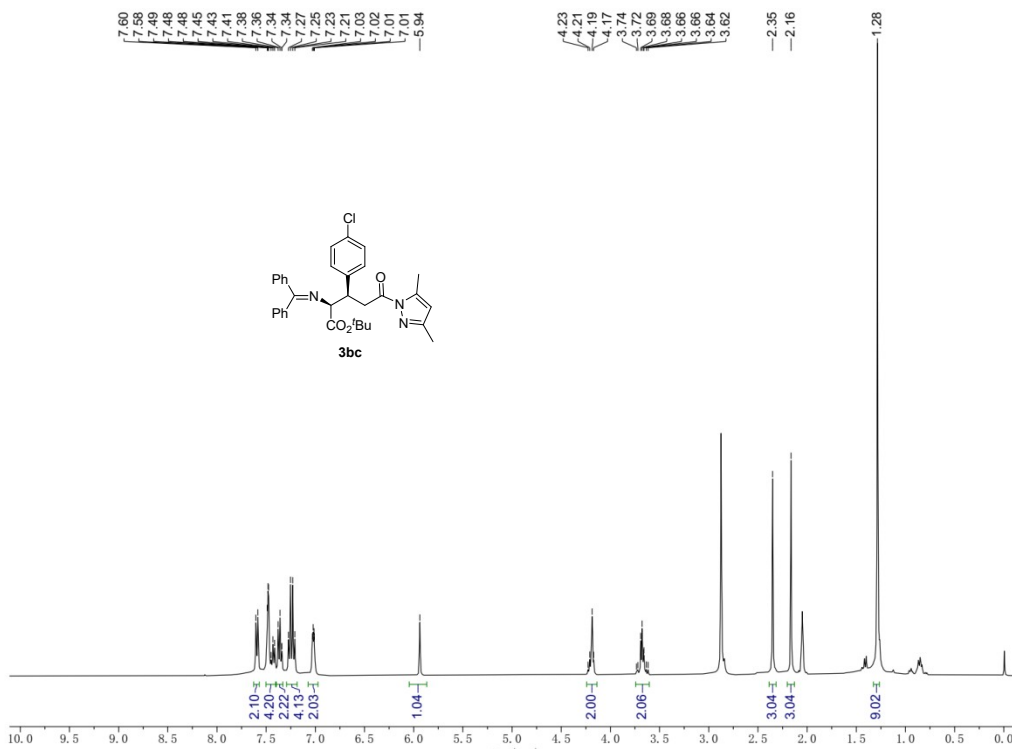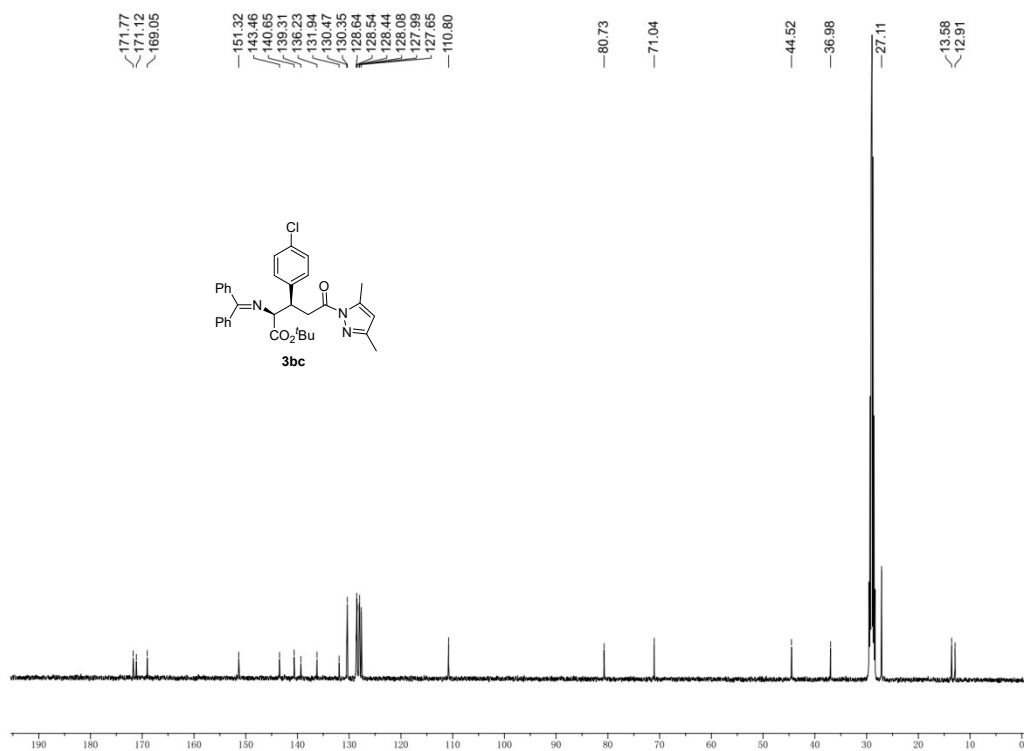



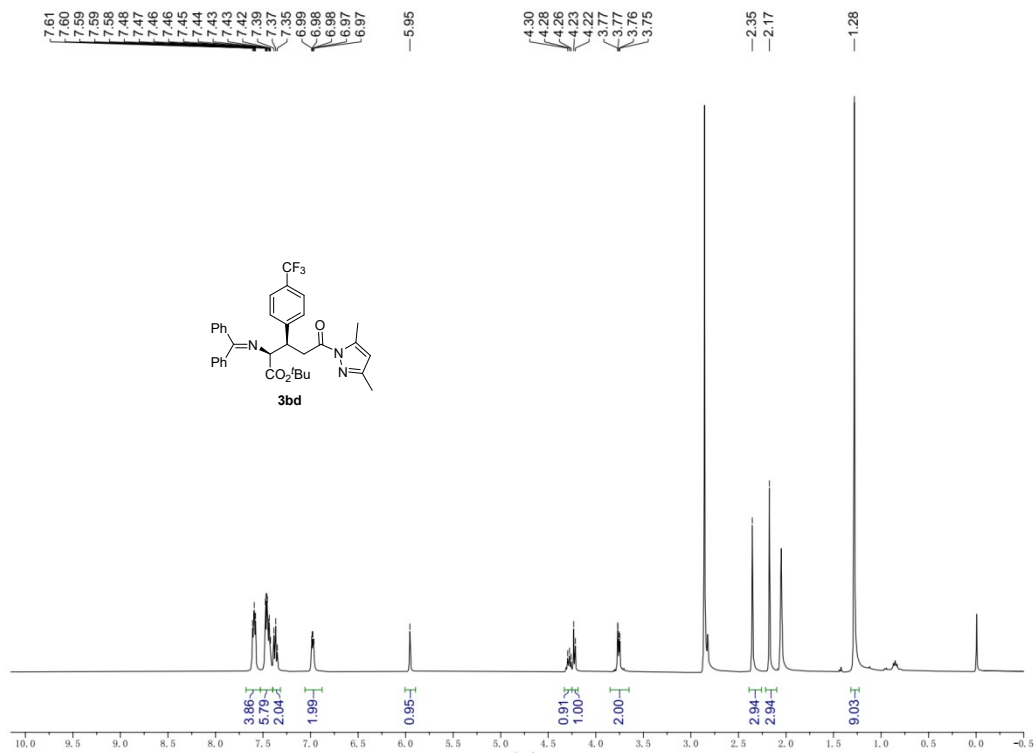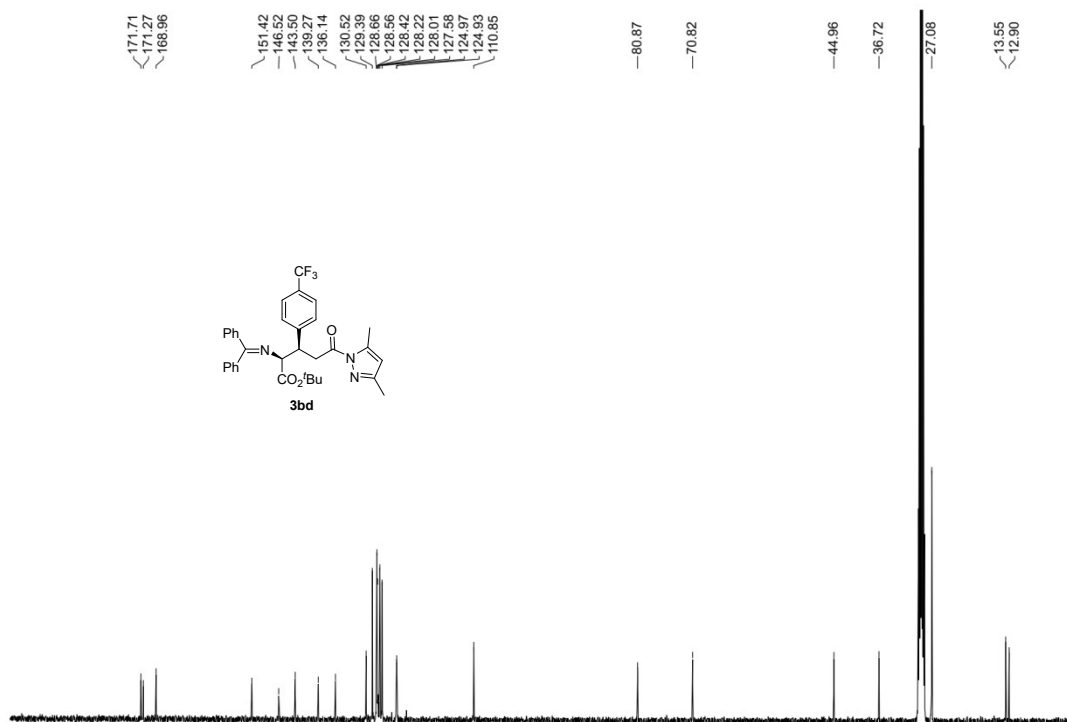

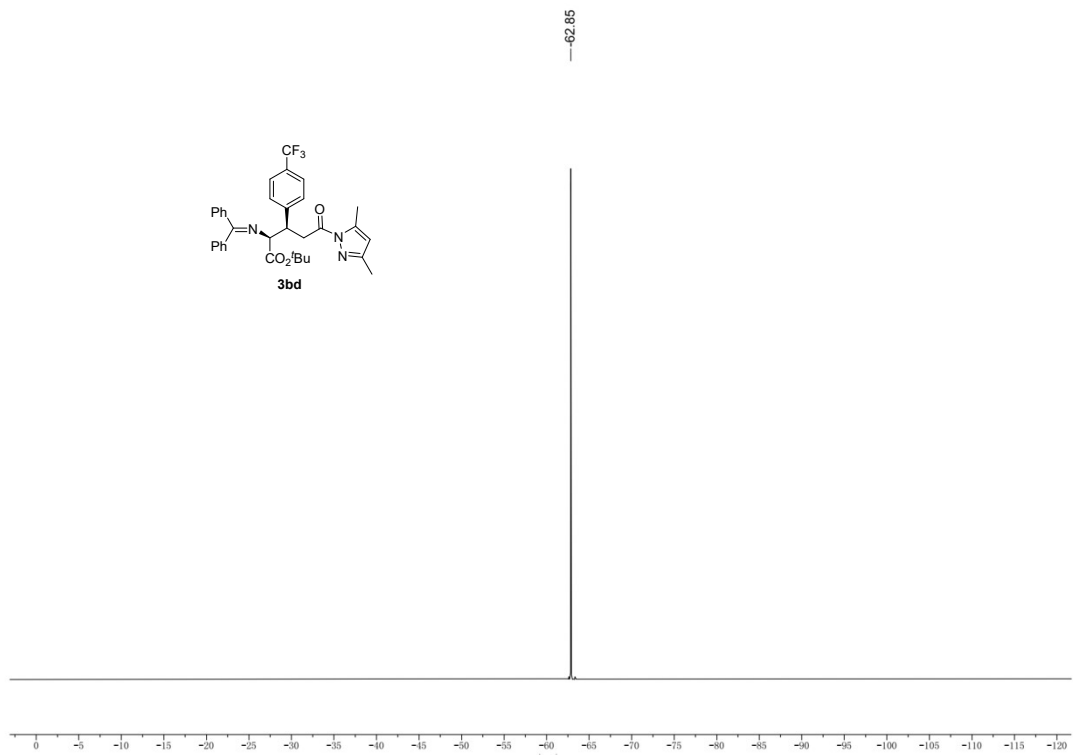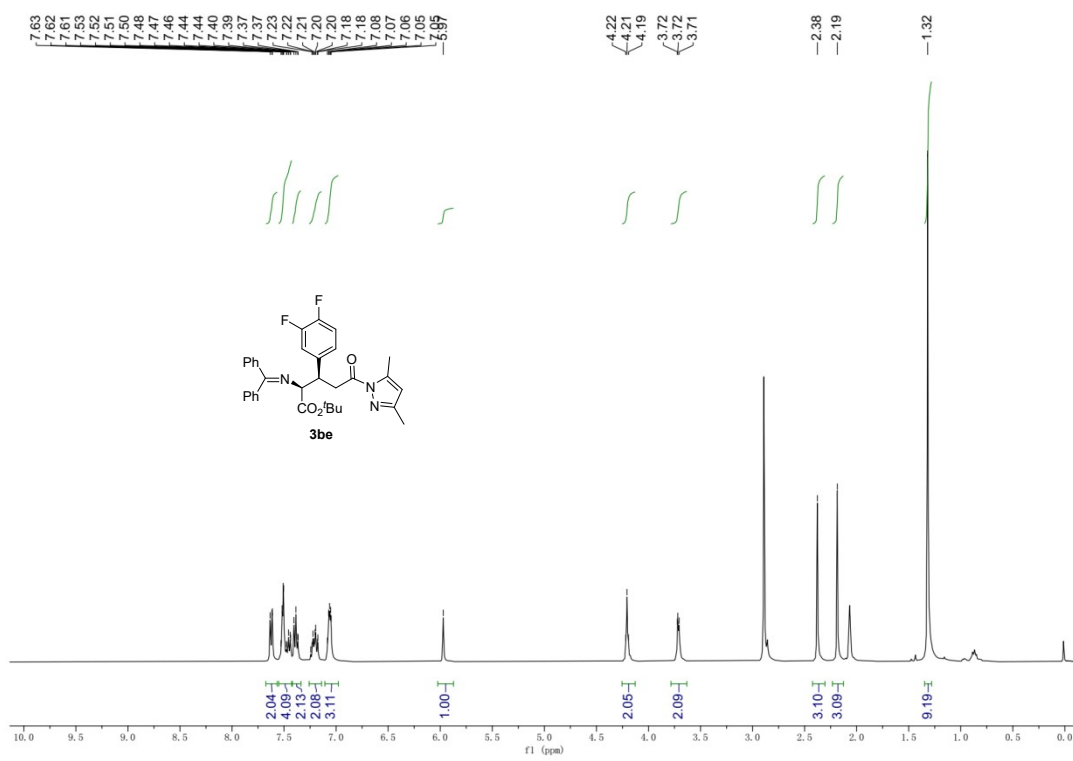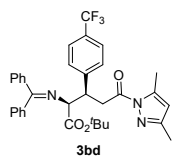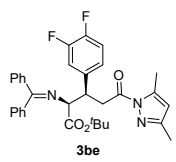

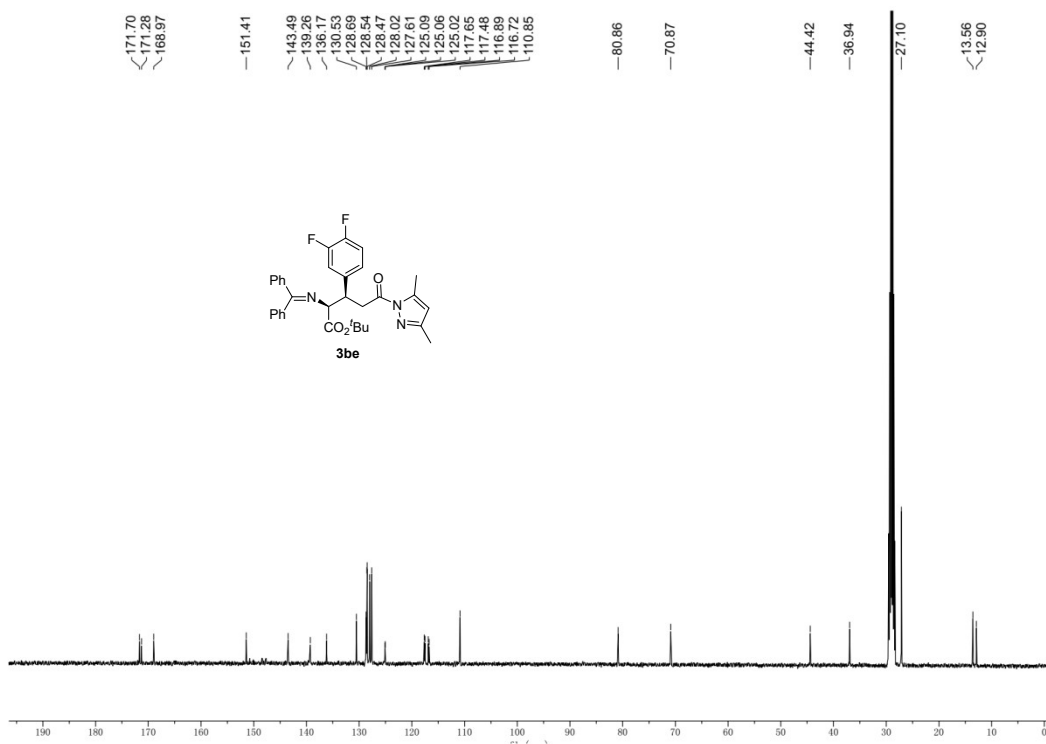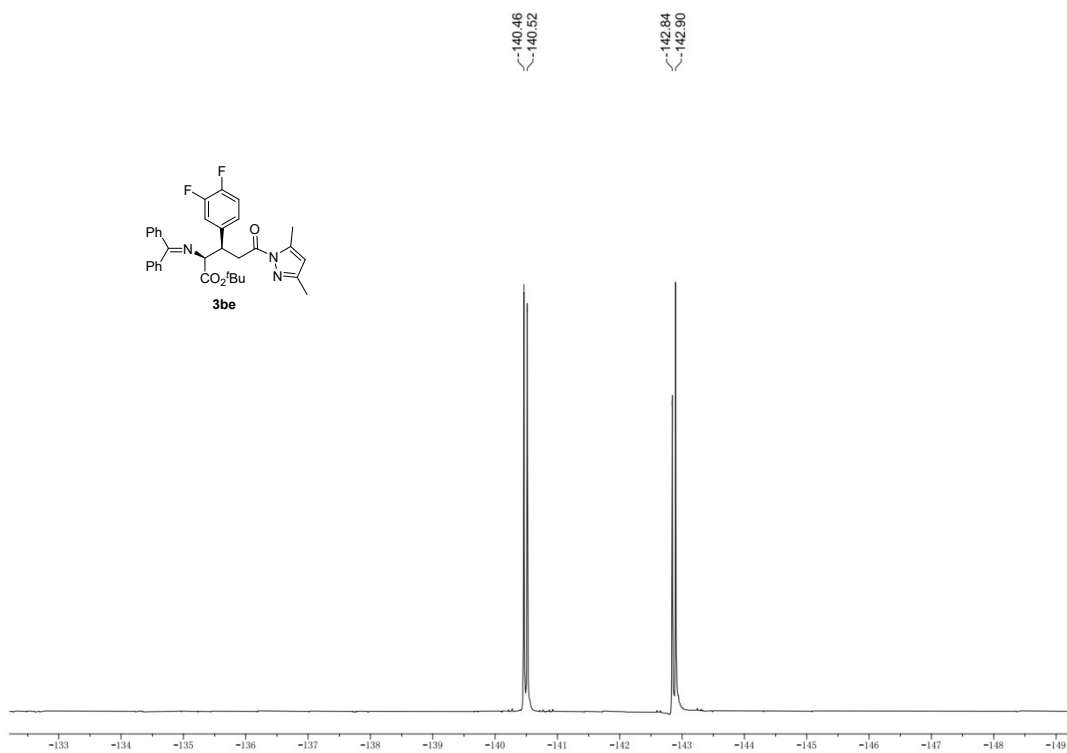

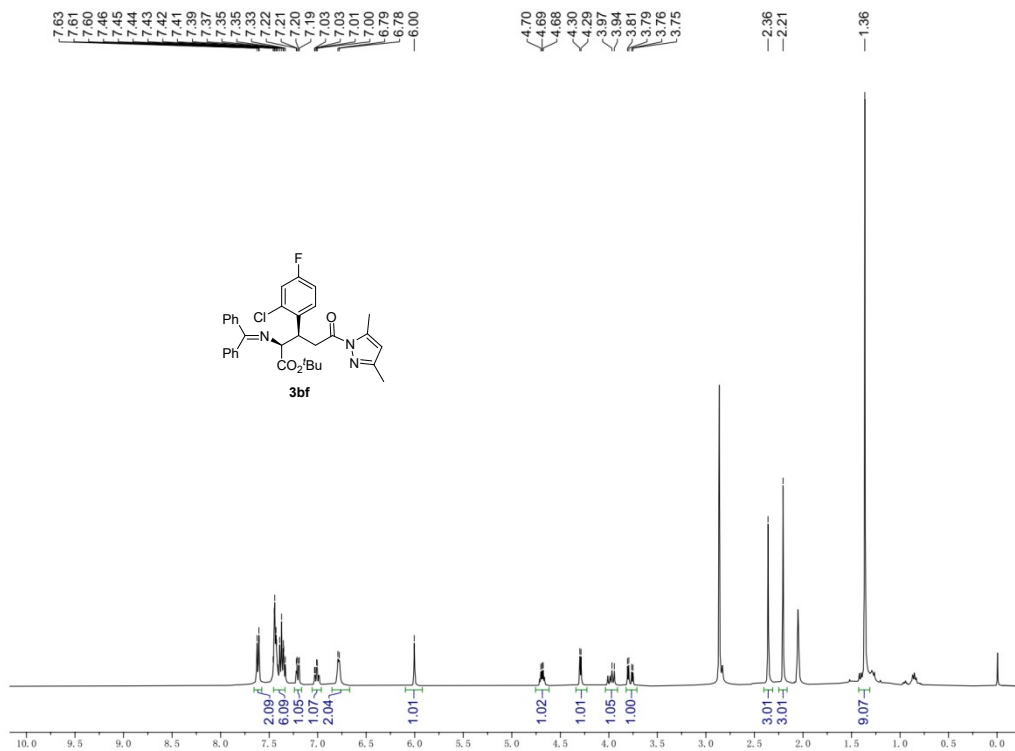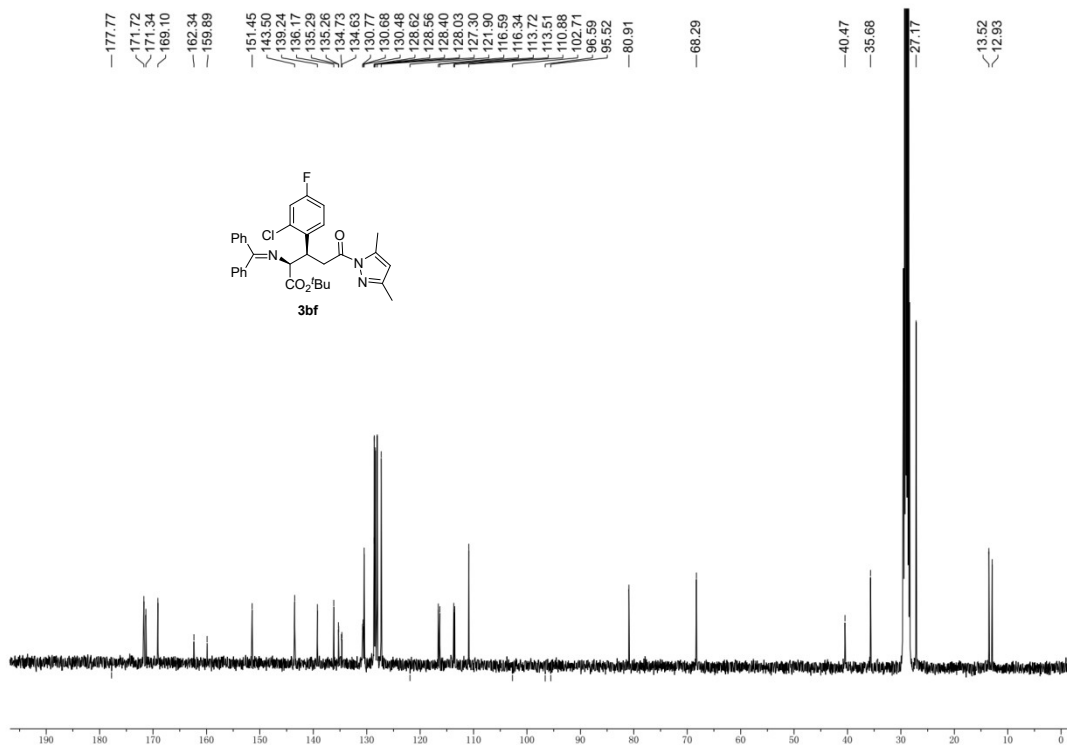

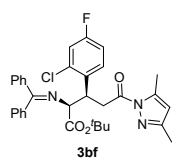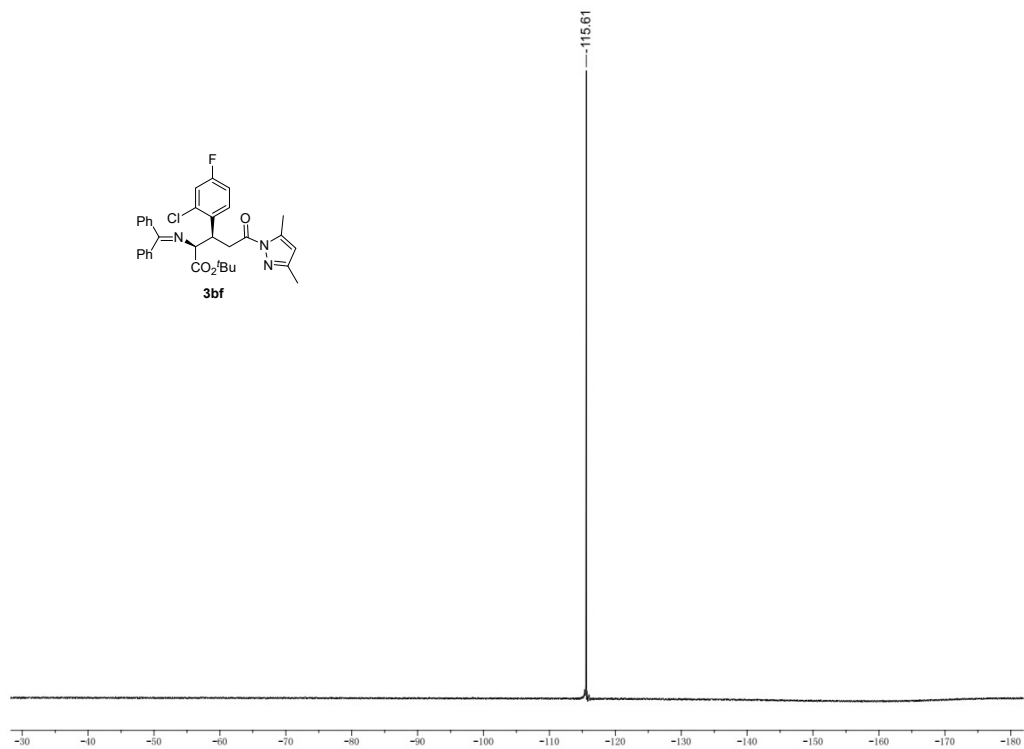

7.62  
 7.60  
 7.59  
 7.53  
 7.51  
 7.50  
 7.49  
 7.48  
 7.46  
 7.44  
 7.43  
 7.39  
 7.37  
 7.35  
 7.25  
 7.24  
 7.23  
 7.17  
 7.15  
 7.13  
 7.03  
 7.03  
 7.02  
 7.01  
 6.07  
 -5.96

4.19  
 4.19  
 4.18  
 4.17  
 4.16  
 3.73  
 3.72  
 3.71  
 3.70  
 3.70  
 3.66  
 3.67  
 3.66  
 2.38  
 2.36  
 2.17  
 1.30

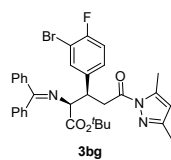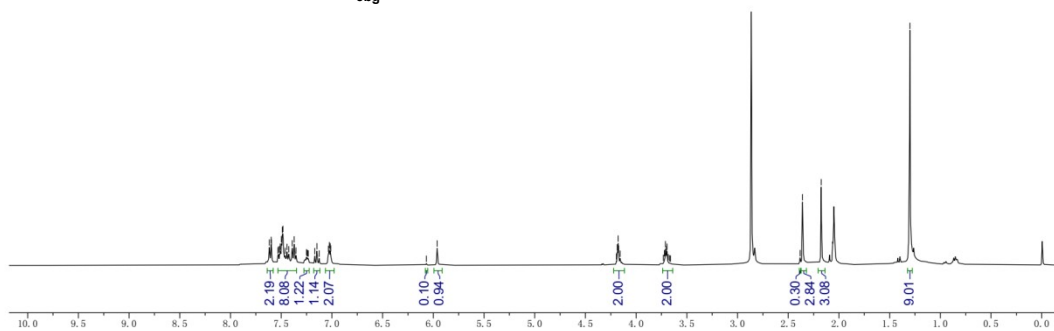

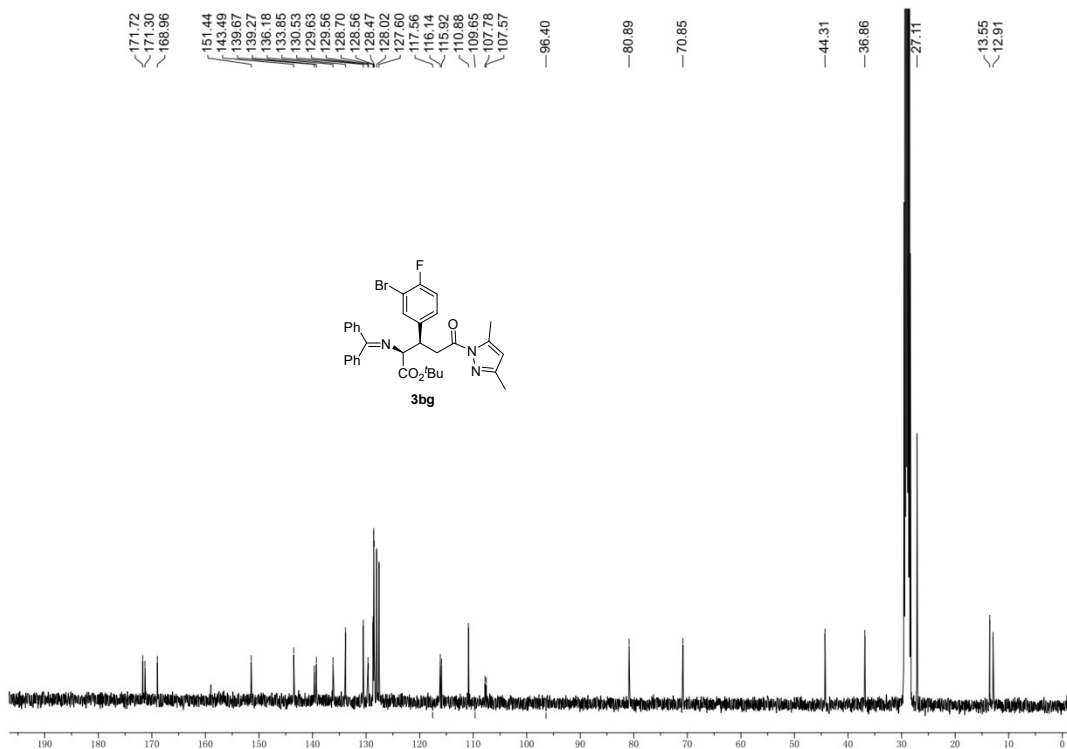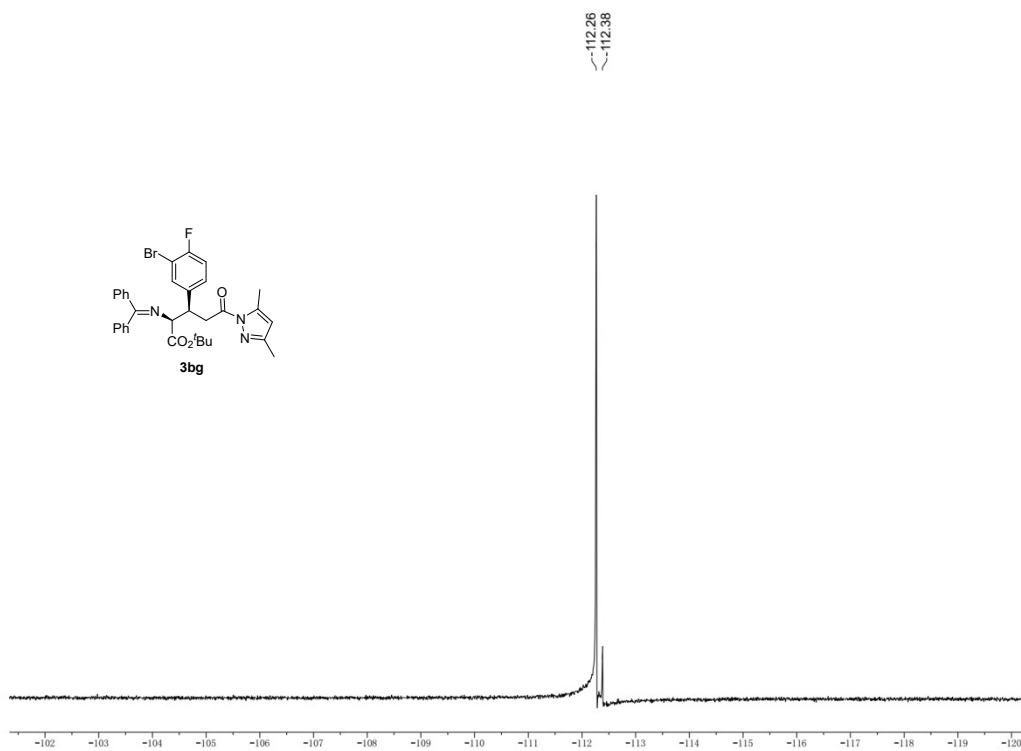

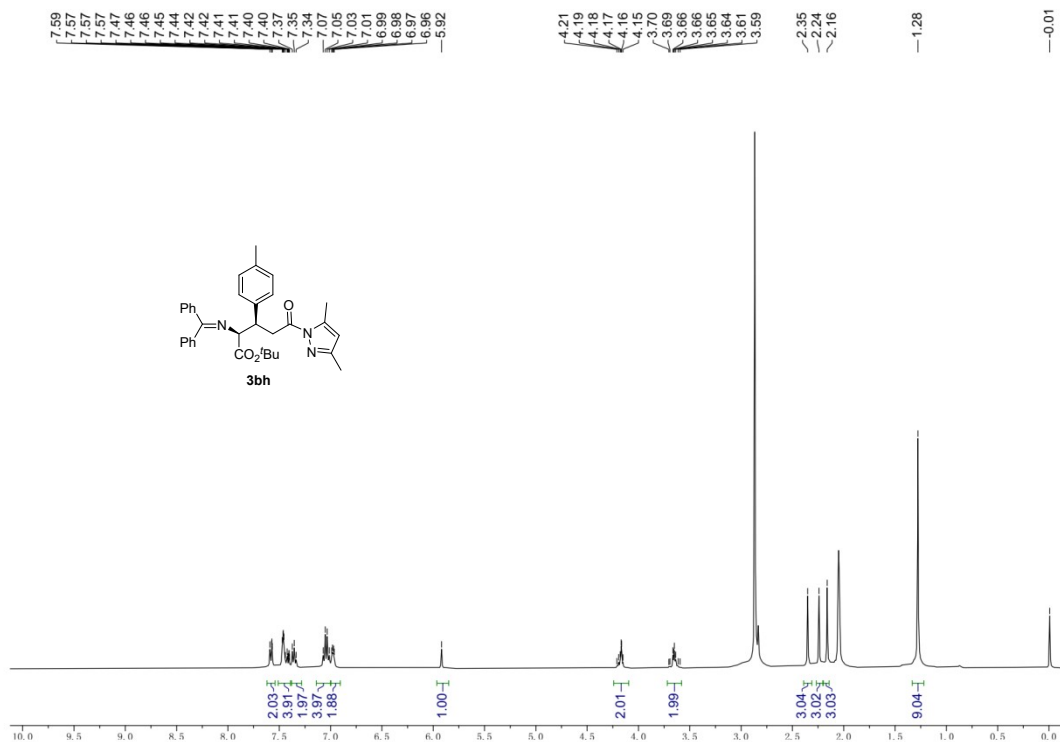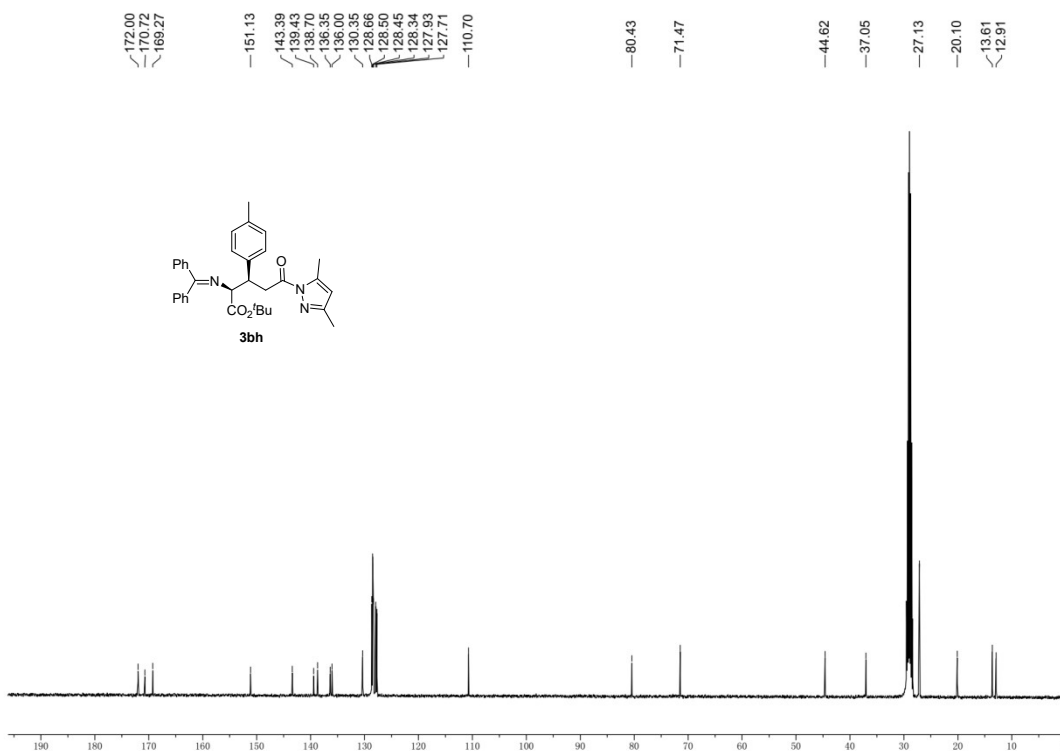

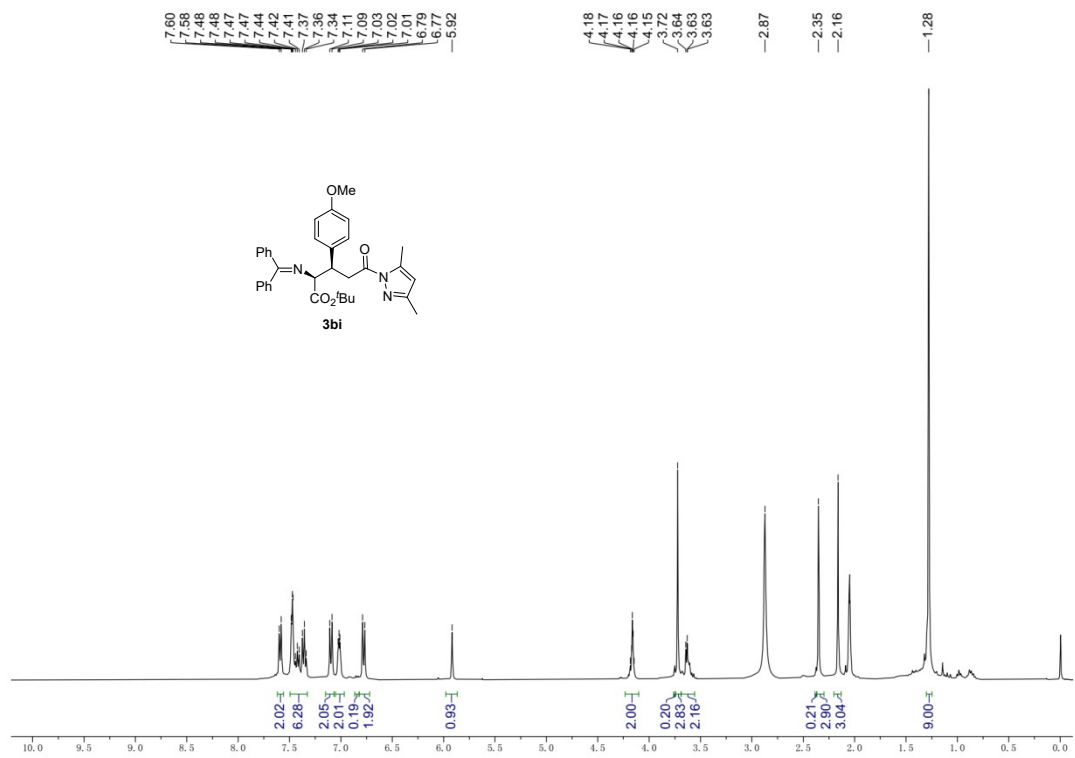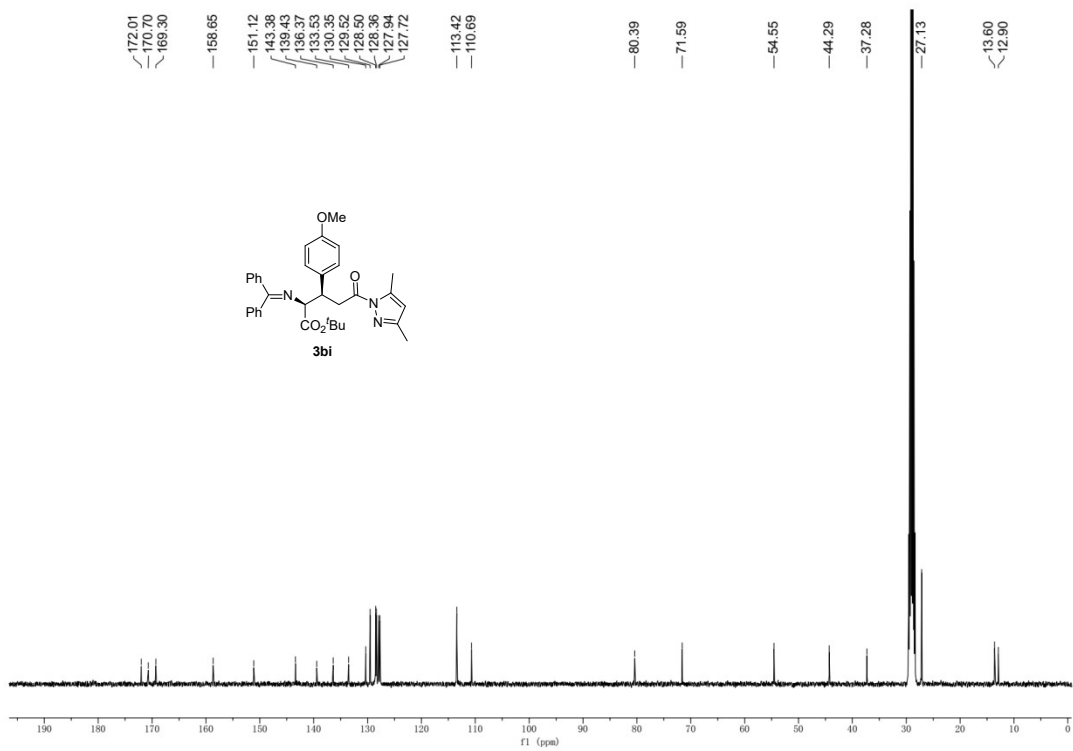



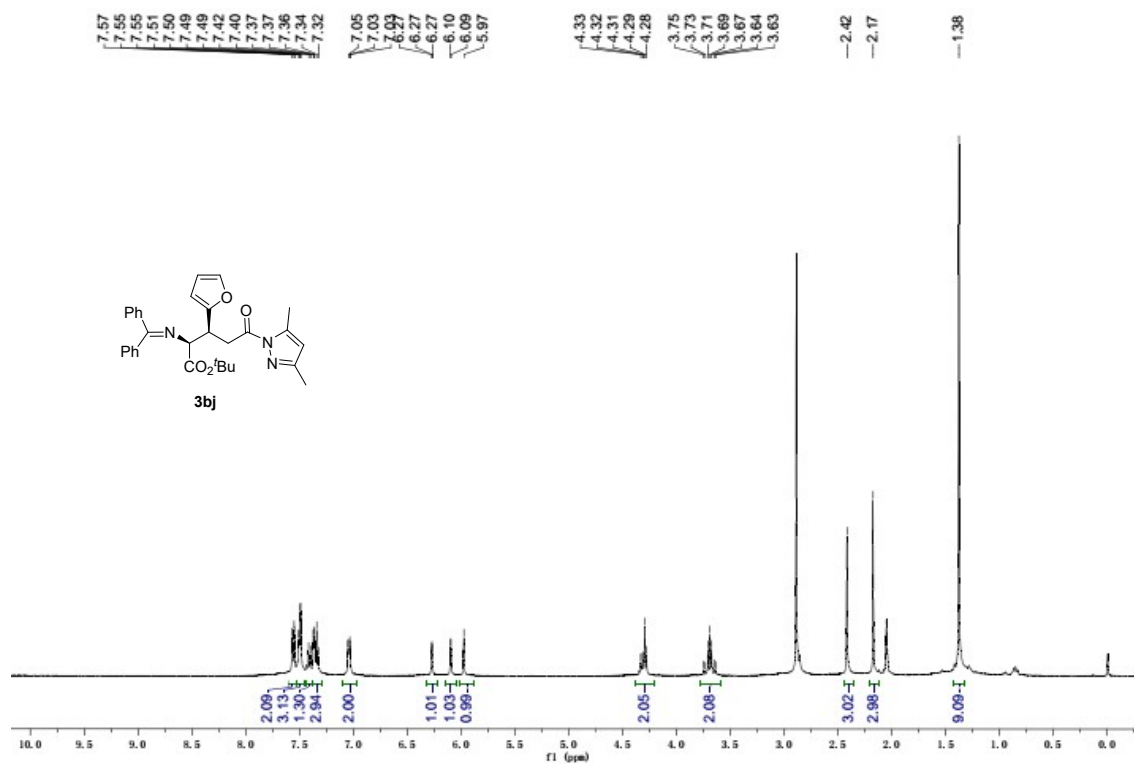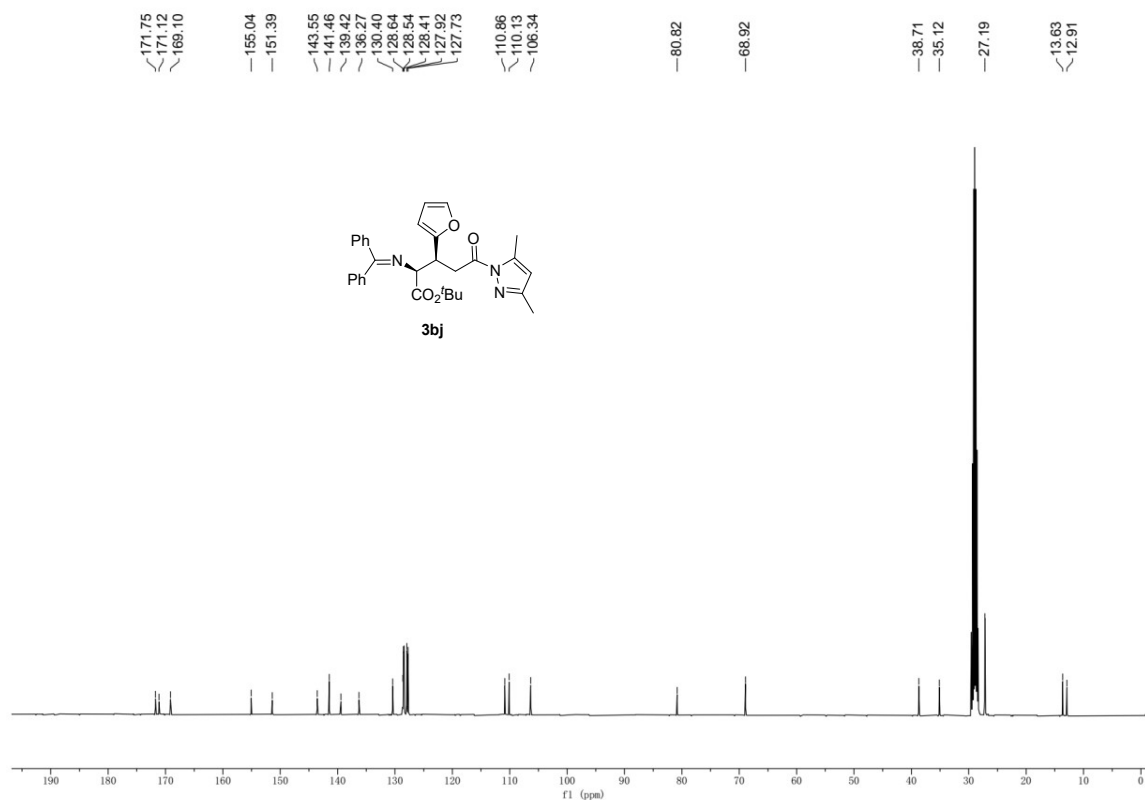

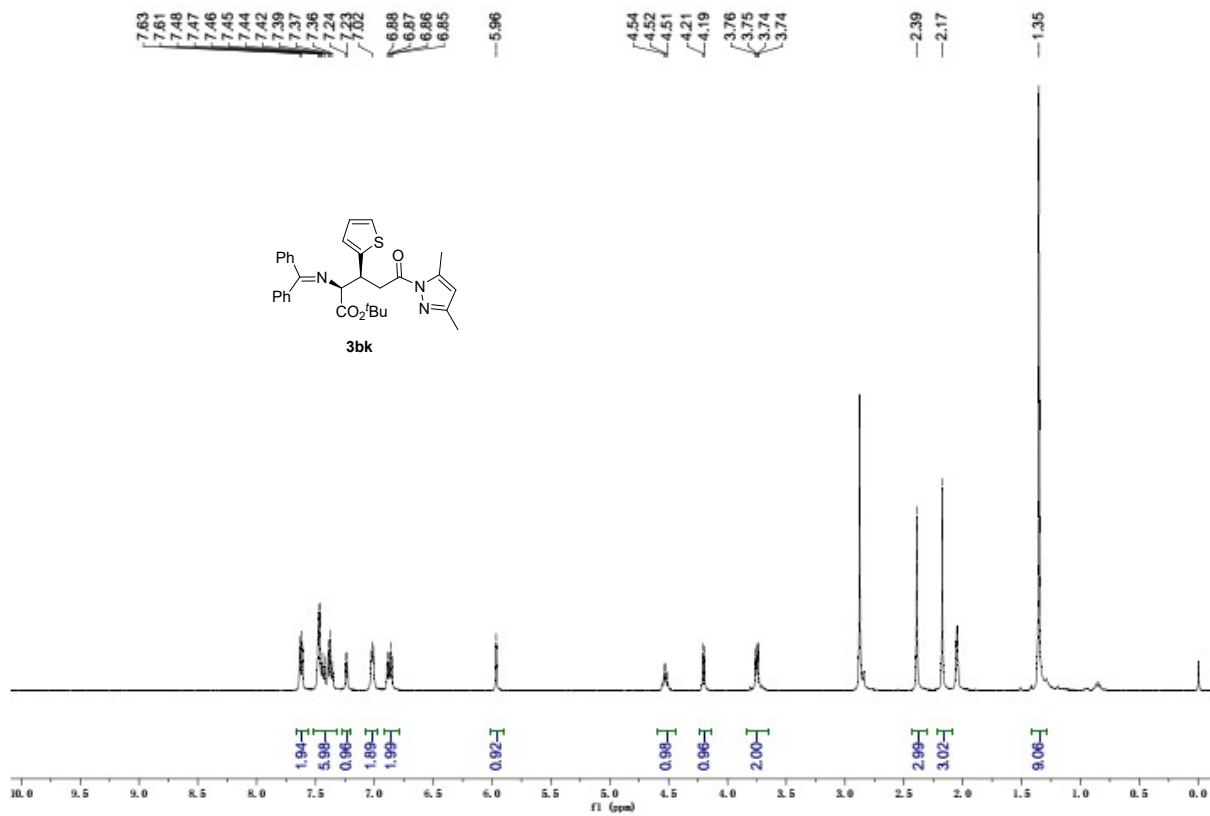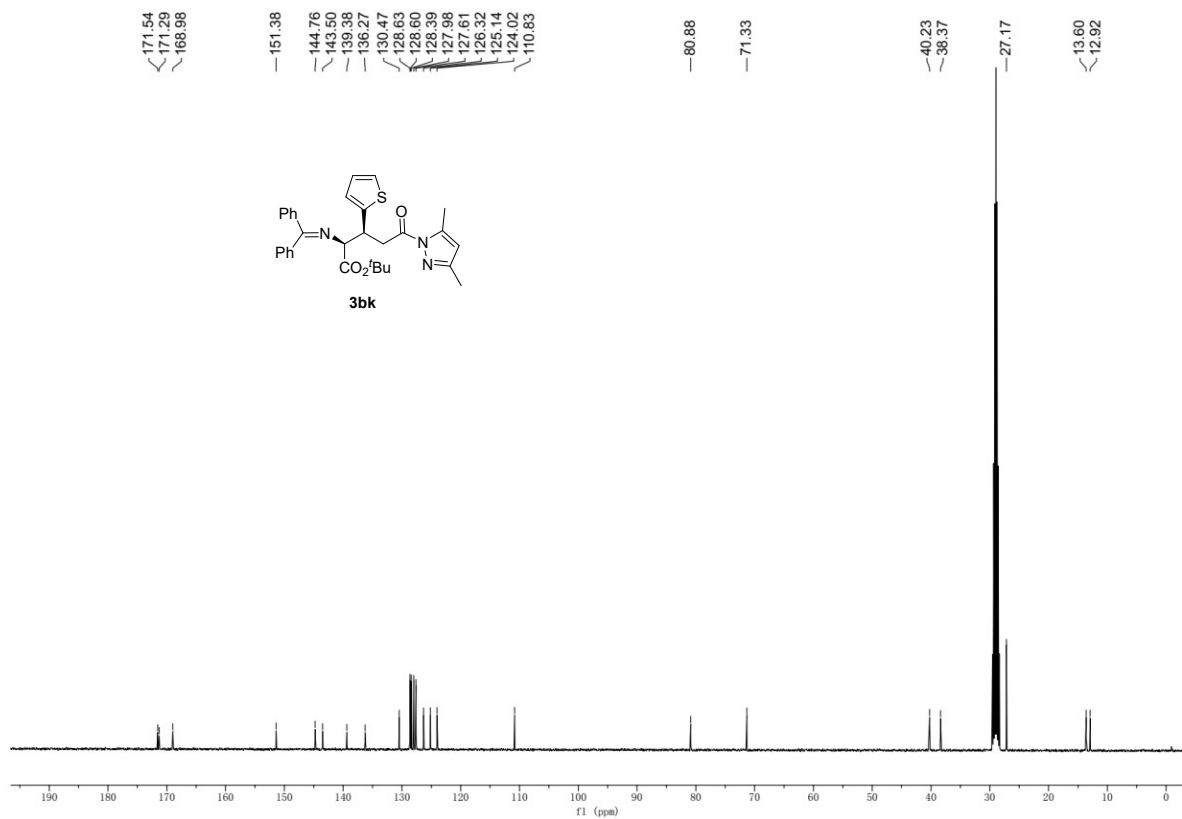

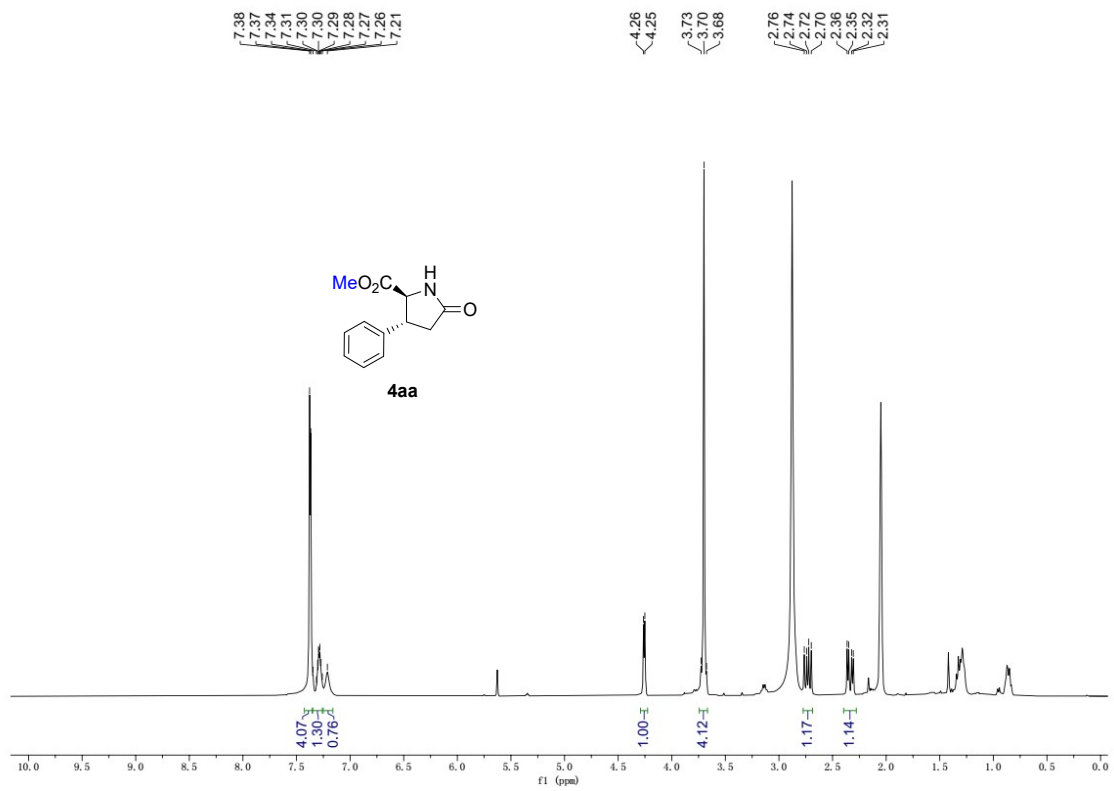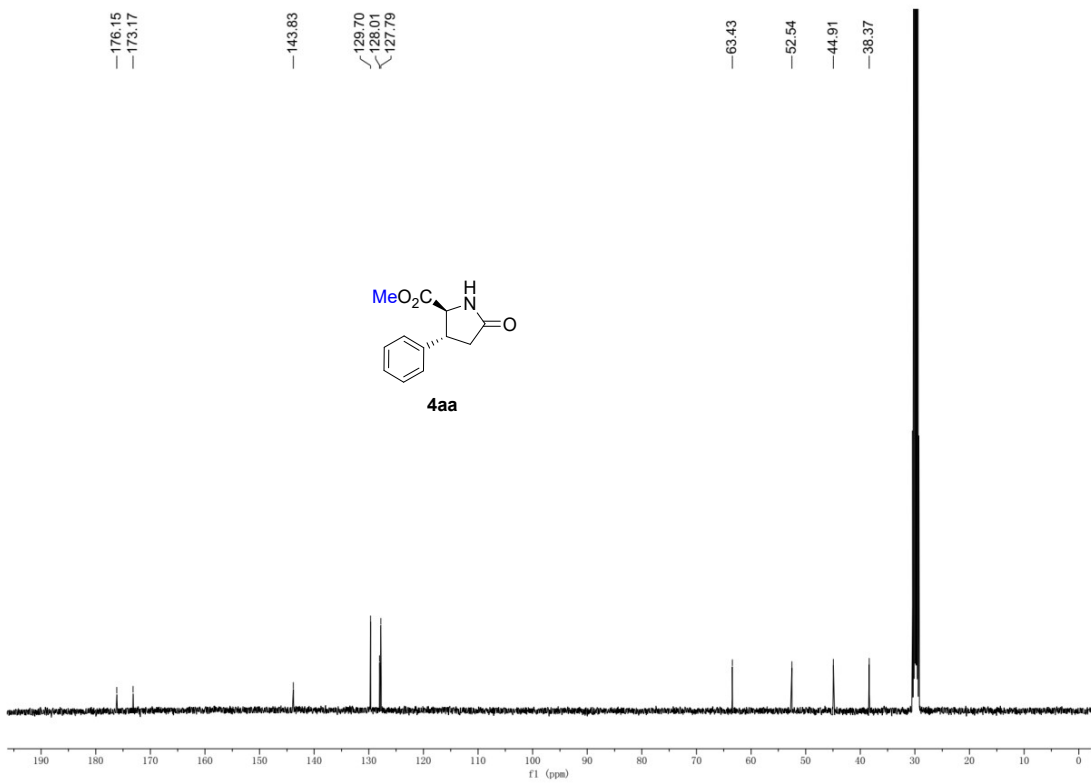

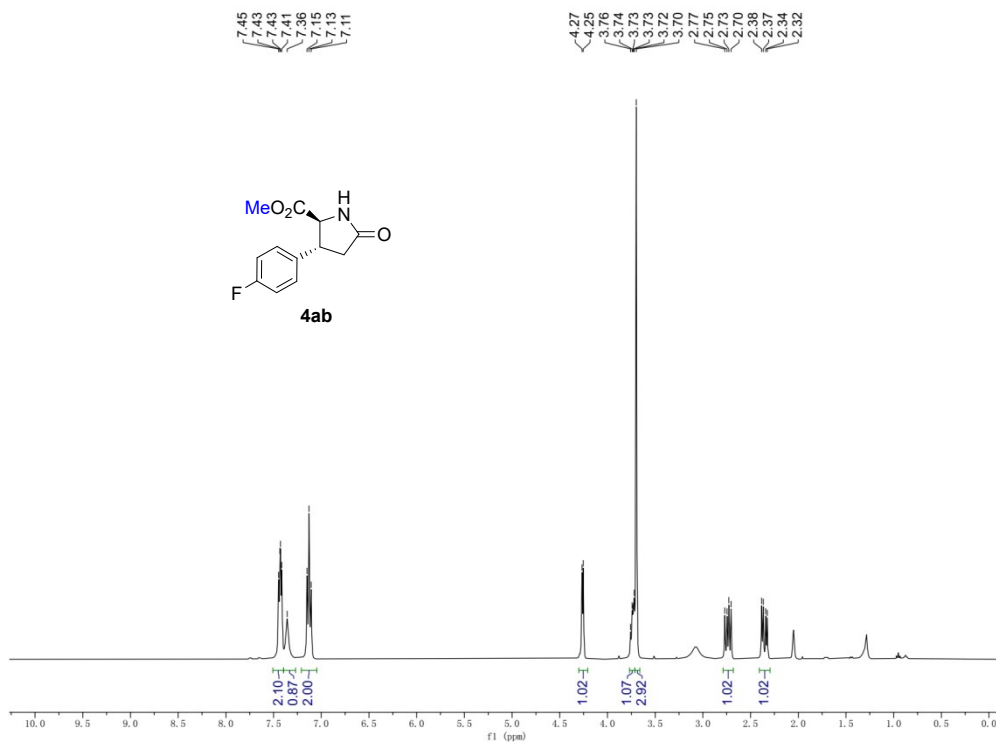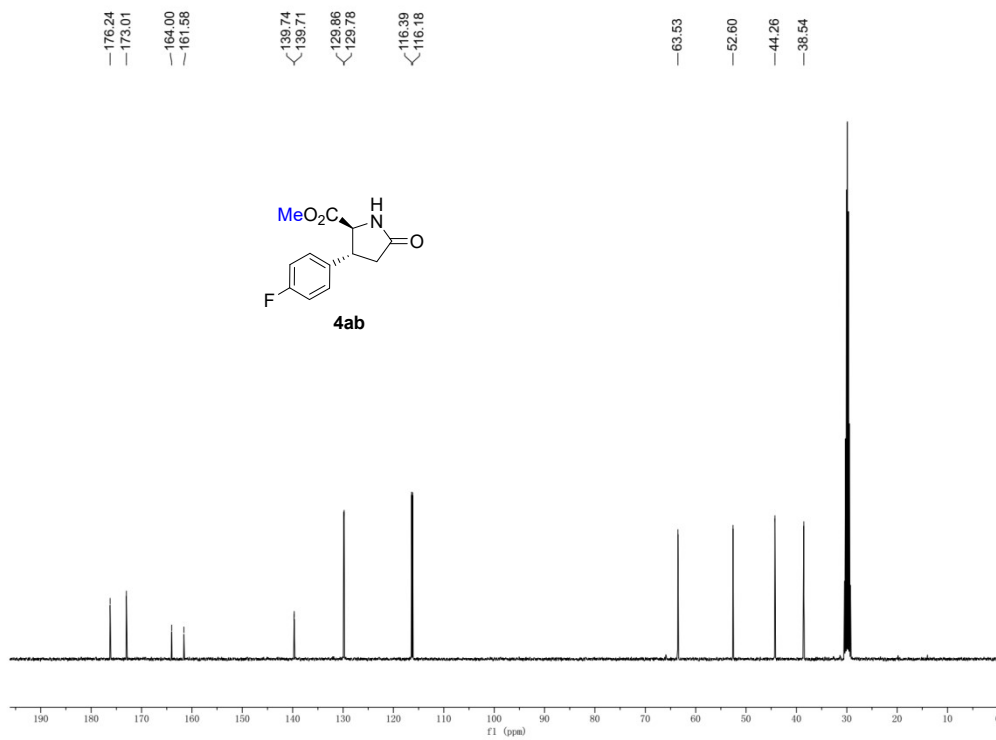

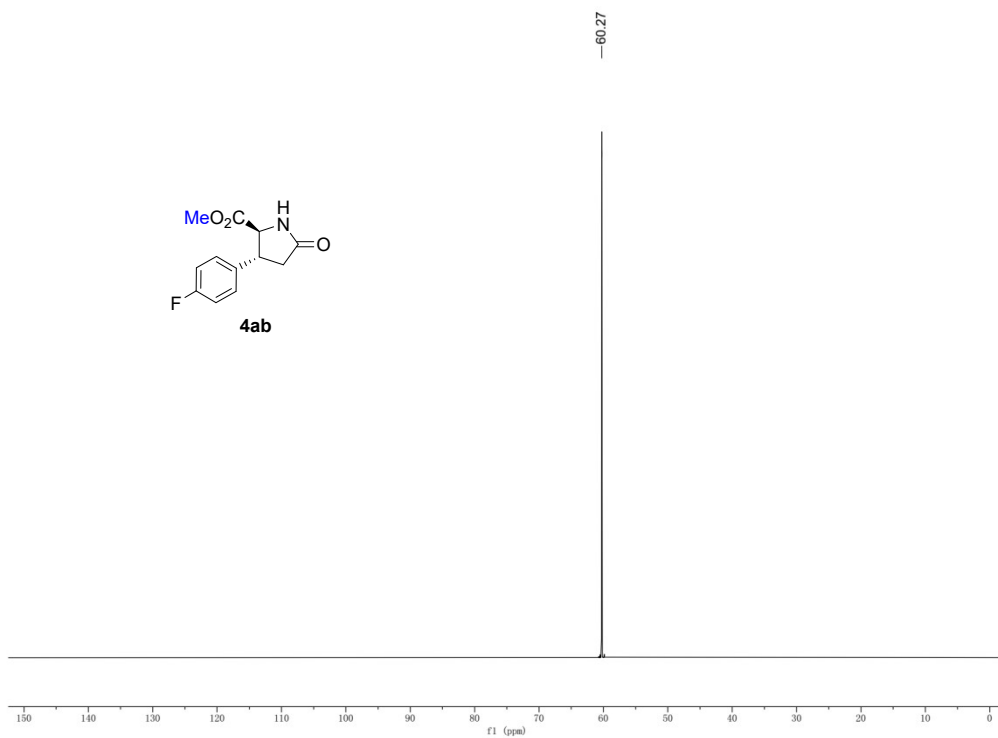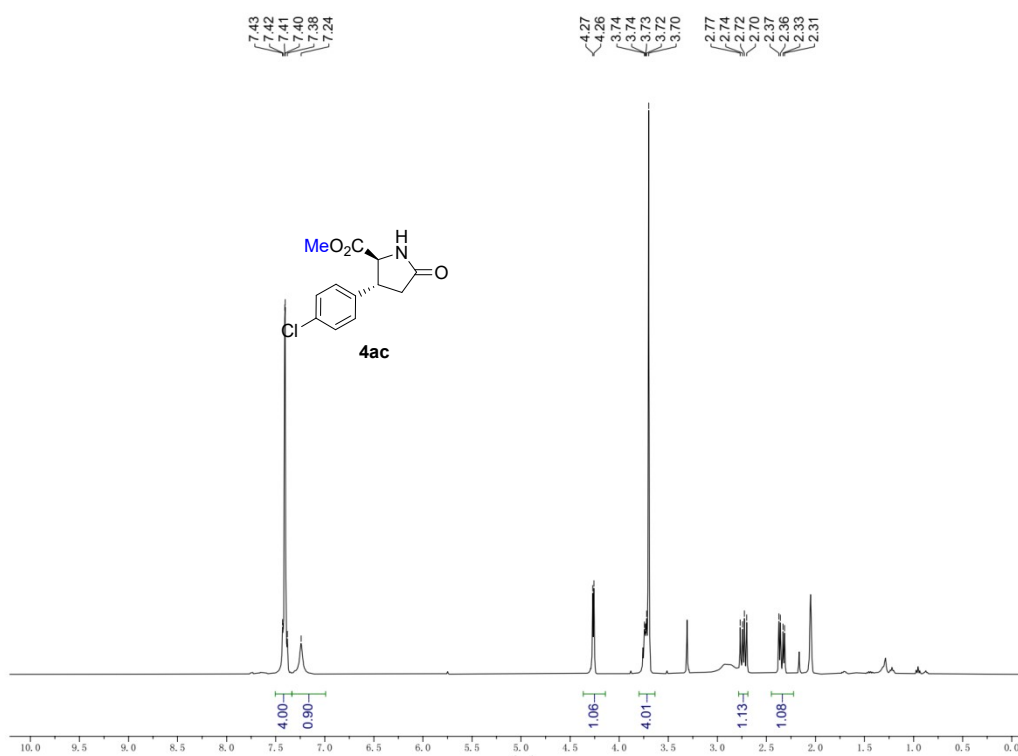

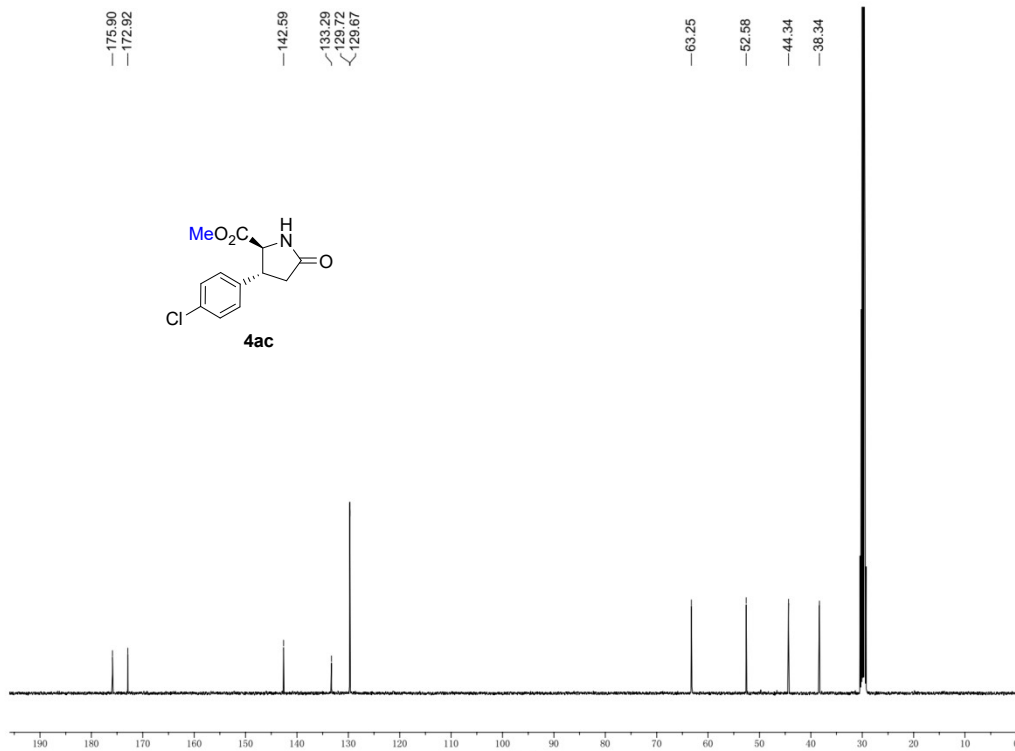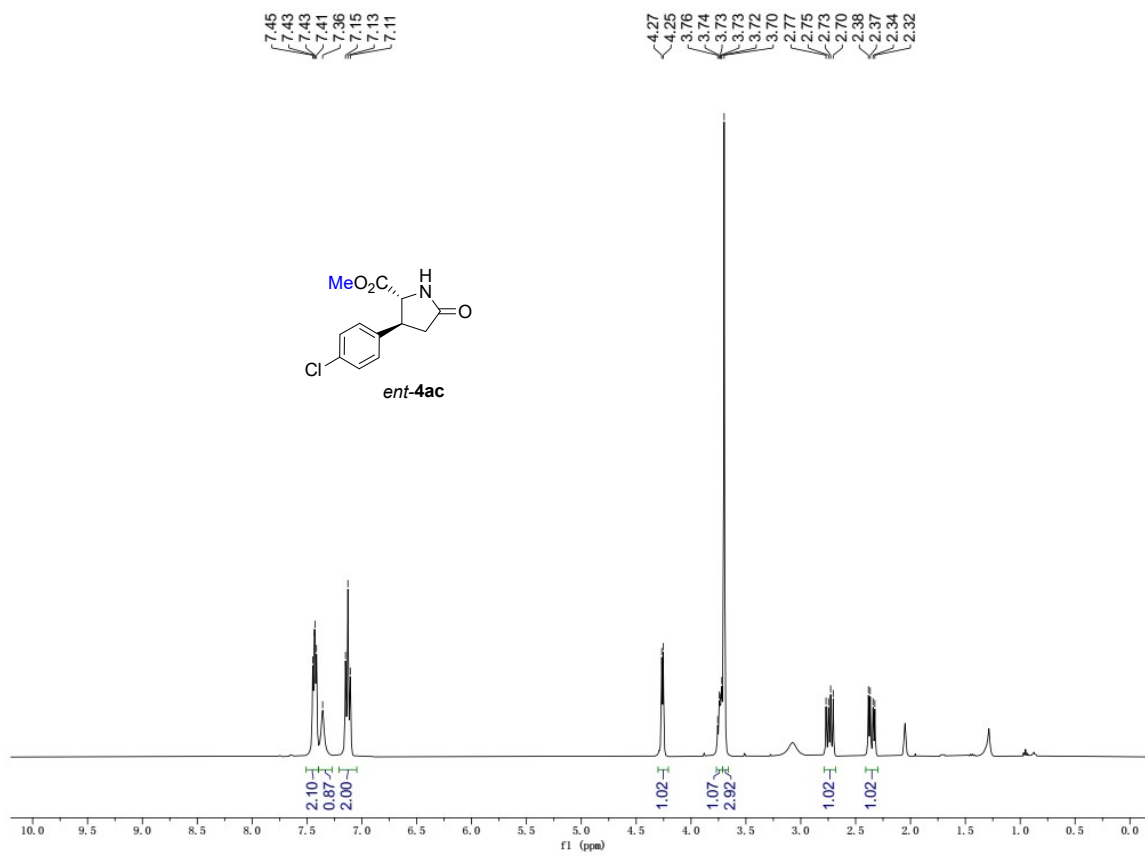

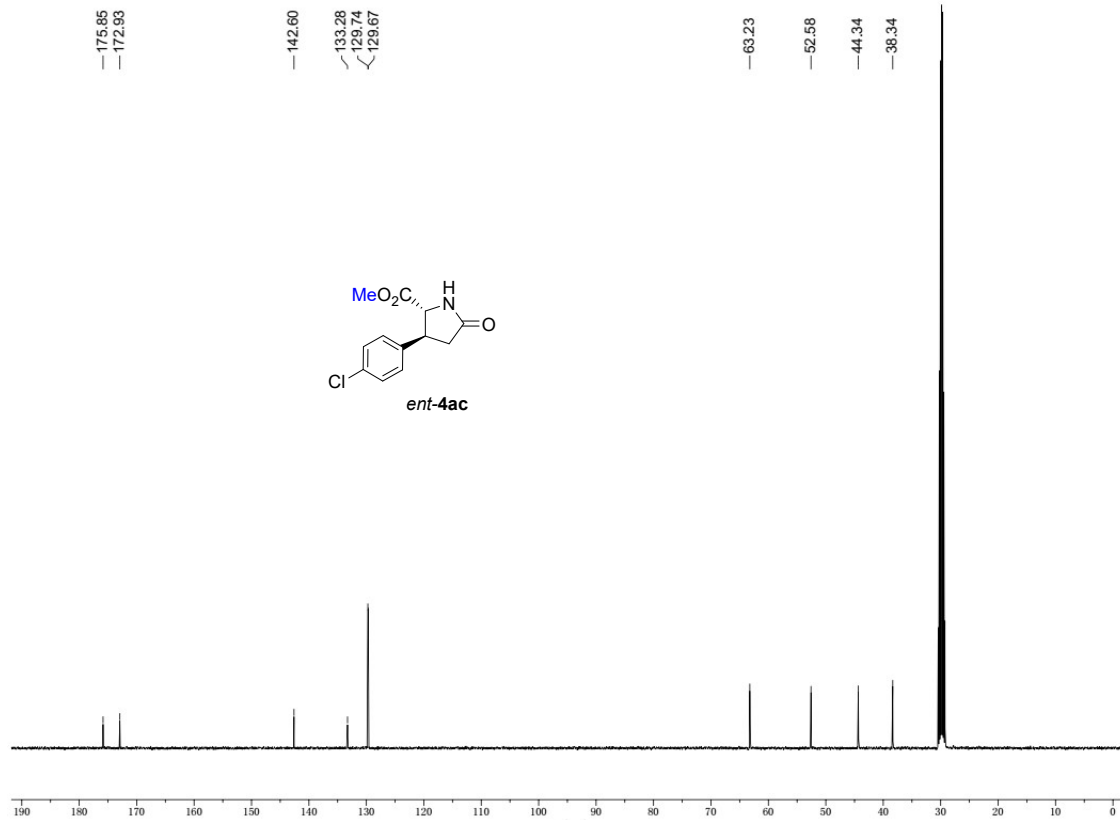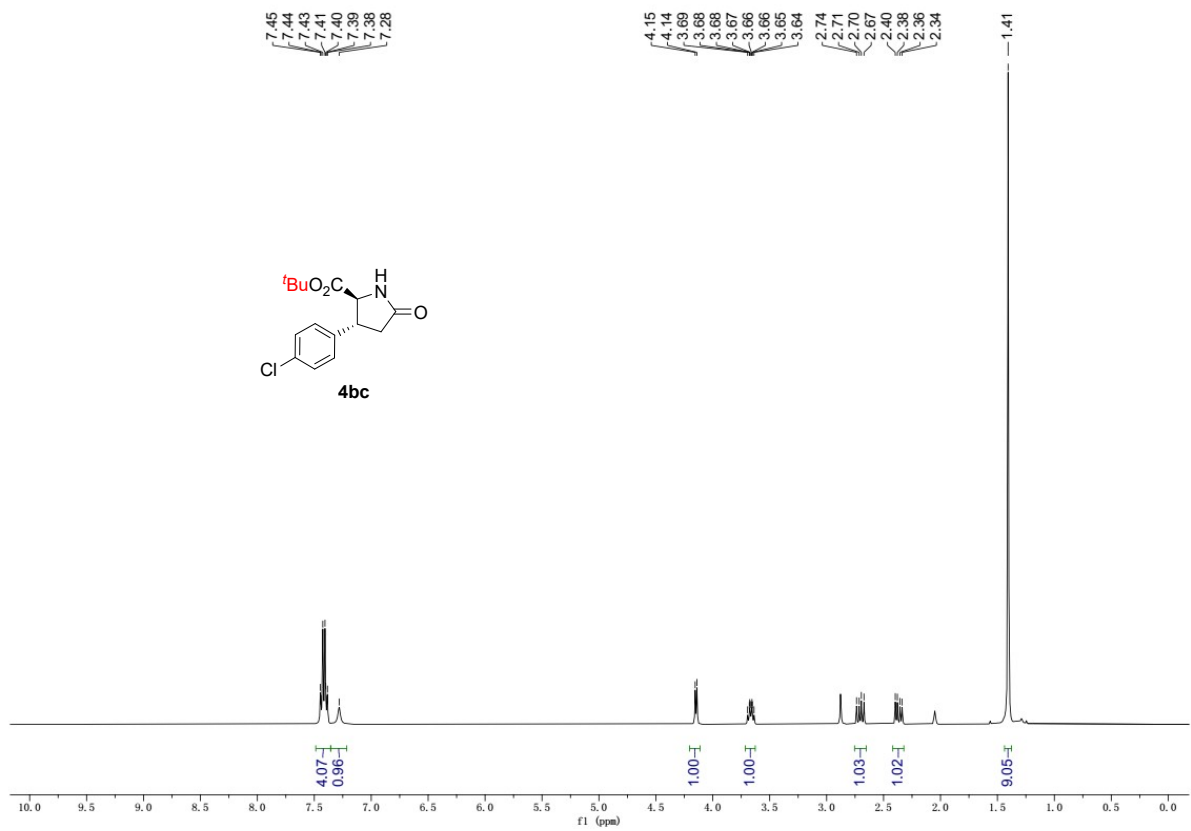

—175.84  
—171.53

—142.56  
—133.18  
—129.96  
—126.56

—82.21

—63.99

—44.77

—38.73

—28.08

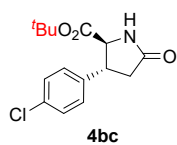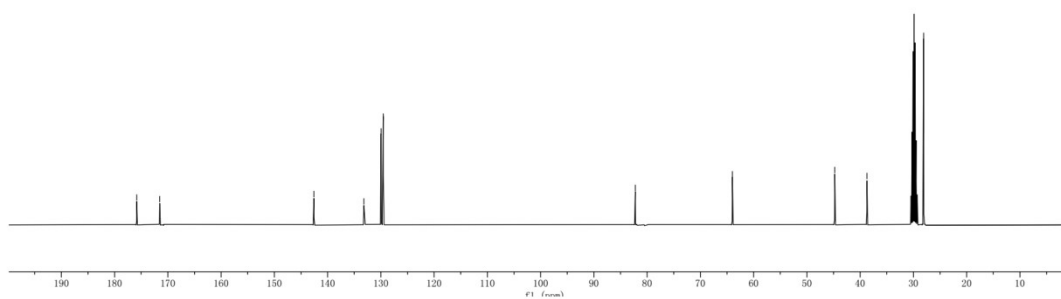

7.74  
7.72  
7.66  
7.63  
7.25

4.34  
4.33  
3.88  
3.85  
3.85  
3.84  
3.83  
3.71  
2.83  
2.80  
2.79  
2.74  
2.43  
2.41  
2.38  
2.37

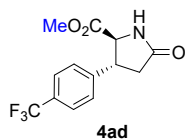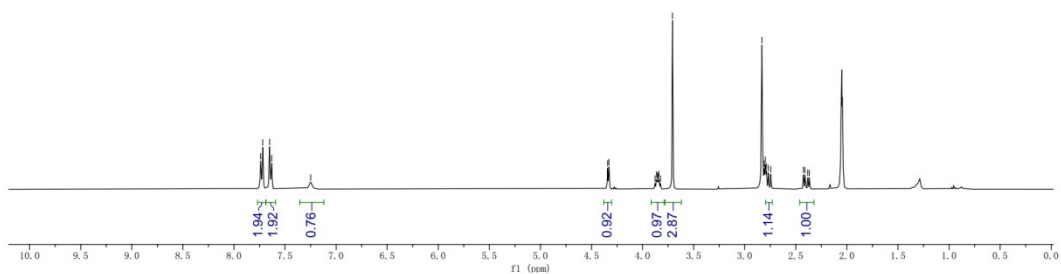



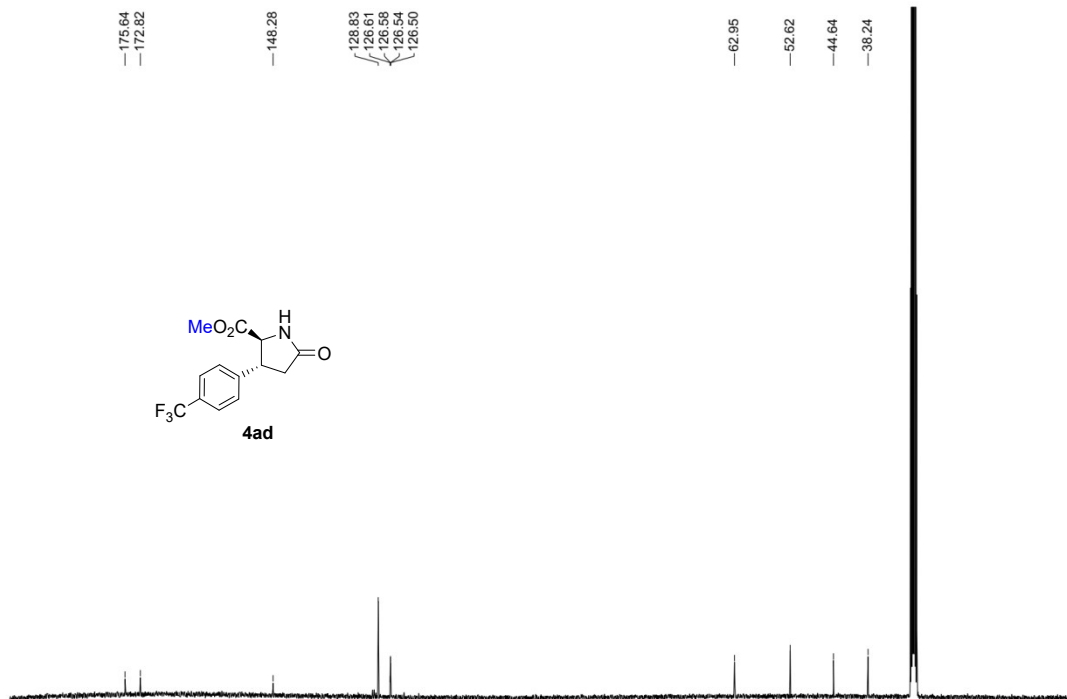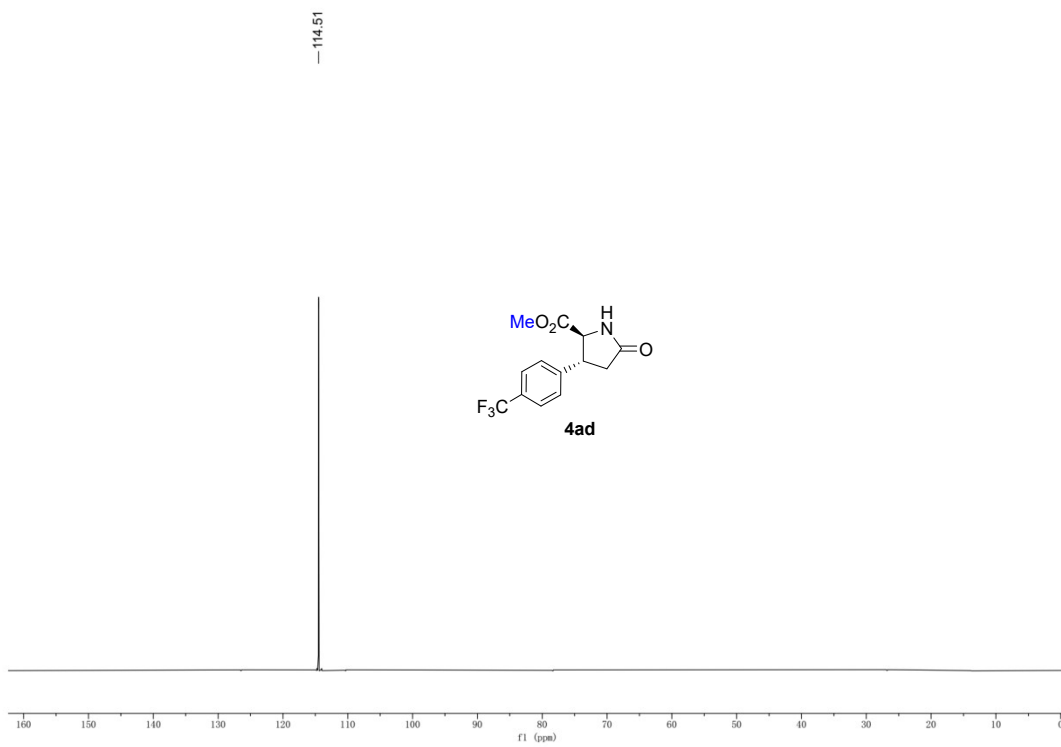

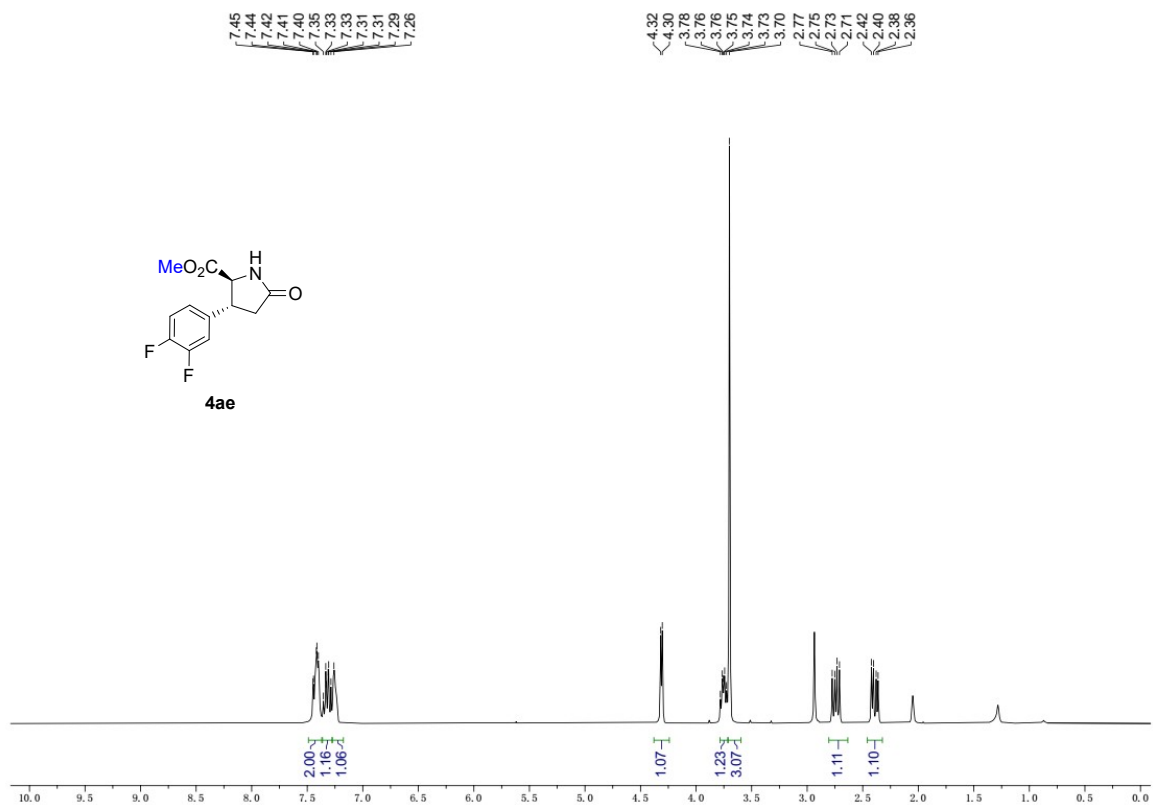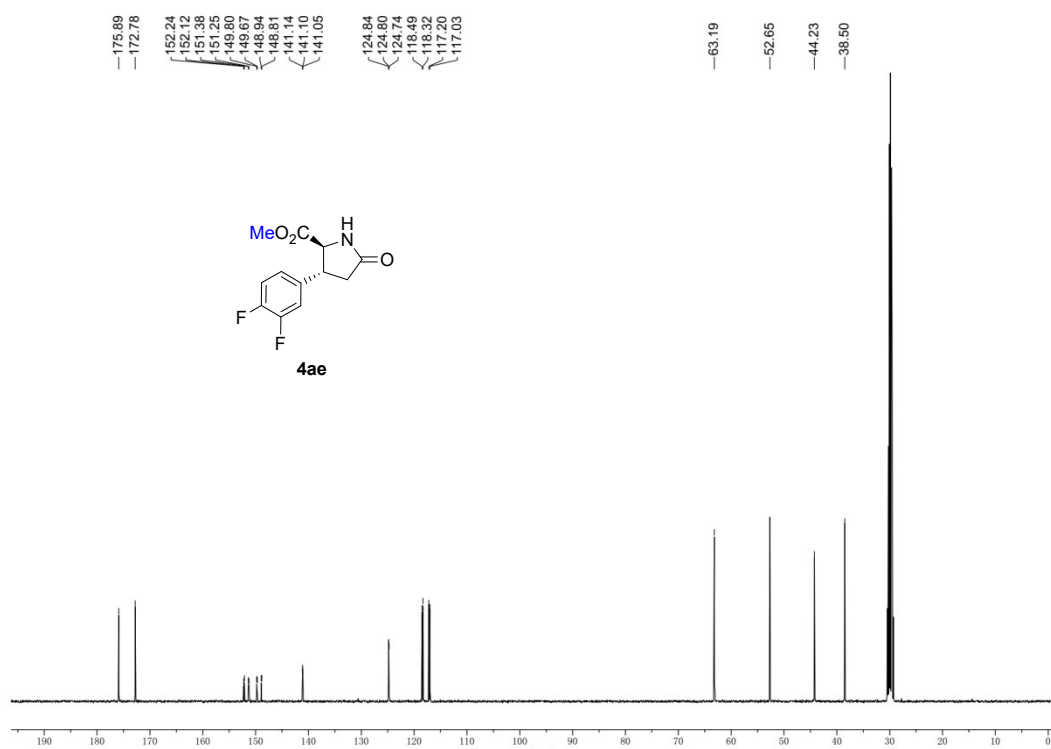

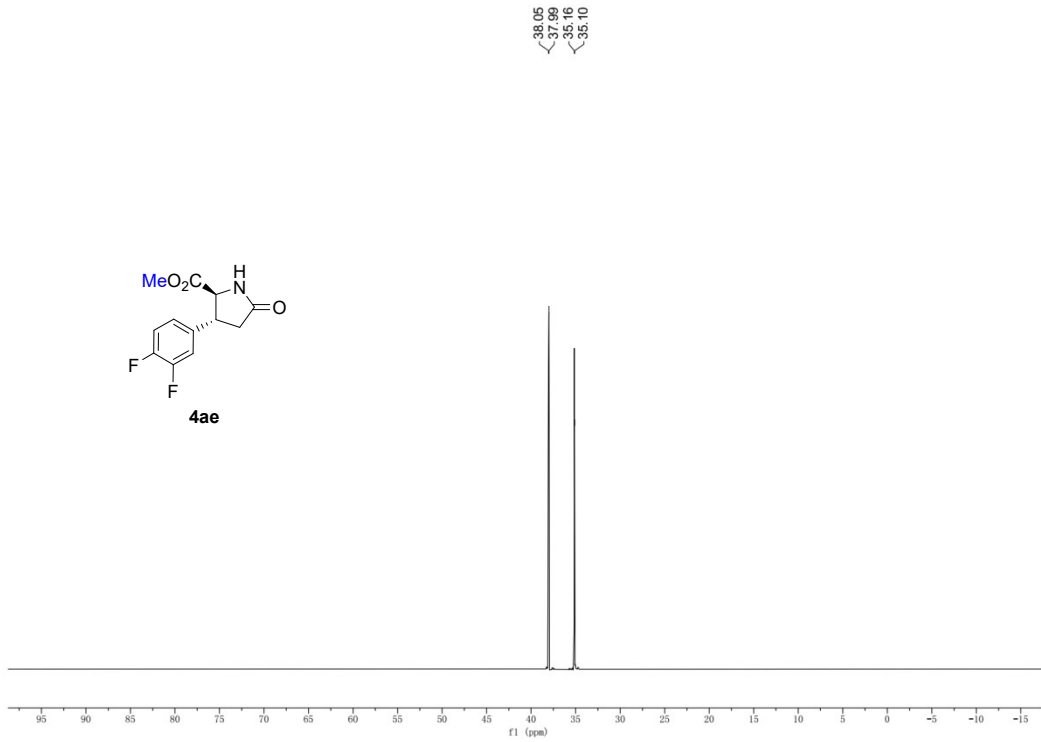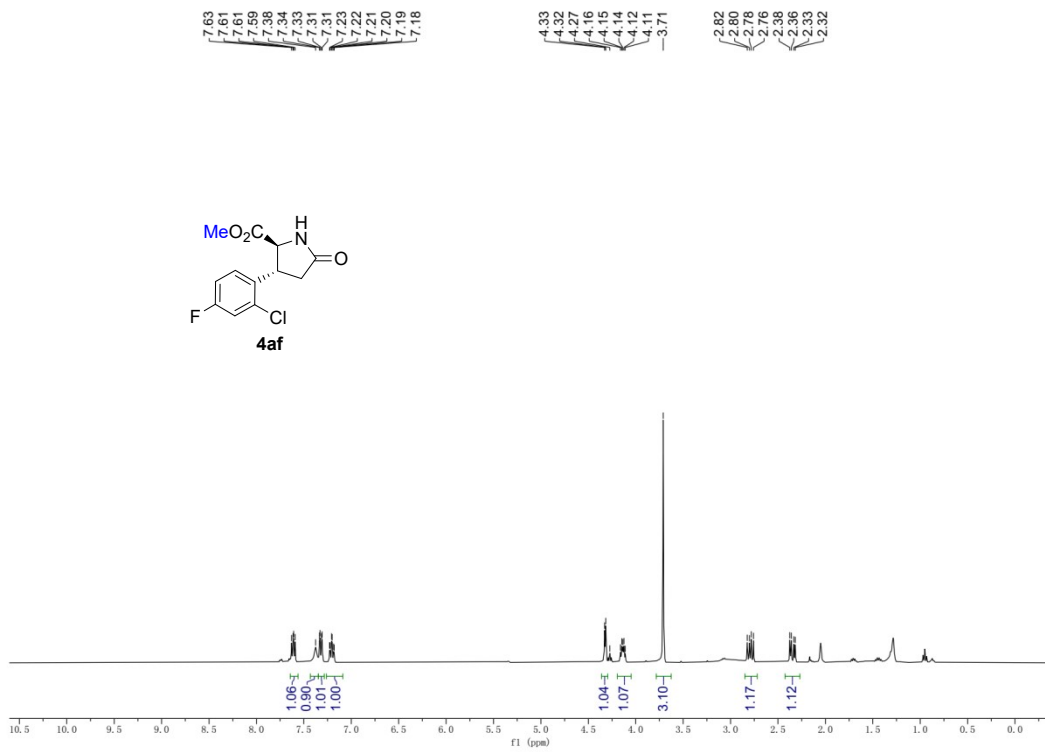

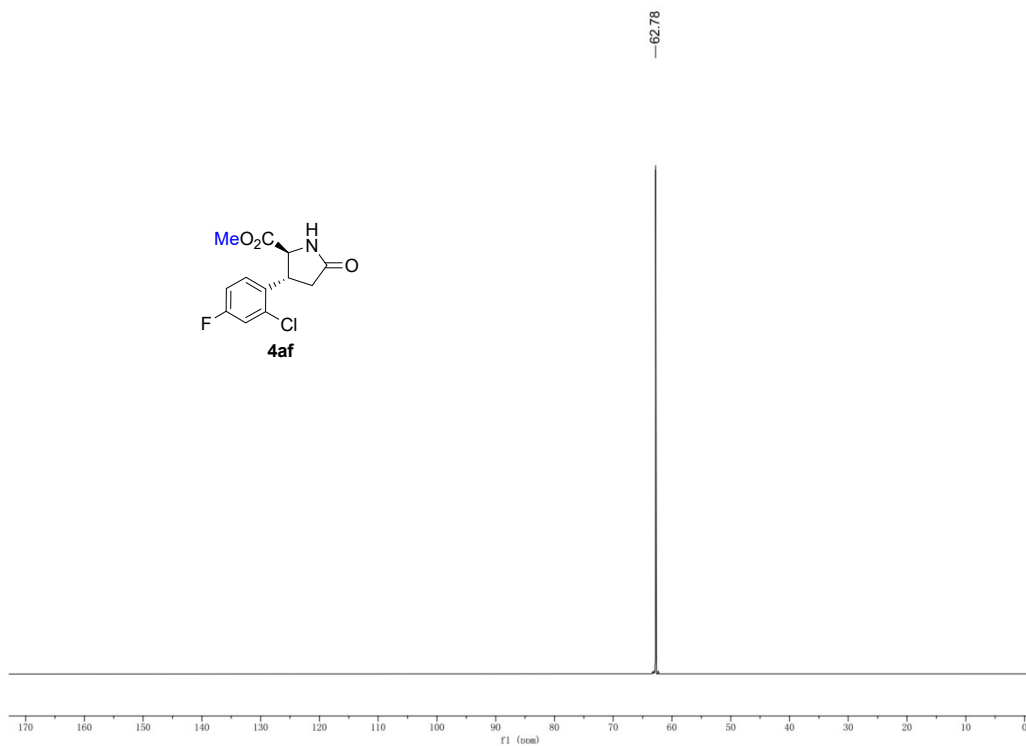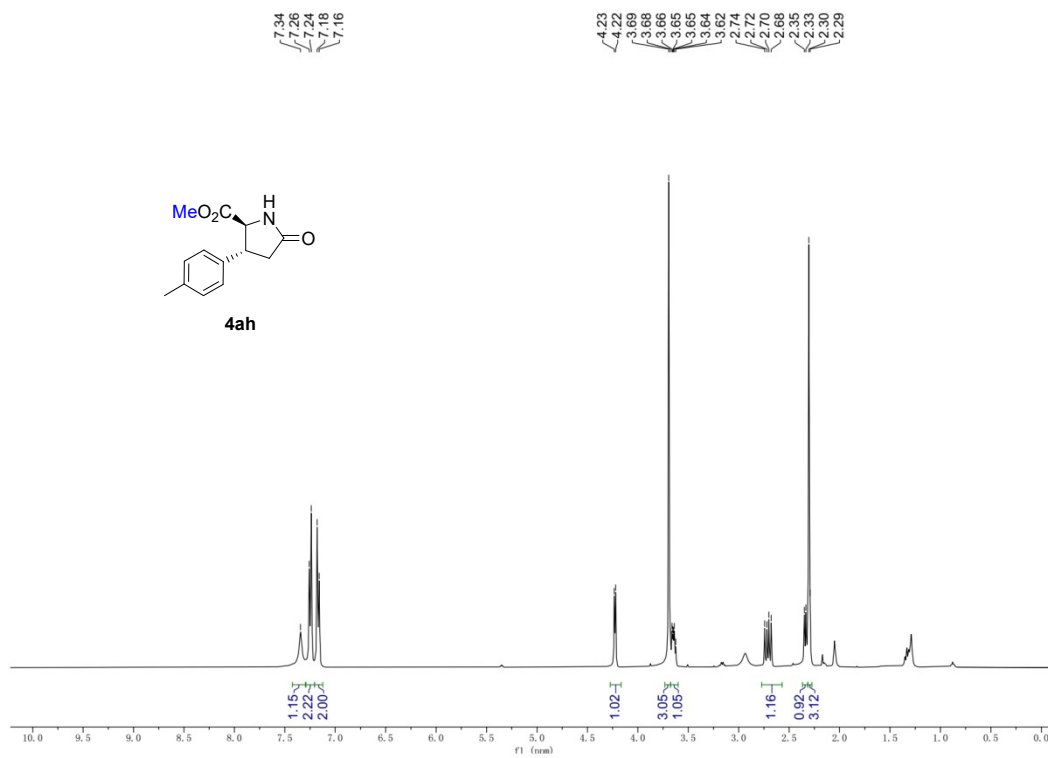

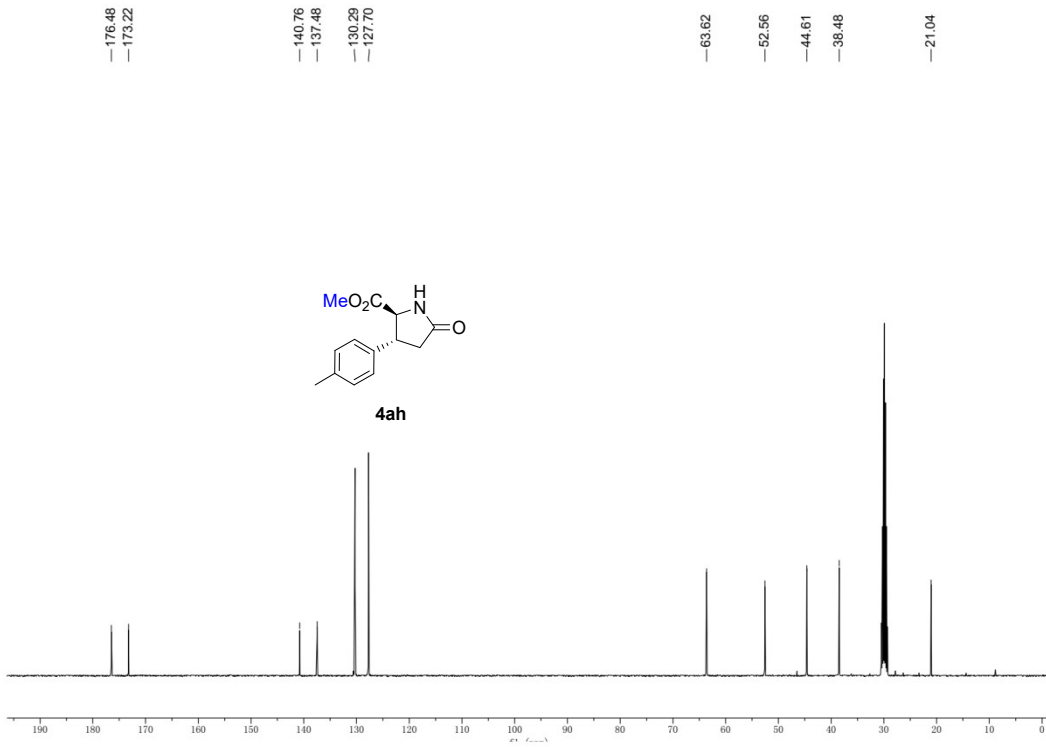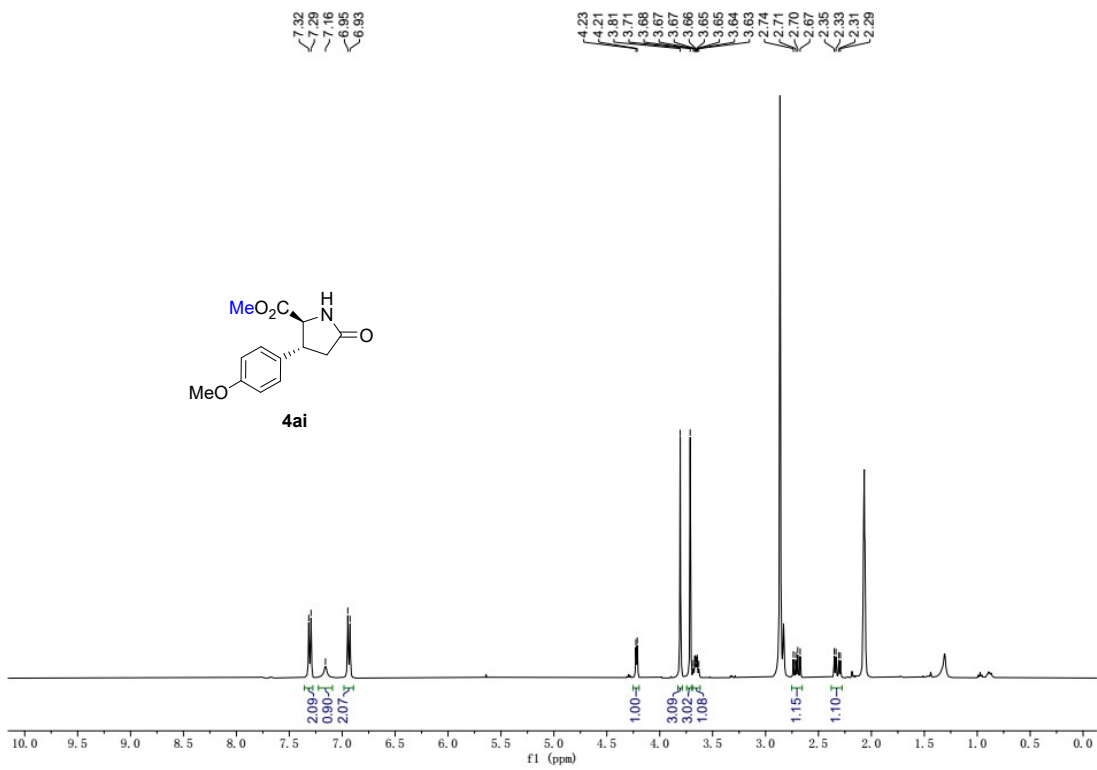

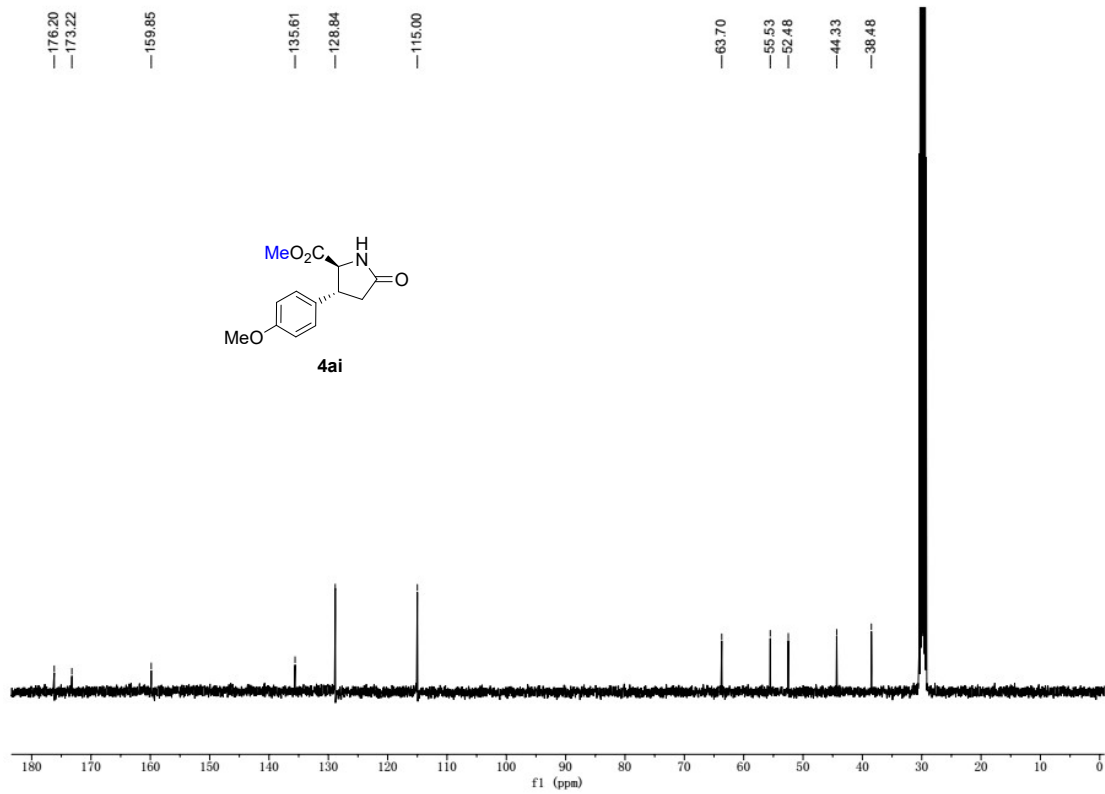

## 5. NOESY Copies

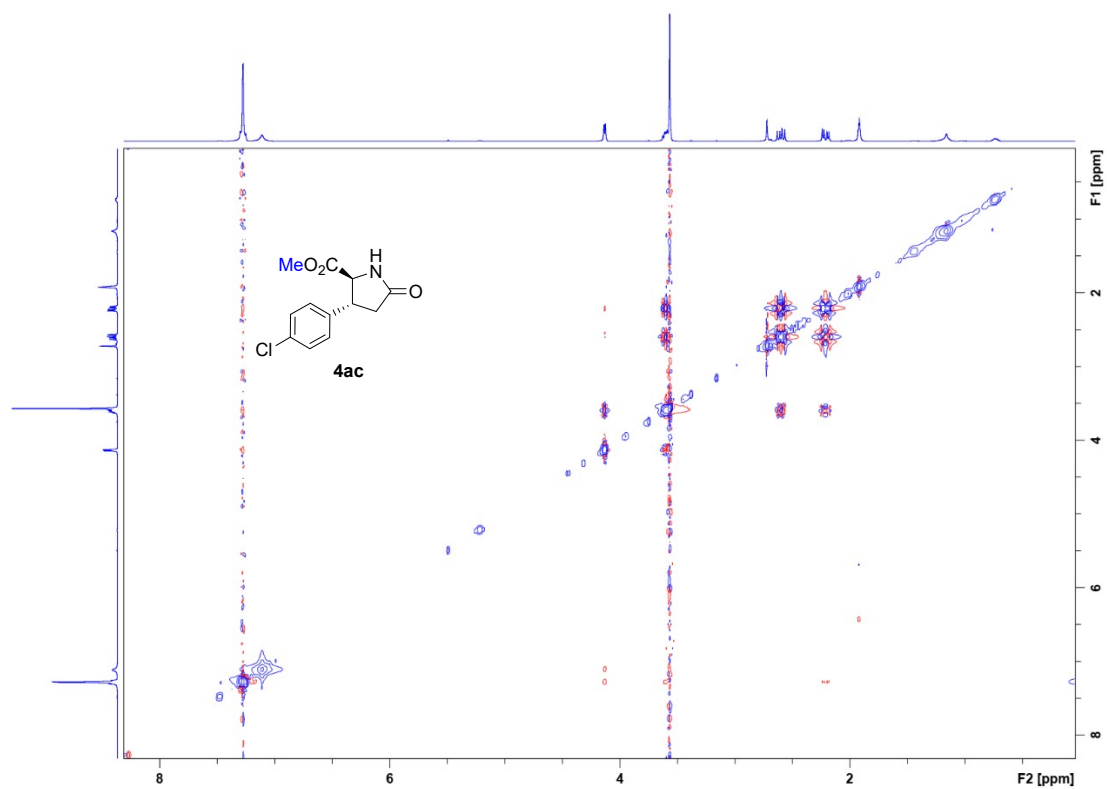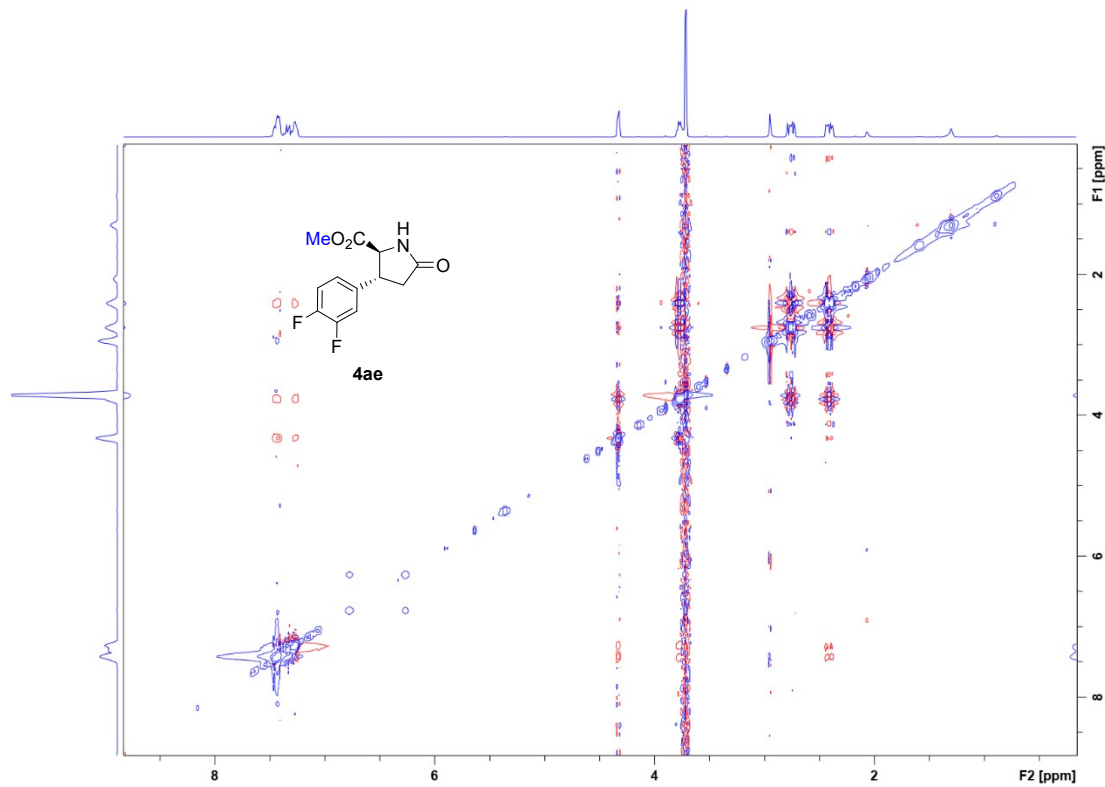

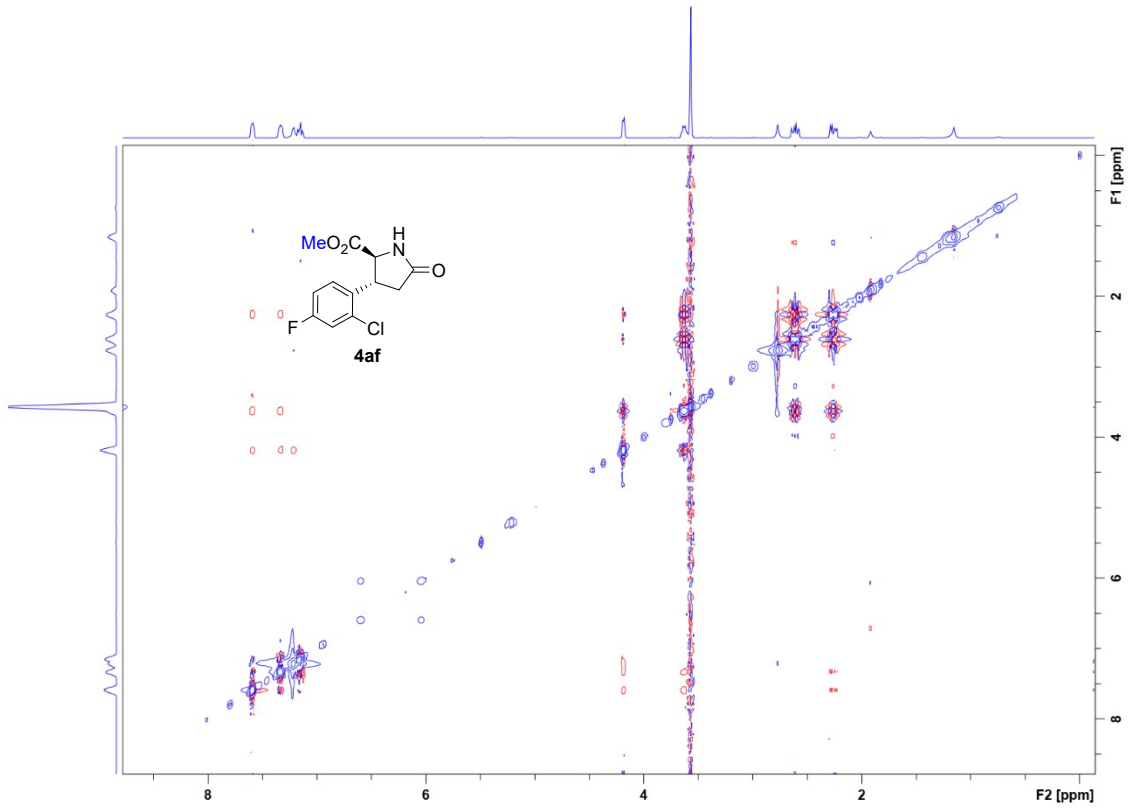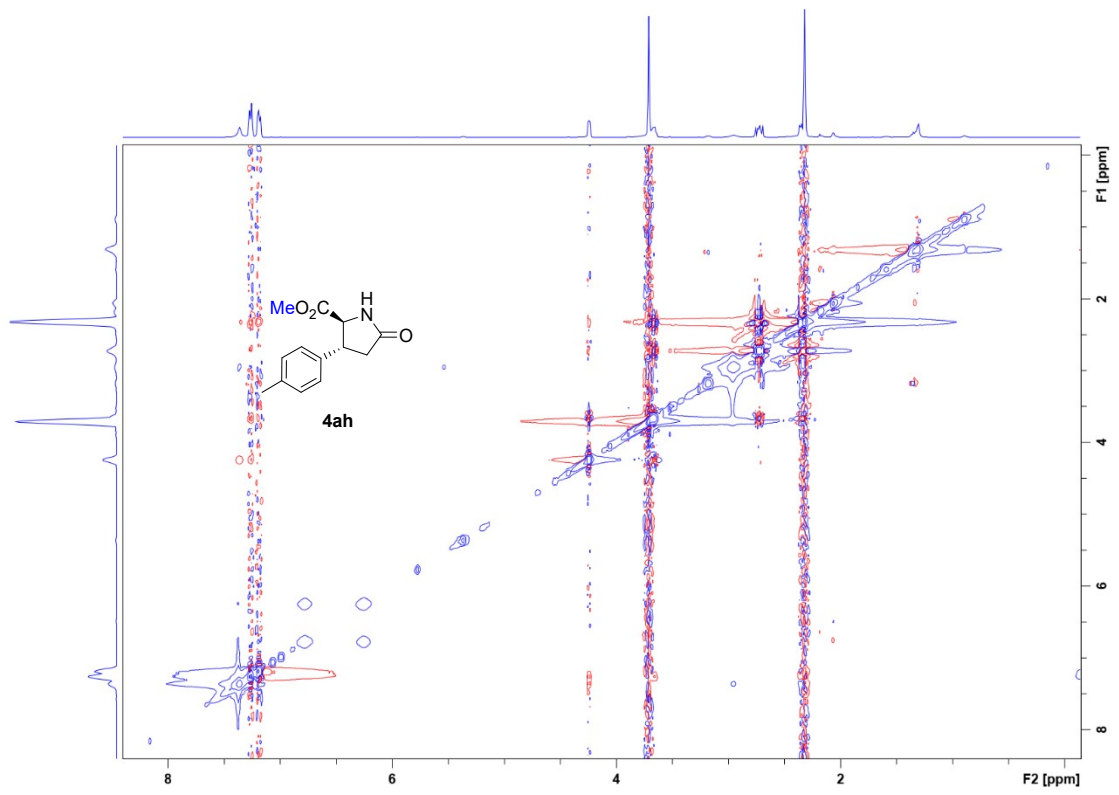



## 6. HRMS scanning copies

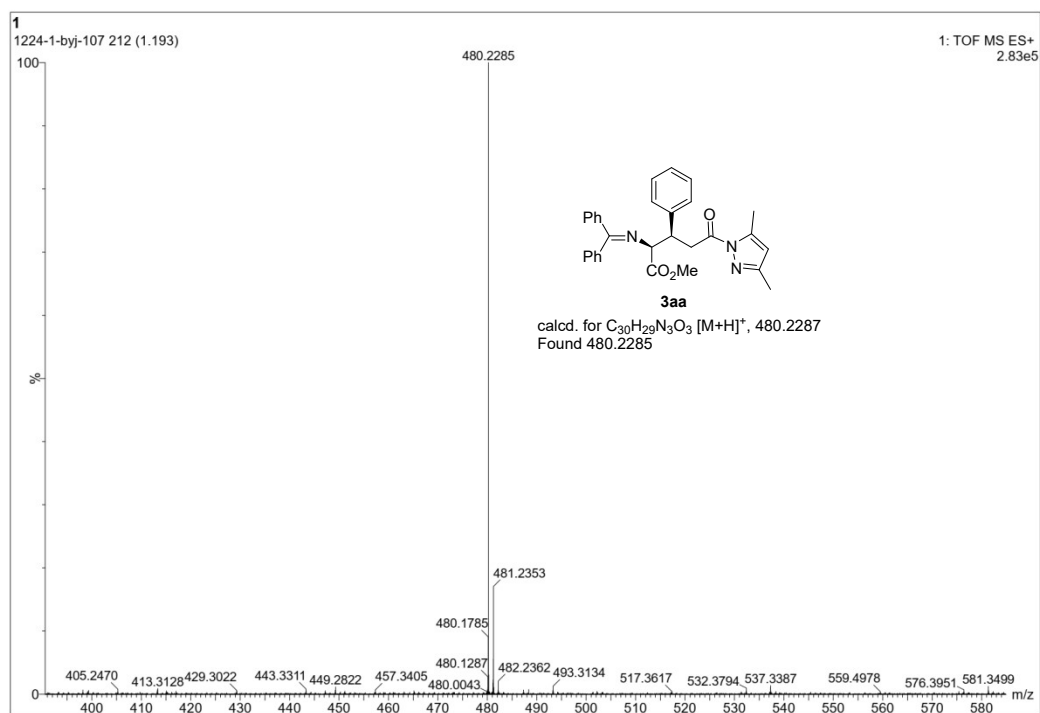

### Single Mass Analysis

Tolerance = 10.0 PPM / DBE: min = -1.5, max = 50.0

Element prediction: Off

Number of isotope peaks used for i-FIT = 3

Monoisotopic Mass, Even Electron Ions

997 formula(e) evaluated with 1 results within limits (up to 50 best isotopic matches for each mass)

Elements Used:

C: 30-31 H: 0-32 N: 0-6 O: 0-20 Br: 0-8 Mo: 0-1

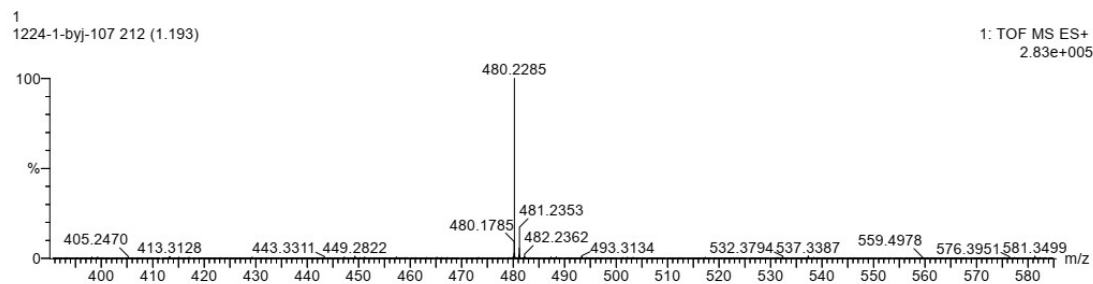

Minimum: -1.5

Maximum: 5.0 10.0 50.0

| Mass     | Calc. Mass | mDa  | PPM  | DBE  | i-FIT | Norm | Conf(%) | Formula                                                       |
|----------|------------|------|------|------|-------|------|---------|---------------------------------------------------------------|
| 480.2285 | 480.2287   | -0.2 | -0.4 | 17.5 | 896.5 | n/a  | n/a     | C <sub>30</sub> H <sub>30</sub> N <sub>3</sub> O <sub>3</sub> |

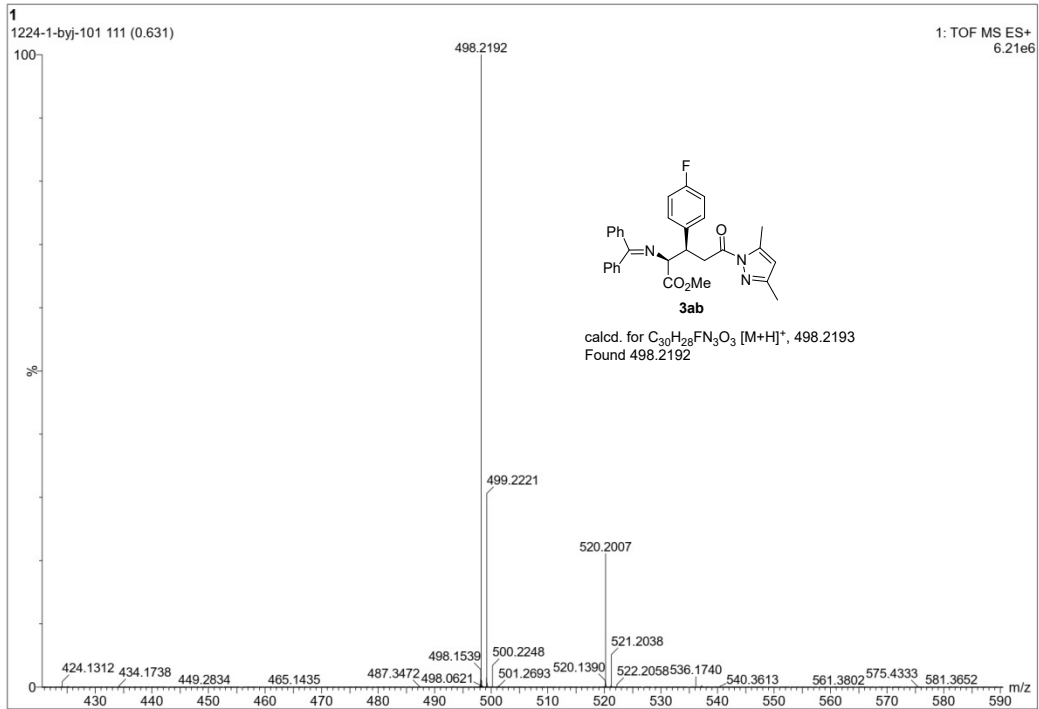

### Single Mass Analysis

Tolerance = 10.0 PPM / DBE: min = -1.5, max = 50.0

Element prediction: Off

Number of isotope peaks used for i-FIT = 3

Monoisotopic Mass, Even Electron Ions

2501 formula(e) evaluated with 1 results within limits (up to 50 best isotopic matches for each mass)

Elements Used:

C: 30-30 H: 29-29 N: 0-6 O: 0-20 S: 0-4 Mo: 0-1 F: 0-1

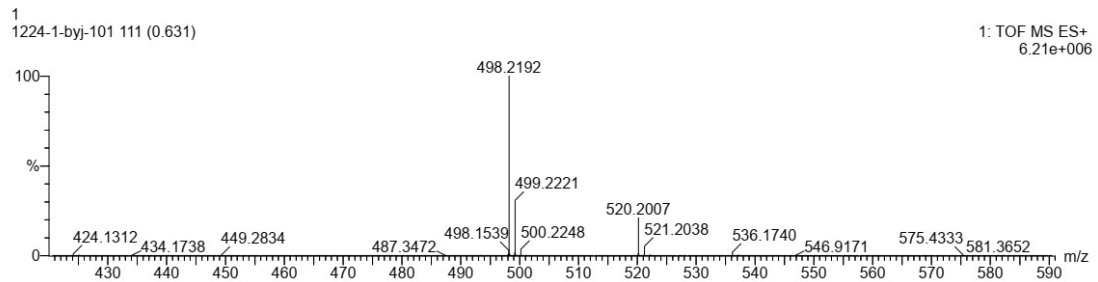

Minimum: -1.5  
Maximum: 5.0 10.0 50.0

| Mass     | Calc. Mass | mDa  | PPM  | DBE  | i-FIT | Norm | Conf (%) | Formula         |
|----------|------------|------|------|------|-------|------|----------|-----------------|
| 498.2192 | 498.2193   | -0.1 | -0.2 | 17.5 | 973.0 | n/a  | n/a      | C30 H29 N3 O3 F |

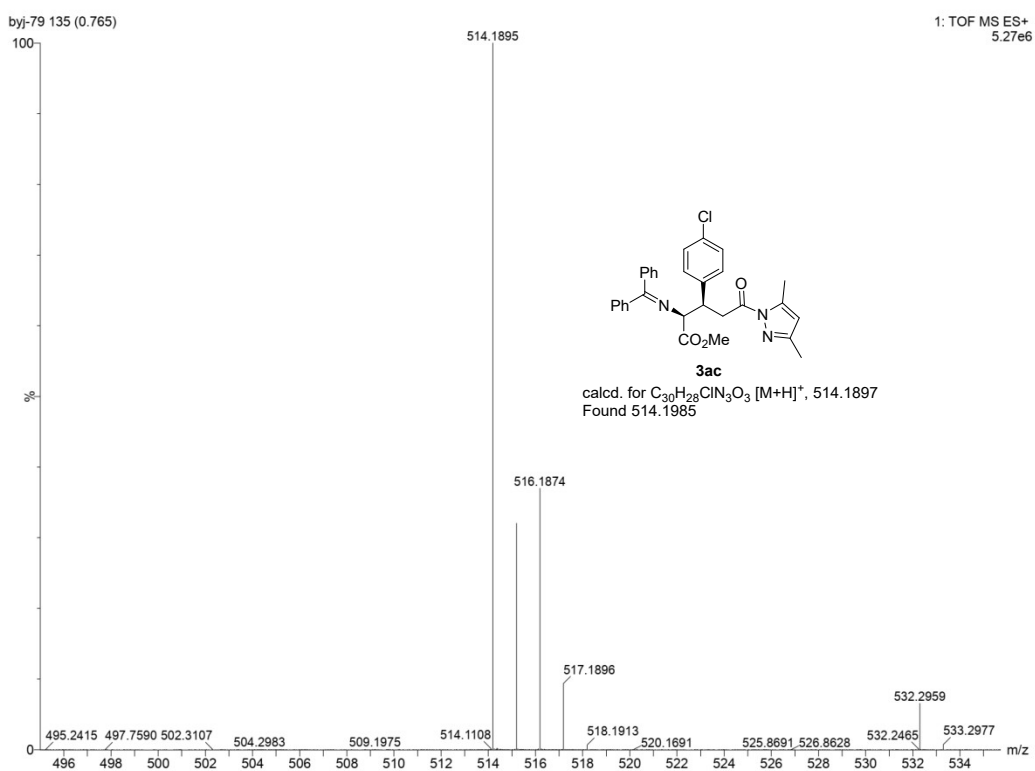

### Single Mass Analysis

Tolerance = 20.0 PPM / DBE: min = -1.5, max = 50.0

Element prediction: Off

Number of isotope peaks used for i-FIT = 3

Monoisotopic Mass, Even Electron Ions

15 formula(e) evaluated with 1 results within limits (up to 50 best isotopic matches for each mass)

Elements Used:

C: 20-30 H: 0-50 N: 3-6 O: 3-3 Cl: 1-1

byj-79 135 (0.765)

1: TOF MS ES+

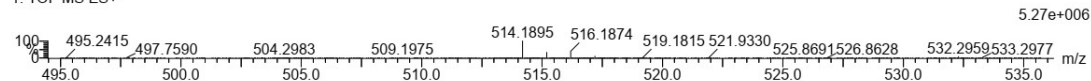

Minimum: -1.5  
 Maximum: 50.0

| Mass     | Calc. Mass | mDa  | PPM  | DBE  | i-FIT | Norm | Conf (%) | Formula                                                          |
|----------|------------|------|------|------|-------|------|----------|------------------------------------------------------------------|
| 514.1895 | 514.1897   | -0.2 | -0.4 | 17.5 | 887.8 | n/a  | n/a      | C <sub>30</sub> H <sub>29</sub> N <sub>3</sub> O <sub>3</sub> Cl |

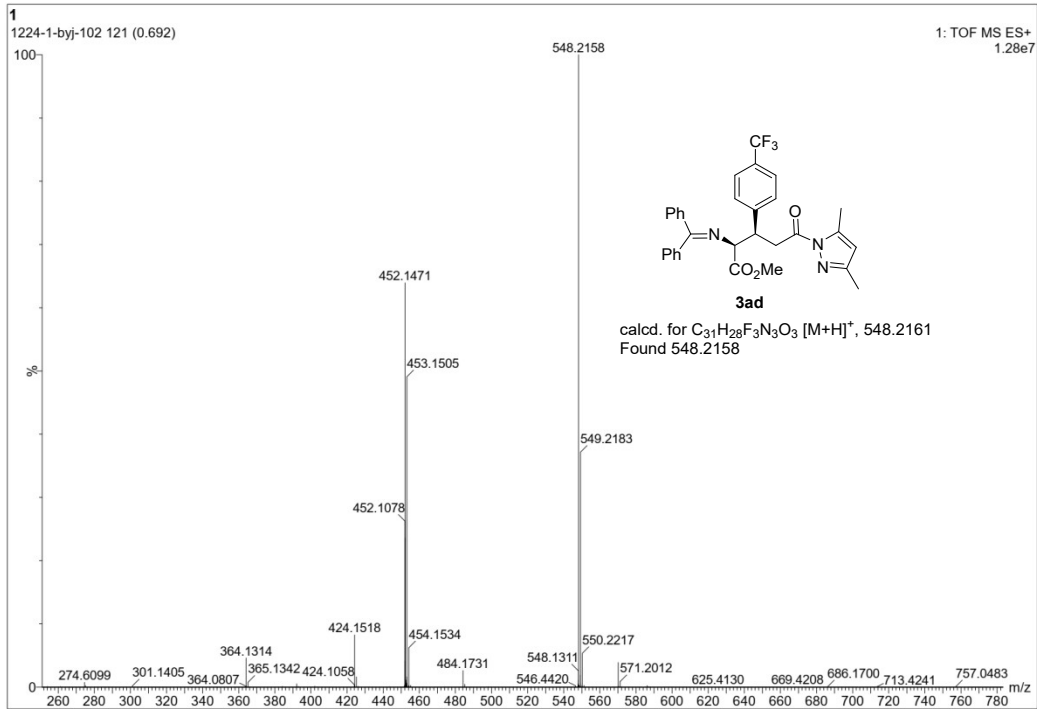

### Single Mass Analysis

Tolerance = 10.0 PPM / DBE: min = -1.5, max = 50.0

Element prediction: Off

Number of isotope peaks used for i-FIT = 3

Monoisotopic Mass, Even Electron Ions

6323 formula(e) evaluated with 1 results within limits (up to 50 best isotopic matches for each mass)

Elements Used:

C: 31-31 H: 29-29 N: 0-6 O: 0-20 F: 0-4 S: 0-4 Mo: 0-1

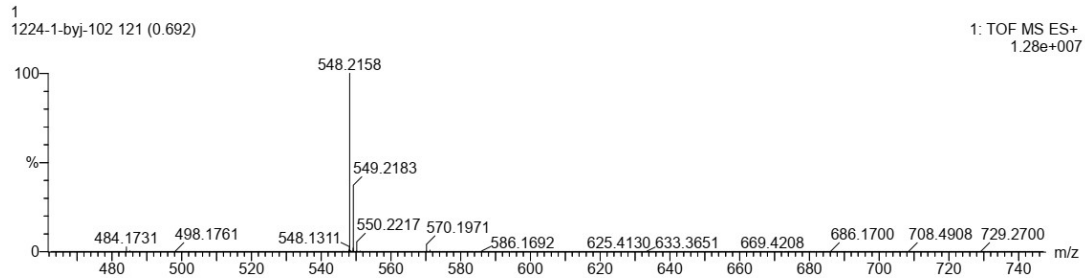

Minimum: 5.0 10.0 -1.5

Maximum: 50.0 50.0 50.0

| Mass     | Calc. Mass | mDa  | PPM  | DBE  | i-FIT  | Norm | Conf (%) | Formula          |
|----------|------------|------|------|------|--------|------|----------|------------------|
| 548.2158 | 548.2161   | -0.3 | -0.5 | 17.5 | 1023.3 | n/a  | n/a      | C31 H29 N3 O3 F3 |

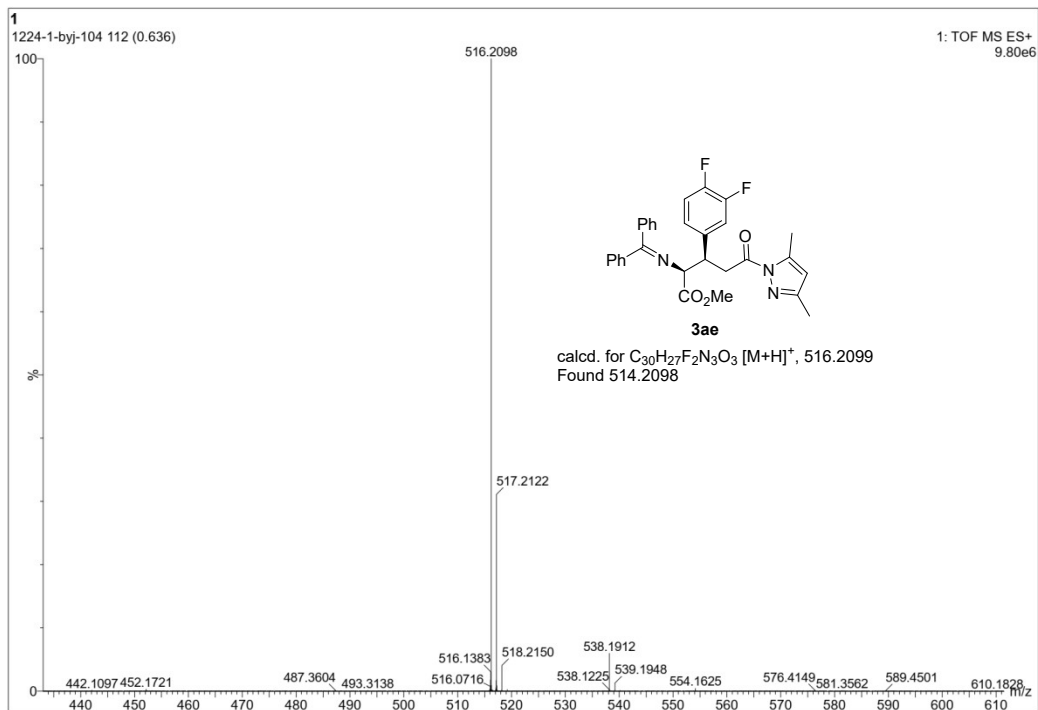

### Single Mass Analysis

Tolerance = 10.0 PPM / DBE: min = -1.5, max = 50.0

Element prediction: Off

Number of isotope peaks used for i-FIT = 3

Monoisotopic Mass, Even Electron Ions

26636 formula(e) evaluated with 1 results within limits (up to 50 best isotopic matches for each mass)

Elements Used:

C: 30-30 H: 28-28 N: 0-6 O: 0-20 F: 0-4 S: 0-4 Cl: 0-4 Mo: 0-1

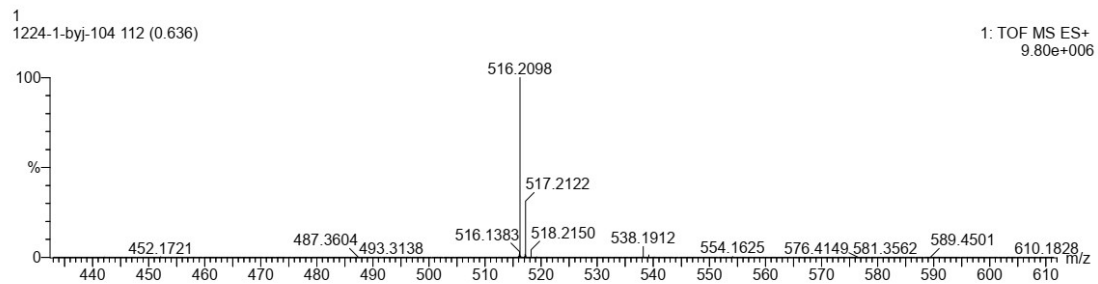

Minimum: -1.5

Maximum: 5.0 10.0 50.0

| Mass     | Calc. Mass | mDa  | PPM  | DBE  | i-FIT  | Norm | Conf (%) | Formula                                                                      |
|----------|------------|------|------|------|--------|------|----------|------------------------------------------------------------------------------|
| 516.2098 | 516.2099   | -0.1 | -0.2 | 17.5 | 1115.3 | n/a  | n/a      | C <sub>30</sub> H <sub>28</sub> N <sub>3</sub> O <sub>3</sub> F <sub>2</sub> |

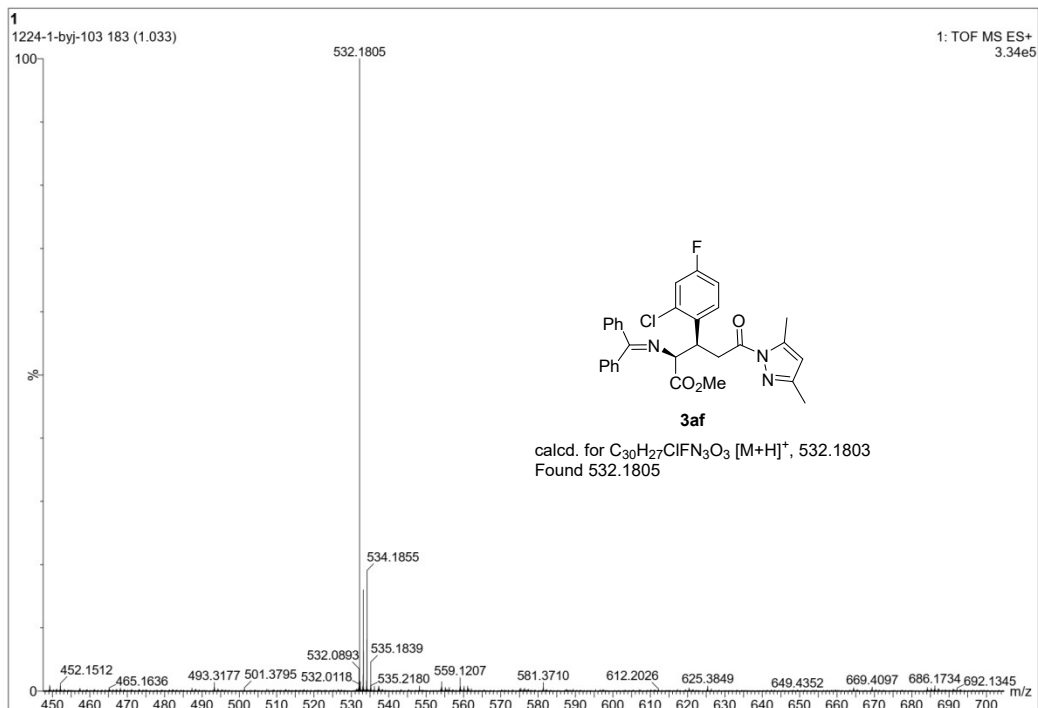

### Single Mass Analysis

Tolerance = 10.0 PPM / DBE: min = -1.5, max = 50.0

Element prediction: Off

Number of isotope peaks used for i-FIT = 3

Monoisotopic Mass, Even Electron Ions

27669 formula(e) evaluated with 1 results within limits (up to 50 best isotopic matches for each mass)

Elements Used:

C: 30-30 H: 28-28 N: 0-6 O: 0-20 F: 0-4 S: 0-4 Cl: 0-4 Mo: 0-1

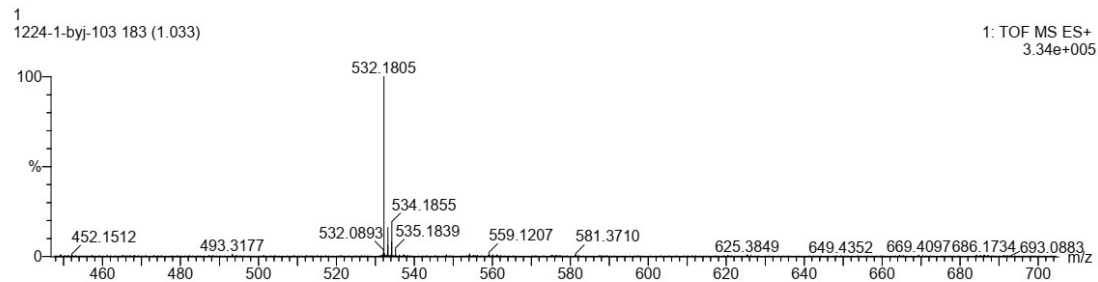

Minimum: -1.5  
Maximum: 5.0 10.0 50.0

| Mass     | Calc. Mass | mDa | PPM | DBE  | i-FIT | Norm | Conf (%) | Formula                                                           |
|----------|------------|-----|-----|------|-------|------|----------|-------------------------------------------------------------------|
| 532.1805 | 532.1803   | 0.2 | 0.4 | 17.5 | 846.7 | n/a  | n/a      | C <sub>30</sub> H <sub>28</sub> N <sub>3</sub> O <sub>3</sub> FCl |

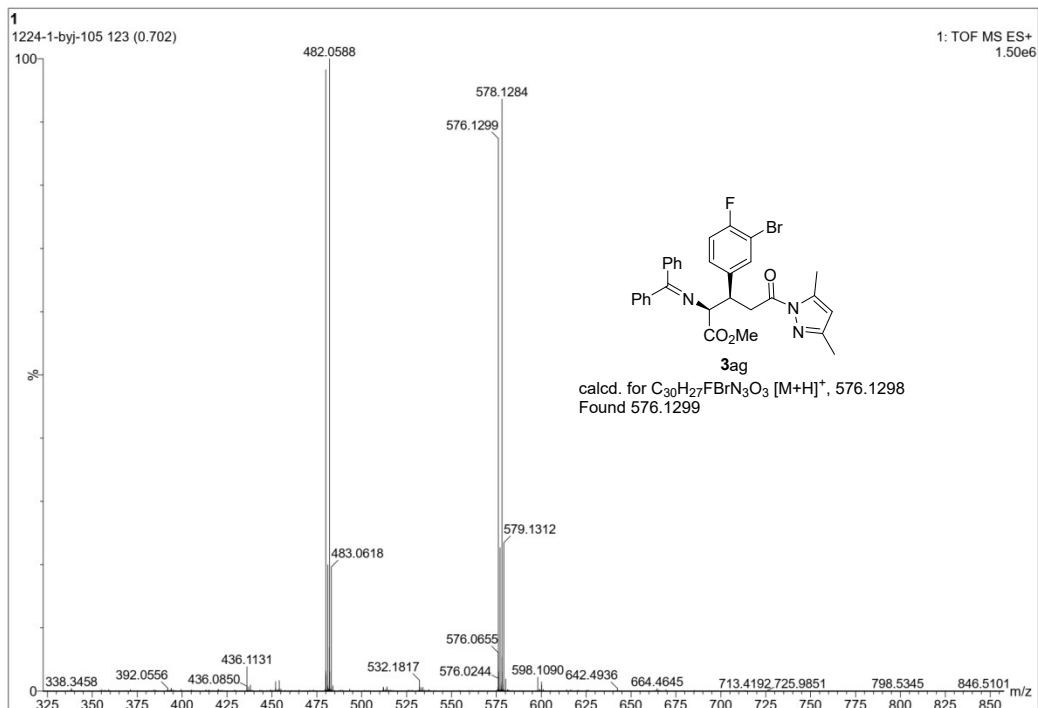

### Single Mass Analysis

Tolerance = 10.0 PPM / DBE: min = -1.5, max = 50.0

Element prediction: Off

Number of isotope peaks used for i-FIT = 3

Monoisotopic Mass, Even Electron Ions

23180 formula(e) evaluated with 1 results within limits (up to 50 best isotopic matches for each mass)

Elements Used:

C: 30-30 H: 28-28 N: 0-6 O: 0-20 F: 0-4 S: 0-4 Br: 0-8 Mo: 0-1

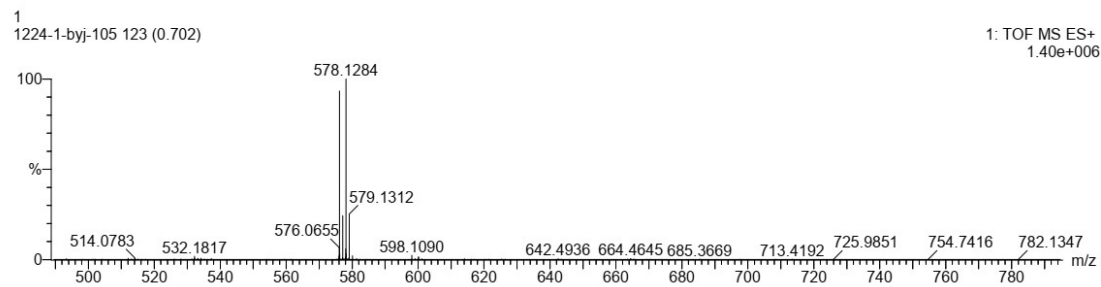

Minimum: -1.5  
Maximum: 50.0

| Mass     | Calc. Mass | mDa | PPM | DBE  | i-FIT | Norm | Conf (%) | Formula                                                            |
|----------|------------|-----|-----|------|-------|------|----------|--------------------------------------------------------------------|
| 576.1299 | 576.1298   | 0.1 | 0.2 | 17.5 | 961.7 | n/a  | n/a      | C <sub>30</sub> H <sub>28</sub> N <sub>3</sub> O <sub>3</sub> F Br |

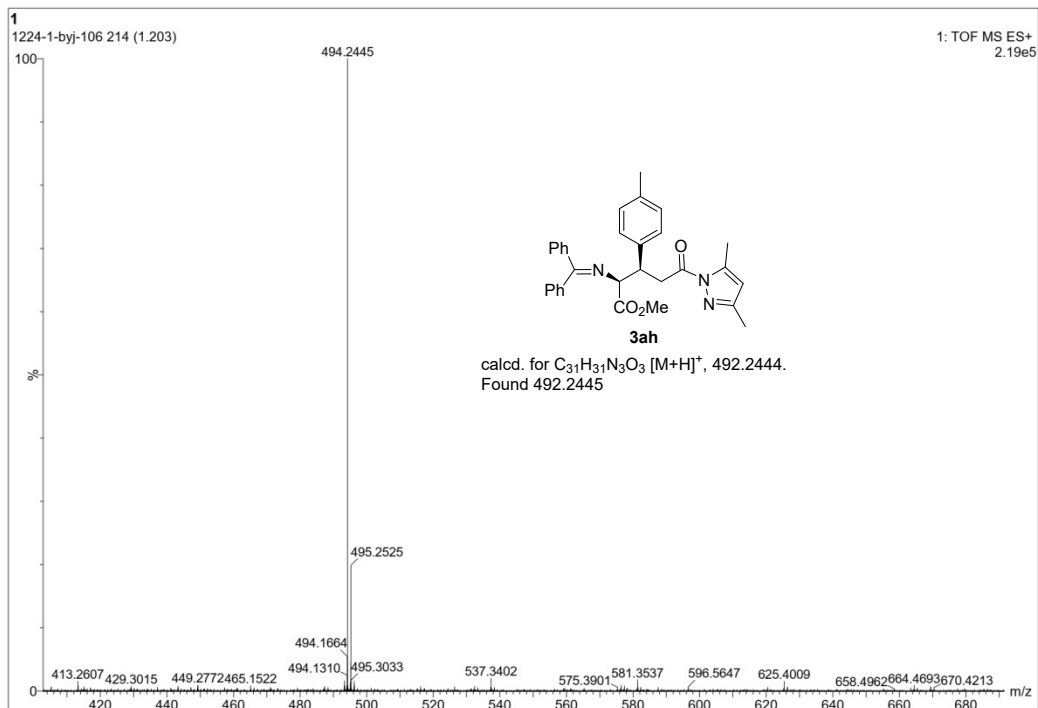

### Single Mass Analysis

Tolerance = 10.0 PPM / DBE: min = -1.5, max = 50.0

Element prediction: Off

Number of isotope peaks used for i-FIT = 3

Monoisotopic Mass, Even Electron Ions

1032 formula(e) evaluated with 1 results within limits (up to 50 best isotopic matches for each mass)

Elements Used:

C: 31-31 H: 0-32 N: 0-6 O: 0-20 Br: 0-8 Mo: 0-1

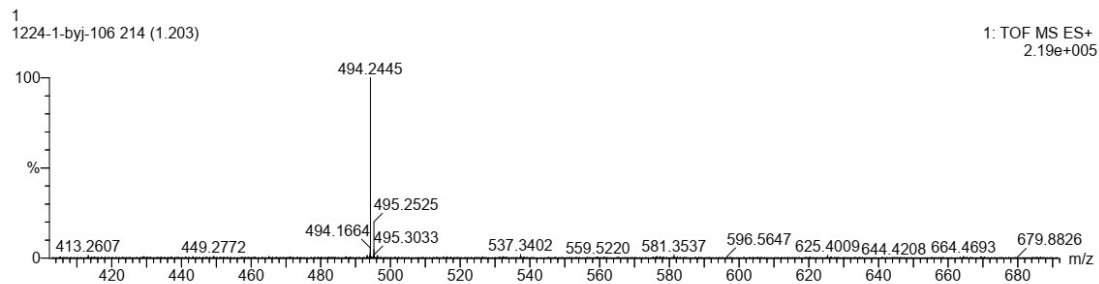

Minimum: -1.5

Maximum: 5.0 10.0 50.0

| Mass     | Calc. Mass | mDa | PPM | DBE  | i-FIT | Norm | Conf (%) | Formula                                                       |
|----------|------------|-----|-----|------|-------|------|----------|---------------------------------------------------------------|
| 494.2445 | 494.2444   | 0.1 | 0.2 | 17.5 | 880.5 | n/a  | n/a      | C <sub>31</sub> H <sub>32</sub> N <sub>3</sub> O <sub>3</sub> |



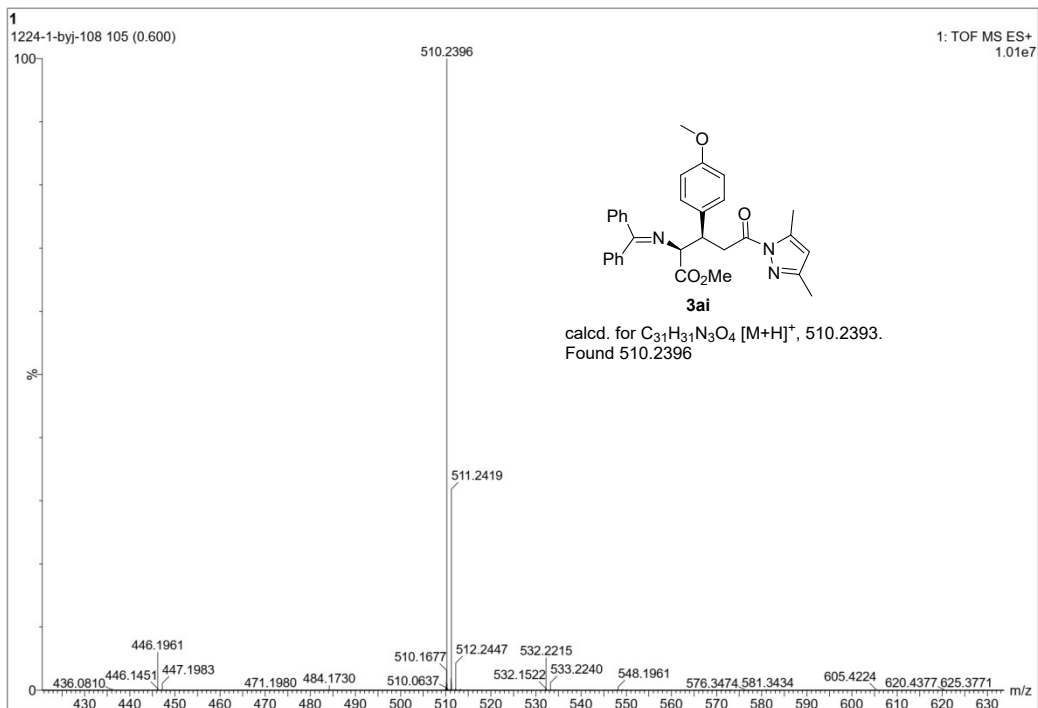

### Single Mass Analysis

Tolerance = 10.0 PPM / DBE: min = -1.5, max = 50.0

Element prediction: Off

Number of isotope peaks used for i-FIT = 3

Monoisotopic Mass, Even Electron Ions

1107 formula(e) evaluated with 1 results within limits (up to 50 best isotopic matches for each mass)

Elements Used:

C: 30-31 H: 0-32 N: 0-6 O: 0-20 Br: 0-8 Mo: 0-1

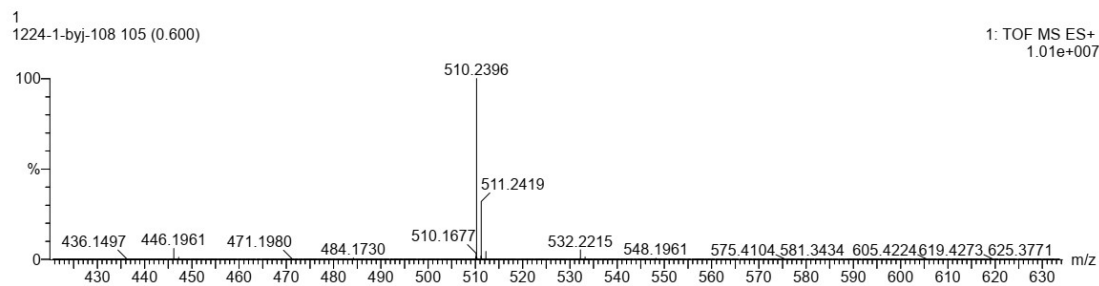

Minimum: -1.5  
Maximum: 50.0

| Mass     | Calc. Mass | mDa | PPM | DBE  | i-FIT  | Norm | Conf (%) | Formula                                                       |
|----------|------------|-----|-----|------|--------|------|----------|---------------------------------------------------------------|
| 510.2396 | 510.2393   | 0.3 | 0.6 | 17.5 | 1092.0 | n/a  | n/a      | C <sub>31</sub> H <sub>32</sub> N <sub>3</sub> O <sub>4</sub> |

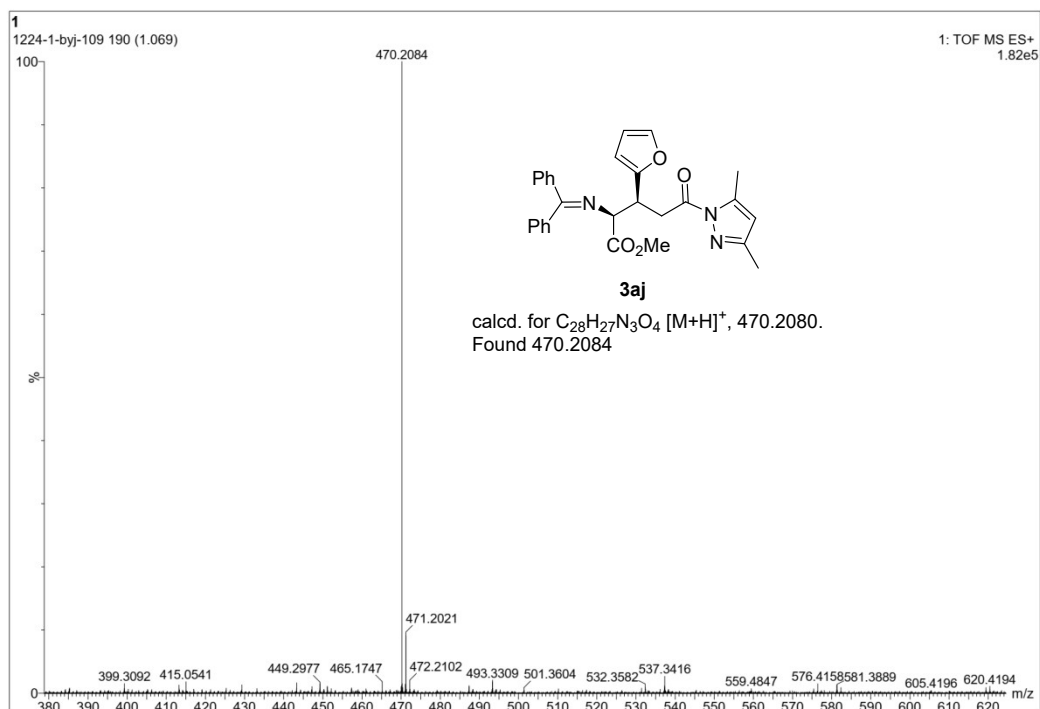

### Single Mass Analysis

Tolerance = 10.0 PPM / DBE: min = -1.5, max = 50.0

Element prediction: Off

Number of isotope peaks used for i-FIT = 3

Monoisotopic Mass, Even Electron Ions

938 formula(e) evaluated with 1 results within limits (up to 50 best isotopic matches for each mass)

Elements Used:

C: 28-28 H: 0-32 N: 0-6 O: 0-20 Br: 0-8 Mo: 0-1

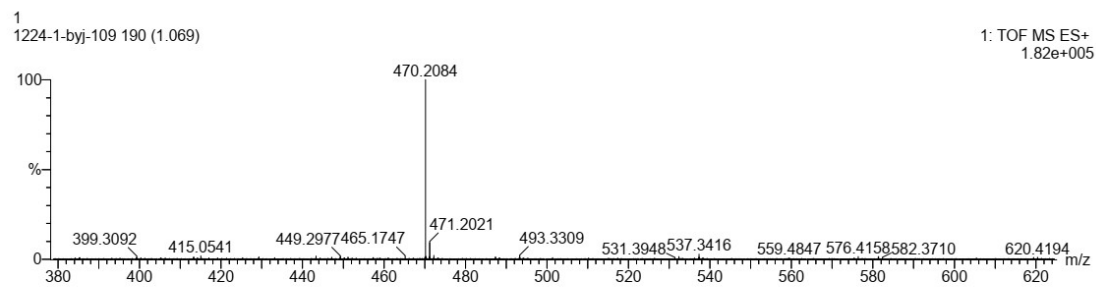

Minimum: -1.5

Maximum: 5.0 10.0 50.0

| Mass     | Calc. Mass | mDa | PPM | DBE  | i-FIT | Norm | Conf (%) | Formula                                                       |
|----------|------------|-----|-----|------|-------|------|----------|---------------------------------------------------------------|
| 470.2084 | 470.2080   | 0.4 | 0.9 | 16.5 | 809.0 | n/a  | n/a      | C <sub>28</sub> H <sub>28</sub> N <sub>3</sub> O <sub>4</sub> |

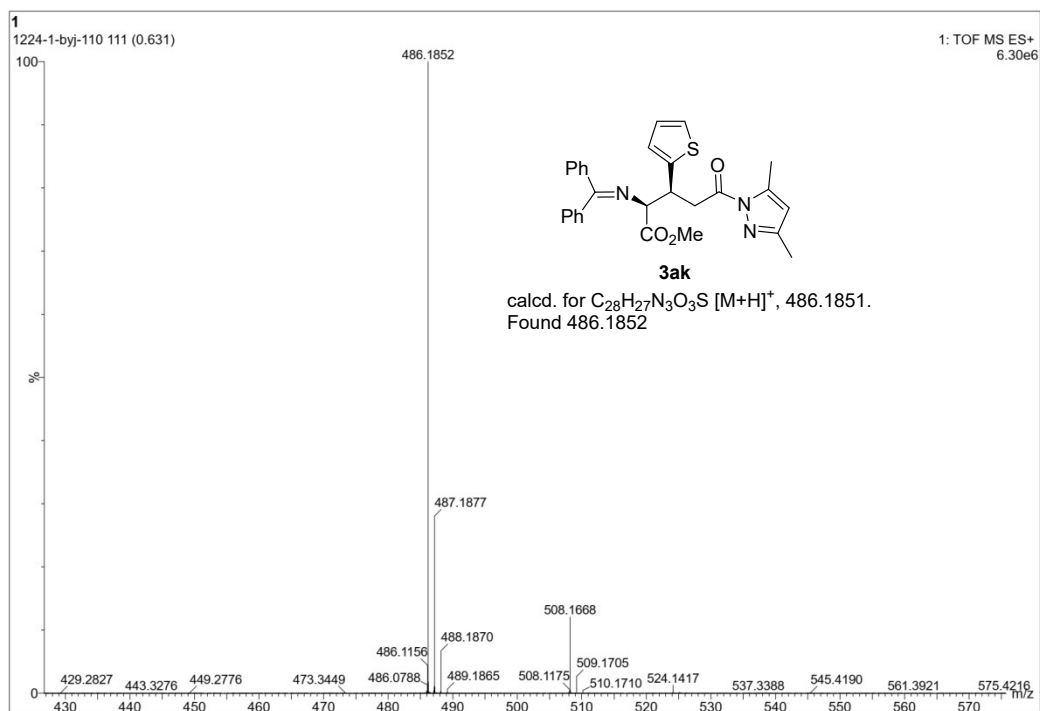

### Single Mass Analysis

Tolerance = 10.0 PPM / DBE: min = -1.5, max = 50.0

Element prediction: Off

Number of isotope peaks used for i-FIT = 3

Monoisotopic Mass, Even Electron Ions

3872 formula(e) evaluated with 1 results within limits (up to 50 best isotopic matches for each mass)

Elements Used:

C: 28-28 H: 0-32 N: 0-6 O: 0-20 S: 0-4 Br: 0-8 Mo: 0-1

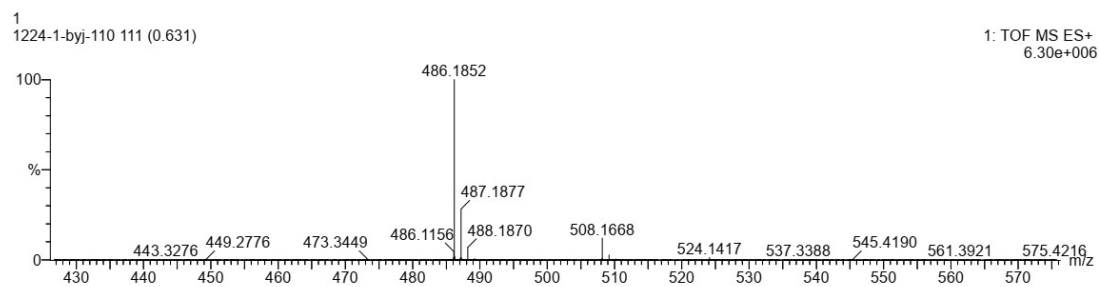

Minimum: -1.5  
Maximum: 5.0 10.0 50.0

| Mass     | Calc. Mass | mDa | PPM | DBE  | i-FIT  | Norm | Conf (%) | Formula                                                         |
|----------|------------|-----|-----|------|--------|------|----------|-----------------------------------------------------------------|
| 486.1852 | 486.1851   | 0.1 | 0.2 | 16.5 | 1115.6 | n/a  | n/a      | C <sub>28</sub> H <sub>28</sub> N <sub>3</sub> O <sub>3</sub> S |

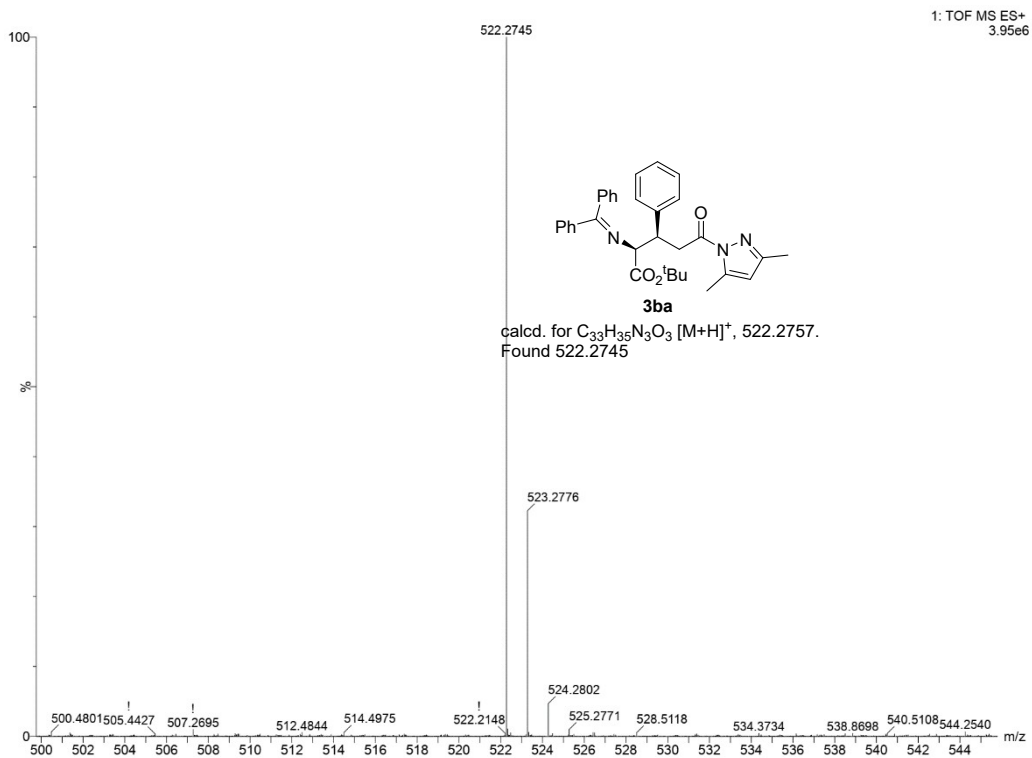

### Single Mass Analysis

Tolerance = 10.0 PPM / DBE: min = -1.5, max = 50.0

Element prediction: Off

Number of isotope peaks used for i-FIT = 3

Monoisotopic Mass, Even Electron Ions

140 formula(e) evaluated with 1 results within limits (up to 50 closest results for each mass)

Elements Used:

C: 33-33 H: 0-50 N: 0-8 O: 0-8 Na: 0-1

BYJ-1 362 (3.291)

1: TOF MS ES+

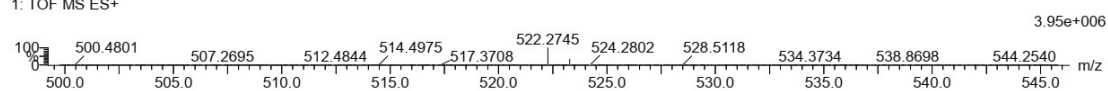

Minimum: -1.5  
Maximum: 20.0 10.0 50.0

| Mass     | Calc. Mass | mDa  | PPM  | DBE  | i-FIT  | Norm | Conf (%) | Formula       |
|----------|------------|------|------|------|--------|------|----------|---------------|
| 522.2745 | 522.2757   | -1.2 | -2.3 | 17.5 | 1012.7 | n/a  | n/a      | C33 H36 N3 O3 |

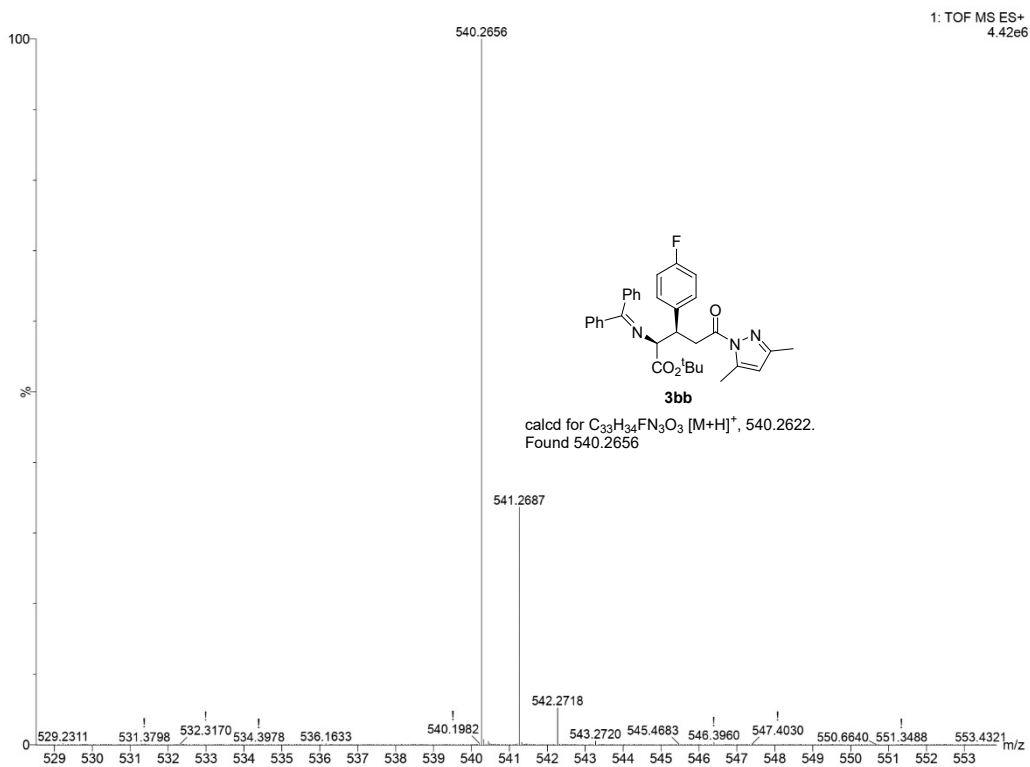

### Single Mass Analysis

Tolerance = 10.0 PPM / DBE: min = -1.5, max = 50.0

Element prediction: Off

Number of isotope peaks used for i-FIT = 3

Monoisotopic Mass, Even Electron Ions

54 formula(e) evaluated with 1 results within limits (up to 50 closest results for each mass)

Elements Used:

C: 31-31 H: 0-50 N: 0-5 O: 0-5 Na: 0-1

BYJ-7 210 (1.174)

1: TOF MS ES+

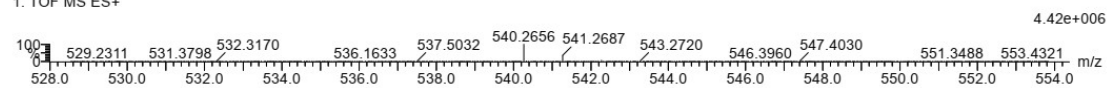

Minimum: -1.5  
Maximum: 20.0 10.0 50.0

| Mass     | Calc. Mass | mDa | PPM | DBE  | i-FIT | Norm | Conf(%) | Formula       |
|----------|------------|-----|-----|------|-------|------|---------|---------------|
| 540.2656 | 540.2611   | 4.5 | 8.3 | 17.5 | 886.4 | n/a  | n/a     | C31 H34 N5 O4 |

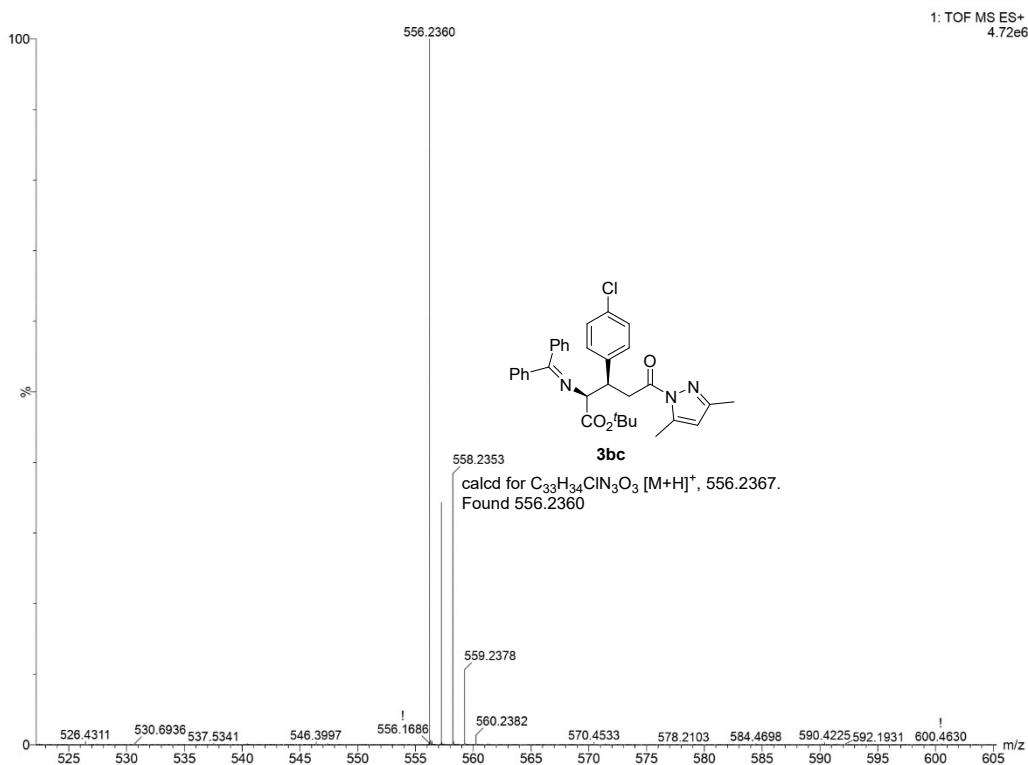

### Single Mass Analysis

Tolerance = 10.0 PPM / DBE: min = -1.5, max = 50.0

Element prediction: Off

Number of isotope peaks used for i-FIT = 3

Monoisotopic Mass, Even Electron Ions

113 formula(e) evaluated with 1 results within limits (up to 50 closest results for each mass)

Elements Used:

C: 33-33 H: 0-50 N: 0-5 O: 0-5 Na: 0-1 Cl: 1-2

BYJ-10 236 (1.318)

1: TOF MS ES+

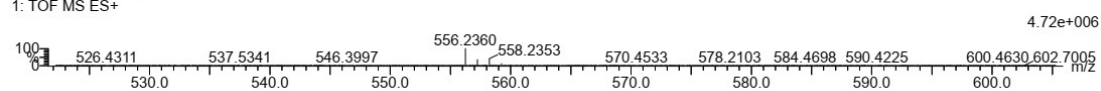

Minimum: -1.5  
Maximum: 20.0 10.0 50.0

| Mass     | Calc. Mass | mDa  | PPM  | DBE  | i-FIT | Norm | Conf (%) | Formula          |
|----------|------------|------|------|------|-------|------|----------|------------------|
| 556.2360 | 556.2367   | -0.7 | -1.3 | 17.5 | 882.5 | n/a  | n/a      | C33 H35 N3 O3 Cl |

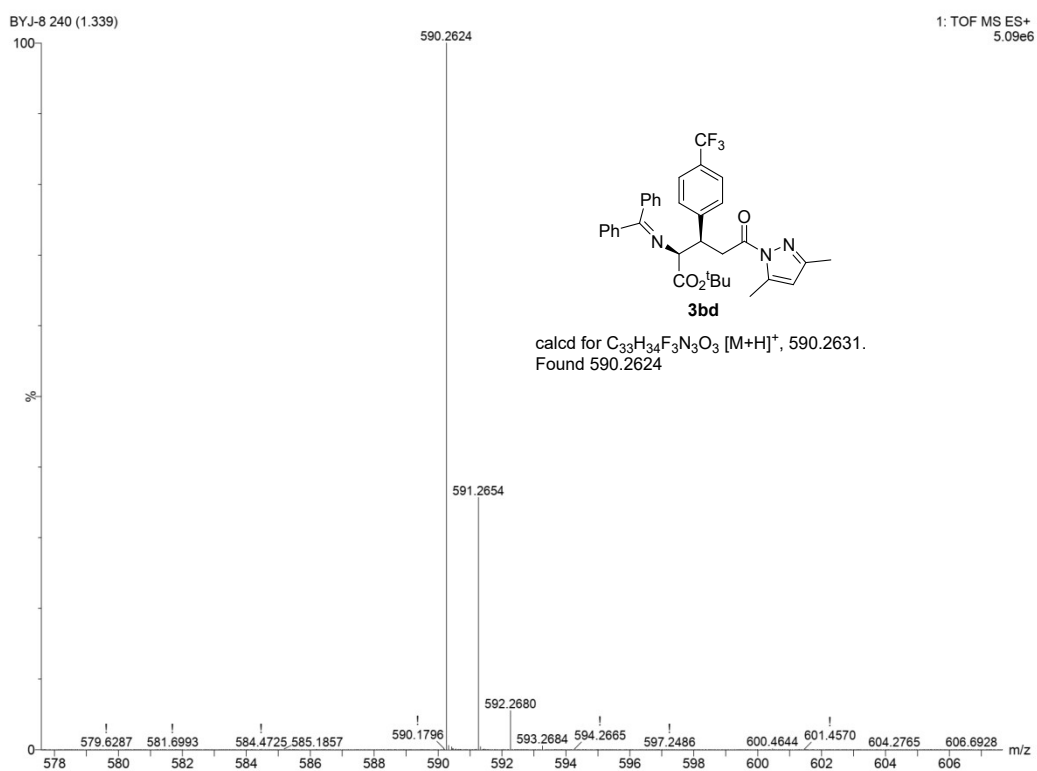

### Single Mass Analysis

Tolerance = 10.0 PPM / DBE: min = -1.5, max = 50.0

Element prediction: Off

Number of isotope peaks used for i-FIT = 3

Monoisotopic Mass, Even Electron Ions

156 formula(e) evaluated with 1 results within limits (up to 50 closest results for each mass)

Elements Used:

C: 34-34 H: 0-50 N: 0-5 O: 0-5 Na: 0-1 F: 1-3

BYJ-8 240 (1.339)

1: TOF MS ES+

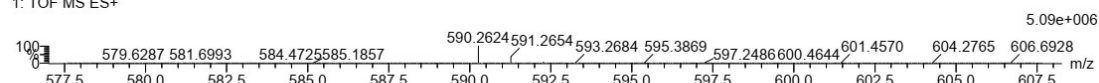

Minimum: -1.5  
Maximum: 20.0 10.0 50.0

| Mass     | Calc. Mass | mDa  | PPM  | DBE  | i-FIT | Norm | Conf (%) | Formula                                                                      |
|----------|------------|------|------|------|-------|------|----------|------------------------------------------------------------------------------|
| 590.2624 | 590.2631   | -0.7 | -1.2 | 17.5 | 859.2 | n/a  | n/a      | C <sub>34</sub> H <sub>35</sub> N <sub>3</sub> O <sub>3</sub> F <sub>3</sub> |

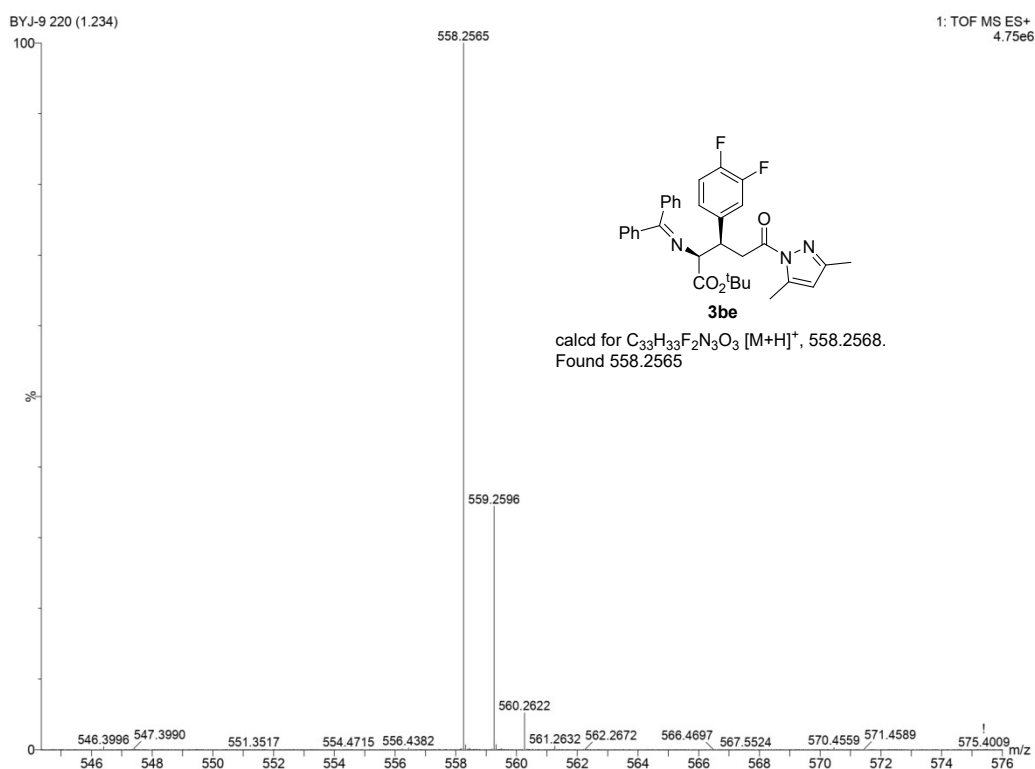

### Single Mass Analysis

Tolerance = 10.0 PPM / DBE: min = -1.5, max = 50.0

Element prediction: Off

Number of isotope peaks used for i-FIT = 3

Monoisotopic Mass, Even Electron Ions

107 formula(e) evaluated with 1 results within limits (up to 50 closest results for each mass)

Elements Used:

C: 33-33 H: 0-50 N: 0-5 O: 0-5 F: 1-2 Na: 0-1

BYJ-9 220 (1.234)

1: TOF MS ES+

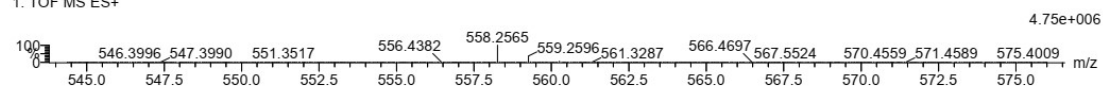

Minimum: -1.5

Maximum: 20.0 10.0 50.0

| Mass     | Calc. Mass | mDa  | PPM  | DBE  | i-FIT | Norm | Conf(%) | Formula          |
|----------|------------|------|------|------|-------|------|---------|------------------|
| 558.2565 | 558.2568   | -0.3 | -0.5 | 17.5 | 879.2 | n/a  | n/a     | C33 H34 N3 O3 F2 |



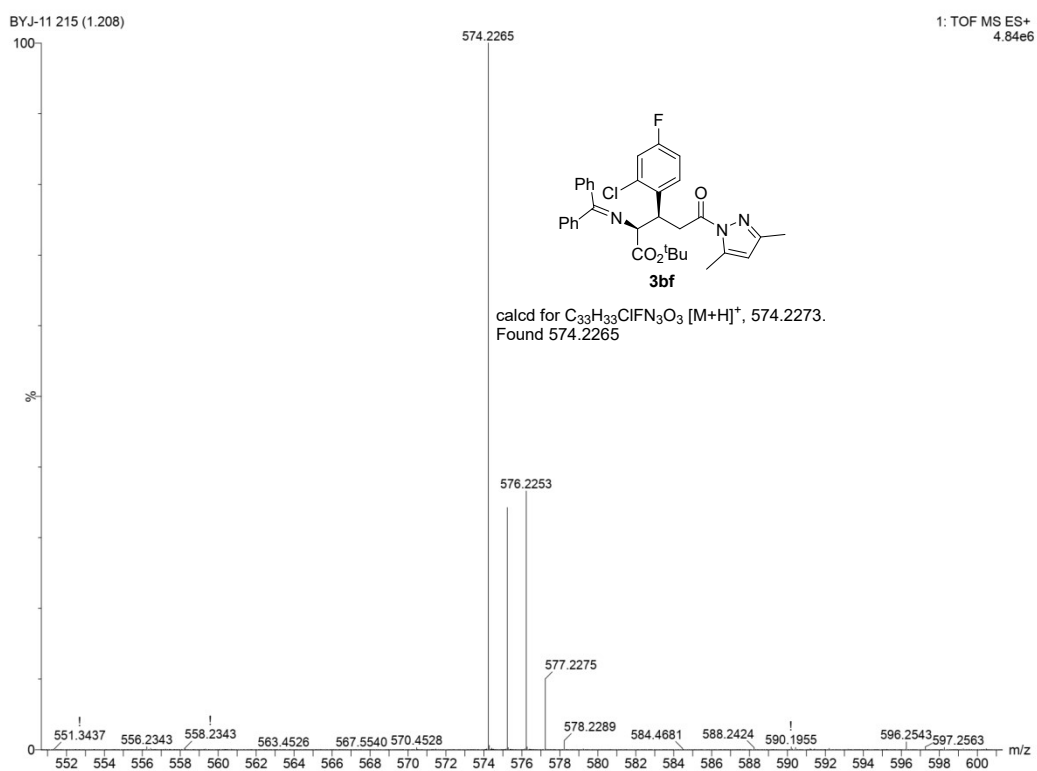

### Single Mass Analysis

Tolerance = 10.0 PPM / DBE: min = -1.5, max = 50.0

Element prediction: Off

Number of isotope peaks used for i-FIT = 3

Monoisotopic Mass, Even Electron Ions

116 formula(e) evaluated with 1 results within limits (up to 50 closest results for each mass)

Elements Used:

C: 33-33 H: 0-50 N: 0-5 O: 0-5 Na: 0-1 Cl: 1-2 F: 1-1

BYJ-11 215 (1.208)

1: TOF MS ES+

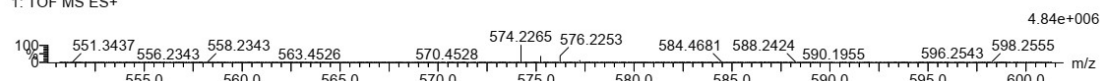

Minimum: -1.5  
Maximum: 20.0 10.0 50.0

| Mass     | Calc. Mass | mDa  | PPM  | DBE  | i-FIT | Norm | Conf (%) | Formula                                                            |
|----------|------------|------|------|------|-------|------|----------|--------------------------------------------------------------------|
| 574.2265 | 574.2273   | -0.8 | -1.4 | 17.5 | 926.4 | n/a  | n/a      | C <sub>33</sub> H <sub>34</sub> N <sub>3</sub> O <sub>3</sub> Cl F |

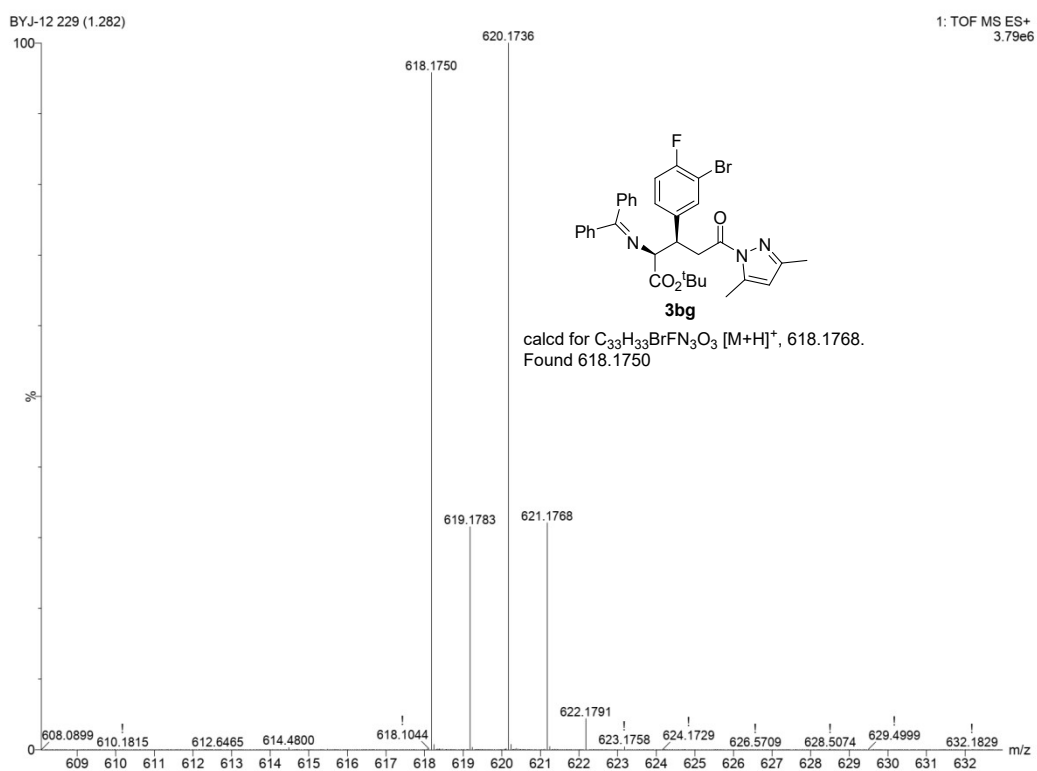

### Single Mass Analysis

Tolerance = 10.0 PPM / DBE: min = -1.5, max = 50.0

Element prediction: Off

Number of isotope peaks used for i-FIT = 3

Monoisotopic Mass, Even Electron Ions

125 formula(e) evaluated with 1 results within limits (up to 50 closest results for each mass)

Elements Used:

C: 33-33 H: 0-50 N: 0-5 O: 0-5 F: 1-1 Na: 0-1 Br: 1-2

BYJ-12 229 (1.282)

1: TOF MS ES+

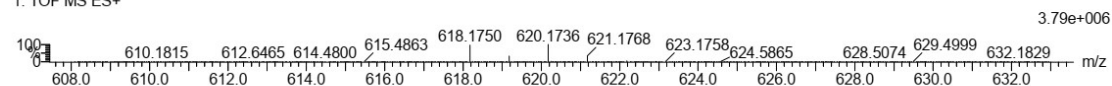

Minimum: -1.5  
Maximum: 20.0 10.0 50.0

| Mass     | Calc. Mass | mDa  | PPM  | DBE  | i-FIT | Norm | Conf (%) | Formula                                                            |
|----------|------------|------|------|------|-------|------|----------|--------------------------------------------------------------------|
| 618.1750 | 618.1768   | -1.8 | -2.9 | 17.5 | 914.3 | n/a  | n/a      | C <sub>33</sub> H <sub>34</sub> N <sub>3</sub> O <sub>3</sub> F Br |

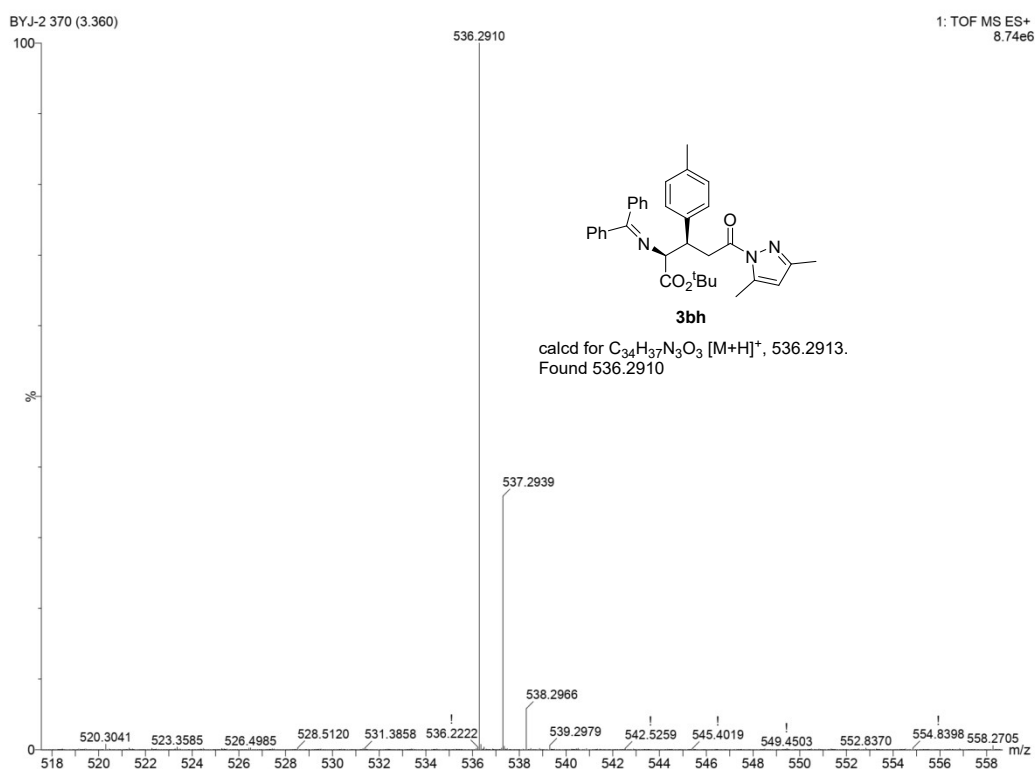

### Single Mass Analysis

Tolerance = 10.0 PPM / DBE: min = -1.5, max = 50.0

Element prediction: Off

Number of isotope peaks used for i-FIT = 3

Monoisotopic Mass, Even Electron Ions

180 formula(e) evaluated with 1 results within limits (up to 50 closest results for each mass)

Elements Used:

C: 33-34 H: 0-50 N: 0-8 O: 0-8 Na: 0-1

BYJ-2 370 (3.360)

1: TOF MS ES+

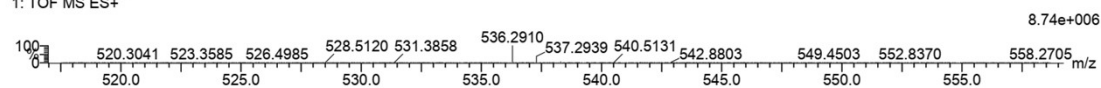

Minimum: -1.5

Maximum: 20.0 10.0 50.0

| Mass     | Calc. Mass | mDa  | PPM  | DBE  | i-FIT | Norm | Conf (%) | Formula                                                       |
|----------|------------|------|------|------|-------|------|----------|---------------------------------------------------------------|
| 536.2910 | 536.2913   | -0.3 | -0.6 | 17.5 | 967.8 | n/a  | n/a      | C <sub>34</sub> H <sub>38</sub> N <sub>3</sub> O <sub>3</sub> |

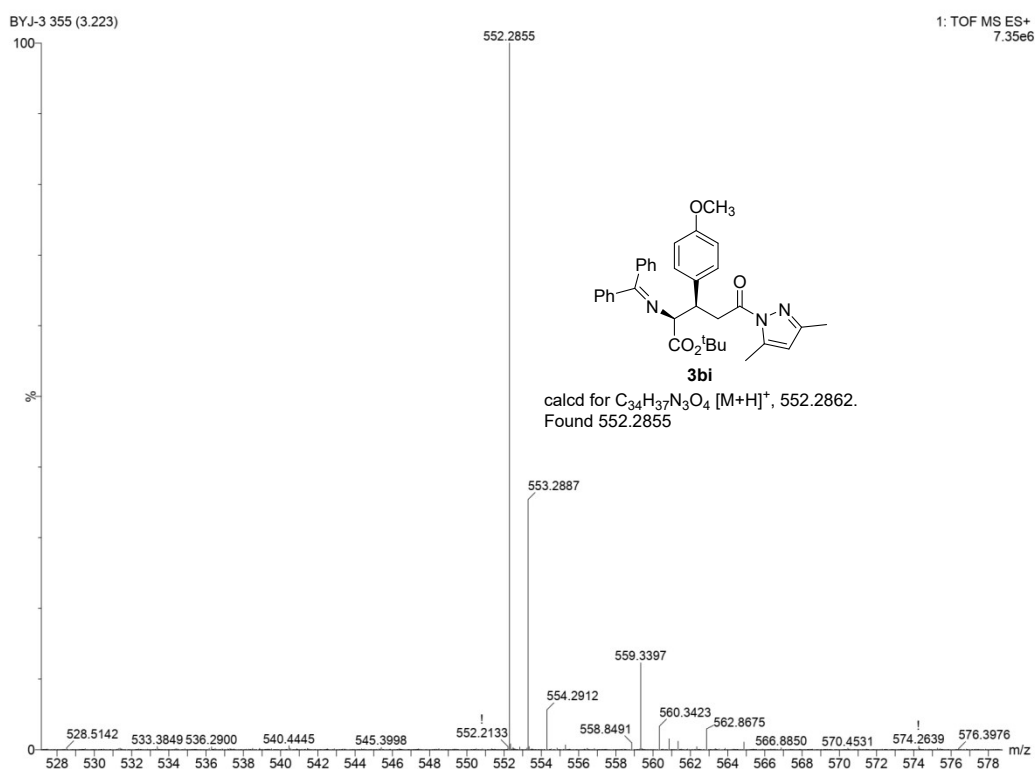

### Single Mass Analysis

Tolerance = 10.0 PPM / DBE: min = -1.5, max = 50.0

Element prediction: Off

Number of isotope peaks used for i-FIT = 3

Monoisotopic Mass, Even Electron Ions

69 formula(e) evaluated with 1 results within limits (up to 50 closest results for each mass)

Elements Used:

C: 33-34 H: 0-50 N: 0-5 O: 0-5 Na: 0-1

BYJ-3 355 (3.223)

1: TOF MS ES+

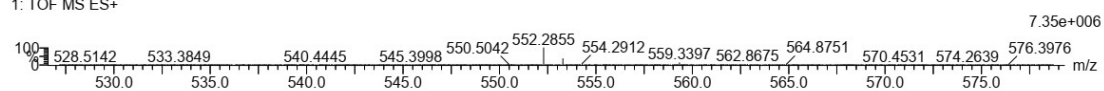

Minimum: -1.5  
Maximum: 20.0 10.0 50.0

| Mass     | Calc. Mass | mDa  | PPM  | DBE  | i-FIT | Norm | Conf (%) | Formula                                                       |
|----------|------------|------|------|------|-------|------|----------|---------------------------------------------------------------|
| 552.2855 | 552.2862   | -0.7 | -1.3 | 17.5 | 939.4 | n/a  | n/a      | C <sub>34</sub> H <sub>38</sub> N <sub>3</sub> O <sub>4</sub> |

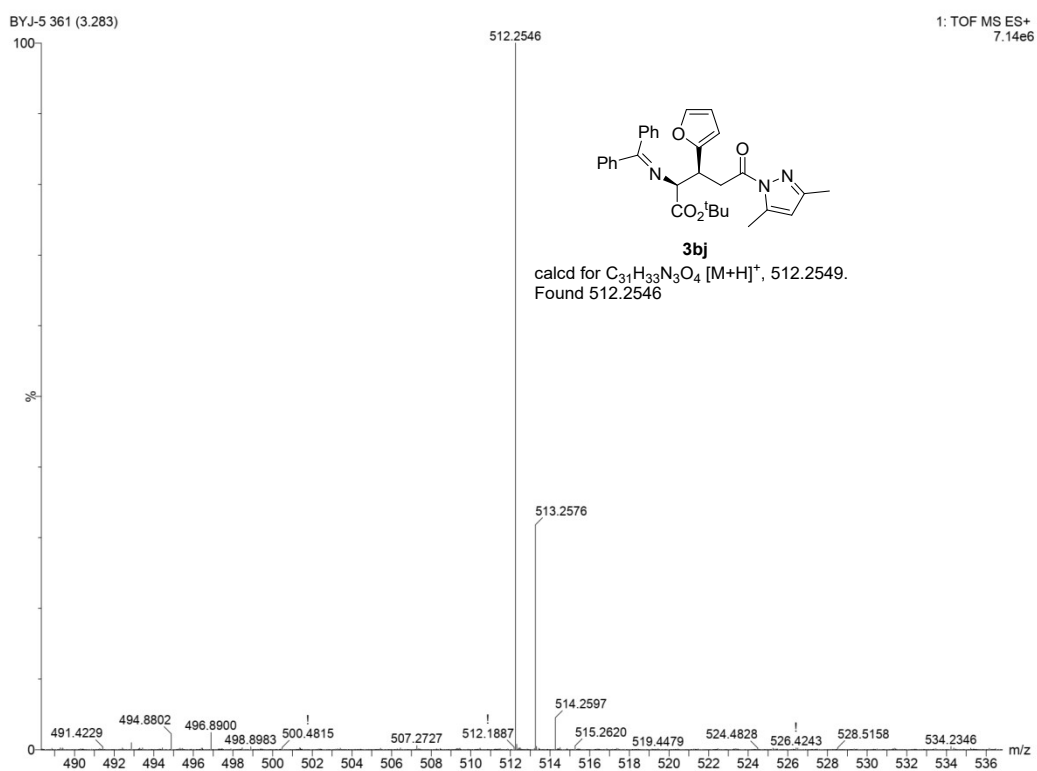

### Single Mass Analysis

Tolerance = 10.0 PPM / DBE: min = -1.5, max = 50.0

Element prediction: Off

Number of isotope peaks used for i-FIT = 3

Monoisotopic Mass, Even Electron Ions

53 formula(e) evaluated with 1 results within limits (up to 50 closest results for each mass)

Elements Used:

C: 31-31 H: 0-50 N: 0-5 O: 0-5 Na: 0-1

BYJ-5 361 (3.283)

1: TOF MS ES+

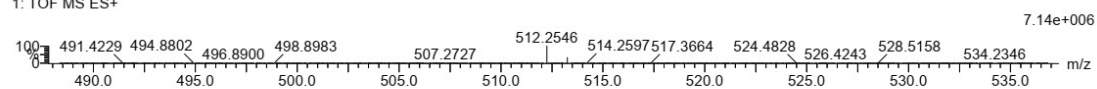

Minimum: -1.5

Maximum: 50.0

| Mass     | Calc. Mass | mDa  | PPM  | DBE  | i-FIT  | Norm | Conf (%) | Formula                                                       |
|----------|------------|------|------|------|--------|------|----------|---------------------------------------------------------------|
| 512.2546 | 512.2549   | -0.3 | -0.6 | 16.5 | 1007.8 | n/a  | n/a      | C <sub>31</sub> H <sub>34</sub> N <sub>3</sub> O <sub>4</sub> |

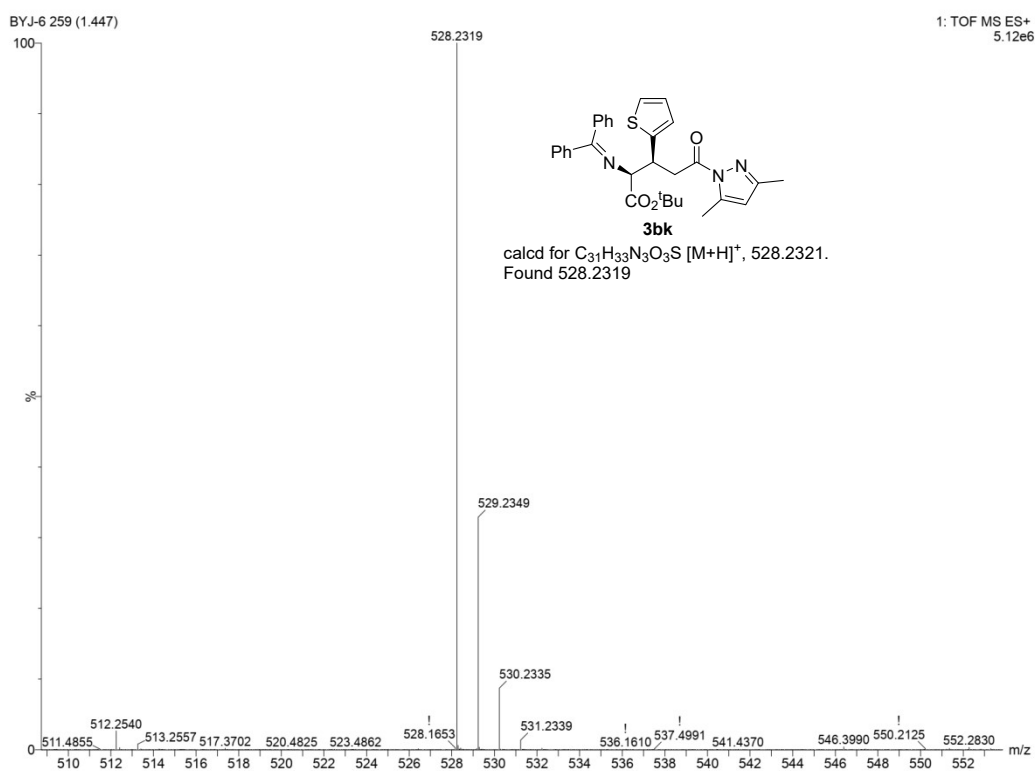

### Single Mass Analysis

Tolerance = 10.0 PPM / DBE: min = -1.5, max = 50.0

Element prediction: Off

Number of isotope peaks used for i-FIT = 3

Monoisotopic Mass, Even Electron Ions

109 formula(e) evaluated with 1 results within limits (up to 50 closest results for each mass)

Elements Used:

C: 31-31 H: 0-50 N: 0-5 O: 0-5 Na: 0-1 S: 0-1

BYJ-6 259 (1.447)

1: TOF MS ES+

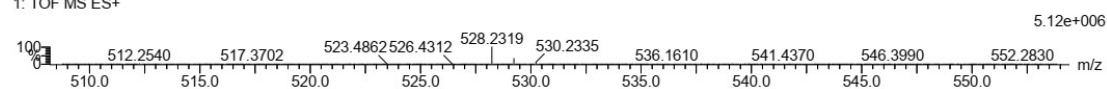

Minimum: -1.5  
Maximum: 20.0 10.0 50.0

| Mass      | Calc. Mass | mDa  | PPM  | DBE  | i-FIT | Norm | Conf(%) | Formula         |
|-----------|------------|------|------|------|-------|------|---------|-----------------|
| 528, 2319 | 528, 2321  | -0.2 | -0.4 | 16.5 | 897.8 | n/a  | n/a     | C31 H34 N3 O3 S |

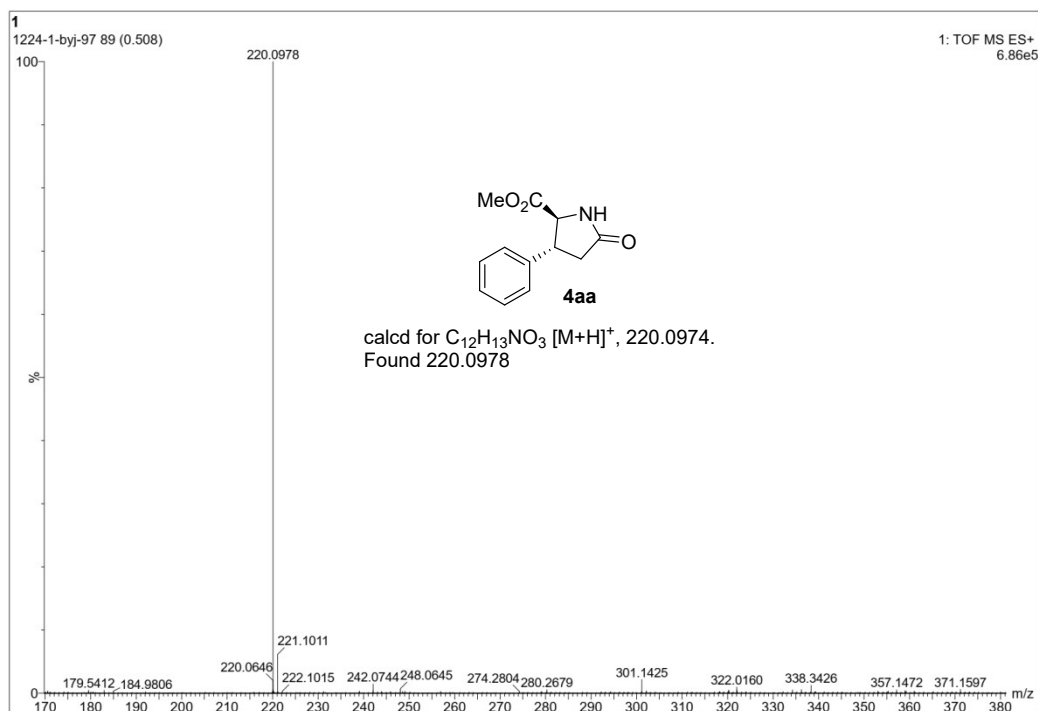

### Single Mass Analysis

Tolerance = 10.0 PPM / DBE: min = -1.5, max = 50.0

Element prediction: Off

Number of isotope peaks used for i-FIT = 3

Monoisotopic Mass, Even Electron Ions

80 formula(e) evaluated with 1 results within limits (up to 50 best isotopic matches for each mass)

Elements Used:

C: 12-12 H: 0-35 N: 0-6 O: 0-20

1

1224-1-byj-97 89 (0.508)

1: TOF MS ES+  
6.86e+005

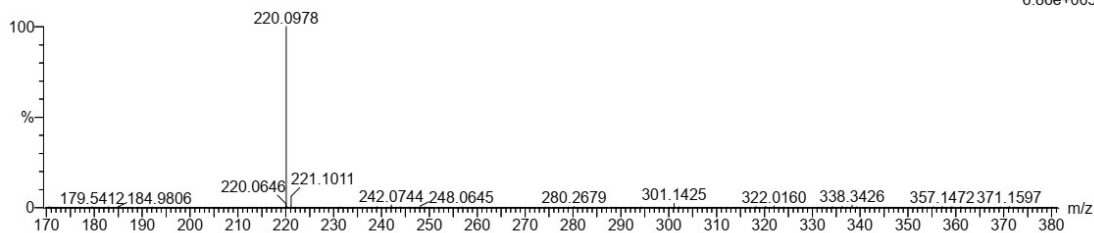

Minimum: -1.5  
Maximum: 50.0

| Mass     | Calc. Mass | mDa | PPM | DBE | i-FIT  | Norm | Conf (%) | Formula      |
|----------|------------|-----|-----|-----|--------|------|----------|--------------|
| 220.0978 | 220.0974   | 0.4 | 1.8 | 6.5 | 1190.7 | n/a  | n/a      | C12 H14 N O3 |

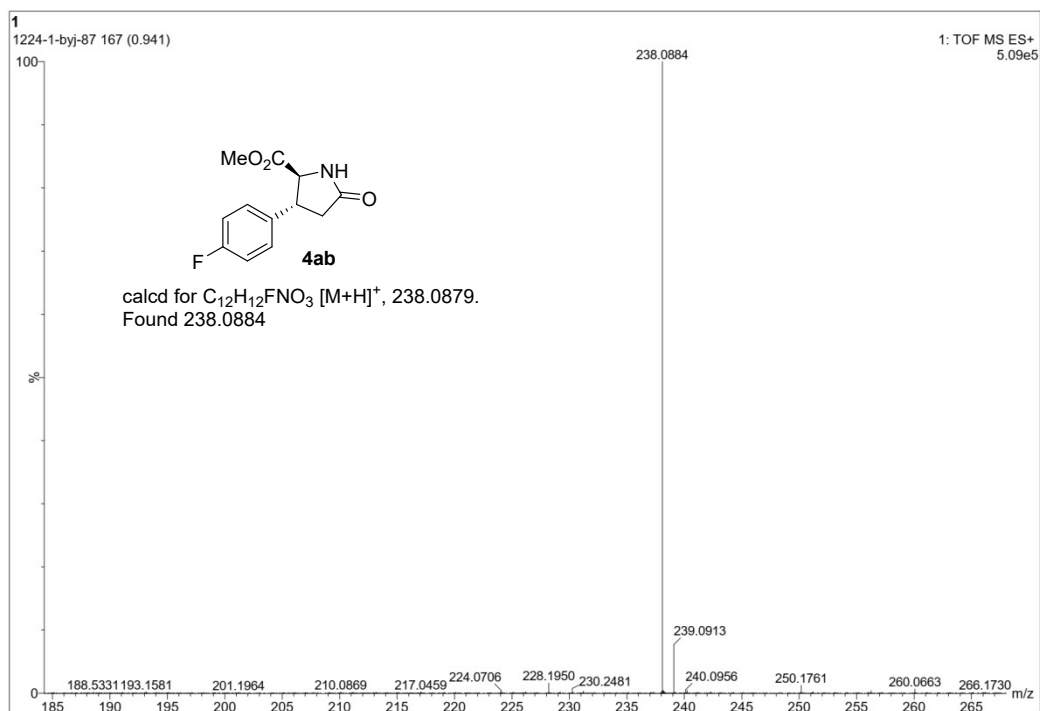

### Single Mass Analysis

Tolerance = 10.0 PPM / DBE: min = -1.5, max = 50.0

Element prediction: Off

Number of isotope peaks used for i-FIT = 3

Monoisotopic Mass, Even Electron Ions

3087 formula(e) evaluated with 1 results within limits (up to 50 best isotopic matches for each mass)

Elements Used:

C: 12-12 H: 13-13 N: 0-6 O: 0-20 S: 0-4 Cl: 0-4 Mo: 0-1 F: 0-4

1  
1224-1-byj-87 167 (0.941)

1: TOF MS ES+  
5.09e+005

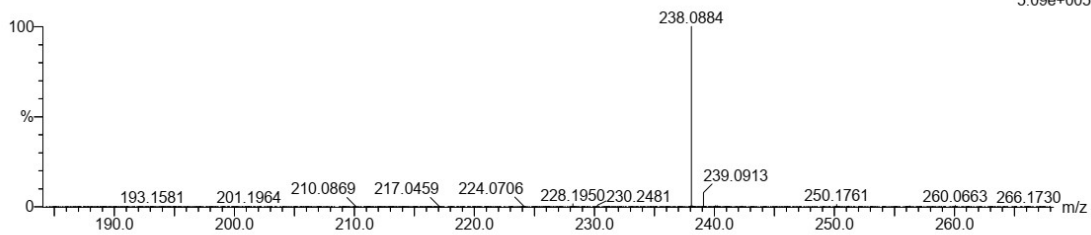

Minimum: -1.5  
Maximum: 5.0 10.0 50.0

| Mass     | Calc. Mass | mDa | PPM | DBE | i-FIT | Norm | Conf (%) | Formula        |
|----------|------------|-----|-----|-----|-------|------|----------|----------------|
| 238.0884 | 238.0879   | 0.5 | 2.1 | 6.5 | 844.2 | n/a  | n/a      | C12 H13 N O3 F |



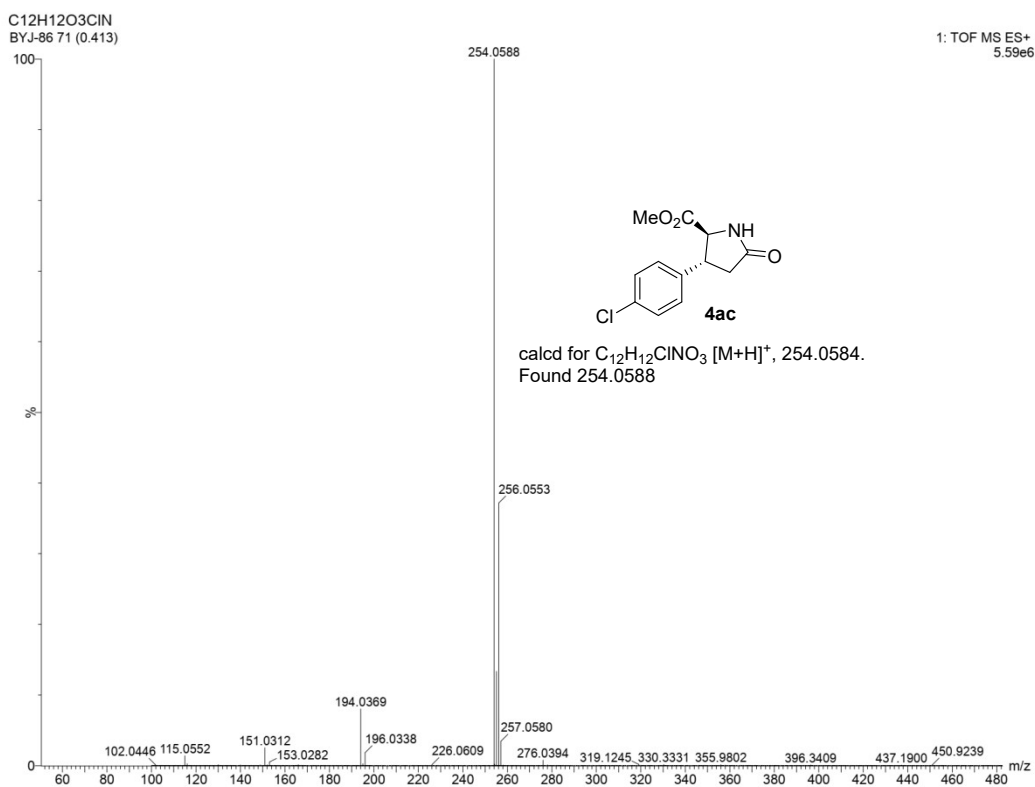

### Single Mass Analysis

Tolerance = 10.0 PPM / DBE: min = -1.5, max = 50.0

Element prediction: Off

Number of isotope peaks used for i-FIT = 3

Monoisotopic Mass, Even Electron Ions

147 formula(e) evaluated with 1 results within limits (up to 50 best isotopic matches for each mass)

Elements Used:

C: 12-12 H: 0-75 N: 0-6 O: 0-12 Si: 0-1 Cl: 1-1

C<sub>12</sub>H<sub>12</sub>O<sub>3</sub>ClN

BYJ-86 71 (0.413)

1: TOF MS ES+  
5.59e+006

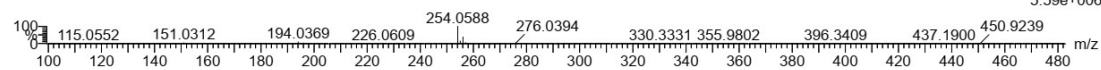

Minimum: -1.5  
Maximum: 5.0 10.0 50.0

| Mass     | Calc. Mass | mDa | PPM | DBE | i-FIT  | Norm | Conf (%) | Formula         |
|----------|------------|-----|-----|-----|--------|------|----------|-----------------|
| 254.0588 | 254.0584   | 0.4 | 1.6 | 6.5 | 1187.6 | n/a  | n/a      | C12 H13 N O3 Cl |

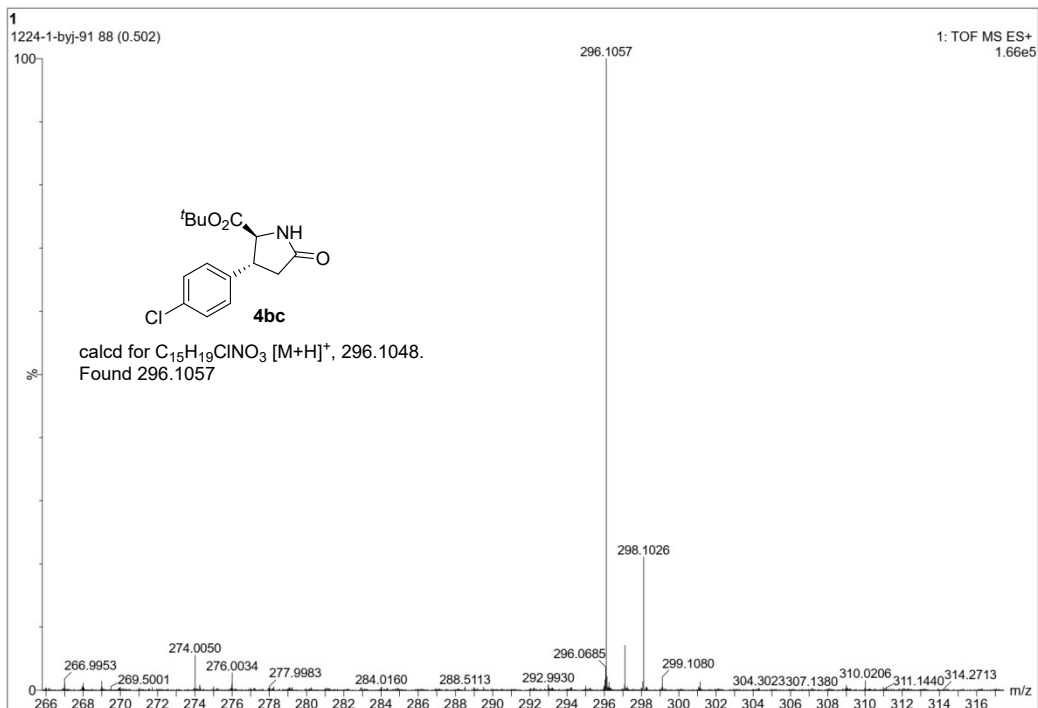

### Single Mass Analysis

Tolerance = 10.0 PPM / DBE: min = -1.5, max = 50.0

Element prediction: Off

Number of isotope peaks used for i-FIT = 3

Monoisotopic Mass, Even Electron Ions

6597 formula(e) evaluated with 1 results within limits (up to 50 best isotopic matches for each mass)

Elements Used:

C: 15-15 H: 0-20 N: 0-6 O: 0-20 F: 0-4 S: 0-4 Cl: 0-4 Mo: 0-1

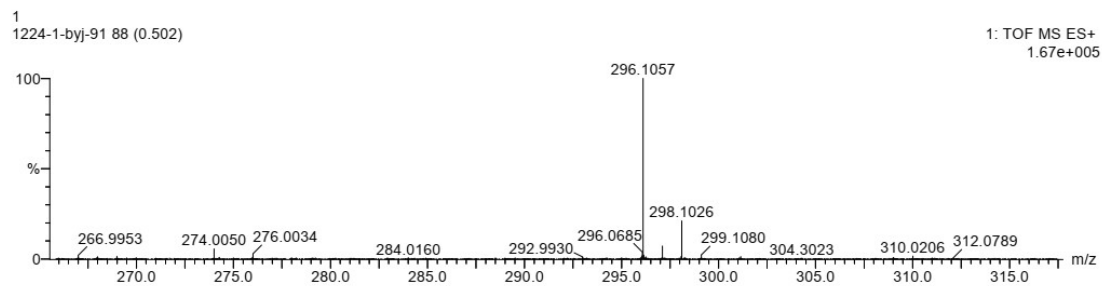

Minimum: -1.5  
Maximum: 5.0 10.0 50.0

| Mass     | Calc. Mass | mDa | PPM | DBE | i-FIT | Norm | Conf(%) | Formula                                             |
|----------|------------|-----|-----|-----|-------|------|---------|-----------------------------------------------------|
| 296.1057 | 296.1053   | 0.4 | 1.4 | 6.5 | 949.3 | n/a  | n/a     | C <sub>15</sub> H <sub>19</sub> N O <sub>3</sub> Cl |

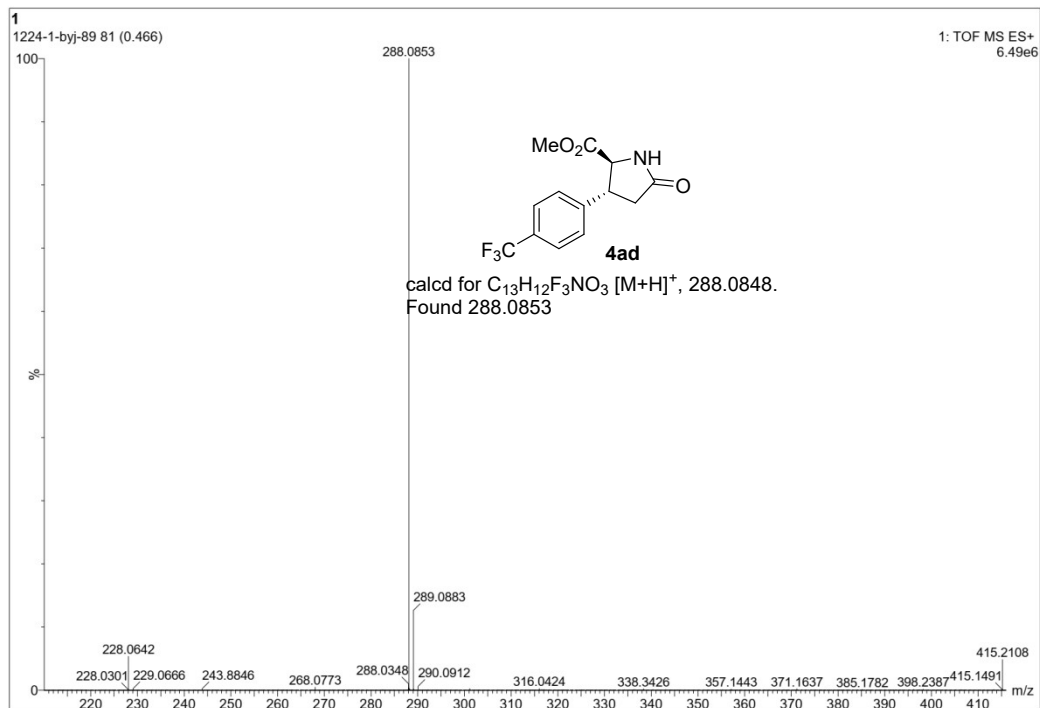

### Single Mass Analysis

Tolerance = 10.0 PPM / DBE: min = -1.5, max = 50.0

Element prediction: Off

Number of isotope peaks used for i-FIT = 3

Monoisotopic Mass, Even Electron Ions

5786 formula(e) evaluated with 1 results within limits (up to 50 best isotopic matches for each mass)

Elements Used:

C: 13-13 H: 13-13 N: 0-6 O: 0-20 F: 0-4 S: 0-4 Cl: 0-4 Mo: 0-1

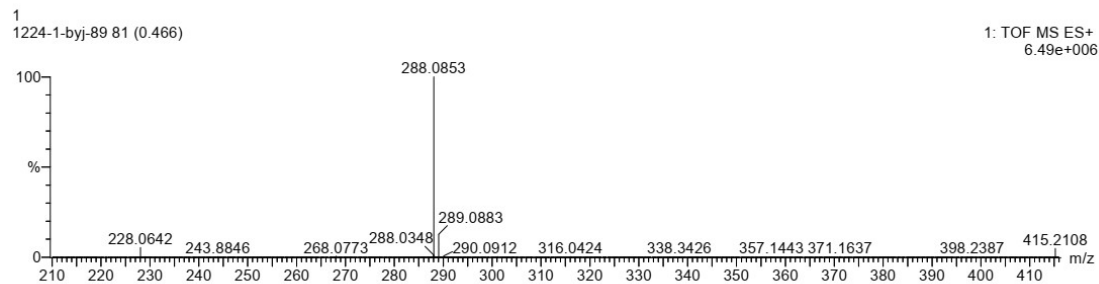

Minimum: -1.5  
 Maximum: 50.0

| Mass     | Calc. Mass | mDa | PPM | DBE | i-FIT  | Norm | Conf(%) | Formula         |
|----------|------------|-----|-----|-----|--------|------|---------|-----------------|
| 288.0853 | 288.0848   | 0.5 | 1.7 | 6.5 | 1329.7 | n/a  | n/a     | C13 H13 N 03 F3 |

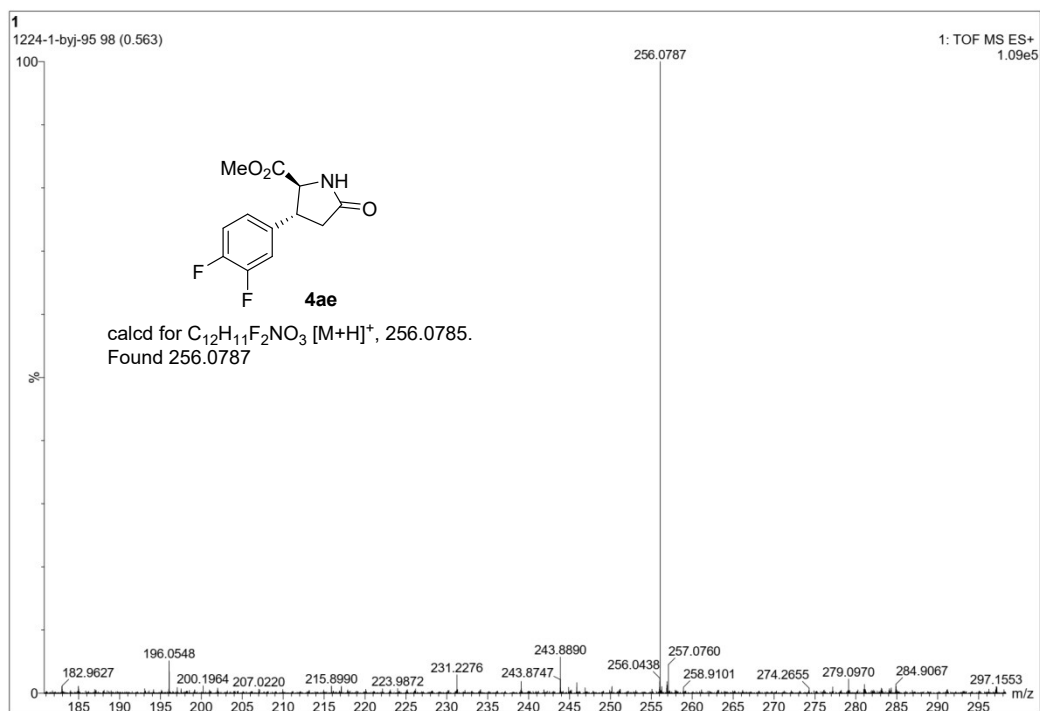

### Single Mass Analysis

Tolerance = 10.0 PPM / DBE: min = -1.5, max = 50.0

Element prediction: Off

Number of isotope peaks used for i-FIT = 3

Monoisotopic Mass, Even Electron Ions

3932 formula(e) evaluated with 1 results within limits (up to 50 best isotopic matches for each mass)

Elements Used:

C: 12-12 H: 12-12 N: 0-6 O: 0-20 S: 0-4 Cl: 0-4 Mo: 0-1 F: 0-4

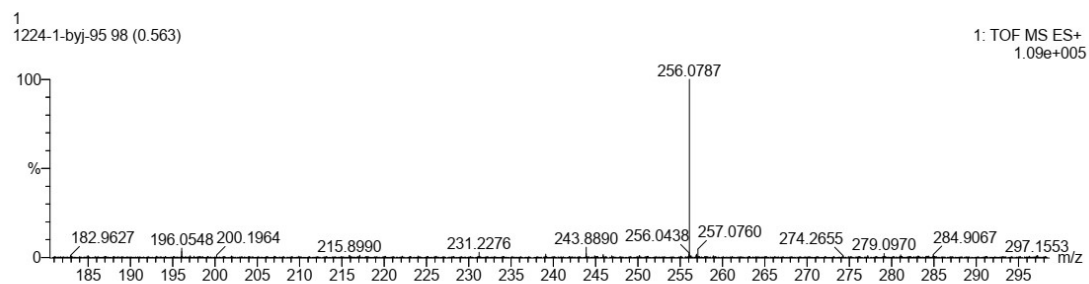

Minimum: -1.5  
Maximum: 50.0

| Mass     | Calc. Mass | mDa | PPM | DBE | i-FIT | Norm | Conf (%) | Formula                                                        |
|----------|------------|-----|-----|-----|-------|------|----------|----------------------------------------------------------------|
| 256.0787 | 256.0785   | 0.2 | 0.8 | 6.5 | 794.9 | n/a  | n/a      | C <sub>12</sub> H <sub>12</sub> N <sub>03</sub> F <sub>2</sub> |

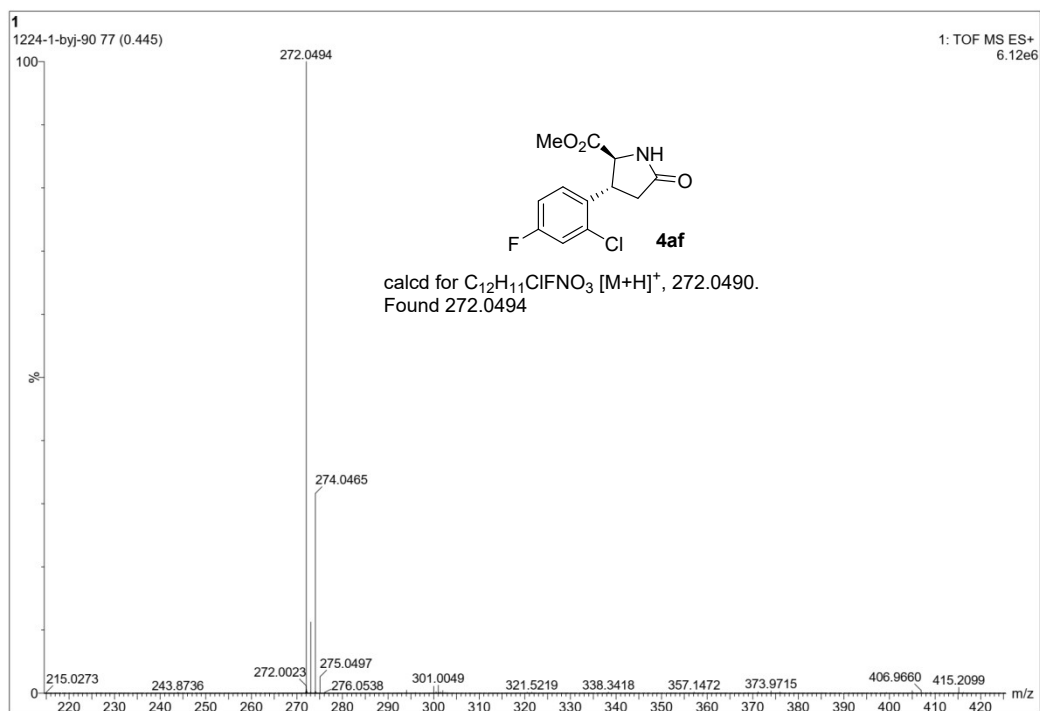

### Single Mass Analysis

Tolerance = 10.0 PPM / DBE: min = -1.5, max = 50.0

Element prediction: Off

Number of isotope peaks used for i-FIT = 3

Monoisotopic Mass, Even Electron Ions

4906 formula(e) evaluated with 1 results within limits (up to 50 best isotopic matches for each mass)

Elements Used:

C: 12-12 H: 0-13 N: 0-6 O: 0-20 F: 0-4 S: 0-4 Cl: 0-4 Mo: 0-1

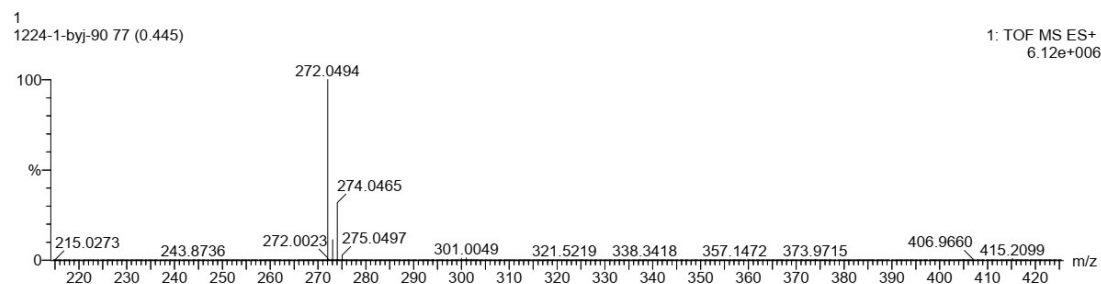

Minimum: -1.5  
Maximum: 5.0 10.0 50.0

| Mass     | Calc. Mass | mDa | PPM | DBE | i-FIT  | Norm | Conf (%) | Formula           |
|----------|------------|-----|-----|-----|--------|------|----------|-------------------|
| 272.0494 | 272.0490   | 0.4 | 1.5 | 6.5 | 1514.3 | n/a  | n/a      | C12 H12 N O3 F Cl |

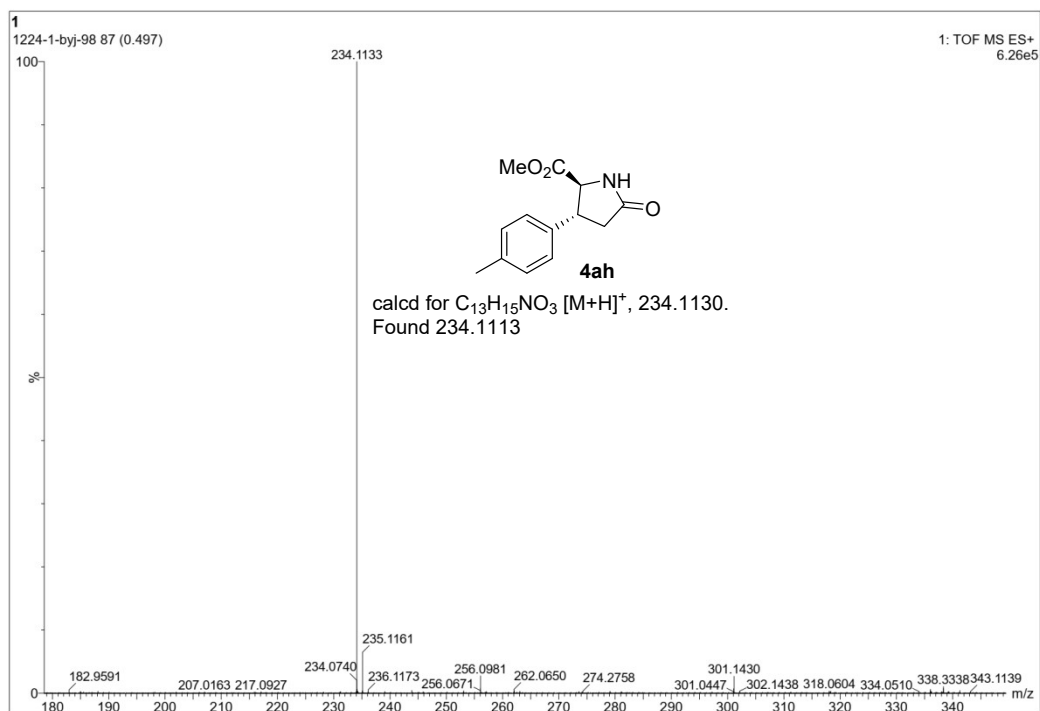

### Single Mass Analysis

Tolerance = 10.0 PPM / DBE: min = -1.5, max = 50.0  
 Element prediction: Off  
 Number of isotope peaks used for i-FIT = 3

Monoisotopic Mass, Even Electron Ions

85 formula(e) evaluated with 1 results within limits (up to 50 best isotopic matches for each mass)

Elements Used:

C: 13-13 H: 0-35 N: 0-6 O: 0-20

1224-1-byj-98 87 (0.497)

1: TOF MS ES+  
6.26e+005

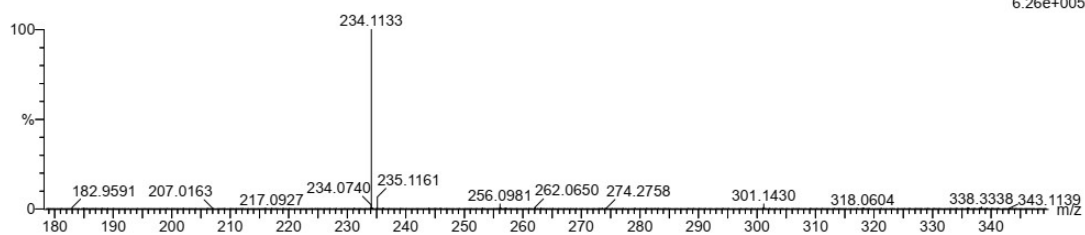

Minimum: -1.5  
 Maximum: 5.0 10.0 50.0

| Mass     | Calc. Mass | mDa | PPM | DBE | i-FIT | Norm | Conf(%) | Formula      |
|----------|------------|-----|-----|-----|-------|------|---------|--------------|
| 234.1133 | 234.1130   | 0.3 | 1.3 | 6.5 | 995.1 | n/a  | n/a     | C13 H16 N O3 |

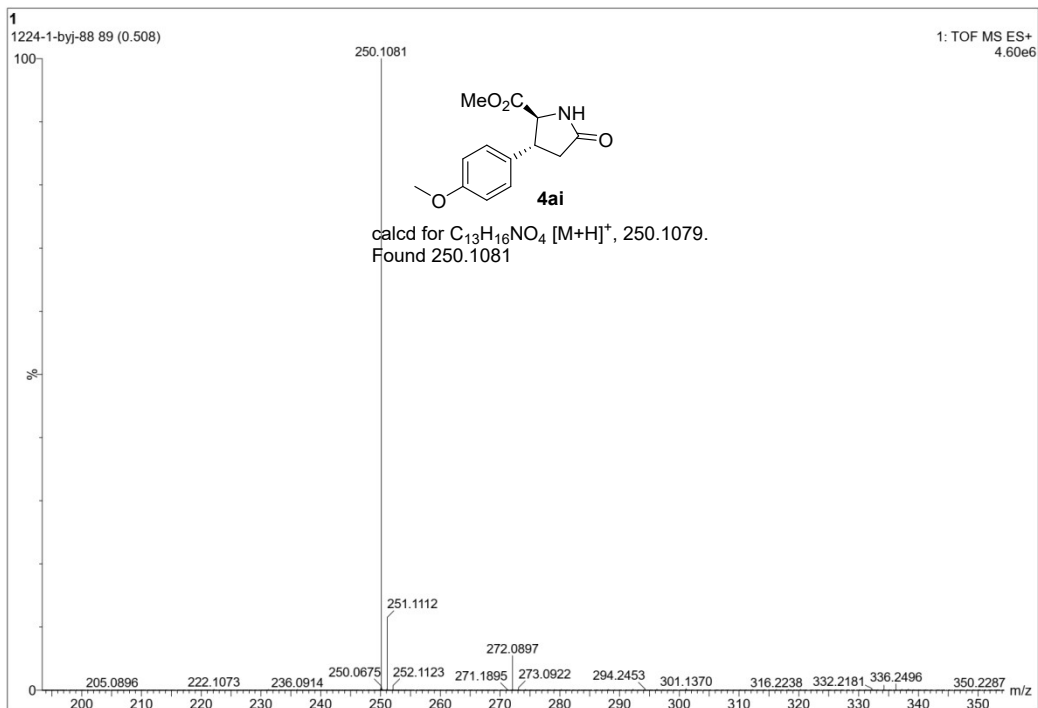

### Single Mass Analysis

Tolerance = 10.0 PPM / DBE: min = -1.5, max = 50.0

Element prediction: Off

Number of isotope peaks used for i-FIT = 3

Monoisotopic Mass, Even Electron Ions

3787 formula(e) evaluated with 1 results within limits (up to 50 best isotopic matches for each mass)

Elements Used:

C: 13-13 H: 0-30 N: 0-6 O: 0-20 F: 0-4 S: 0-4 Cl: 0-4 Mo: 0-1

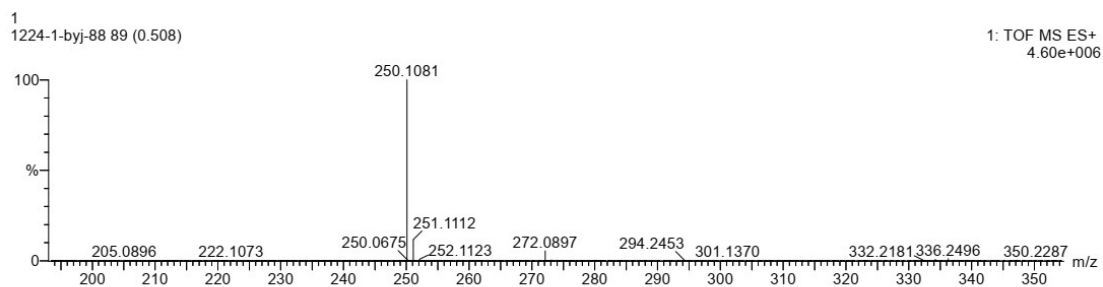

Minimum: -1.5

Maximum: 5.0 10.0 50.0

| Mass     | Calc. Mass | mDa | PPM | DBE | i-FIT  | Norm | Conf (%) | Formula      |
|----------|------------|-----|-----|-----|--------|------|----------|--------------|
| 250.1081 | 250.1079   | 0.2 | 0.8 | 6.5 | 1360.9 | n/a  | n/a      | C13 H16 N O4 |

## 7. HPLC copies

**rac-3aa:** ChiralPak AD-H, *n*-hex/*i*-PrOH = 98:2, 0.8 mL/min, 254 nm,  $t_R(\text{major}) = 26.127$  min and 41.873 min,  $t_R(\text{minor}) = 39.261$  and 54.615 min,  $dr = 99:1$ .

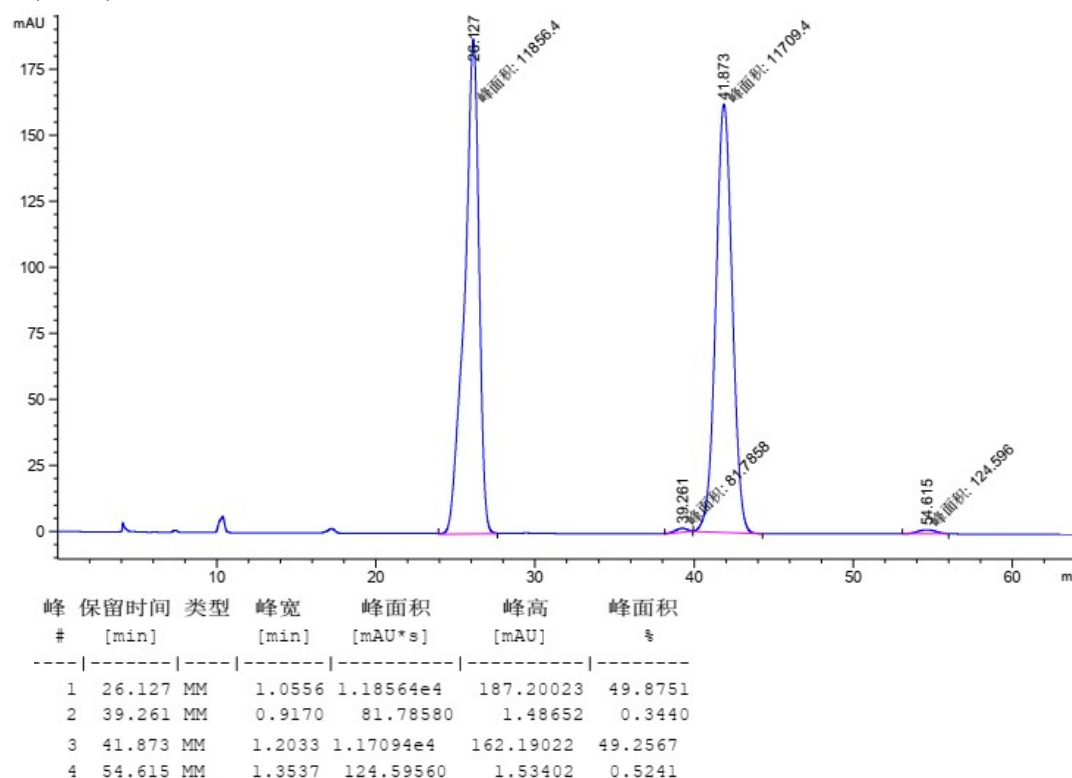

**enan-3aa:** ChiralPak AD-H, *n*-hex/*i*-PrOH = 98:2, 0.8 mL/min, 254 nm,  $t_R(\text{major}) = 26.818$  min,  $t_R(\text{minor}) = 43.017$  min, major: 97% *ee*.

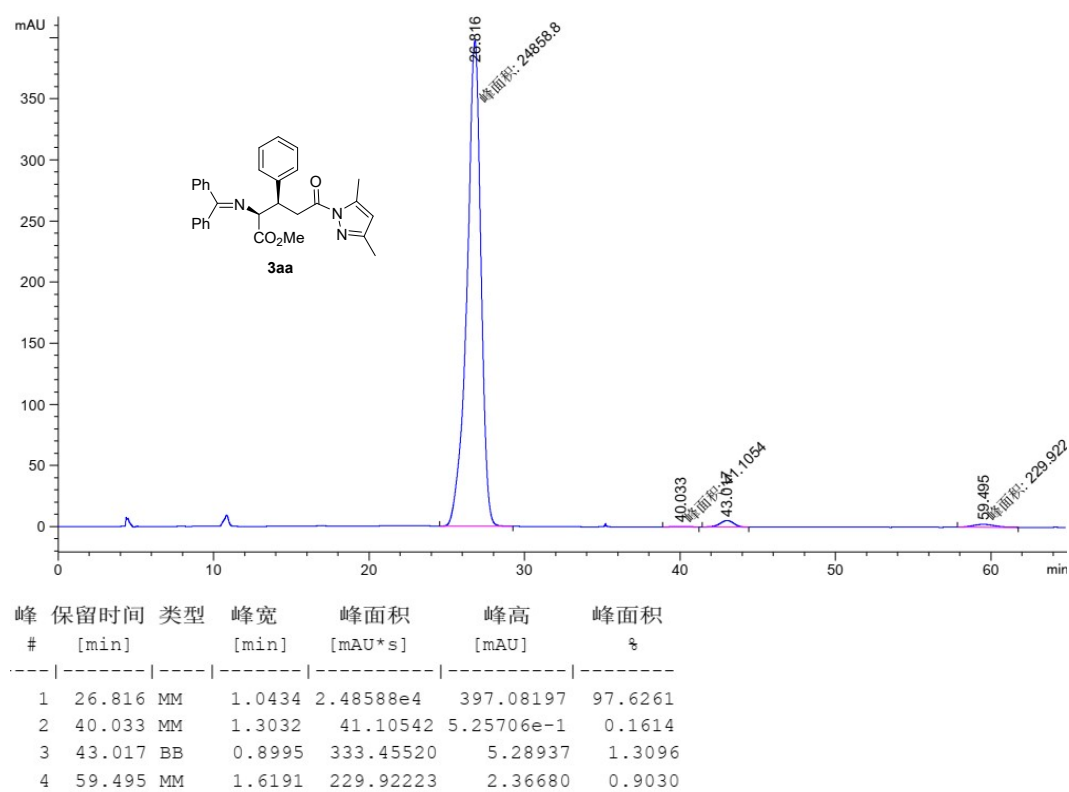



**rac-3ab:** ChiralPak AD-H, *n*-hex/*i*-PrOH = 90:10, 1.0 mL/min, 254 nm,  $t_R(\text{major}) = 7.638$  min and 12.999 min,  $t_R(\text{minor}) = 11.015$  and 15.591 min,  $dr = 95:5$ .

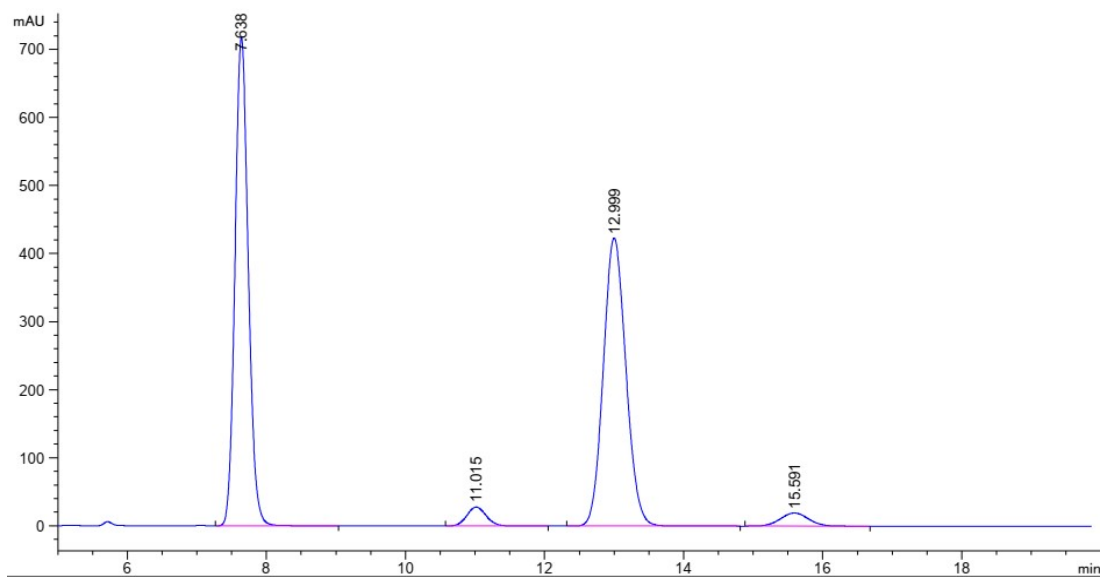

| 峰 # | 保留时间 [min] | 类型 | 峰宽 [min] | 峰面积 [mAU*s] | 峰高 [mAU]  | 峰面积 %   |
|-----|------------|----|----------|-------------|-----------|---------|
| 1   | 7.638      | VB | 0.2059   | 9527.01563  | 717.72510 | 47.2712 |
| 2   | 11.015     | BB | 0.3006   | 536.83368   | 27.75618  | 2.6637  |
| 3   | 12.999     | BB | 0.3512   | 9549.80469  | 423.23633 | 47.3843 |
| 4   | 15.591     | BB | 0.4373   | 540.29559   | 19.25997  | 2.6808  |

**enan-3ab:** ChiralPak AD-H, *n*-hex/*i*-PrOH = 90:10, 1.0 mL/min, 254 nm,  $t_R(\text{major}) = 7.707$  min,  $t_R(\text{minor}) = 12.670$  min, major: 97% *ee*.

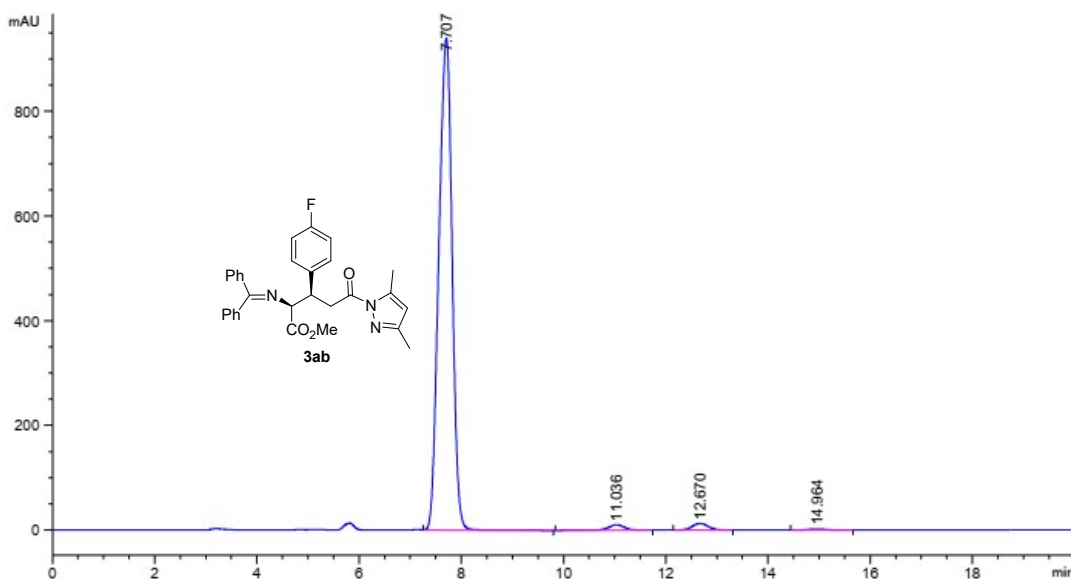

| 峰 # | 保留时间 [min] | 类型 | 峰宽 [min] | 峰面积 [mAU*s] | 峰高 [mAU]  | 峰面积 %   |
|-----|------------|----|----------|-------------|-----------|---------|
| 1   | 7.707      | VB | 0.2944   | 1.69529e4   | 939.89227 | 96.8160 |
| 2   | 11.036     | BB | 0.3382   | 231.98331   | 10.36213  | 1.3248  |
| 3   | 12.670     | BB | 0.3345   | 270.63654   | 12.60508  | 1.5456  |
| 4   | 14.964     | BB | 0.3883   | 54.91762    | 2.15510   | 0.3136  |

**rac-3ac:** ChiralPak AD-H, *n*-hex/*i*-PrOH = 90:10, 1.0 mL/min, 254 nm,  $t_R(\text{major}) = 7.785$  min and 12.934 min,  $t_R(\text{minor}) = 10.297$  and 15.205 min,  $dr = 98.5:1.5$ .

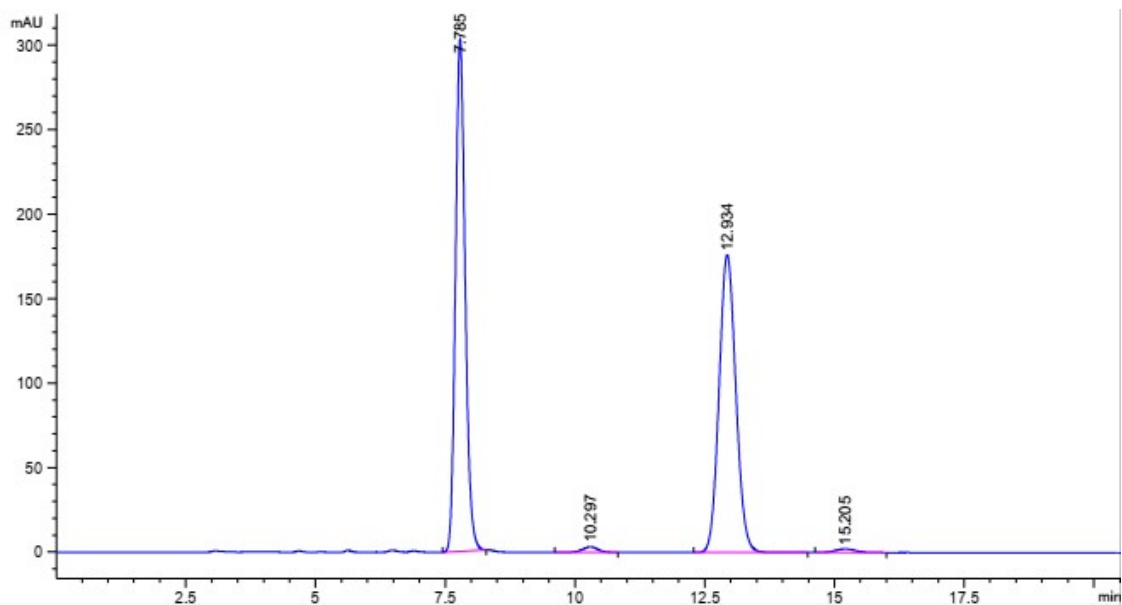

| 峰 # | 保留时间 [min] | 类型 | 峰宽 [min] | 峰面积 [mAU*s] | 峰高 [mAU]  | 峰面积 %   |
|-----|------------|----|----------|-------------|-----------|---------|
| 1   | 7.785      | BB | 0.2005   | 3935.17065  | 303.01117 | 49.0455 |
| 2   | 10.297     | BB | 0.3020   | 65.66937    | 3.28776   | 0.8185  |
| 3   | 12.934     | BB | 0.3496   | 3965.27393  | 176.18336 | 49.4207 |
| 4   | 15.205     | BB | 0.4087   | 57.39943    | 2.12798   | 0.7154  |

**enan-3ac:** ChiralPak AD-H, *n*-hex/*i*-PrOH = 90:10, 1.0 mL/min, 254 nm,  $t_R(\text{major}) = 8.049$  min,  $t_R(\text{minor}) = 13.203$  min, major: 97% *ee*.

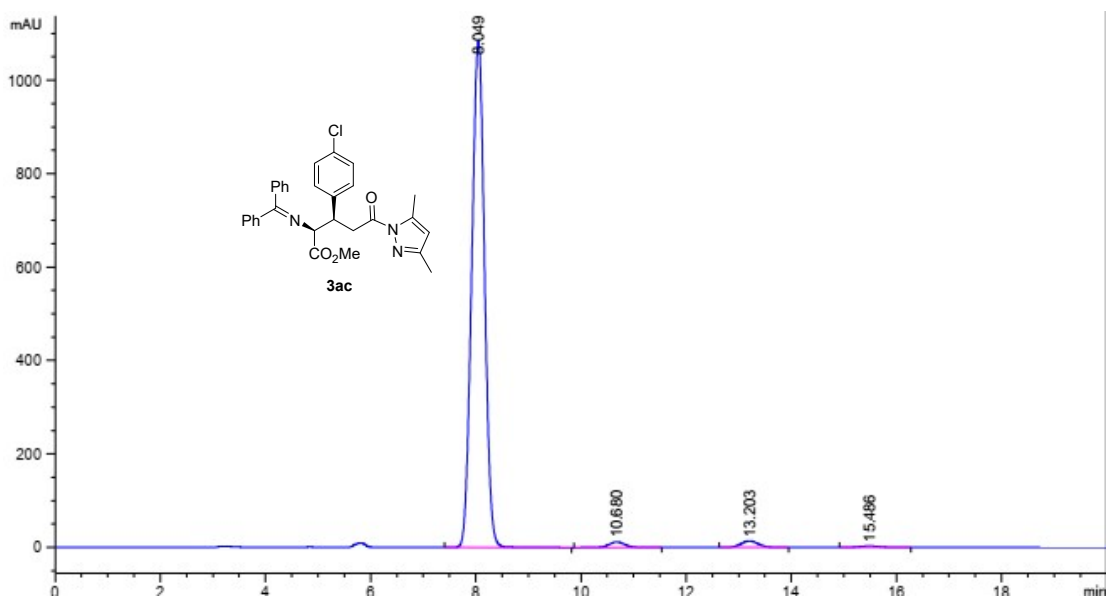

| 峰 # | 保留时间 [min] | 类型 | 峰宽 [min] | 峰面积 [mAU*s] | 峰高 [mAU]   | 峰面积 %   |
|-----|------------|----|----------|-------------|------------|---------|
| 1   | 8.049      | BB | 0.2656   | 1.83679e4   | 1084.32898 | 96.5541 |
| 2   | 10.680     | BB | 0.3250   | 259.30829   | 12.09974   | 1.3631  |
| 3   | 13.203     | BB | 0.3511   | 313.48825   | 13.90347   | 1.6479  |
| 4   | 15.486     | BB | 0.4096   | 82.73270    | 3.11795    | 0.4349  |

**rac-3ad**: ChiralPak AD-H, *n*-hex/*i*-PrOH = 90:10, 1.0 mL/min, 254 nm,  $t_R(\text{major}) = 6.827$  and  $12.278$  min,  $t_R(\text{minor}) = 7.319$  and  $14.022$  min, *dr* > 96:4.

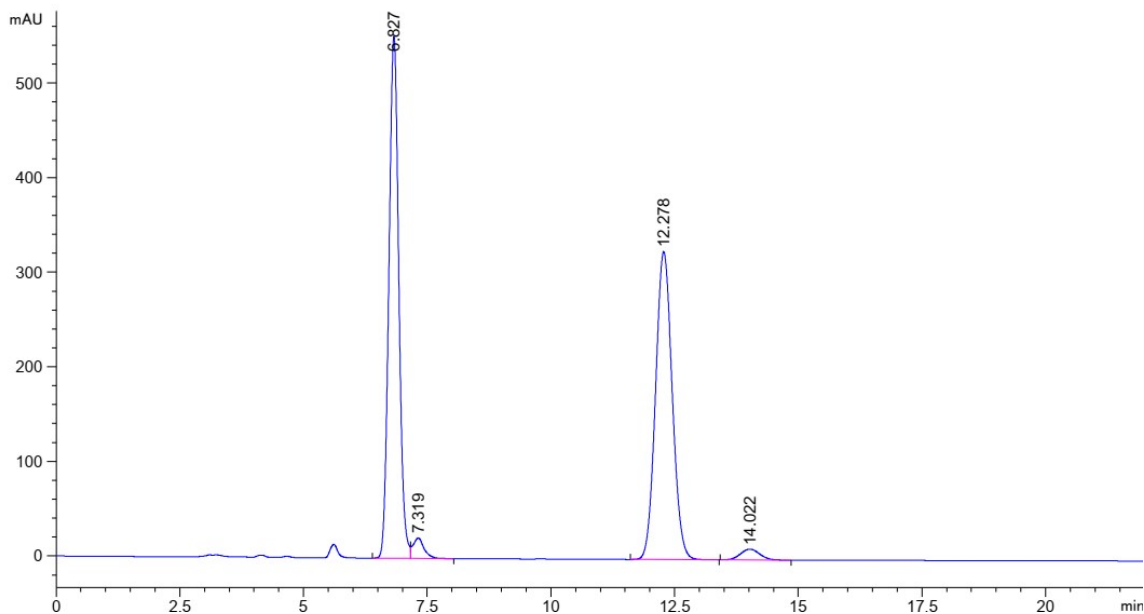

| 峰 # | 保留时间 [min] | 类型 | 峰宽 [min] | 峰面积 [mAU*s] | 峰高 [mAU]  | 峰面积 %   |
|-----|------------|----|----------|-------------|-----------|---------|
| 1   | 6.827      | BV | 0.2151   | 7656.04248  | 551.07117 | 48.0594 |
| 2   | 7.319      | VB | 0.2246   | 332.68820   | 21.49391  | 2.0884  |
| 3   | 12.278     | BB | 0.3657   | 7634.63428  | 325.41895 | 47.9250 |
| 4   | 14.022     | BB | 0.4148   | 307.02325   | 11.45067  | 1.9273  |

**enan-3ad**: ChiralPak AD-H, *n*-hex/*i*-PrOH = 90:10, 1.0 mL/min, 254 nm,  $t_R(\text{major}) = 7.108$  min,  $t_R(\text{minor}) = 13.529$  min, 97% *ee*.

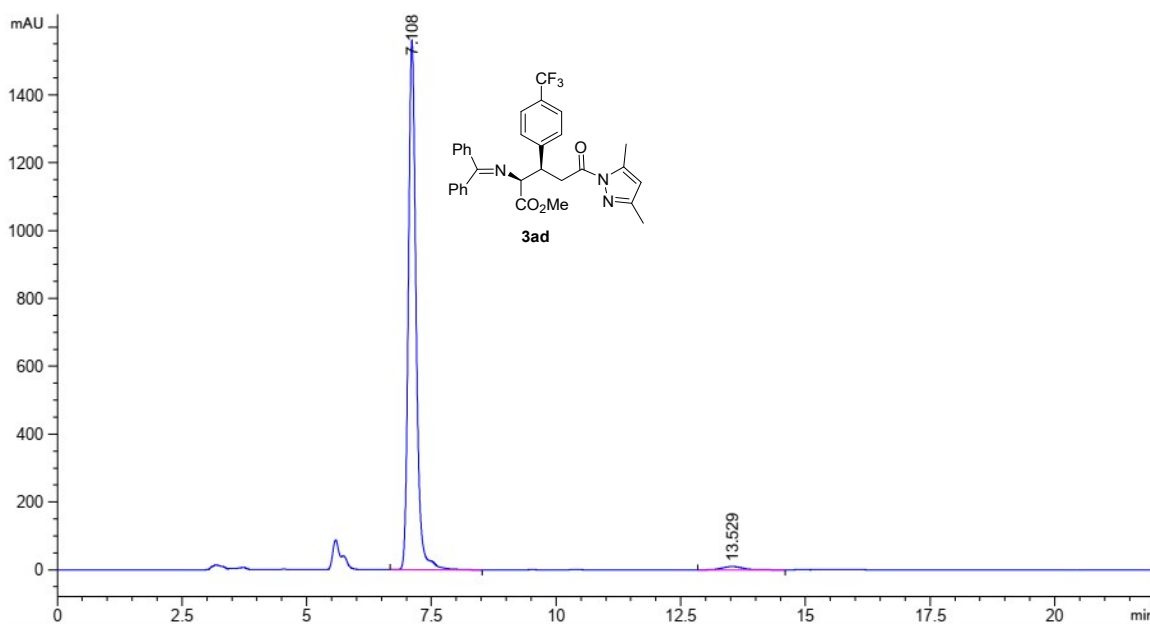

| 峰 # | 保留时间 [min] | 类型 | 峰宽 [min] | 峰面积 [mAU*s] | 峰高 [mAU]   | 峰面积 %   |
|-----|------------|----|----------|-------------|------------|---------|
| 1   | 7.108      | BB | 0.1633   | 1.67545e4   | 1560.49609 | 98.3840 |
| 2   | 13.529     | BB | 0.4381   | 275.20343   | 9.69721    | 1.6160  |

**rac-3ae**: ChiralPak AD-H, *n*-hex/*i*-PrOH = 90:10, 1.0 mL/min, 254 nm,  $t_R(\text{major}) = 6.903$  and 11.988min,  $t_R(\text{minor}) = 8.617$  and 14.269 min,  $dr = 98:2$ .

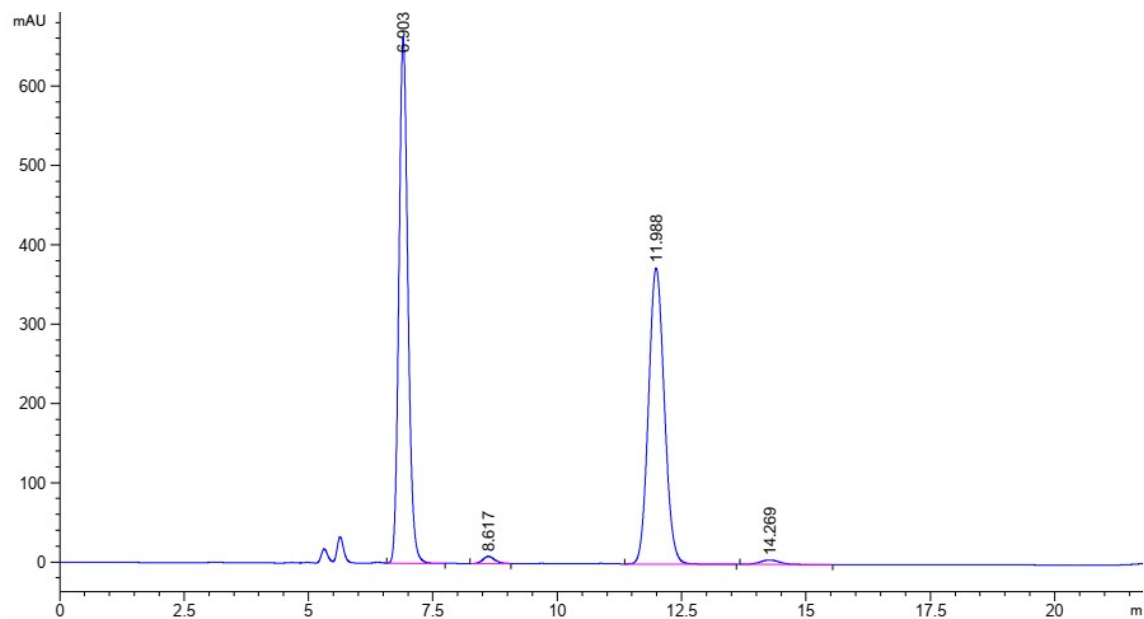

| 峰 # | 保留时间 [min] | 类型 | 峰宽 [min] | 峰面积 [mAU*s] | 峰高 [mAU]  | 峰面积 %   |
|-----|------------|----|----------|-------------|-----------|---------|
| 1   | 6.903      | VV | 0.1931   | 8350.28223  | 662.37164 | 49.4786 |
| 2   | 8.617      | BB | 0.2558   | 150.94916   | 9.03841   | 0.8944  |
| 3   | 11.988     | BB | 0.3422   | 8225.60645  | 373.16745 | 48.7398 |
| 4   | 14.269     | BB | 0.4179   | 149.71959   | 5.54634   | 0.8871  |

**enan-3ae**: ChiralPak AD-H, *n*-hex/*i*-PrOH = 95:5, 1.0 mL/min, 254 nm,  $t_R(\text{major}) = 7.005$  min,  $t_R(\text{minor}) = 12.474$  min, 97% *ee*.

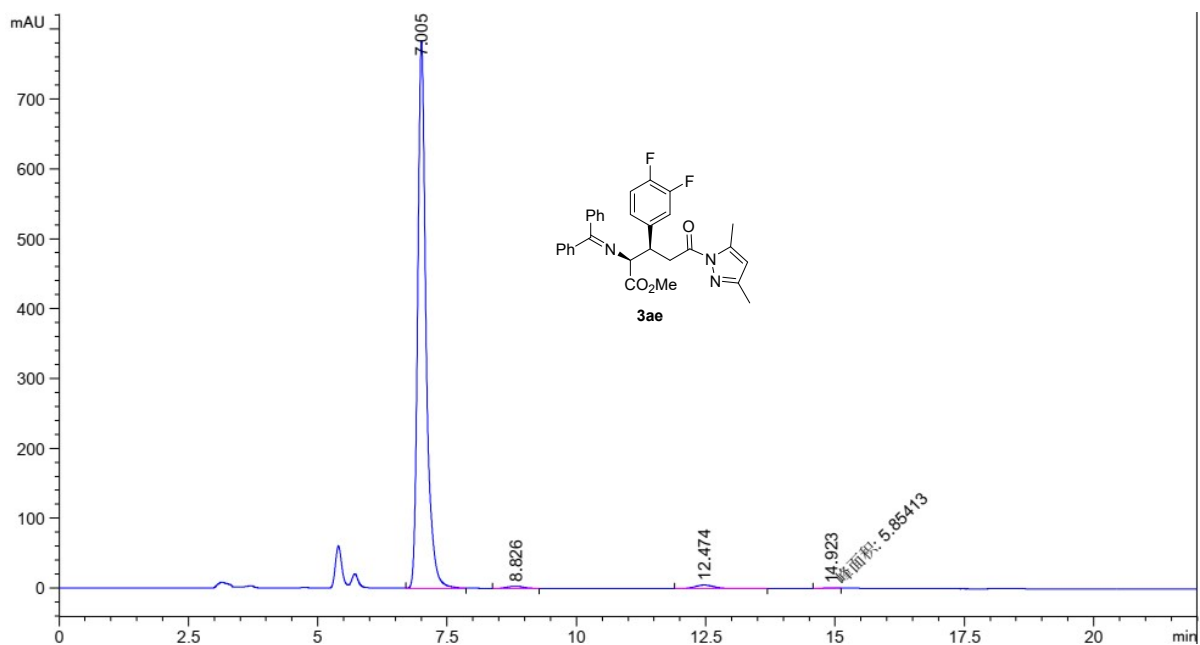

| 峰 # | 保留时间 [min] | 类型 | 峰宽 [min] | 峰面积 [mAU*s] | 峰高 [mAU]   | 峰面积 %   |
|-----|------------|----|----------|-------------|------------|---------|
| 1   | 7.005      | VV | 0.1693   | 8817.55859  | 783.45496  | 97.7886 |
| 2   | 8.826      | BB | 0.3276   | 66.03829    | 3.18937    | 0.7324  |
| 3   | 12.474     | BB | 0.3860   | 127.50979   | 5.13047    | 1.4141  |
| 4   | 14.923     | MM | 0.3086   | 5.85413     | 3.16154e-1 | 0.0649  |

*rac*-**3af**: ChiralPak AD-H, *n*-hex/*i*-PrOH = 98:2, 0.4 mL/min, 254 nm,  $t_R$  = 53.703 and 57.917 min, *dr* > 99:1.

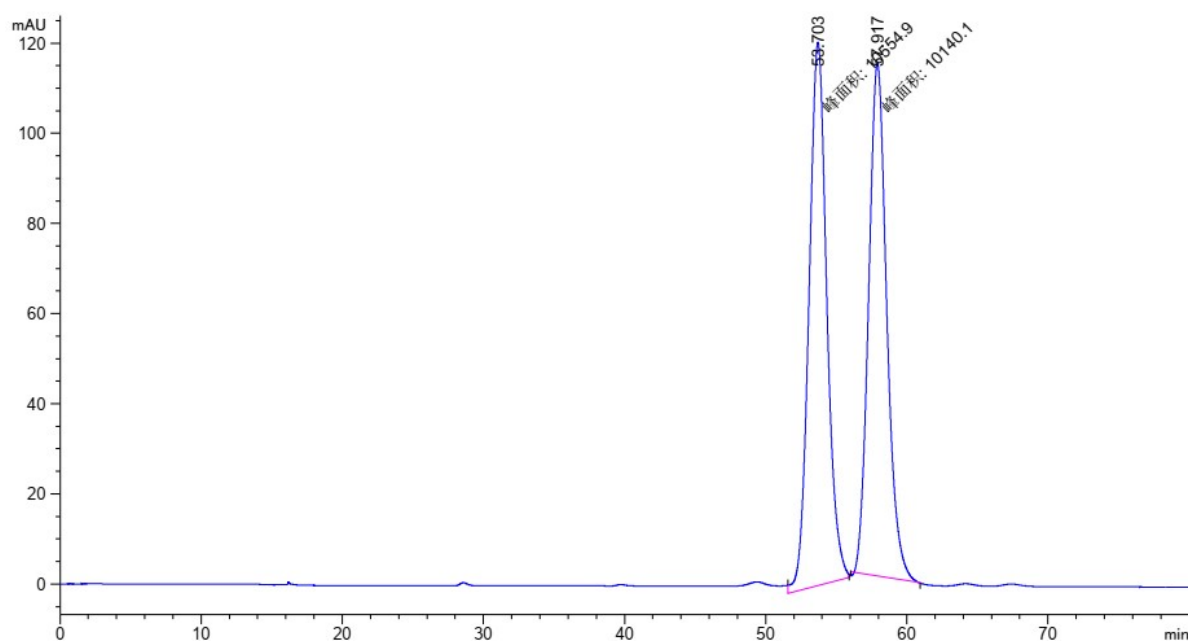

| 峰 # | 保留时间 [min] | 类型 | 峰宽 [min] | 峰面积 [mAU*s] | 峰高 [mAU]  | 峰面积 %   |
|-----|------------|----|----------|-------------|-----------|---------|
| 1   | 53.703     | MM | 1.4605   | 1.05549e4   | 120.45188 | 51.0023 |
| 2   | 57.917     | MM | 1.4863   | 1.01401e4   | 113.70750 | 48.9977 |

*enan*-**3af**: ChiralPak AD-H, *n*-hex/*i*-PrOH = 98:2, 0.4 mL/min, 254 nm,  $t_R$ (major) = 66.839 min,  $t_R$ (minor) = 71.248 min, 99% *ee*.

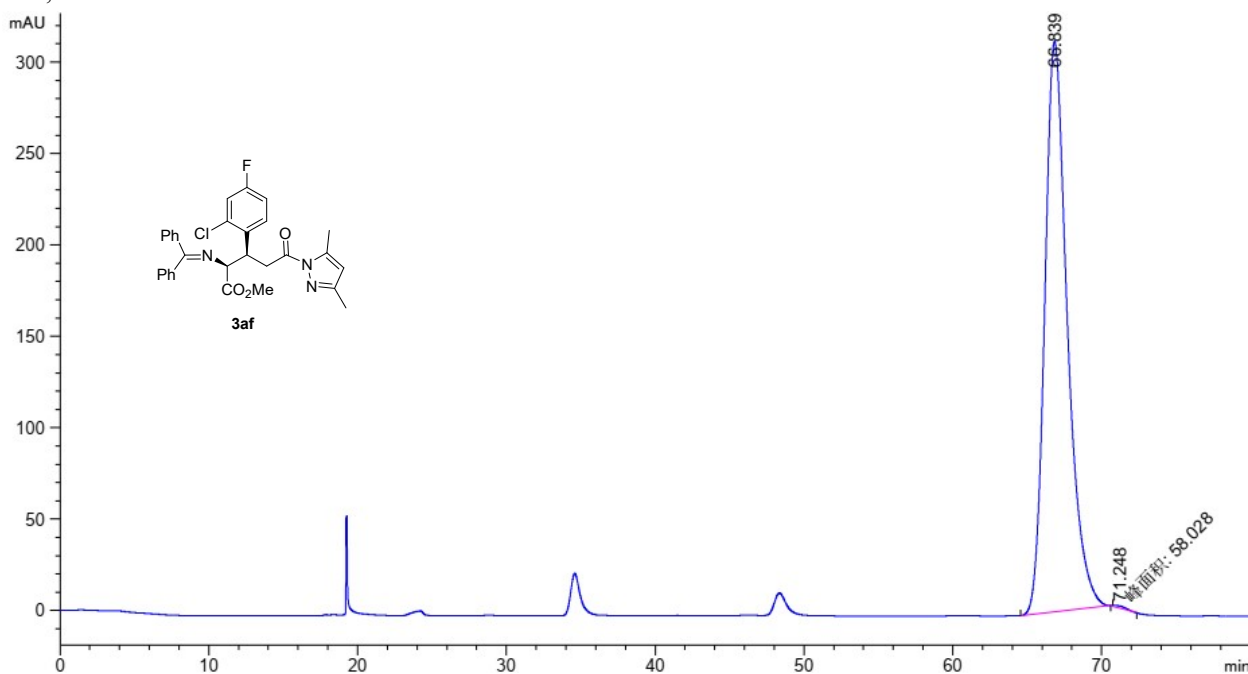

| 峰 # | 保留时间 [min] | 类型 | 峰宽 [min] | 峰面积 [mAU*s] | 峰高 [mAU]  | 峰面积 %   |
|-----|------------|----|----------|-------------|-----------|---------|
| 1   | 66.839     | BB | 1.5511   | 3.28929e4   | 311.96848 | 99.8239 |
| 2   | 71.248     | MM | 0.8275   | 58.02803    | 1.16868   | 0.1761  |

**rac-3ag:** ChiralPak AD-H, *n*-hex/*i*-PrOH = 90:10, 1.0 mL/min, 254 nm,  $t_R(\text{major}) = 13.846$  and  $10.425$ ,  $t_R(\text{minor}) = 9.653$  and  $12.909$  min,  $dr = 98:2$ .

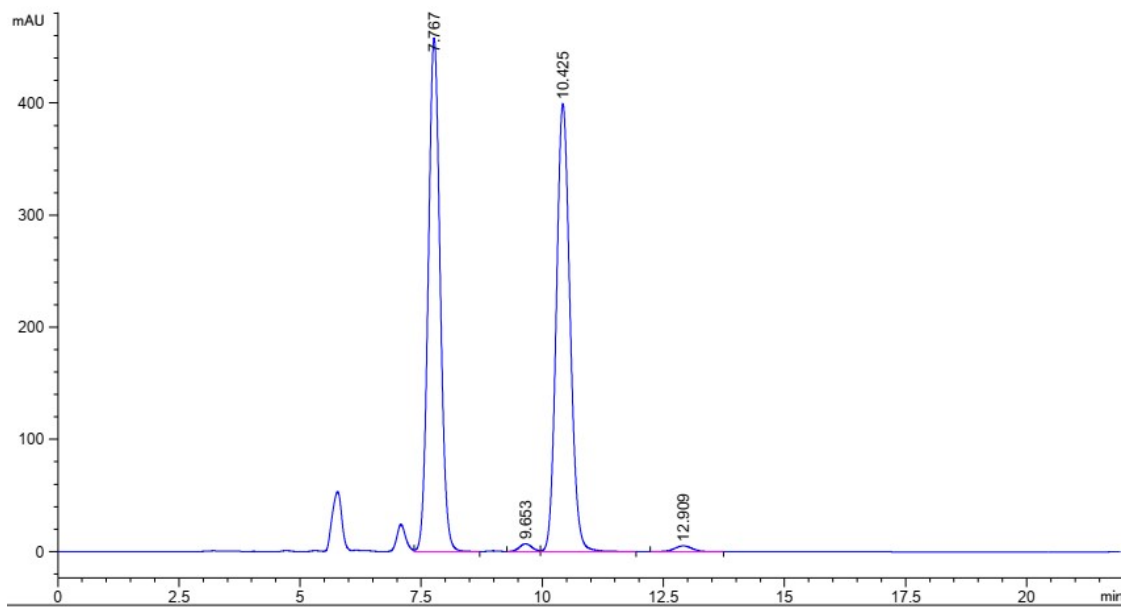

| 峰 # | 保留时间 [min] | 类型 | 峰宽 [min] | 峰面积 [mAU*s] | 峰高 [mAU]  | 峰面积 %   |
|-----|------------|----|----------|-------------|-----------|---------|
| 1   | 7.767      | VB | 0.2629   | 7772.61768  | 458.28308 | 49.0636 |
| 2   | 9.653      | BV | 0.2812   | 121.83543   | 6.79345   | 0.7691  |
| 3   | 10.425     | VB | 0.3046   | 7822.30908  | 399.17081 | 49.3773 |
| 4   | 12.909     | BB | 0.3841   | 125.15193   | 5.06734   | 0.7900  |

**enan-3ag:** ChiralPak AD-H, *n*-hex/*i*-PrOH = 90:10, 1.0 mL/min, 254 nm,  $t_R(\text{major}) = 7.834$  min,  $t_R(\text{minor}) = 10.536$  min, 98% *ee*.

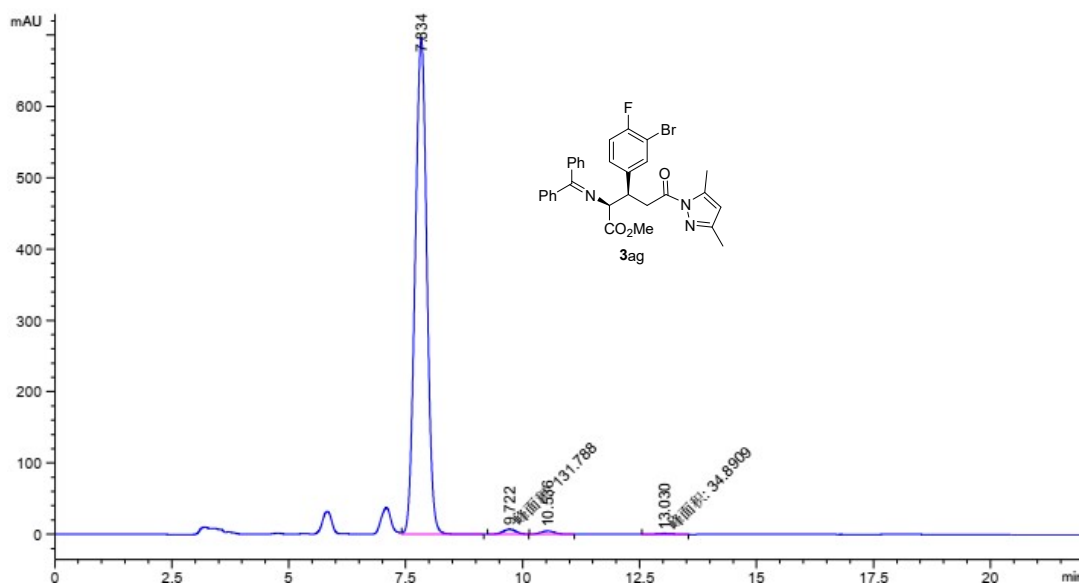

| 峰 # | 保留时间 [min] | 类型 | 峰宽 [min] | 峰面积 [mAU*s] | 峰高 [mAU]  | 峰面积 %   |
|-----|------------|----|----------|-------------|-----------|---------|
| 1   | 7.834      | VB | 0.2730   | 1.20362e4   | 695.09381 | 97.9154 |
| 2   | 9.722      | MM | 0.3147   | 131.78838   | 6.97891   | 1.0721  |
| 3   | 10.536     | BB | 0.3077   | 89.57288    | 4.53022   | 0.7287  |
| 4   | 13.030     | MM | 0.4214   | 34.89092    | 1.38004   | 0.2838  |

**rac-3ah**: ChiralPak AD-H, *n*-hex/*i*-PrOH = 90:10, 1.0 mL/min, 254 nm,  $t_R = 7.875$  and 10.420 min, *dr* > 99:1.

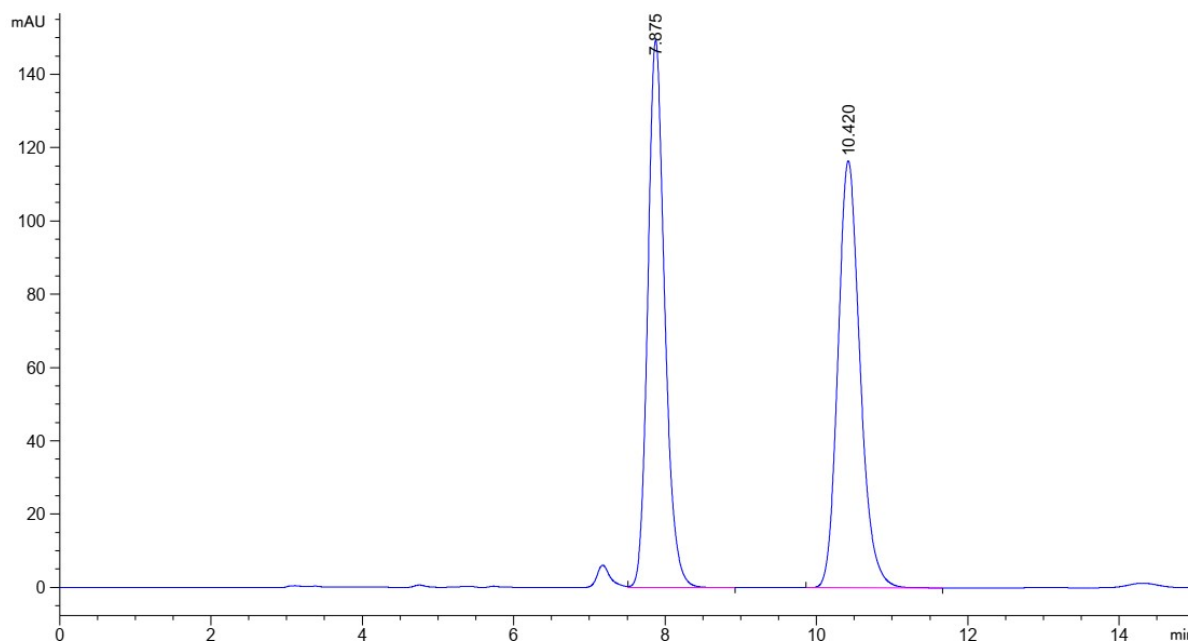

| 峰 # | 保留时间 [min] | 类型 | 峰宽 [min] | 峰面积 [mAU*s] | 峰高 [mAU]  | 峰面积 %   |
|-----|------------|----|----------|-------------|-----------|---------|
| 1   | 7.875      | VB | 0.2376   | 2325.64990  | 149.38385 | 49.6346 |
| 2   | 10.420     | BB | 0.3114   | 2359.89624  | 116.47906 | 50.3654 |

**enan-3ah**: ChiralPak AD-H, *n*-hex/*i*-PrOH = 90:10, 1.0 mL/min, 254 nm,  $t_R(\text{major}) = 7.856$  min,  $t_R(\text{minor}) = 10.332$  min, 94% *ee*.

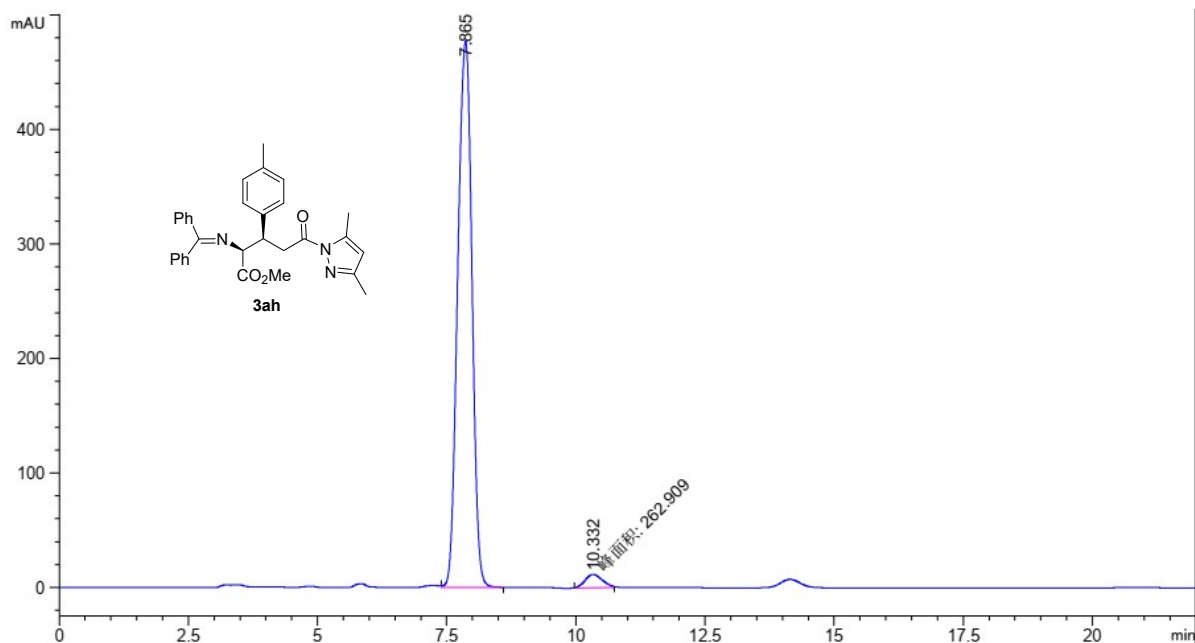

| 峰 # | 保留时间 [min] | 类型 | 峰宽 [min] | 峰面积 [mAU*s] | 峰高 [mAU]  | 峰面积 %   |
|-----|------------|----|----------|-------------|-----------|---------|
| 1   | 7.865      | VB | 0.3092   | 9083.50684  | 476.97144 | 97.1871 |
| 2   | 10.332     | MM | 0.3797   | 262.90906   | 11.53943  | 2.8129  |

**rac-3ai:** ChiralPak AD-H, *n*-hex/*i*-PrOH = 90:10, 1.0 mL/min, 254 nm,  $t_R(\text{major}) = 11.827$  and 19.675 min,  $t_R(\text{minor}) = 14.268$  and 18.145 min,  $dr = 93:7$ .

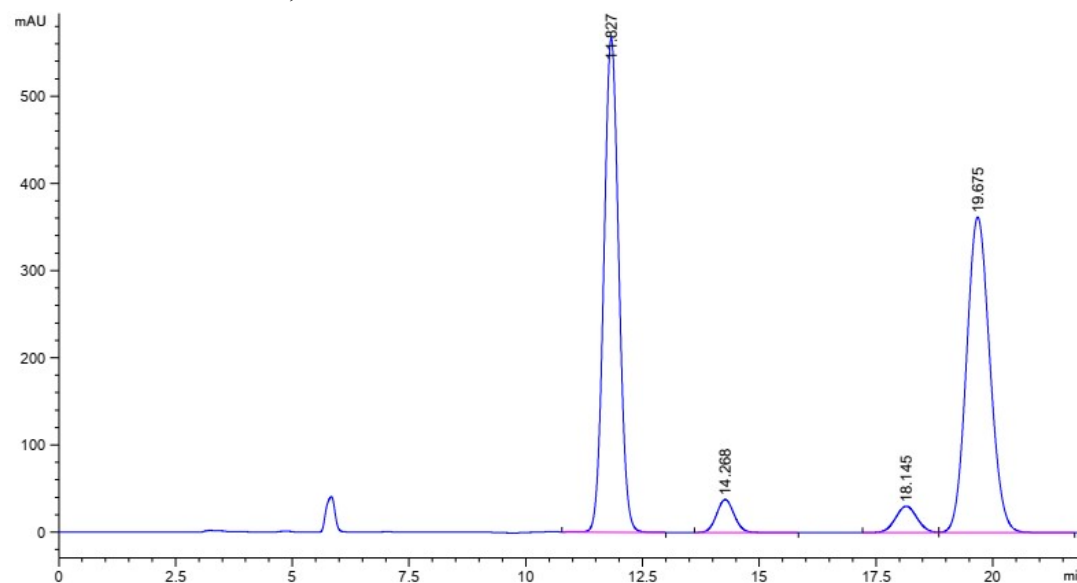

| 峰 # | 保留时间 [min] | 类型 | 峰宽 [min] | 峰面积 [mAU*s] | 峰高 [mAU]  | 峰面积 %   |
|-----|------------|----|----------|-------------|-----------|---------|
| 1   | 11.827     | BB | 0.3442   | 1.25440e4   | 566.82074 | 46.3462 |
| 2   | 14.268     | BB | 0.4035   | 978.35217   | 37.73576  | 3.6147  |
| 3   | 18.145     | BV | 0.4990   | 966.85895   | 30.23919  | 3.5723  |
| 4   | 19.675     | VB | 0.5425   | 1.25766e4   | 361.85284 | 46.4668 |

**enan-3ai:** ChiralPak AD-H, *n*-hex/*i*-PrOH = 90:10, 1.0 mL/min, 254 nm,  $t_R(\text{major}) = 11.882$  and 19.703 min,  $t_R(\text{minor}) = 14.327$  and 18.148 min,  $dr = 98:2$ , 95 % *ee*.

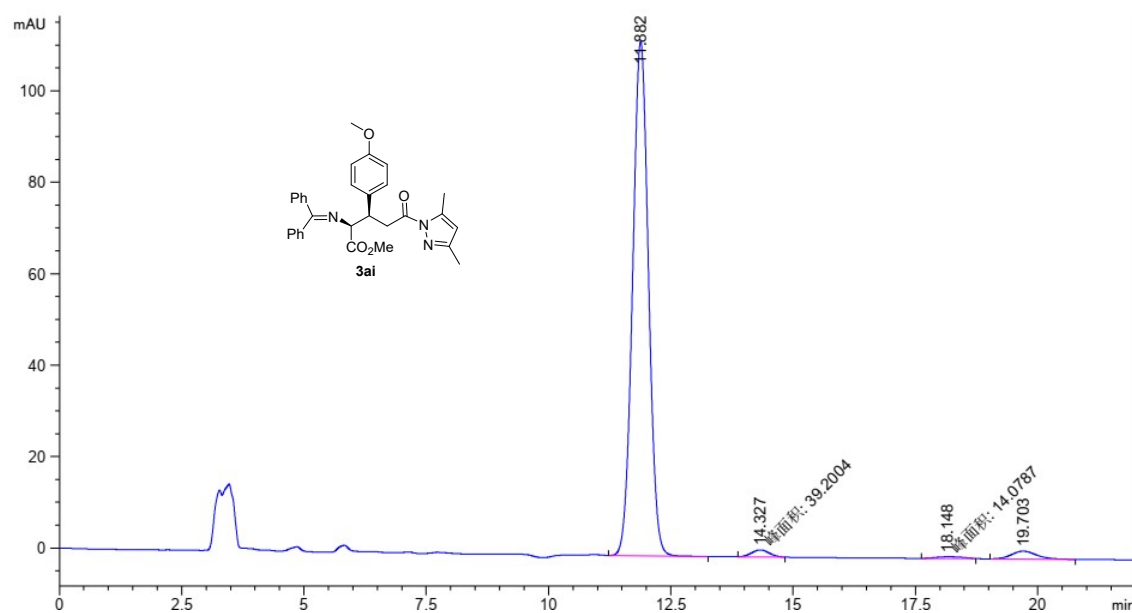

| 峰 # | 保留时间 [min] | 类型 | 峰宽 [min] | 峰面积 [mAU*s] | 峰高 [mAU]   | 峰面积 %   |
|-----|------------|----|----------|-------------|------------|---------|
| 1   | 11.882     | BB | 0.3477   | 2523.27271  | 112.49429  | 95.6486 |
| 2   | 14.327     | MM | 0.4224   | 39.20037    | 1.54669    | 1.4860  |
| 3   | 18.148     | MM | 0.6175   | 14.07875    | 3.79983e-1 | 0.5337  |
| 4   | 19.703     | BB | 0.5311   | 61.51308    | 1.72900    | 2.3317  |



**rac-3aj**: ChiralPak AD-H, *n*-hex/*i*-PrOH = 90:10, 1.0 mL/min, 254 nm,  $t_R(\text{major}) = 9.019$  and  $16.287$  min,  $t_R(\text{minor}) = 8.092$  and  $10.101$  min,  $dr = 98.5:1.5$ .

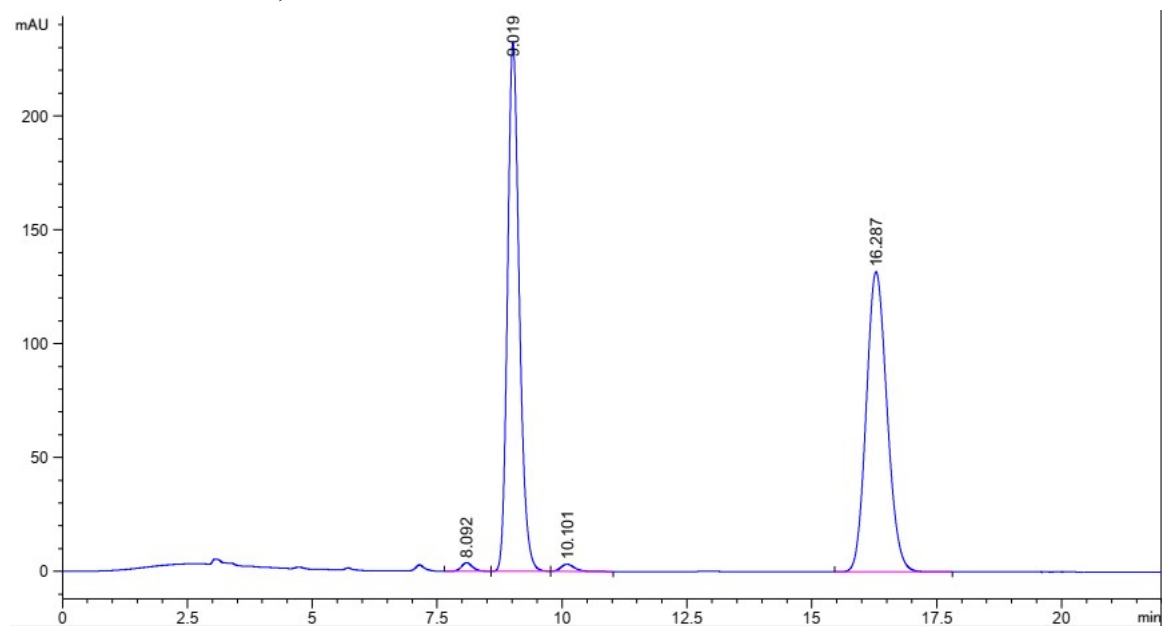

| 峰 # | 保留时间 [min] | 类型 | 峰宽 [min] | 峰面积 [mAU*s] | 峰高 [mAU]  | 峰面积 %   |
|-----|------------|----|----------|-------------|-----------|---------|
| 1   | 8.092      | BB | 0.2348   | 57.07224    | 3.72327   | 0.7408  |
| 2   | 9.019      | BB | 0.2492   | 3787.35156  | 232.29094 | 49.1604 |
| 3   | 10.101     | BB | 0.2906   | 59.76531    | 3.13235   | 0.7758  |
| 4   | 16.287     | BB | 0.4482   | 3799.88354  | 131.87317 | 49.3230 |

**enan-3aj**: ChiralPak AD-H, *n*-hex/*i*-PrOH = 90:10, 1.0 mL/min, 254 nm,  $t_R(\text{major}) = 9.163$  and  $16.063$  min, 95.5 % *ee*.

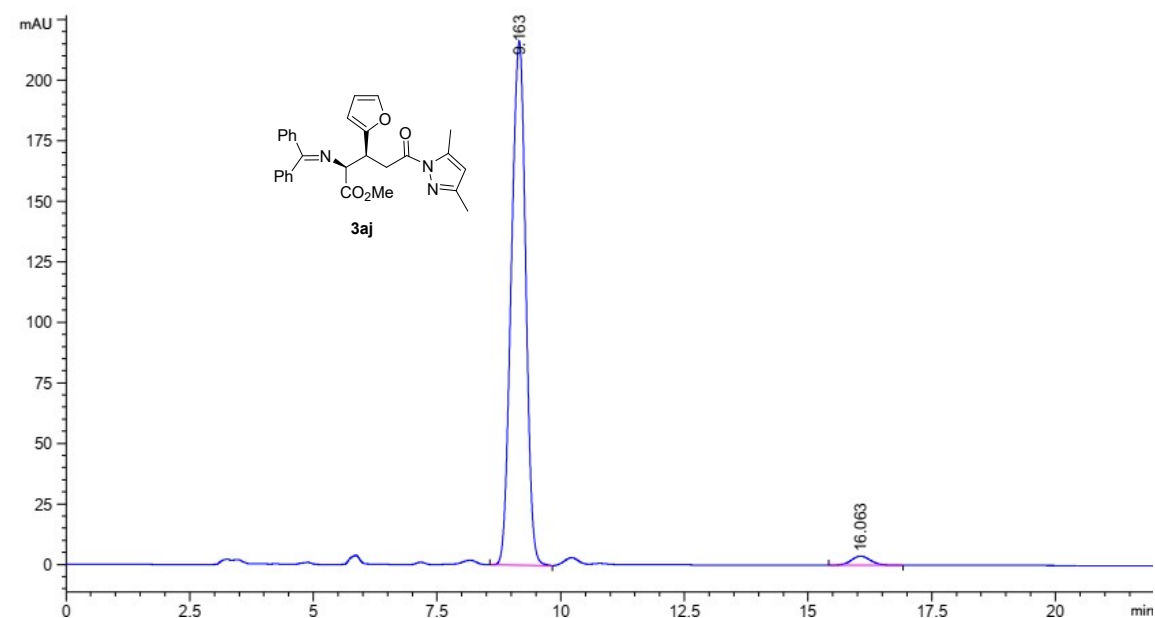

| 峰 # | 保留时间 [min] | 类型 | 峰宽 [min] | 峰面积 [mAU*s] | 峰高 [mAU]  | 峰面积 %   |
|-----|------------|----|----------|-------------|-----------|---------|
| 1   | 9.163      | BB | 0.3238   | 4354.79150  | 216.39275 | 97.7529 |
| 2   | 16.063     | BB | 0.4147   | 100.10626   | 3.73461   | 2.2471  |

**rac-3ak**: ChiralPak AD-H, *n*-hex/*i*-PrOH = 90:10, 1.0 mL/min, 254 nm,  $t_R(\text{major}) = 7.804$  and  $11.835$  min,  $dr > 99:1$ .

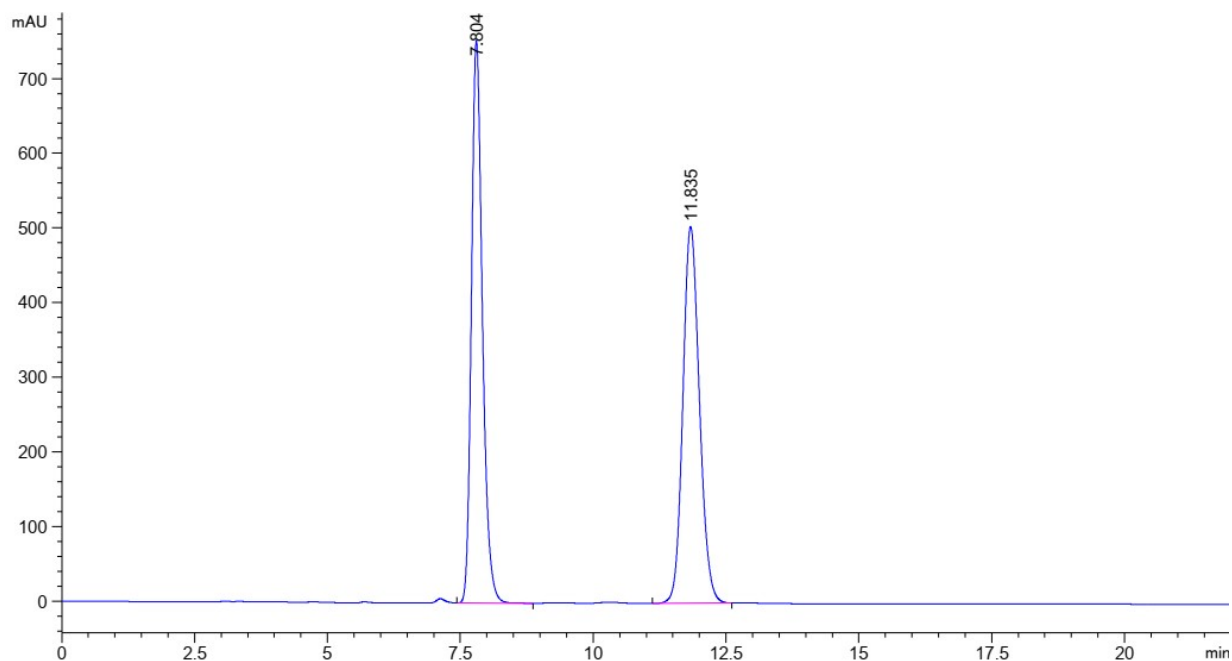

| 峰 # | 保留时间 [min] | 类型 | 峰宽 [min] | 峰面积 [mAU*s] | 峰高 [mAU]  | 峰面积 %   |
|-----|------------|----|----------|-------------|-----------|---------|
| 1   | 7.804      | VB | 0.2190   | 1.07834e4   | 753.34802 | 49.7393 |
| 2   | 11.835     | BB | 0.3340   | 1.08965e4   | 504.50000 | 50.2607 |

**enan-3ak**: ChiralPak AD-H, *n*-hex/*i*-PrOH = 90:10, 1.0 mL/min, 254 nm,  $t_R(\text{major}) = 7.937$  min,  $t_R(\text{minor}) = 11.742$  min, 95 % *ee*.

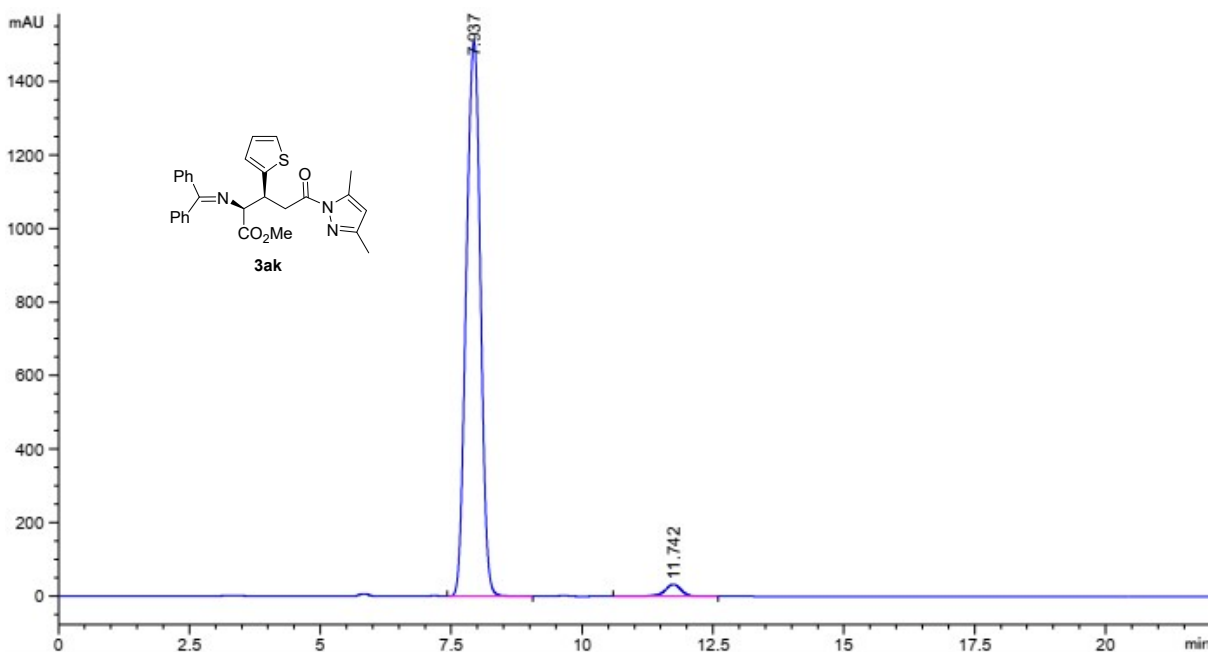

| 峰 # | 保留时间 [min] | 类型 | 峰宽 [min] | 峰面积 [mAU*s] | 峰高 [mAU]   | 峰面积 %   |
|-----|------------|----|----------|-------------|------------|---------|
| 1   | 7.937      | VB | 0.3042   | 2.83547e4   | 1509.06909 | 97.5321 |
| 2   | 11.742     | BB | 0.3309   | 717.47205   | 32.83446   | 2.4679  |

S98

*rac*-**3ba**: ChiralPak AD-H, *n*-hex/*i*-PrOH = 97:3, 0.7 mL/min, 254 nm,  $t_R$  = 28.289 and 39.118 min, dr > 99:1.

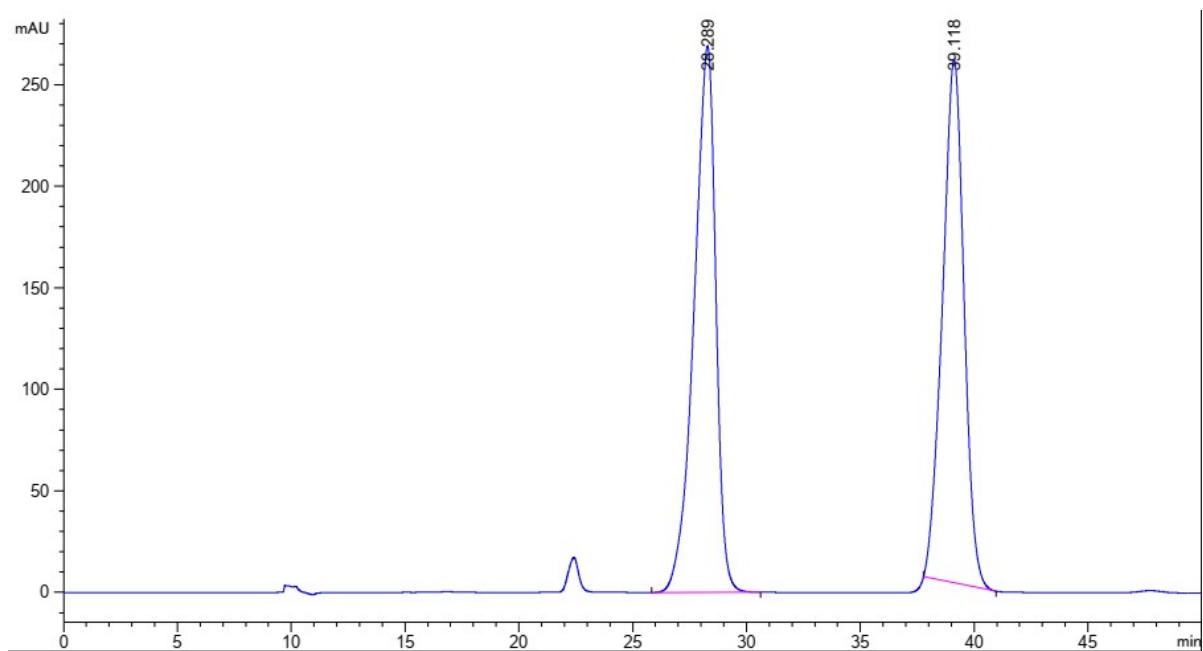

| 峰 # | 保留时间 [min] | 类型 | 峰宽 [min] | 峰面积 [mAU*s] | 峰高 [mAU]  | 峰面积 %   |
|-----|------------|----|----------|-------------|-----------|---------|
| 1   | 28.289     | BB | 1.0338   | 1.78887e4   | 269.01865 | 51.4181 |
| 2   | 39.118     | BB | 0.9619   | 1.69020e4   | 257.46701 | 48.5819 |

*enan*-**3ba**: ChiralPak AD-H, *n*-hex/*i*-PrOH = 97:3, 0.7 mL/min, 254 nm,  $t_R$ (major) = 28.096 min,  $t_R$ (minor) = 38.664 min, 98 % *ee*.

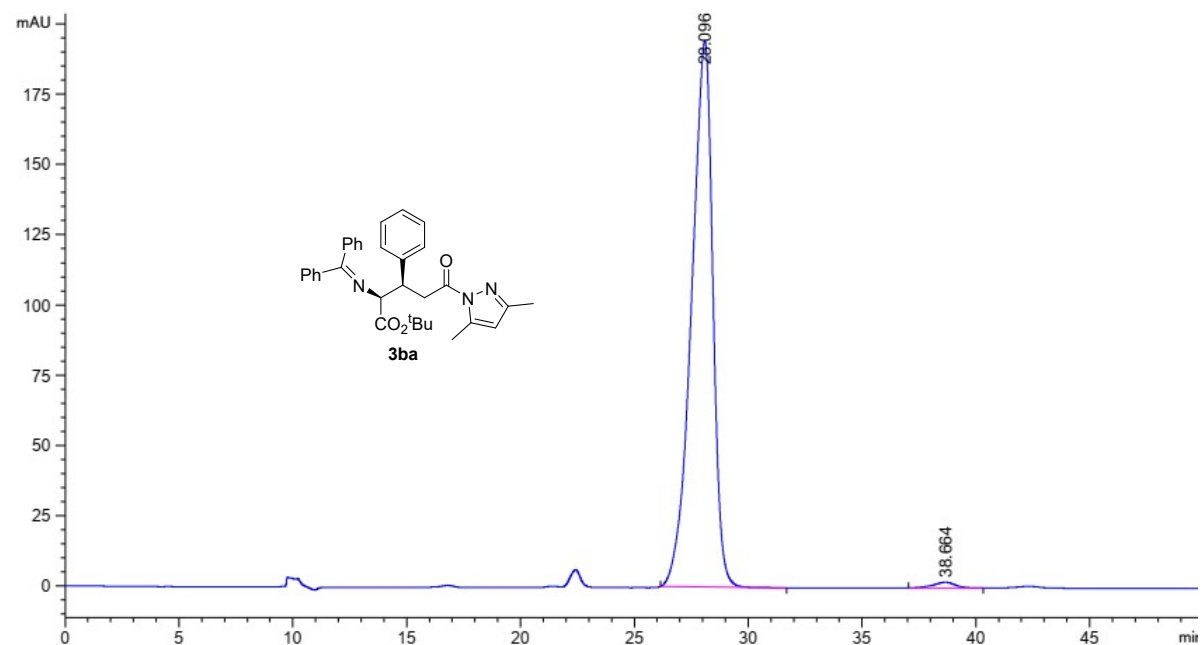

| 峰 # | 保留时间 [min] | 类型 | 峰宽 [min] | 峰面积 [mAU*s] | 峰高 [mAU]  | 峰面积 %   |
|-----|------------|----|----------|-------------|-----------|---------|
| 1   | 28.096     | BB | 0.9693   | 1.26072e4   | 194.48280 | 98.9298 |
| 2   | 38.664     | BB | 0.8501   | 136.38406   | 2.02415   | 1.0702  |

S99

*rac*-**3bb**: ChiralPak AD-H, *n*-hex/*i*-PrOH = 95:5, 0.5 mL/min, 254 nm,  $t_R = 15.128$  and 26.477 min, *dr* > 99:1.

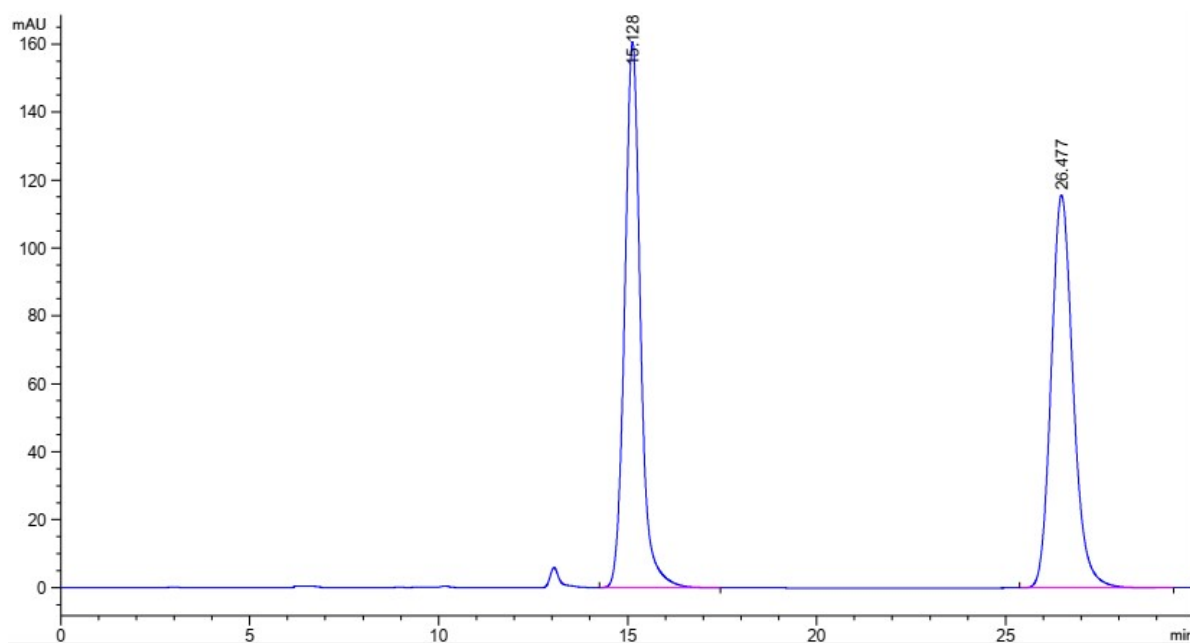

| 峰 # | 保留时间 [min] | 类型 | 峰宽 [min] | 峰面积 [mAU*s] | 峰高 [mAU]  | 峰面积 %   |
|-----|------------|----|----------|-------------|-----------|---------|
| 1   | 15.128     | BB | 0.4410   | 4656.90479  | 160.73123 | 49.9209 |
| 2   | 26.477     | BB | 0.6233   | 4671.66992  | 115.65311 | 50.0791 |

*enan*-**3bb**: ChiralPak AD-H, *n*-hex/*i*-PrOH = 95:5, 0.5 mL/min, 254 nm,  $t_R(\text{major}) = 15.452$  min,  $t_R(\text{minor}) = 26.122$  min, 98 % *ee*.

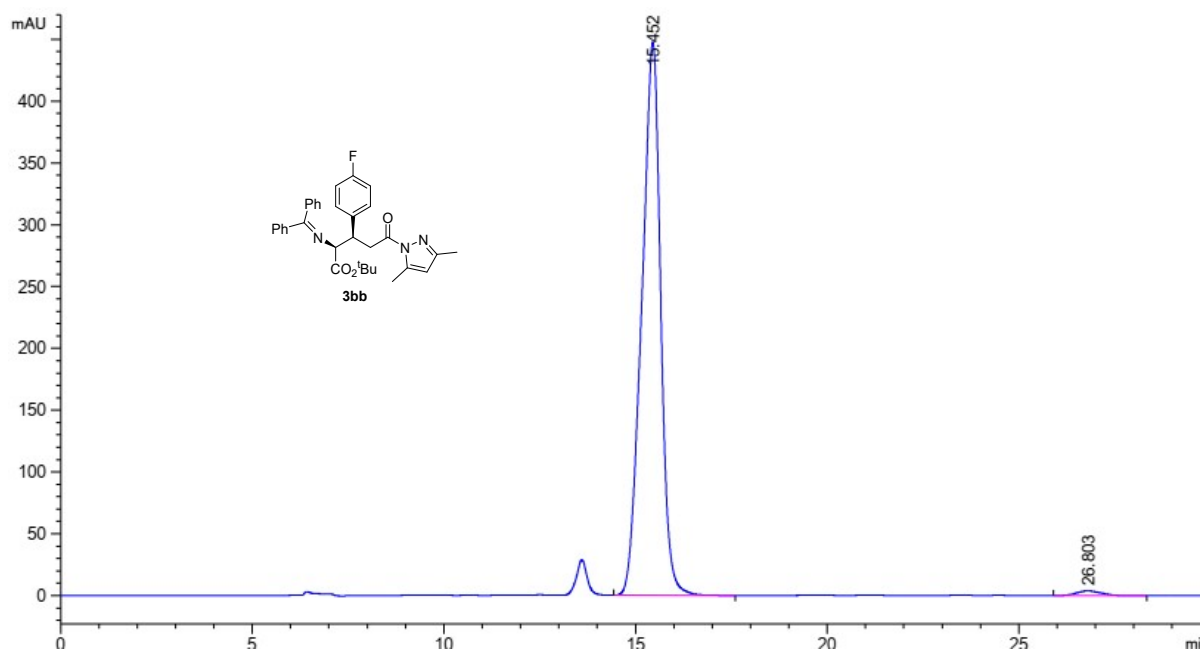

| 峰 # | 保留时间 [min] | 类型 | 峰宽 [min] | 峰面积 [mAU*s] | 峰高 [mAU]  | 峰面积 %   |
|-----|------------|----|----------|-------------|-----------|---------|
| 1   | 15.452     | BB | 0.4996   | 1.52856e4   | 447.41663 | 98.9137 |
| 2   | 26.803     | BB | 0.6534   | 167.87830   | 3.77070   | 1.0863  |

## S100

*rac*-**3bc**: ChiralPak AD-H, *n*-hex/*i*-PrOH = 90:10, 1.0 mL/min, 254 nm,  $t_R$  = 5.510 and 9.231 min, dr > 99:1.

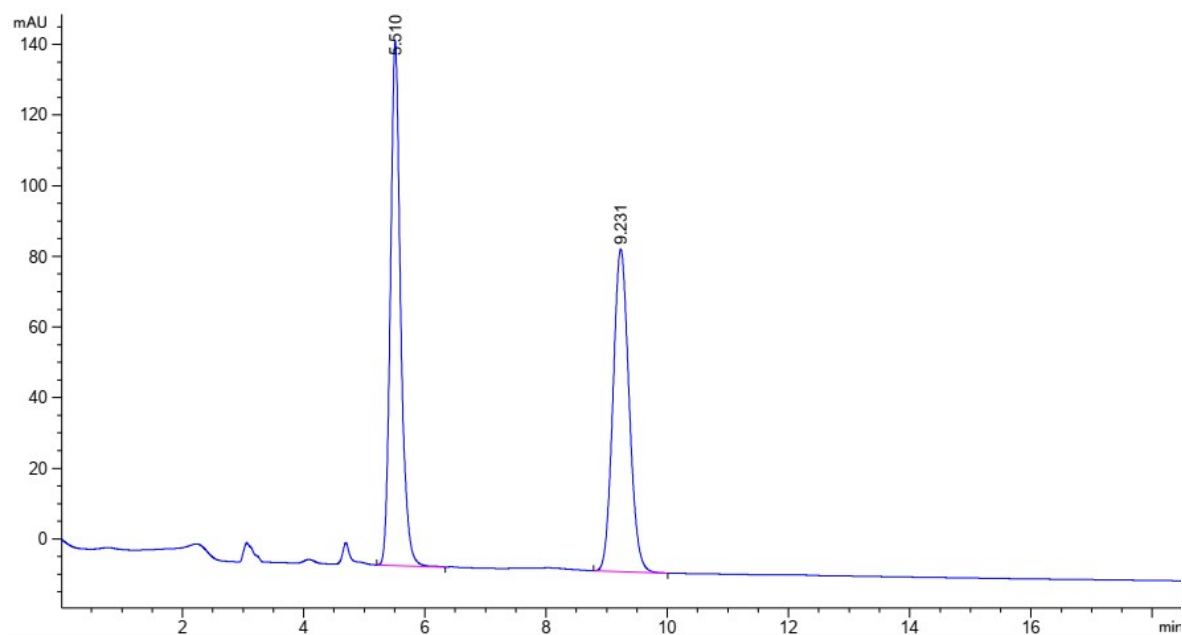

| 峰 # | 保留时间 [min] | 类型 | 峰宽 [min] | 峰面积 [mAU*s] | 峰高 [mAU]  | 峰面积 %   |
|-----|------------|----|----------|-------------|-----------|---------|
| 1   | 5.510      | VB | 0.1769   | 1743.13196  | 148.56671 | 50.9063 |
| 2   | 9.231      | BB | 0.2859   | 1681.06775  | 91.28247  | 49.0937 |

*enan*-**3bc**: ChiralPak AD-H, *n*-hex/*i*-PrOH = 90:10, 1.0 mL/min, 254 nm,  $t_R$ (major) = 5.513 min,  $t_R$ (minor) = 9.225 min, 98.5 % ee.

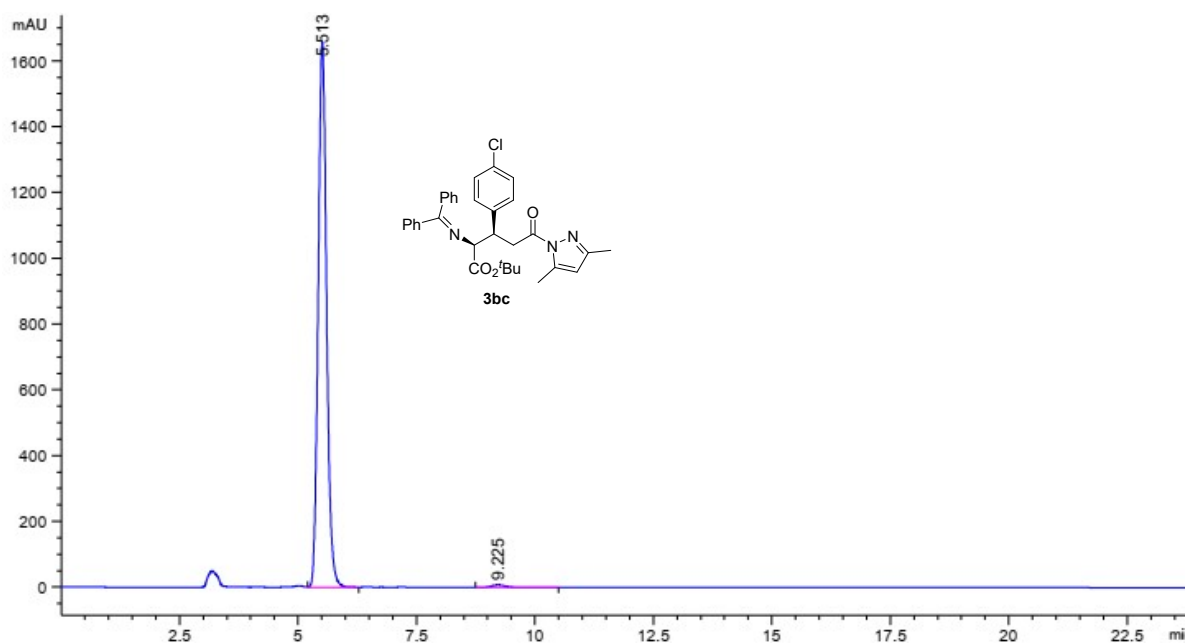

| 峰 # | 保留时间 [min] | 类型 | 峰宽 [min] | 峰面积 [mAU*s] | 峰高 [mAU]   | 峰面积 %   |
|-----|------------|----|----------|-------------|------------|---------|
| 1   | 5.513      | VB | 0.1894   | 2.03783e4   | 1657.51709 | 99.2687 |
| 2   | 9.225      | BB | 0.3212   | 150.13121   | 7.35409    | 0.7313  |

## S101

*rac*-**3bd**: ChiralPak AD-H, *n*-hex/*i*-PrOH = 90:10, 1.0 mL/min, 254 nm,  $t_R = 5.016$  and 8.588 min, dr > 99:1.

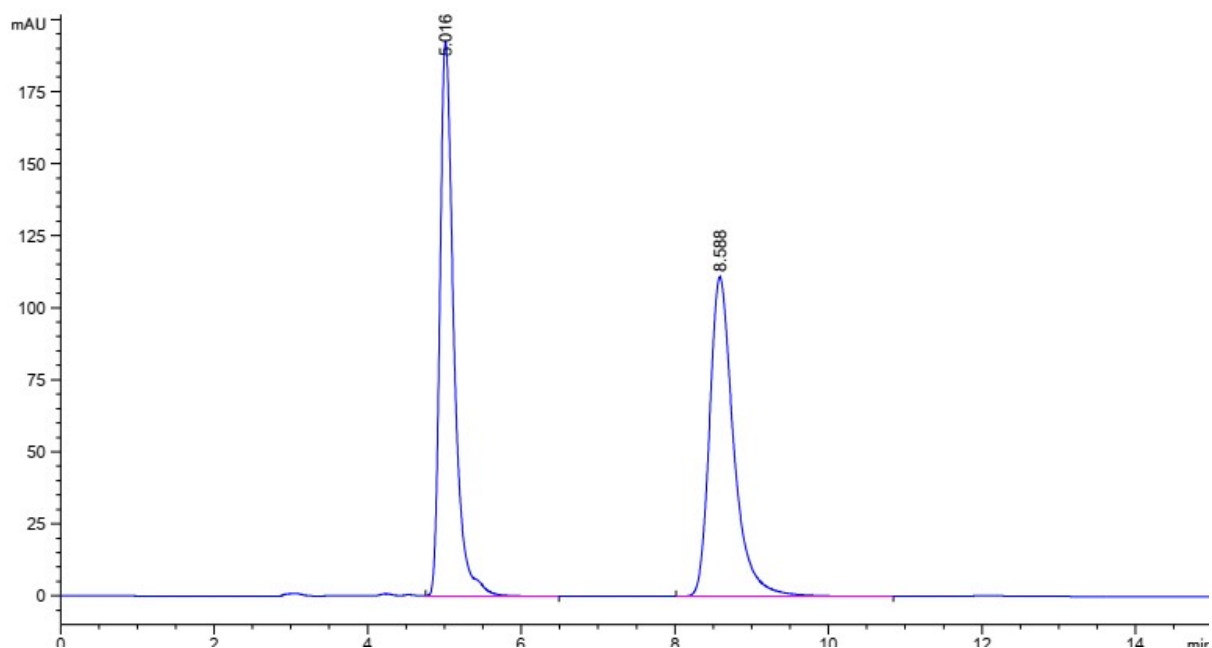

| 峰 # | 保留时间 [min] | 类型 | 峰宽 [min] | 峰面积 [mAU*s] | 峰高 [mAU]  | 峰面积 %   |
|-----|------------|----|----------|-------------|-----------|---------|
| 1   | 5.016      | VB | 0.1904   | 2429.68726  | 192.31837 | 50.2274 |
| 2   | 8.588      | BB | 0.3273   | 2407.68359  | 110.91646 | 49.7726 |

*enan*-**3bd**: ChiralPak AD-H, *n*-hex/*i*-PrOH = 90:10, 1.0 mL/min, 254 nm,  $t_R(\text{major}) = 4.984$  min,  $t_R(\text{minor}) = 8.483$  min, 98.1% *ee*.

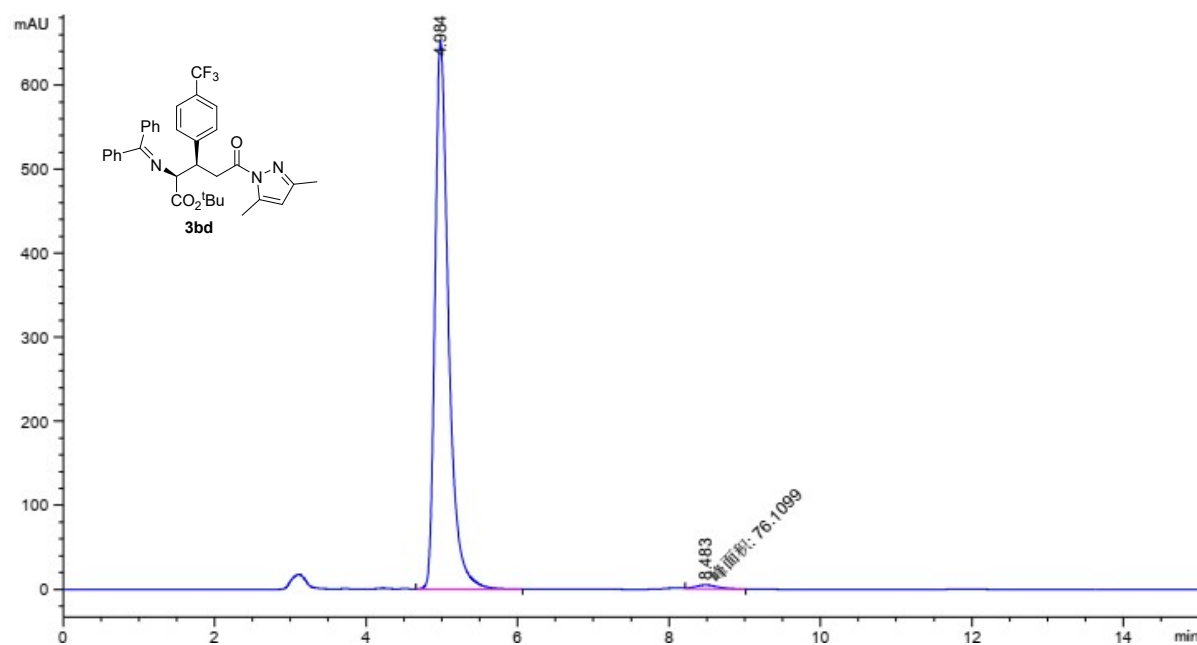

| 峰 # | 保留时间 [min] | 类型 | 峰宽 [min] | 峰面积 [mAU*s] | 峰高 [mAU]  | 峰面积 %   |
|-----|------------|----|----------|-------------|-----------|---------|
| 1   | 4.984      | VB | 0.1884   | 8118.44141  | 651.39435 | 99.0712 |
| 2   | 8.483      | MM | 0.2955   | 76.10994    | 4.29308   | 0.9288  |

S102

*rac*-**3be**: ChiralPak AD-H, *n*-hex/*i*-PrOH = 95:5, 1.0 mL/min, 254 nm,  $t_R(\text{major}) = 6.914$  and  $11.531$  min, *dr* > 99:1.

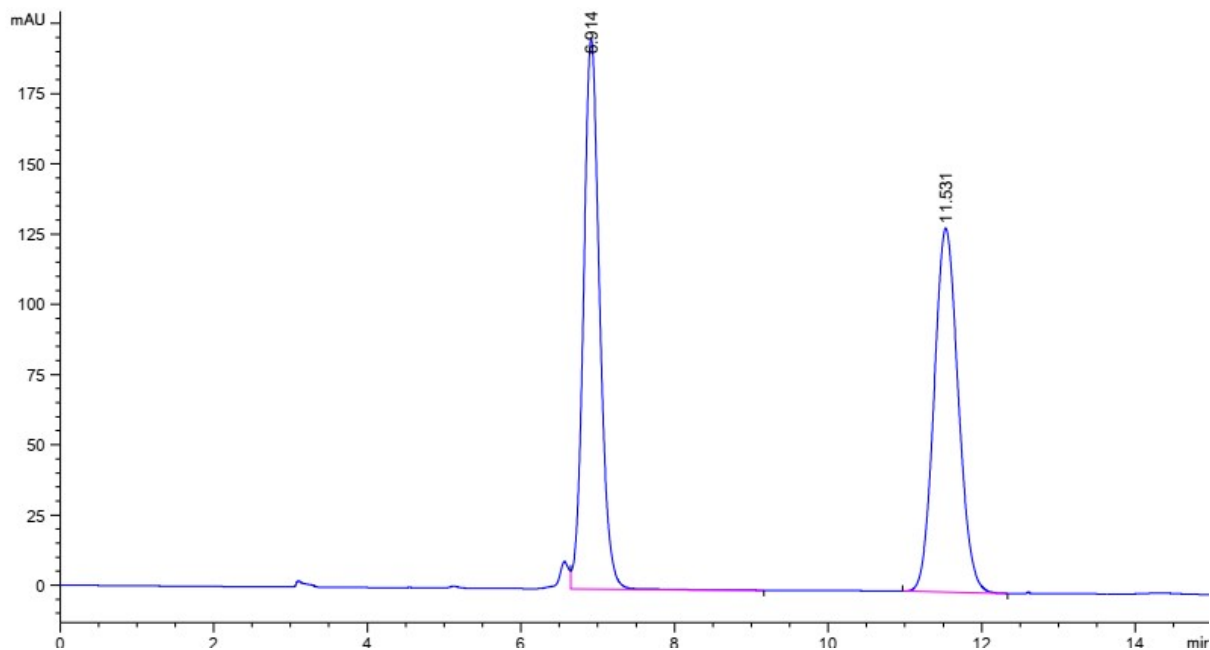

| 峰 # | 保留时间 [min] | 类型 | 峰宽 [min] | 峰面积 [mAU*s] | 峰高 [mAU]  | 峰面积 %   |
|-----|------------|----|----------|-------------|-----------|---------|
| 1   | 6.914      | VB | 0.2234   | 2863.43530  | 196.01173 | 50.3267 |
| 2   | 11.531     | BB | 0.3385   | 2826.25464  | 129.55185 | 49.6733 |

*enan*-**3be**: ChiralPak AD-H, *n*-hex/*i*-PrOH = 95:5, 1.0 mL/min, 254 nm,  $t_R(\text{major}) = 6.929$  min,  $t_R(\text{minor}) = 11.534$  min, 97.8% *ee*.

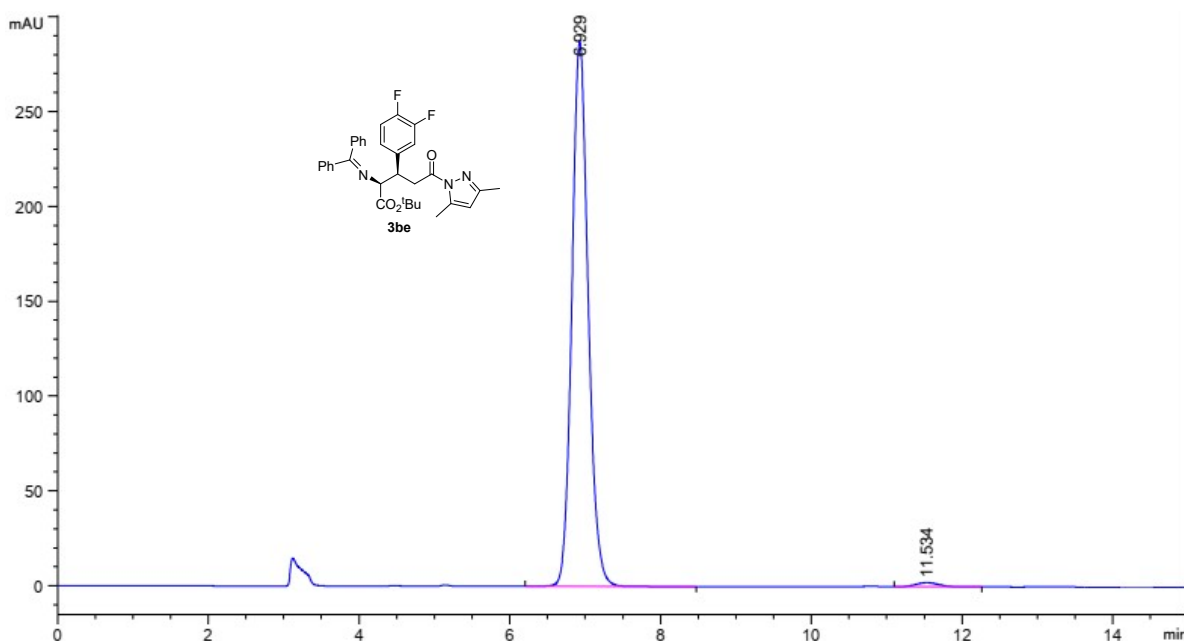

| 峰 # | 保留时间 [min] | 类型 | 峰宽 [min] | 峰面积 [mAU*s] | 峰高 [mAU]  | 峰面积 %   |
|-----|------------|----|----------|-------------|-----------|---------|
| 1   | 6.929      | BB | 0.2307   | 4321.90771  | 287.02921 | 98.9134 |
| 2   | 11.534     | BB | 0.3329   | 47.47823    | 2.19855   | 1.0866  |

S103

*rac*-**3bf**: ChiralPak AD-H, *n*-hex/*i*-PrOH = 95:5, 0.5 mL/min, 254 nm,  $t_R(\text{major}) = 14.654$  and  $16.502$  min,  $dr > 99:1$ .

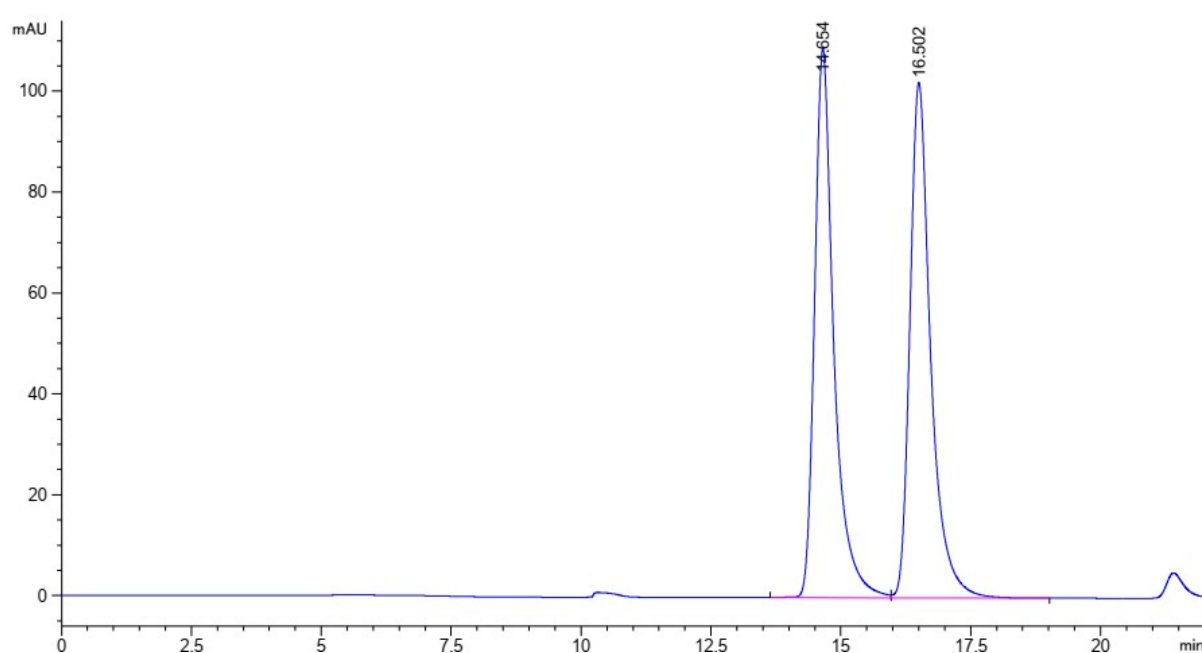

| 峰 # | 保留时间 [min] | 类型 | 峰宽 [min] | 峰面积 [mAU*s] | 峰高 [mAU]  | 峰面积 %   |
|-----|------------|----|----------|-------------|-----------|---------|
| 1   | 14.654     | BV | 0.3844   | 2815.62500  | 108.96989 | 49.8703 |
| 2   | 16.502     | VB | 0.4133   | 2830.27441  | 102.14868 | 50.1297 |

*enan*-**3bf**: ChiralPak AD-H, *n*-hex/*i*-PrOH = 95:5, 0.5 mL/min, 254 nm,  $t_R(\text{major}) = 14.634$  min,  $t_R(\text{minor}) = 16.468$  min, 98.3% *ee*.

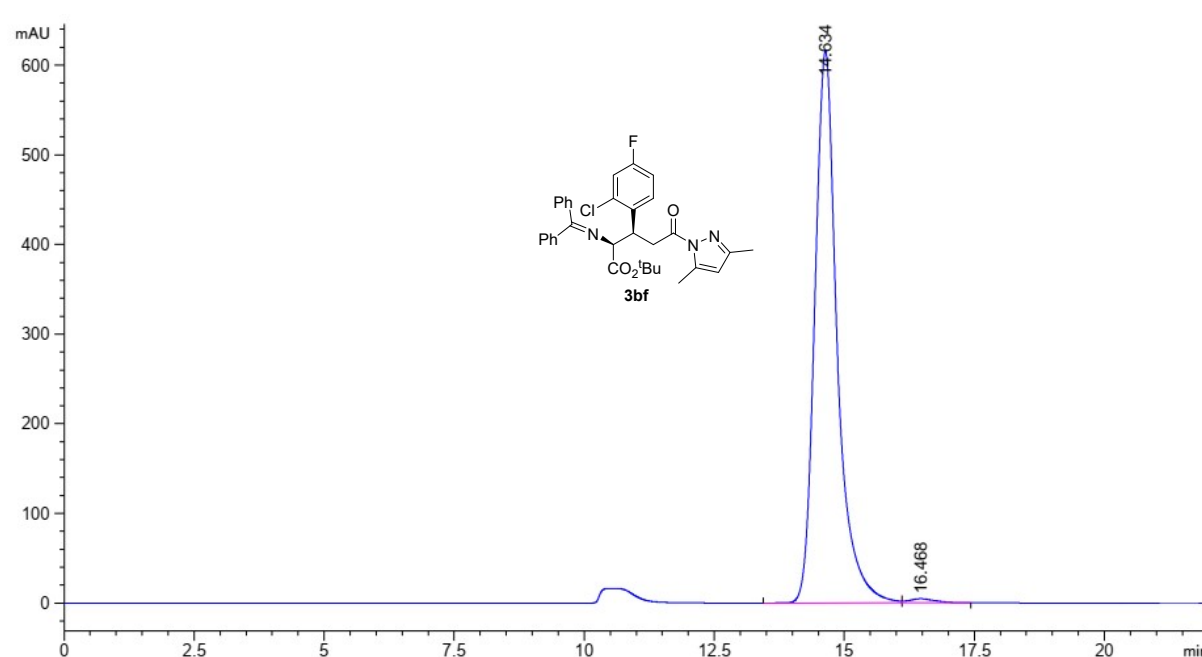



| 峰 # | 保留时间 [min] | 类型 | 峰宽 [min] | 峰面积 [mAU*s] | 峰高 [mAU]  | 峰面积 %   |
|-----|------------|----|----------|-------------|-----------|---------|
| 1   | 14.634     | BV | 0.4548   | 1.84563e4   | 615.48553 | 99.1277 |
| 2   | 16.468     | VB | 0.4883   | 162.41096   | 4.67544   | 0.8723  |

S104

*rac*-**3bg**: ChiralPak AD-H, *n*-hex/*i*-PrOH = 95:5, 0.5 mL/min, 254 nm,  $t_R$ (major) = 13.846 and 21.969 min, *dr* > 99:1.

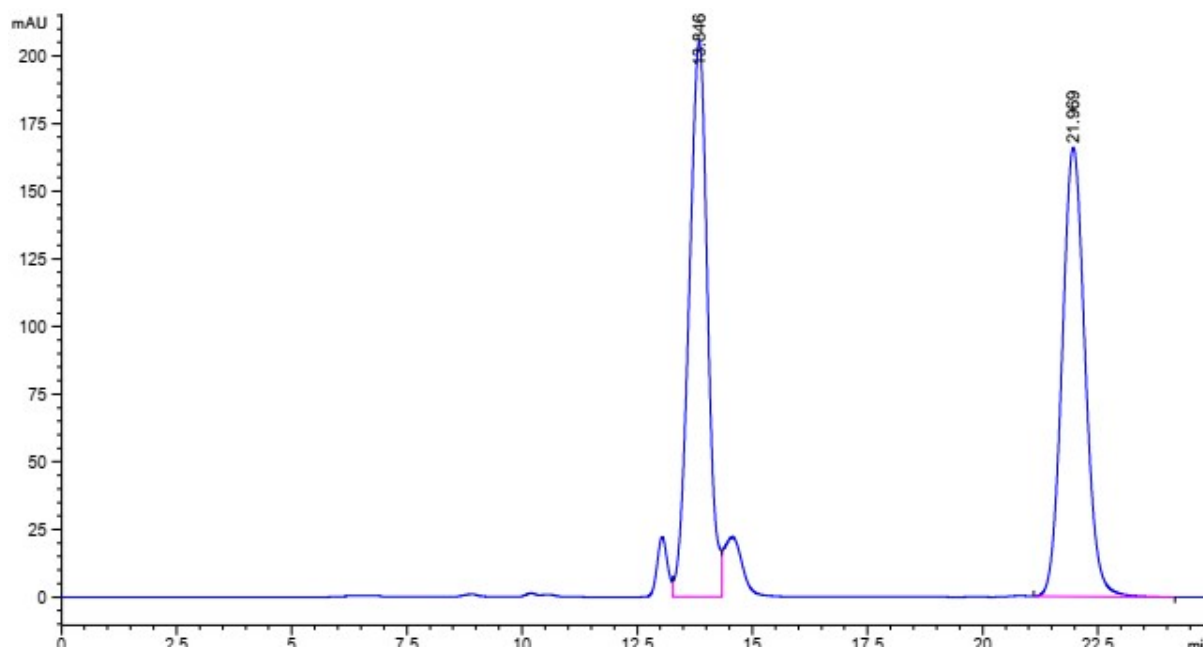

| 峰 # | 保留时间 [min] | 类型 | 峰宽 [min] | 峰面积 [mAU*s] | 峰高 [mAU]  | 峰面积 %   |
|-----|------------|----|----------|-------------|-----------|---------|
| 1   | 13.846     | VV | 0.4283   | 5727.67773  | 205.40201 | 50.0203 |
| 2   | 21.969     | BB | 0.5351   | 5723.01807  | 166.03745 | 49.9797 |

*enan*-**3bg**: ChiralPak AD-H, *n*-hex/*i*-PrOH = 95:5, 0.5 mL/min, 254 nm,  $t_R$ (major) = 13.978 min,  $t_R$ (minor) = 22.215 min, 98.4% *ee*.

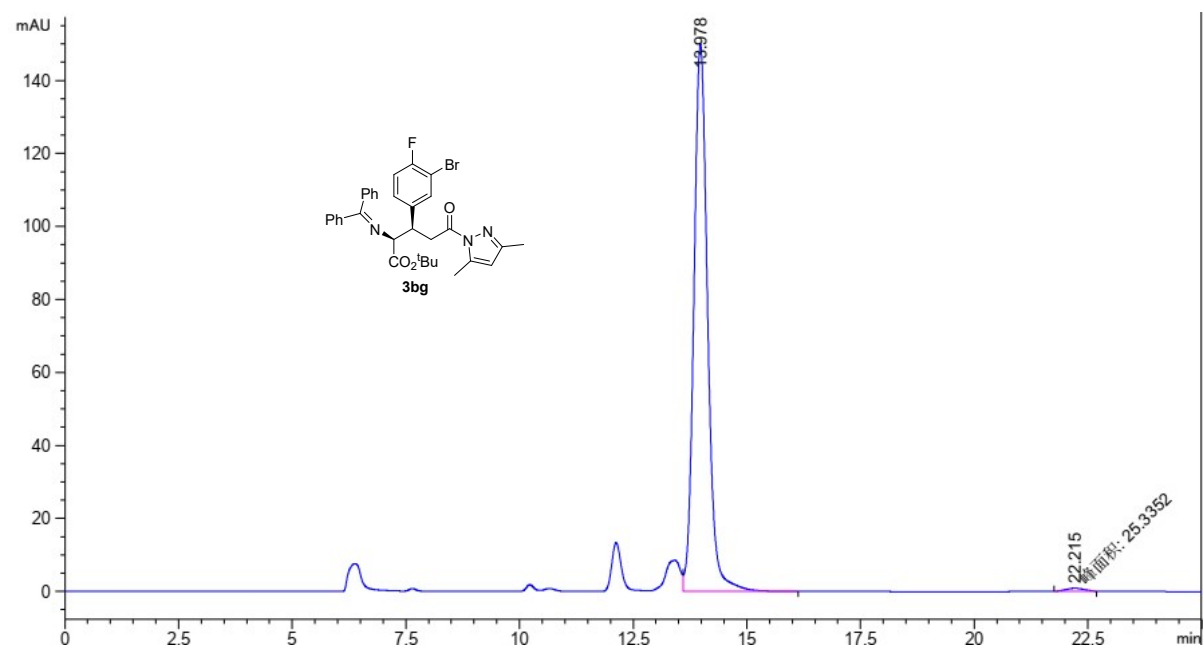

| 峰 # | 保留时间 [min] | 类型 | 峰宽 [min] | 峰面积 [mAU*s] | 峰高 [mAU]   | 峰面积 %   |
|-----|------------|----|----------|-------------|------------|---------|
| 1   | 13.978     | VB | 0.3226   | 3142.62695  | 149.90631  | 99.2003 |
| 2   | 22.215     | MM | 0.4925   | 25.33522    | 8.57378e-1 | 0.7997  |

S105

*rac*-**3bh**: ChiralPak AD-H, *n*-hex/*i*-PrOH = 90:10, 1.0 mL/min, 254 nm,  $t_R(\text{major}) = 5.203$  and  $7.220$  min,  $dr > 99:1$ .

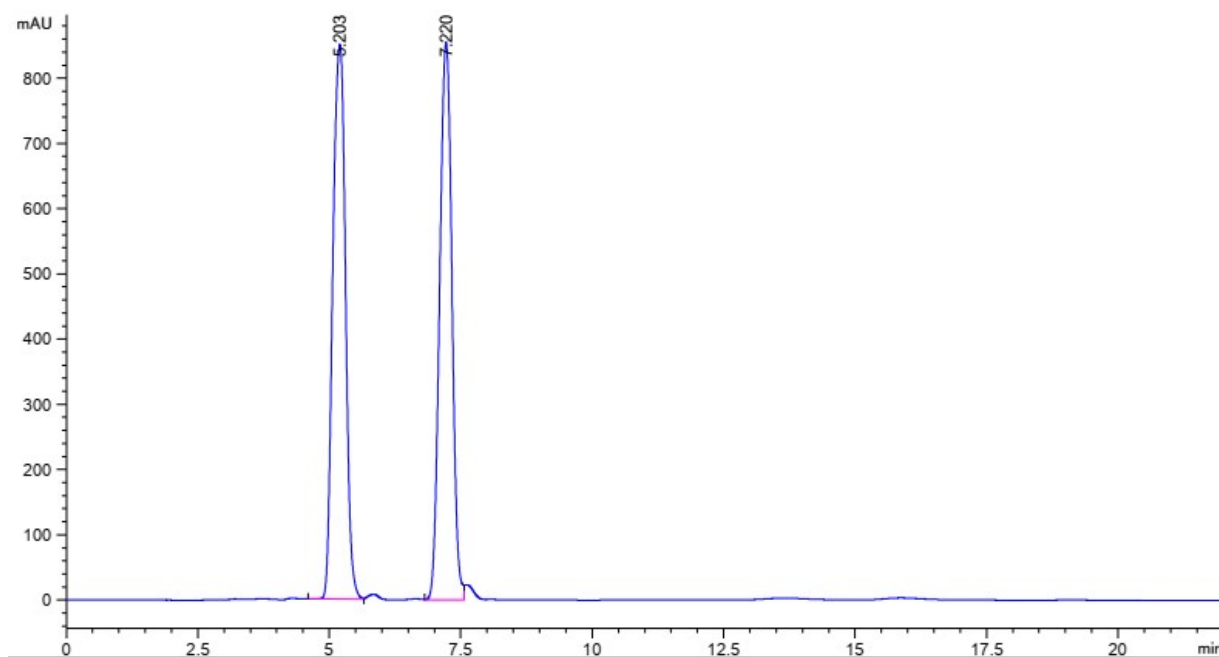

| 峰 # | 保留时间 [min] | 类型 | 峰宽 [min] | 峰面积 [mAU*s] | 峰高 [mAU]  | 峰面积 %   |
|-----|------------|----|----------|-------------|-----------|---------|
| 1   | 5.203      | BV | 0.2741   | 1.42282e4   | 850.63849 | 50.5148 |
| 2   | 7.220      | VV | 0.2612   | 1.39382e4   | 854.89087 | 49.4852 |

*enan*-**3bh**: ChiralPak AD-H, *n*-hex/*i*-PrOH = 90:10, 1.0 mL/min, 254 nm,  $t_R(\text{major}) = 5.147$  min,  $t_R(\text{minor}) = 7.191$  min, 97% *ee*.

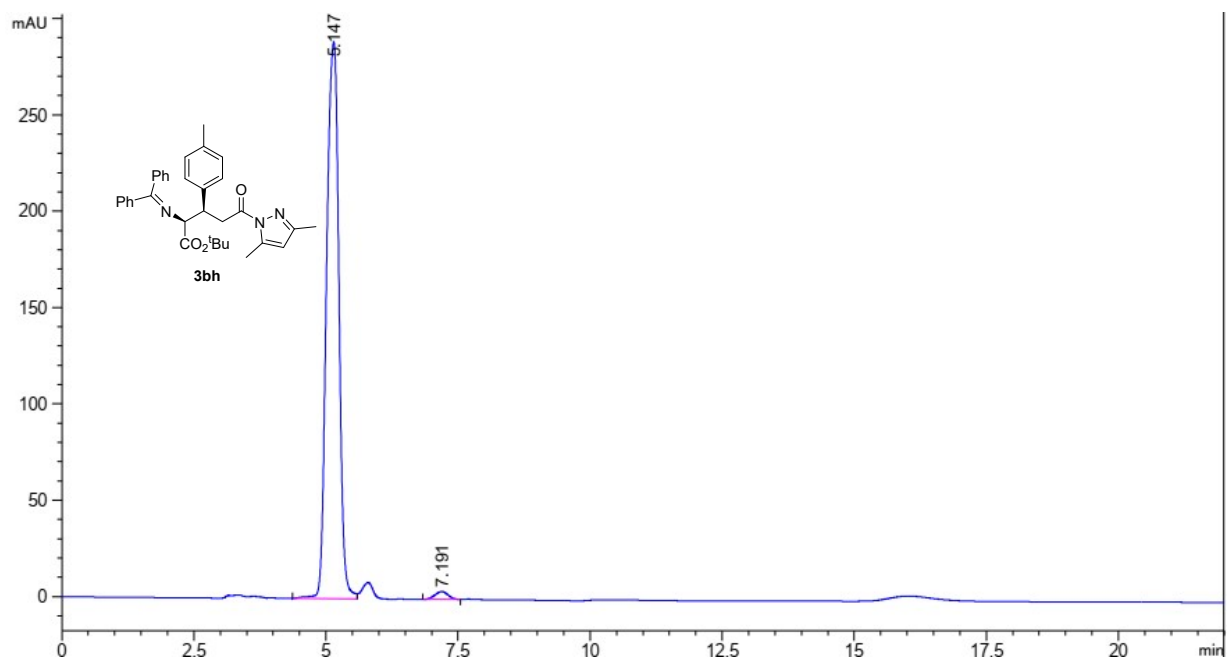

| 峰 # | 保留时间 [min] | 类型 | 峰宽 [min] | 峰面积 [mAU*s] | 峰高 [mAU]  | 峰面积 %   |
|-----|------------|----|----------|-------------|-----------|---------|
| 1   | 5.147      | BV | 0.2628   | 4676.67383  | 288.93625 | 98.5326 |
| 2   | 7.191      | BB | 0.2683   | 69.64677    | 4.07631   | 1.4674  |

S106

*rac*-**3bi**: ChiralPak AD-H, *n*-hex/*i*-PrOH = 90:10, 1.0 mL/min, 254 nm,  $t_R$ (major) = 6.644 and 12.058 min, dr > 99:1.

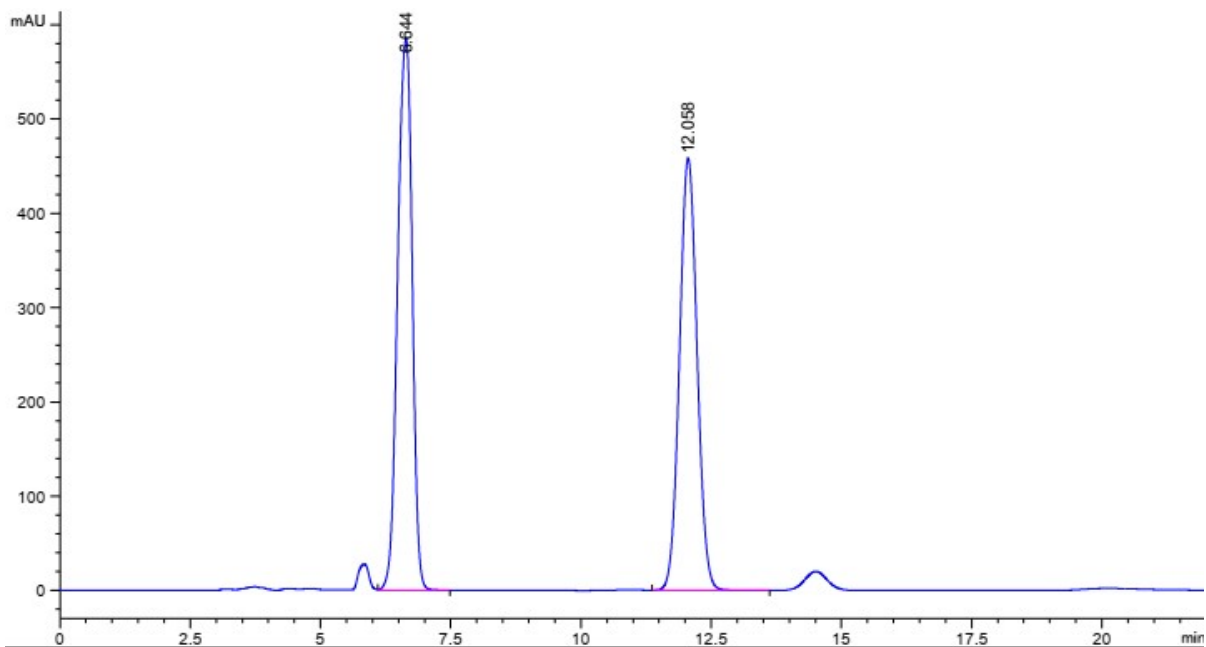

| 峰 # | 保留时间 [min] | 类型 | 峰宽 [min] | 峰面积 [mAU*s] | 峰高 [mAU]  | 峰面积 %   |
|-----|------------|----|----------|-------------|-----------|---------|
| 1   | 6.644      | VB | 0.3143   | 1.13511e4   | 585.17999 | 51.2293 |
| 2   | 12.058     | BB | 0.3681   | 1.08063e4   | 458.23309 | 48.7707 |

**enan-3bi**: ChiralPak AD-H, *n*-hex/*i*-PrOH = 90:10, 1.0 mL/min, 254 nm,  $t_R(\text{major}) = 6.600$  min,  $t_R(\text{minor}) = 12.092$  min, 96% *ee*.

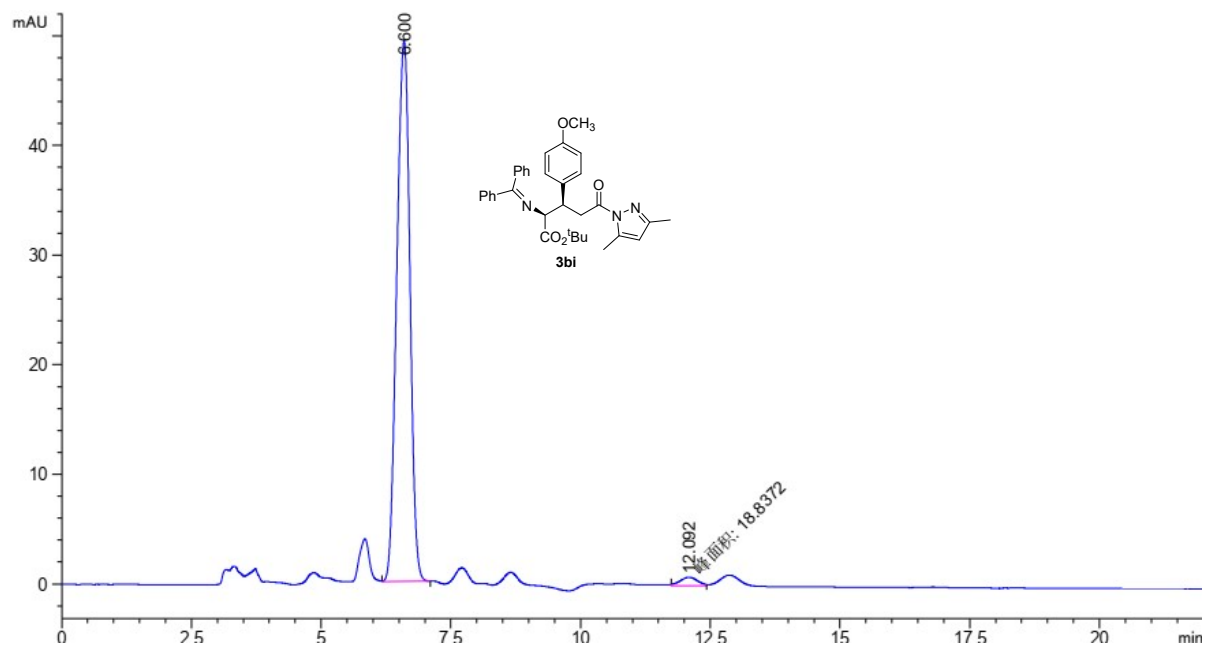

| 峰 # | 保留时间 [min] | 类型 | 峰宽 [min] | 峰面积 [mAU*s] | 峰高 [mAU]   | 峰面积 %   |
|-----|------------|----|----------|-------------|------------|---------|
| 1   | 6.600      | VB | 0.2824   | 863.90839   | 49.31248   | 97.8661 |
| 2   | 12.092     | MM | 0.4006   | 18.83720    | 7.83677e-1 | 2.1339  |

S107

**rac-3bk**: ChiralPak AD-H, *n*-hex/*i*-PrOH = 90:10, 1.0 mL/min, 254 nm,  $t_R(\text{major}) = 5.605$  and  $6.501$  min, *dr* > 99:1.

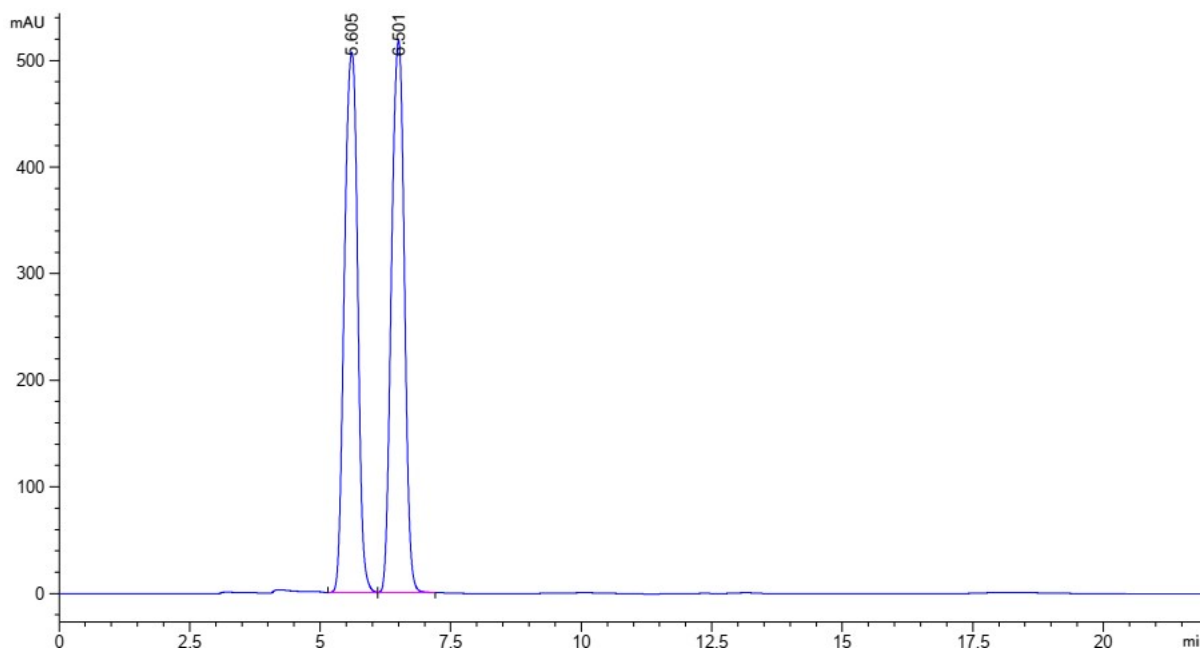

| 峰 # | 保留时间 [min] | 类型 | 峰宽 [min] | 峰面积 [mAU*s] | 峰高 [mAU]  | 峰面积 %   |
|-----|------------|----|----------|-------------|-----------|---------|
| 1   | 5.605      | BB | 0.2854   | 8878.02051  | 506.74911 | 50.0265 |
| 2   | 6.501      | BB | 0.2777   | 8868.62500  | 517.99438 | 49.9735 |

**enan-3bk**: ChiralPak AD-H, *n*-hex/*i*-PrOH = 90:10, 1.0 mL/min, 254 nm,  $t_R(\text{major}) = 5.484$  min,  $t_R(\text{minor}) = 6.355$  min, 97.2% *ee*.

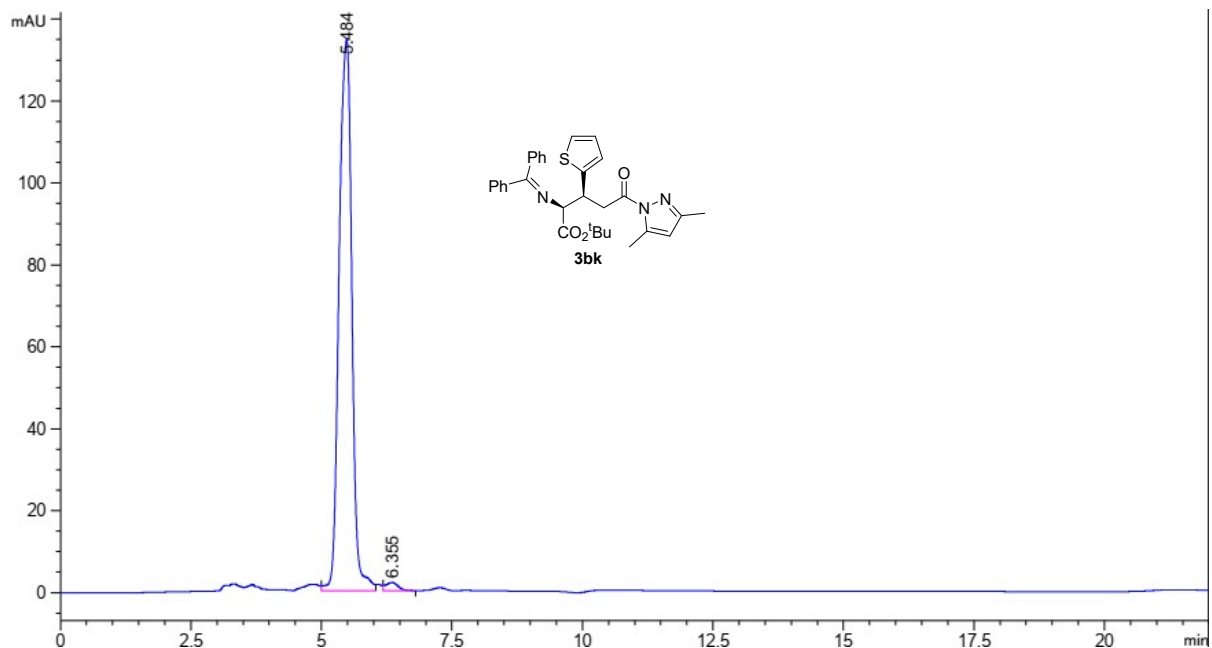

| 峰 # | 保留时间 [min] | 类型 | 峰宽 [min] | 峰面积 [mAU*s] | 峰高 [mAU]  | 峰面积 %   |
|-----|------------|----|----------|-------------|-----------|---------|
| 1   | 5.484      | VV | 0.2738   | 2280.42822  | 134.51379 | 98.6218 |
| 2   | 6.355      | VB | 0.2503   | 31.86747    | 1.95354   | 1.3782  |

S108

**rac-4aa**: ChiralPak AD-H, *n*-hex/*i*-PrOH = 90:10, 1.0 mL/min, 230 nm,  $t_R = 17.508$  and 23.886 min.

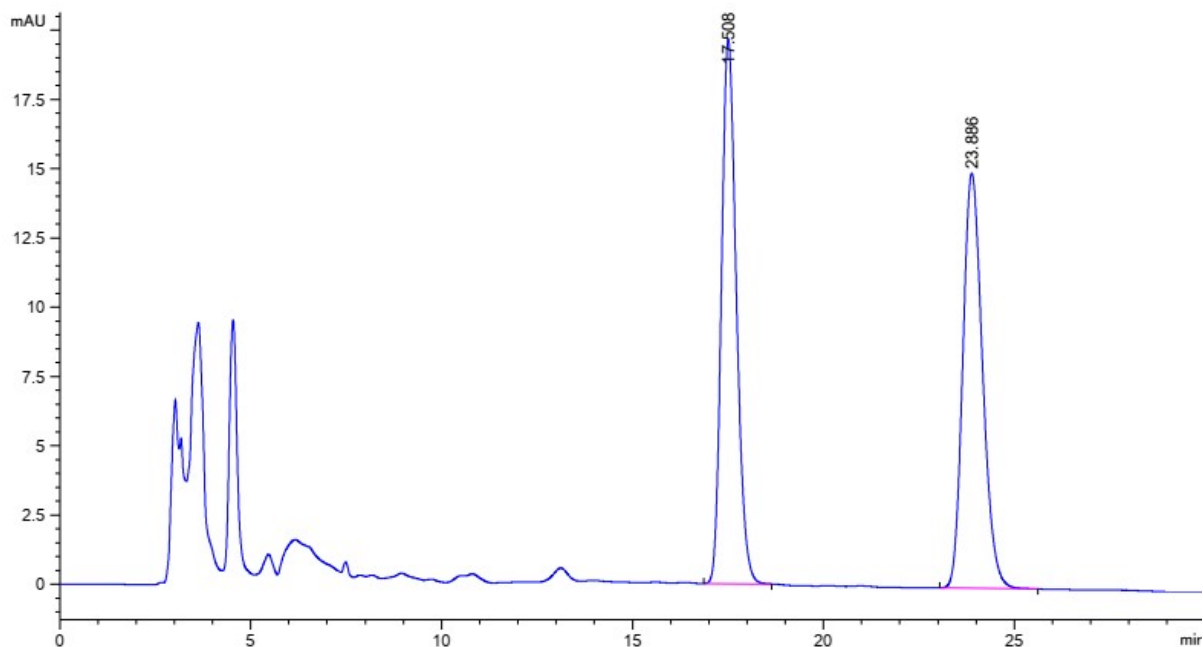

| 峰 # | 保留时间 [min] | 类型 | 峰宽 [min] | 峰面积 [mAU*s] | 峰高 [mAU] | 峰面积 %   |
|-----|------------|----|----------|-------------|----------|---------|
| 1   | 17.508     | BB | 0.4194   | 530.75739   | 19.62968 | 49.7764 |
| 2   | 23.886     | BB | 0.5542   | 535.52612   | 14.97653 | 50.2236 |

**enan-4aa**: ChiralPak AD-H, *n*-hex/*i*-PrOH = 90:10, 1.0 mL/min, 230 nm,  $t_R(\text{major}) = 17.442$  min,  $t_R(\text{minor}) = 23.850$  min, 99.2% *ee*.

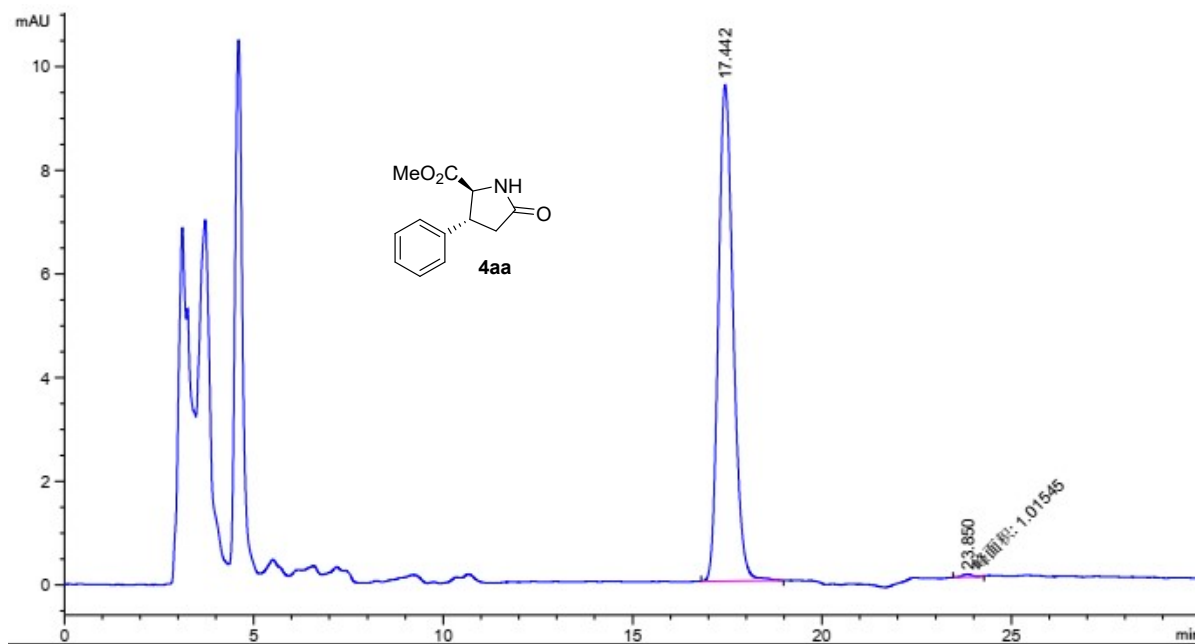

| 峰 # | 保留时间 [min] | 类型 | 峰宽 [min] | 峰面积 [mAU*s] | 峰高 [mAU]   | 峰面积 %   |
|-----|------------|----|----------|-------------|------------|---------|
| 1   | 17.442     | BB | 0.4181   | 259.46307   | 9.57684    | 99.6102 |
| 2   | 23.850     | MM | 0.3192   | 1.01545     | 5.30211e-2 | 0.3898  |

S109

**rac-4ab**: ChiralPak AD-H, *n*-hex/*i*-PrOH = 90:10, 1.0 mL/min, 230 nm,  $t_R = 14.996$  and 21.331 min.

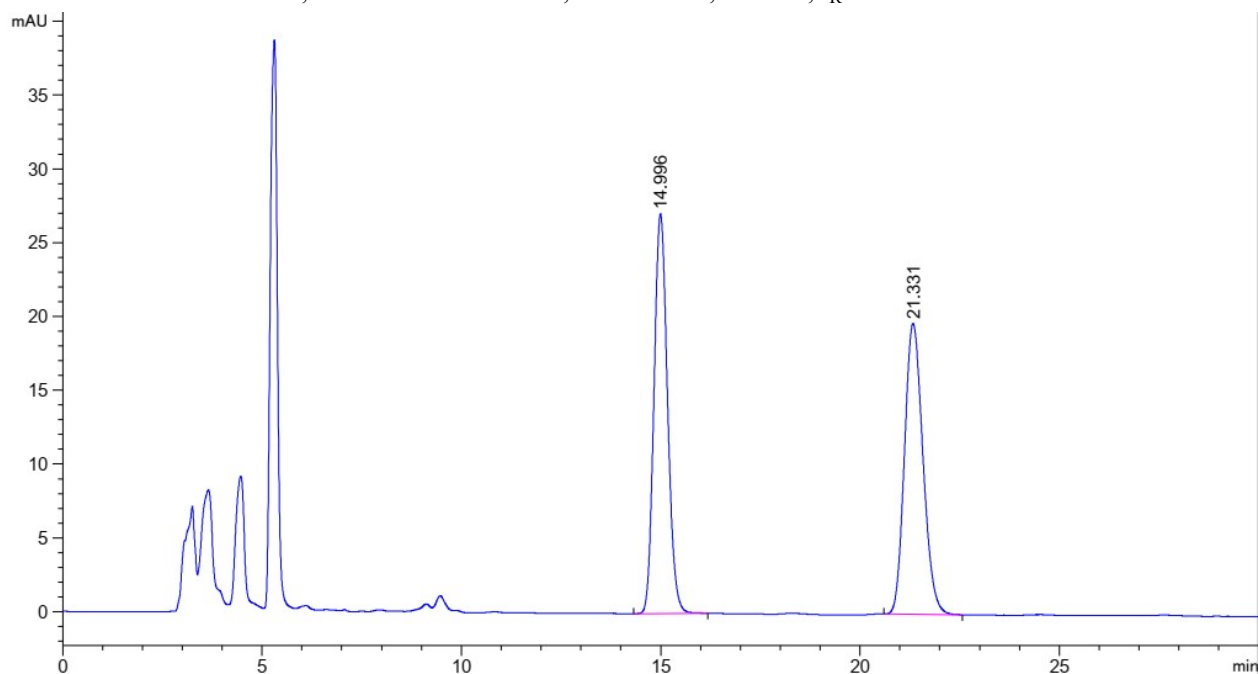

| 峰 # | 保留时间 [min] | 类型 | 峰宽 [min] | 峰面积 [mAU*s] | 峰高 [mAU] | 峰面积 %   |
|-----|------------|----|----------|-------------|----------|---------|
| 1   | 14.996     | BB | 0.3652   | 636.78210   | 27.09485 | 50.1329 |
| 2   | 21.331     | BB | 0.5000   | 633.40680   | 19.70706 | 49.8671 |

**enan-4ab**: ChiralPak AD-H, *n*-hex/*i*-PrOH = 90:10, 1.0 mL/min, 230 nm,  $t_R(\text{major}) = 16.263$  min,  $t_R(\text{minor}) = 22.227$  min.

min, 97.5% ee.

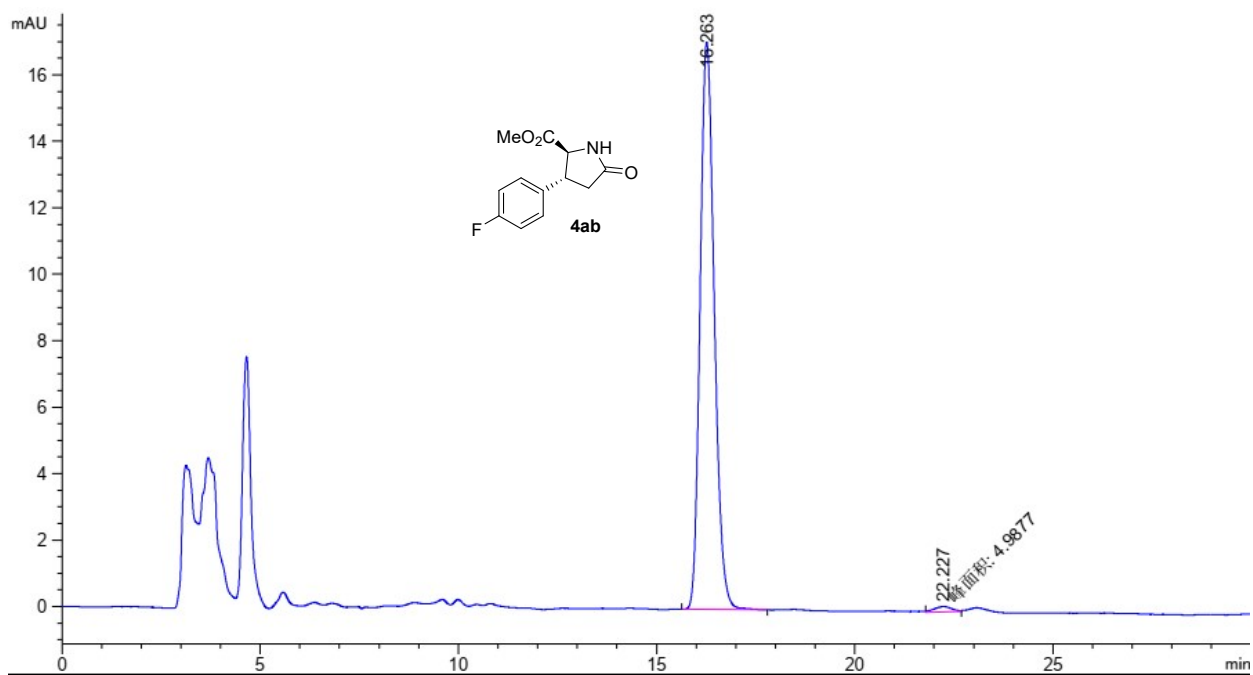

| 峰 # | 保留时间 [min] | 类型 | 峰宽 [min] | 峰面积 [mAU*s] | 峰高 [mAU]   | 峰面积 %   |
|-----|------------|----|----------|-------------|------------|---------|
| 1   | 16.263     | BB | 0.3860   | 424.59796   | 17.08199   | 98.8390 |
| 2   | 22.227     | MM | 0.5164   | 4.98770     | 1.60961e-1 | 1.1610  |

S110

*rac*-4ac: ChiralPak AD-H, *n*-hex/*i*-PrOH = 80:20, 1.0 mL/min, 230 nm,  $t_R$  = 8.528 and 11.827 min.

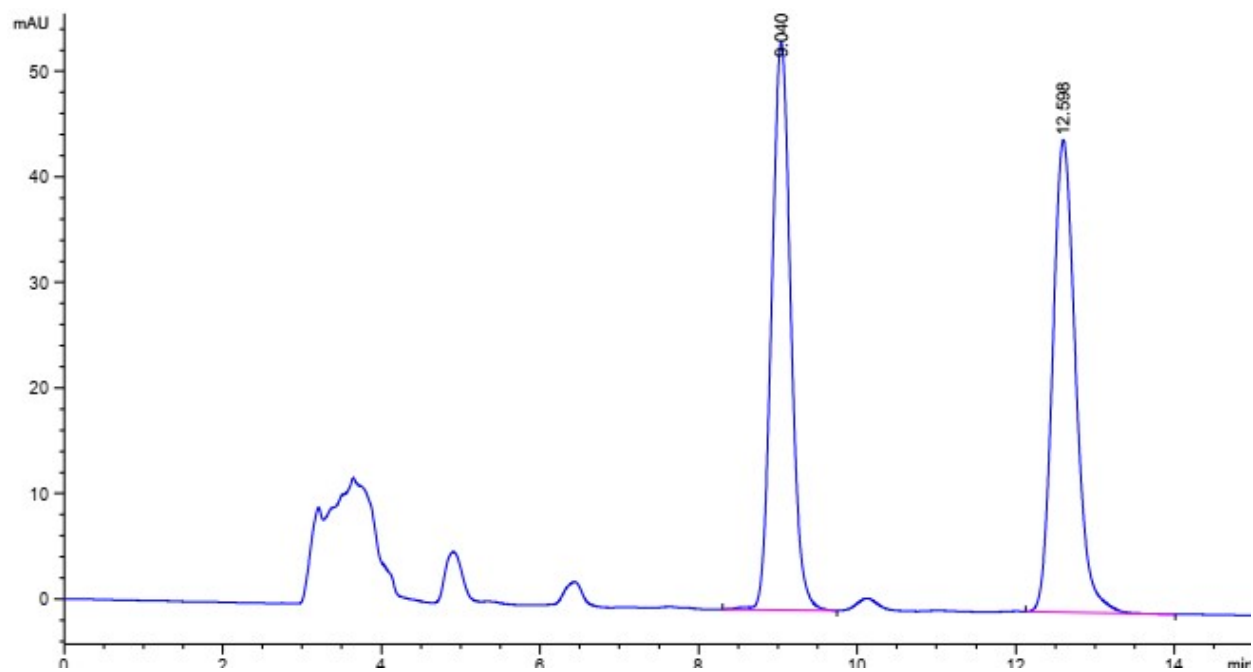

| 峰 # | 保留时间 [min] | 类型 | 峰宽 [min] | 峰面积 [mAU*s] | 峰高 [mAU]  | 峰面积 %   |
|-----|------------|----|----------|-------------|-----------|---------|
| 1   | 8.528      | BB | 0.2077   | 2322.38770  | 171.78299 | 49.2872 |
| 2   | 11.827     | BB | 0.2913   | 2389.55859  | 126.55750 | 50.7128 |

*enan*-**4ac** (by using *S*-CSB cat.): ChiralPak AD-H, *n*-hex/*i*-PrOH = 80:20, 1.0 mL/min, 230 nm,  $t_R(\text{major}) = 8.933$  min,  $t_R(\text{minor}) = 12.187$  min, 94% *ee*.

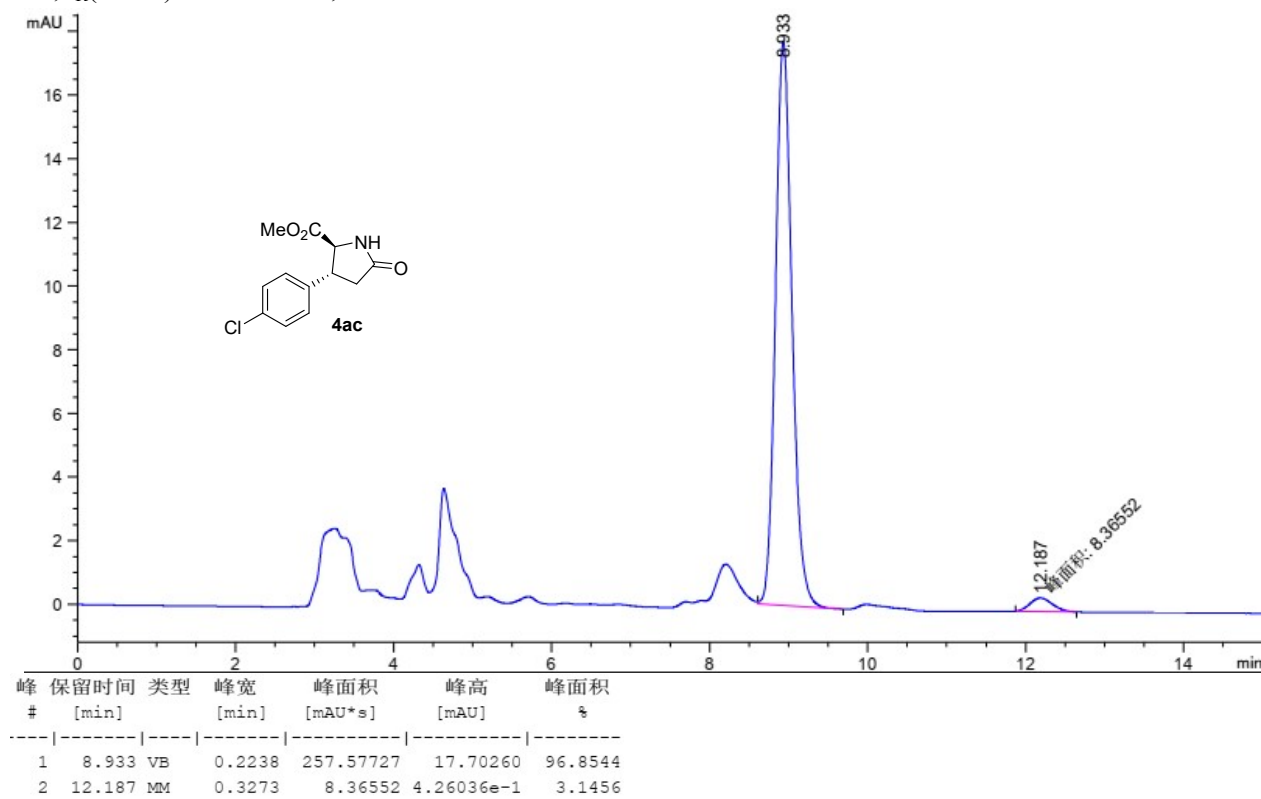

S111

*rac*-**4ac**: ChiralPak AD-H, *n*-hex/*i*-PrOH = 80:20, 1.0 mL/min, 230 nm,  $t_R = 9.040$  and 12.598 min.

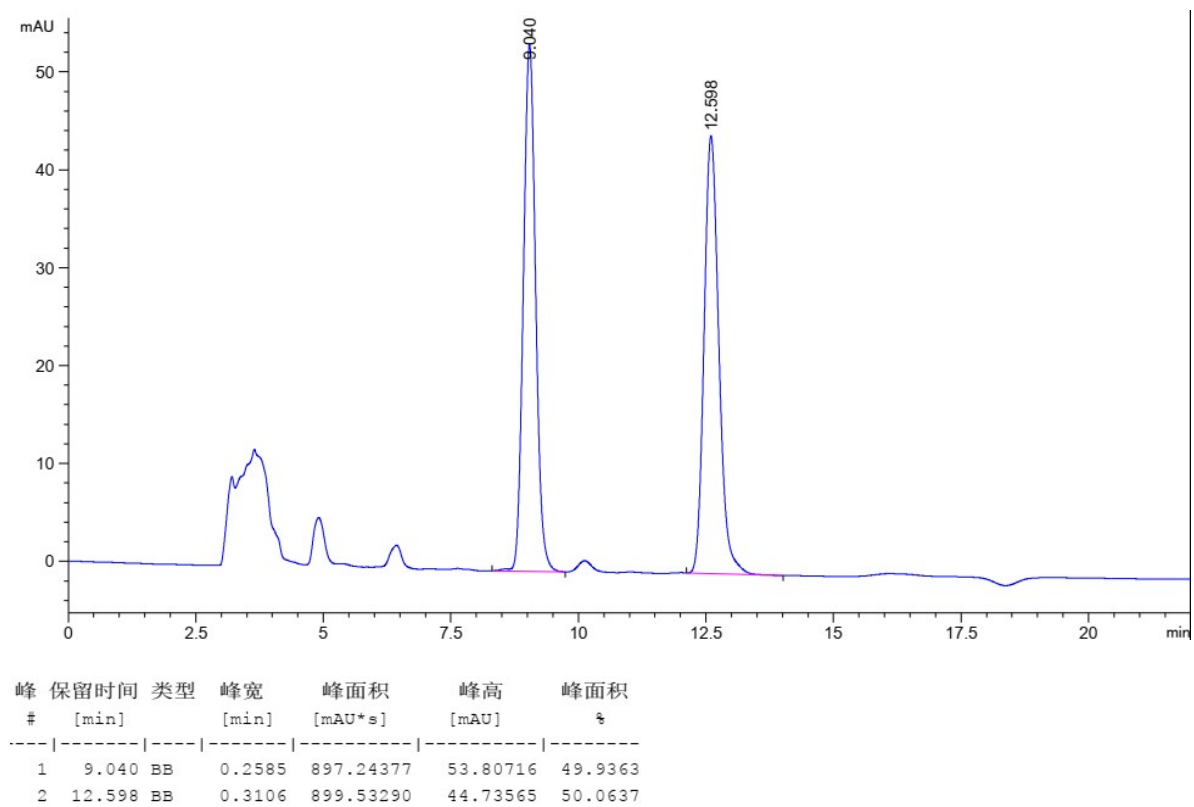



*ent*-**4ac** (by using *R*-CSB cat.): ChiralPak AD-H, *n*-hex/*i*-PrOH = 80:20, 1.0 mL/min, 230 nm,  $t_R(\text{major}) = 12.578$  min,  $t_R(\text{minor}) = 9.064$  min, 95.1% *ee*.

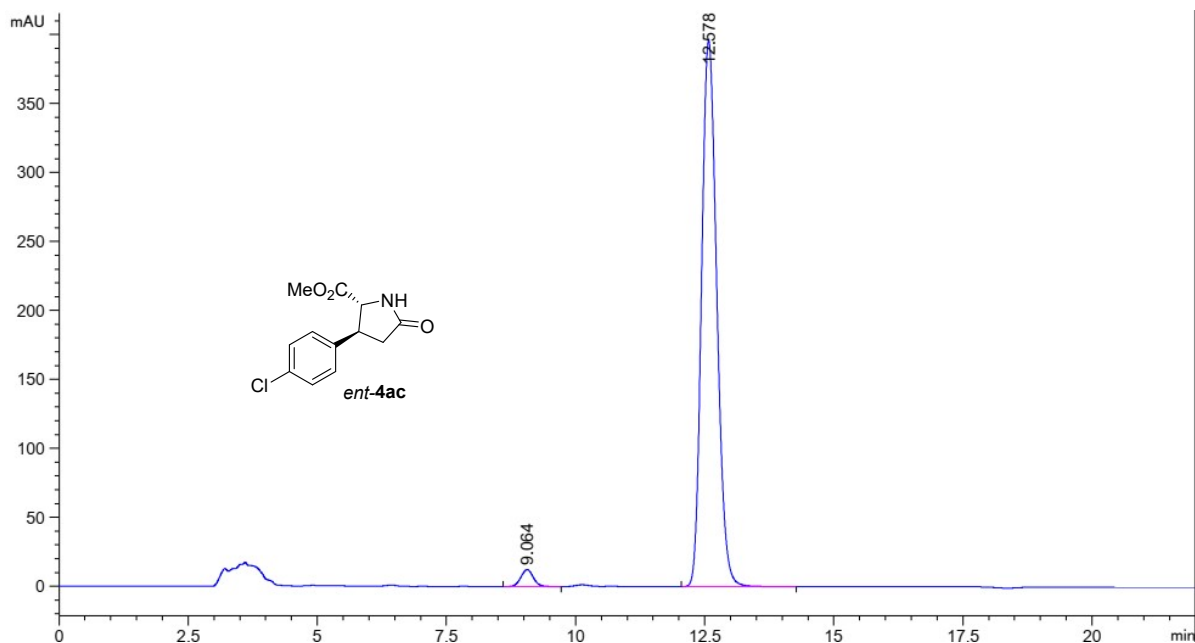

| 峰 # | 保留时间 [min] | 类型 | 峰宽 [min] | 峰面积 [mAU*s] | 峰高 [mAU]  | 峰面积 %   |
|-----|------------|----|----------|-------------|-----------|---------|
| 1   | 9.064      | BB | 0.2577   | 204.56171   | 12.31980  | 2.4666  |
| 2   | 12.578     | BB | 0.3202   | 8088.60303  | 396.22943 | 97.5334 |

S112

*rac*-**4bc**: ChiralPak AD-H, *n*-hex/*i*-PrOH = 90:10, 1.0 mL/min, 230 nm,  $t_R = 13.503$  and 21.290 min.

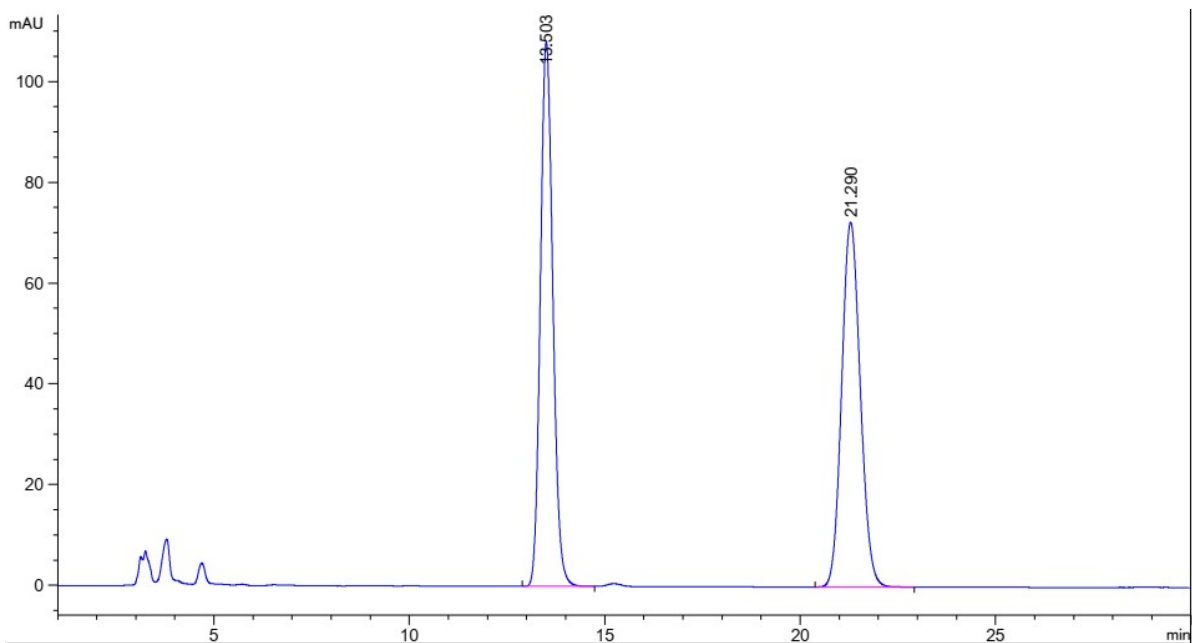

| 峰 # | 保留时间 [min] | 类型 | 峰宽 [min] | 峰面积 [mAU*s] | 峰高 [mAU]  | 峰面积 %   |
|-----|------------|----|----------|-------------|-----------|---------|
| 1   | 13.503     | BB | 0.3438   | 2398.82495  | 108.12263 | 50.0126 |
| 2   | 21.290     | BB | 0.5153   | 2397.61426  | 72.41576  | 49.9874 |

**enan-4bc**: ChiralPak AD-H, *n*-hex/*i*-PrOH = 90:10, 1.0 mL/min, 230 nm,  $t_R(\text{major}) = 13.567$  min,  $t_R(\text{minor}) = 21.331$  min, 96.2% *ee*.

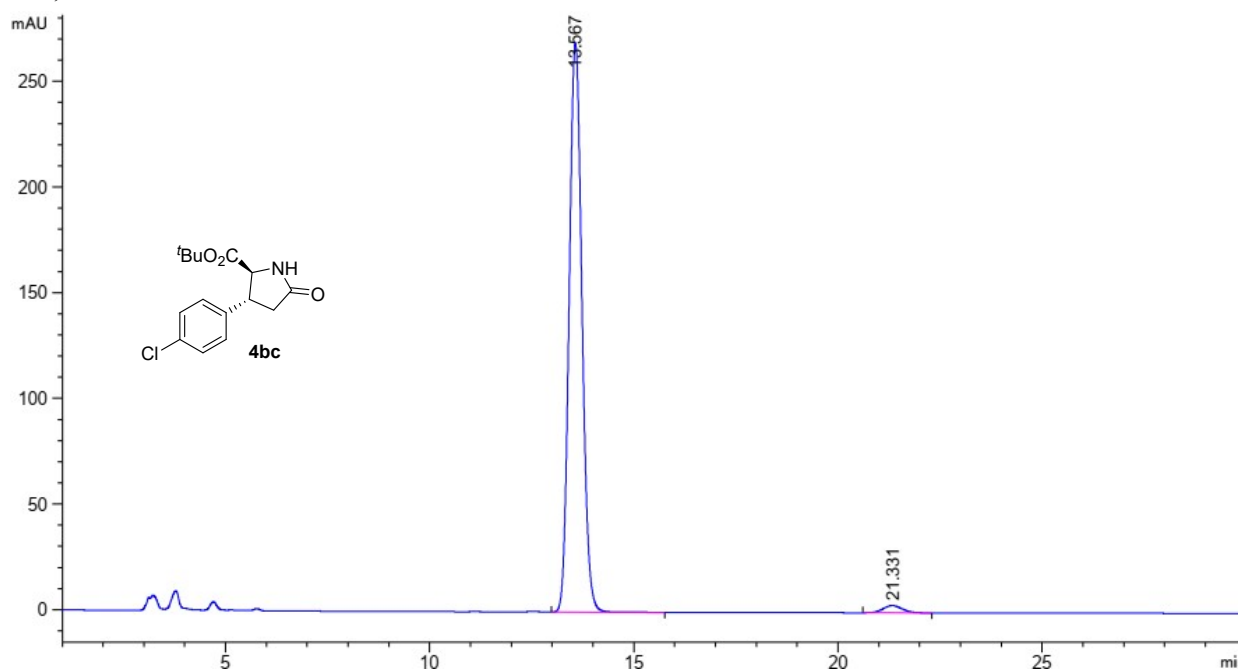

| 峰 # | 保留时间 [min] | 类型 | 峰宽 [min] | 峰面积 [mAU*s] | 峰高 [mAU]  | 峰面积 %   |
|-----|------------|----|----------|-------------|-----------|---------|
| 1   | 13.567     | BB | 0.33399  | 5859.35010  | 269.26233 | 98.1228 |
| 2   | 21.331     | BB | 0.4975   | 112.09694   | 3.43681   | 1.8772  |

S113

**rac-4ad**: ChiralPak AD-H, *n*-hex/*i*-PrOH = 90:10, 1.0 mL/min, 230 nm,  $t_R = 12.189$  and 20.507 min.

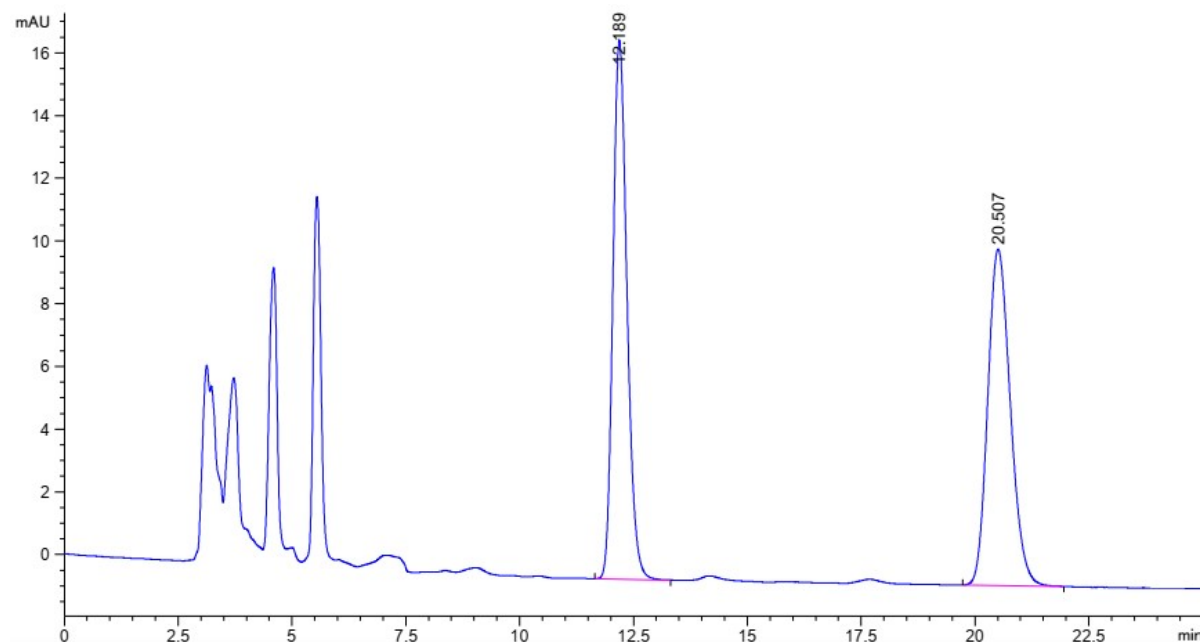

| 峰 # | 保留时间 [min] | 类型 | 峰宽 [min] | 峰面积 [mAU*s] | 峰高 [mAU] | 峰面积 %   |
|-----|------------|----|----------|-------------|----------|---------|
| 1   | 12.189     | BB | 0.3323   | 368.69989   | 17.18773 | 49.9789 |
| 2   | 20.507     | BB | 0.5294   | 369.01190   | 10.72428 | 50.0211 |

*enan-4ad*: ChiralPak AD-H, *n*-hex/*i*-PrOH = 90:10, 1.0 mL/min, 230 nm,  $t_R(\text{major}) = 12.691$  min,  $t_R(\text{minor}) = 21.193$  min, 97.4% *ee*.

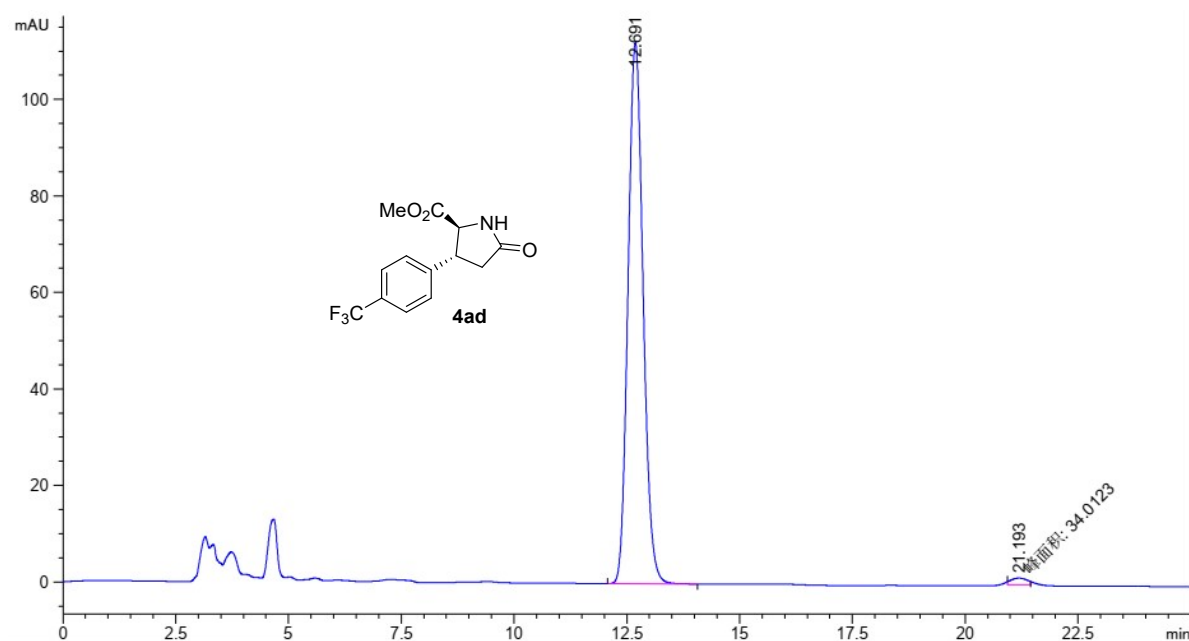

| 峰 # | 保留时间 [min] | 类型 | 峰宽 [min] | 峰面积 [mAU*s] | 峰高 [mAU]  | 峰面积 %   |
|-----|------------|----|----------|-------------|-----------|---------|
| 1   | 12.691     | BB | 0.3623   | 2607.47803  | 112.11224 | 98.7124 |
| 2   | 21.193     | MM | 0.4095   | 34.01228    | 1.38419   | 1.2876  |

S114

*rac-4ae*: ChiralPak AD-H, *n*-hex/*i*-PrOH = 90:10, 1.0 mL/min, 230 nm,  $t_R = 16.825$  and 21.095 min.

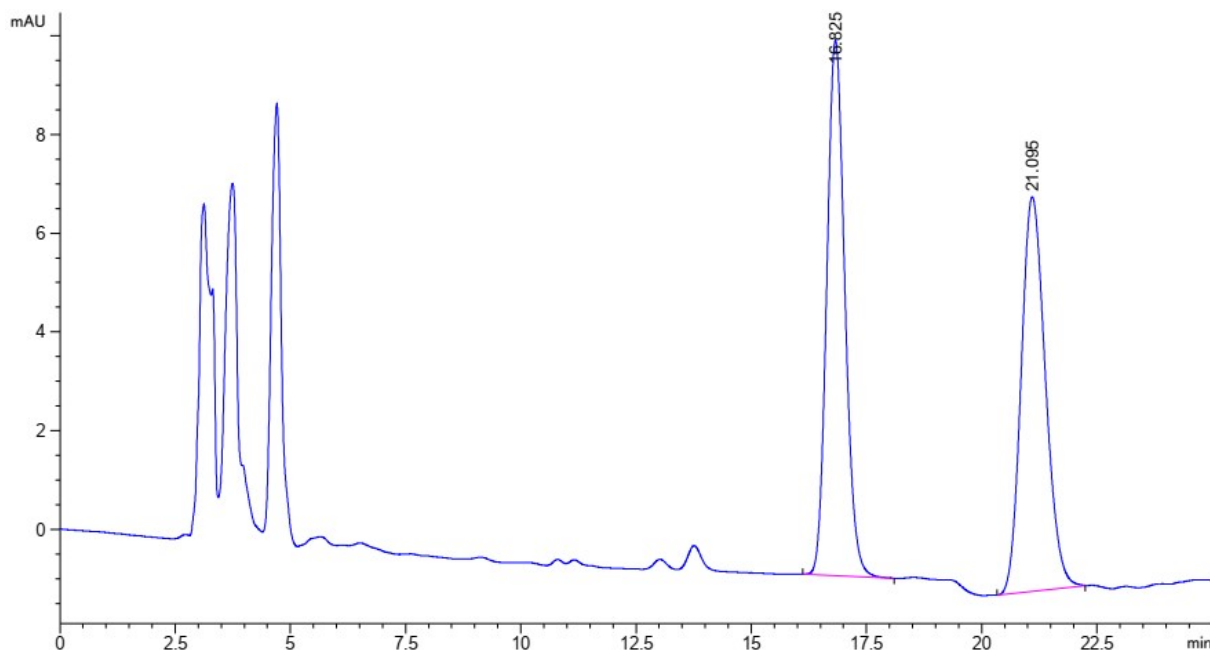

| 峰 # | 保留时间 [min] | 类型 | 峰宽 [min] | 峰面积 [mAU*s] | 峰高 [mAU] | 峰面积 %   |
|-----|------------|----|----------|-------------|----------|---------|
| 1   | 16.825     | BB | 0.4228   | 294.54974   | 10.84710 | 50.2610 |
| 2   | 21.095     | BB | 0.5607   | 291.49072   | 7.98931  | 49.7390 |

*enan-4ae*: ChiralPak AD-H, *n*-hex/*i*-PrOH = 90:10, 1.0 mL/min, 230 nm,  $t_R = 17.222$  and 21.366 min, 96.2% *ee*.

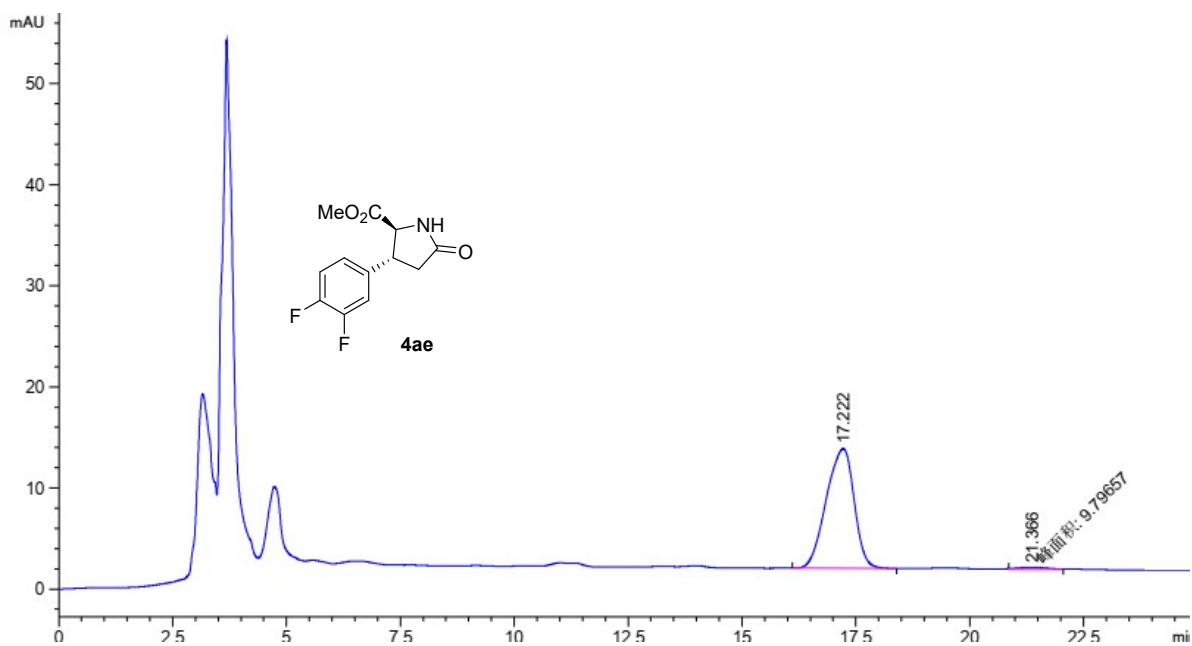

| 峰 # | 保留时间 [min] | 类型 | 峰宽 [min] | 峰面积 [mAU*s] | 峰高 [mAU]   | 峰面积 %   |
|-----|------------|----|----------|-------------|------------|---------|
| 1   | 17.222     | BB | 0.6840   | 503.33582   | 11.83975   | 98.0908 |
| 2   | 21.366     | MM | 0.7621   | 9.79657     | 2.14259e-1 | 1.9092  |

S115

*rac*-**4af**: ChiralPak AD-H, *n*-hex/*i*-PrOH = 90:10, 1.0 mL/min, 230 nm,  $t_R = 17.146$  and 22.972 min.

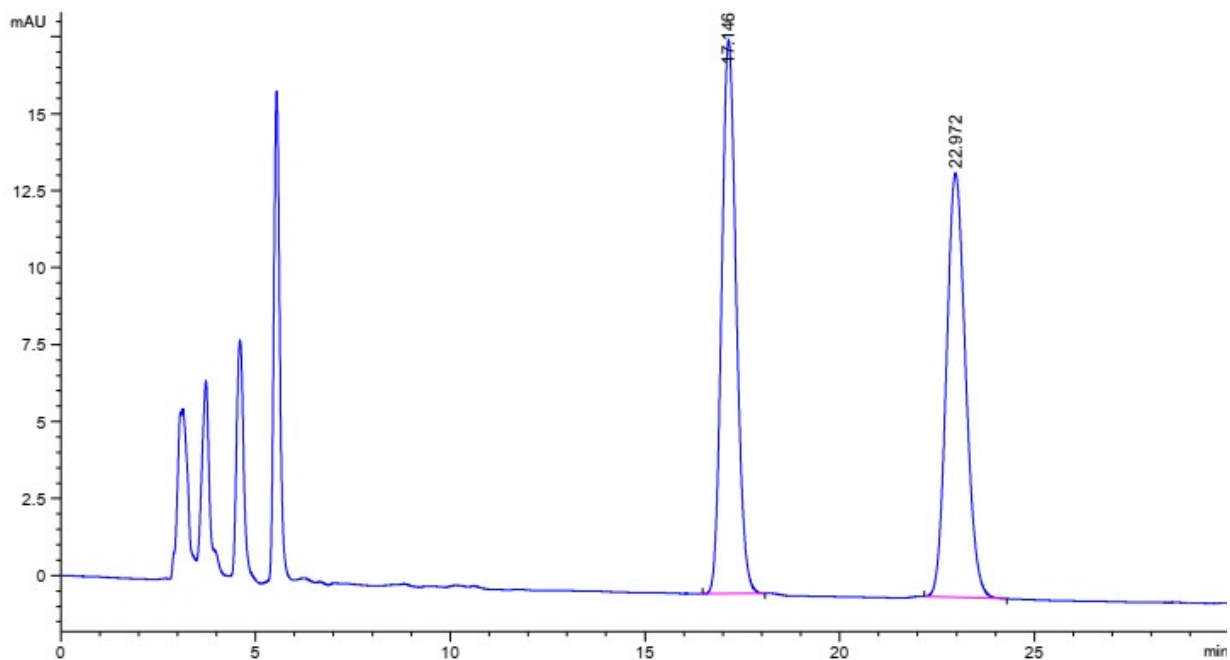

| 峰 # | 保留时间 [min] | 类型 | 峰宽 [min] | 峰面积 [mAU*s] | 峰高 [mAU] | 峰面积 %   |
|-----|------------|----|----------|-------------|----------|---------|
| 1   | 17.146     | BB | 0.4031   | 467.28745   | 17.98620 | 49.9150 |
| 2   | 22.972     | BB | 0.5302   | 468.87970   | 13.77116 | 50.0850 |

**enan-4af**: ChiralPak AD-H, *n*-hex/*i*-PrOH = 90:10, 1.0 mL/min, 230 nm,  $t_R = 17.278$  and 23.051 min, 96.7% *ee*.

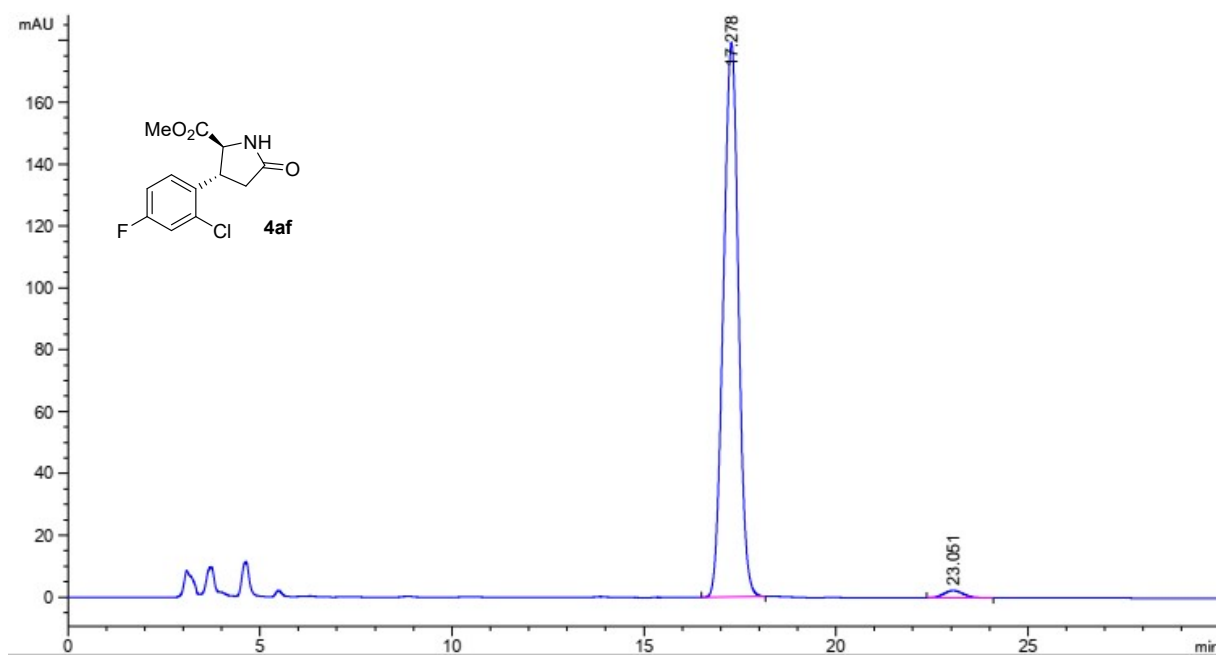

| 峰 # | 保留时间 [min] | 类型 | 峰宽 [min] | 峰面积 [mAU*s] | 峰高 [mAU]  | 峰面积 %   |
|-----|------------|----|----------|-------------|-----------|---------|
| 1   | 17.278     | BB | 0.4245   | 4864.03809  | 179.28975 | 98.3405 |
| 2   | 23.051     | BB | 0.5243   | 82.08263    | 2.35685   | 1.6595  |

S116

**rac-4ah**: ChiralPak AD-H, *n*-hex/*i*-PrOH = 90:10, 1.0 mL/min, 230 nm,  $t_R = 16.142$  and 20.504 min.

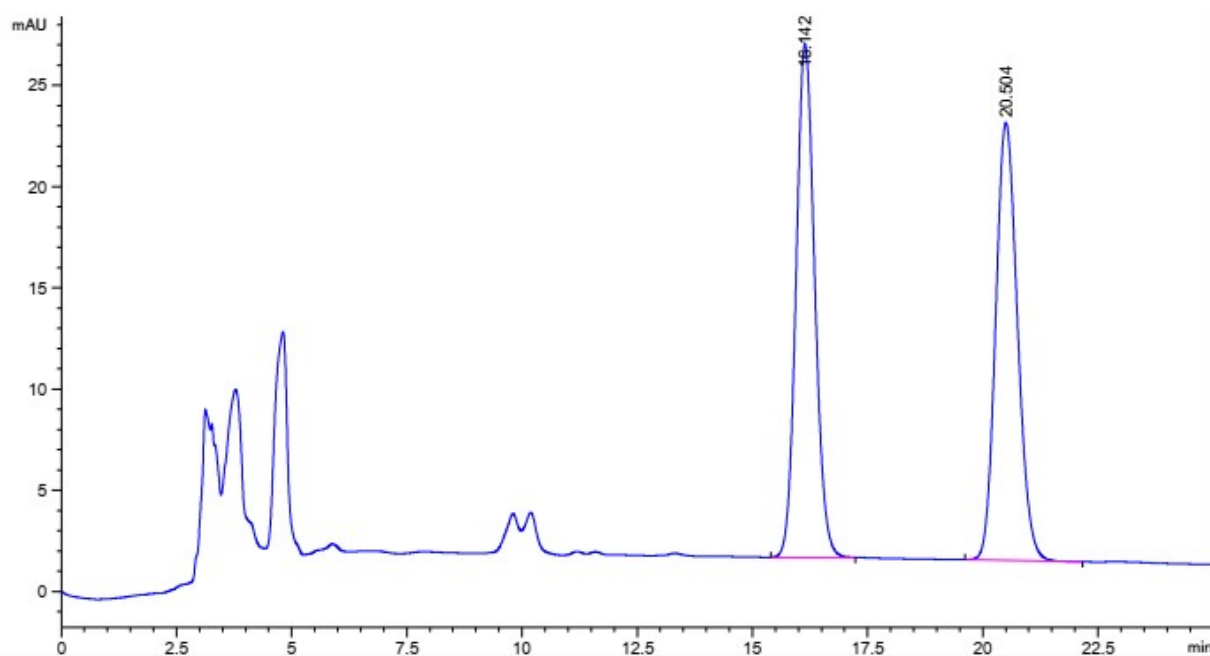

| 峰 # | 保留时间 [min] | 类型 | 峰宽 [min] | 峰面积 [mAU*s] | 峰高 [mAU] | 峰面积 %   |
|-----|------------|----|----------|-------------|----------|---------|
| 1   | 16.142     | BB | 0.4345   | 711.88556   | 25.36188 | 50.0059 |
| 2   | 20.504     | BB | 0.5110   | 711.71667   | 21.62458 | 49.9941 |

**enan-4ah**: ChiralPak AD-H, *n*-hex/*i*-PrOH = 90:10, 1.0 mL/min, 230 nm,  $t_R$  = 15.964 and 20.338 min, 98.4% *ee*.

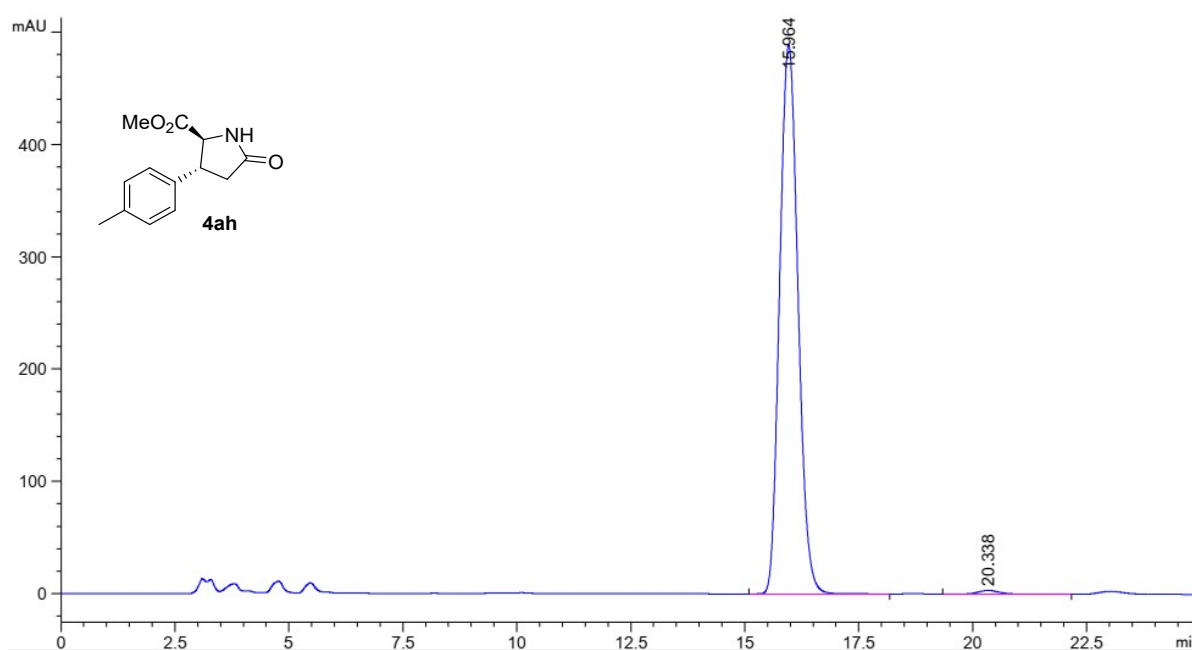

| 峰 # | 保留时间 [min] | 类型 | 峰宽 [min] | 峰面积 [mAU*s] | 峰高 [mAU]  | 峰面积 %   |
|-----|------------|----|----------|-------------|-----------|---------|
| 1   | 15.964     | BB | 0.4432   | 1.36714e4   | 489.01108 | 99.2089 |
| 2   | 20.338     | BB | 0.5016   | 109.01885   | 3.29001   | 0.7911  |

S117

**rac-4ai**: ChiralPak AD-H, *n*-hex/*i*-PrOH = 90:10, 1.0 mL/min, 230 nm,  $t_R$  = 20.396 and 27.397 min.

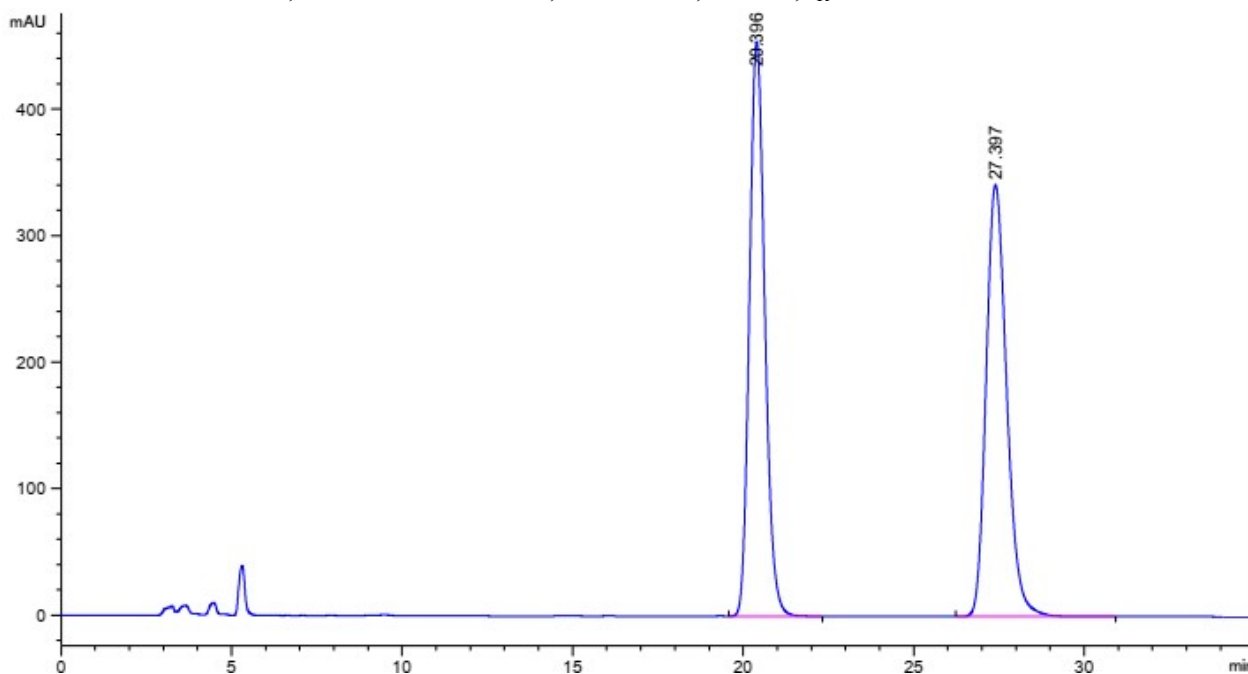

| 峰 # | 保留时间 [min] | 类型 | 峰宽 [min] | 峰面积 [mAU*s] | 峰高 [mAU]  | 峰面积 %   |
|-----|------------|----|----------|-------------|-----------|---------|
| 1   | 20.396     | BB | 0.4865   | 1.42298e4   | 454.20392 | 49.9528 |
| 2   | 27.397     | BB | 0.6484   | 1.42566e4   | 341.28345 | 50.0472 |

enan-**4ai**: ChiralPak AD-H, *n*-hex/*i*-PrOH = 90:10, 1.0 mL/min, 230 nm,  $t_R$  = 22.536 and 30.339 min, 99.2% *ee*.

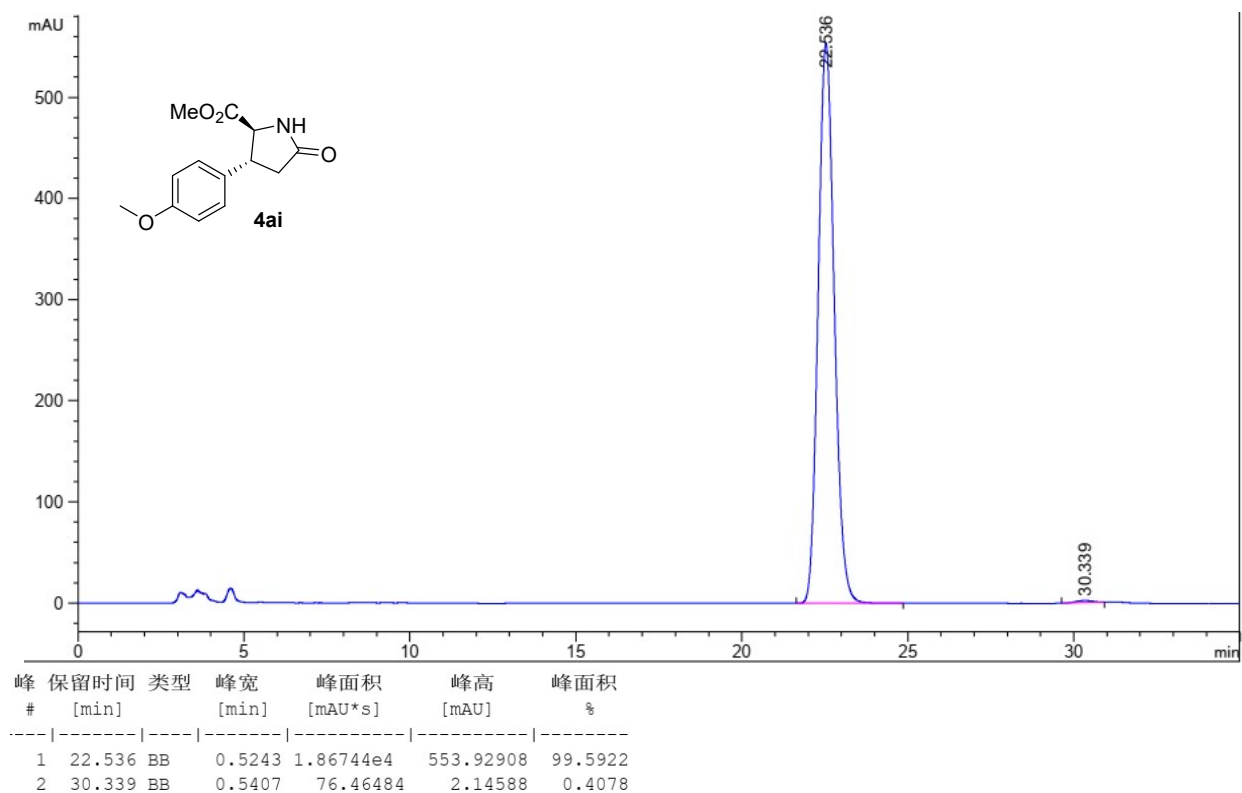

S118

## 8. References

- [1] T. Ooi, M. Kameda, K. Maruoka, *J. Am. Chem. Soc.* 1999, **121**, 6519-6520.
- [2] K. Itoh, S. Kanemasa, *J. Am. Chem. Soc.* 2002, **124**, 13394-13395.
- [3] J. S. Bandar, A. Barthelme, A.Y. Mazori, T. H. Lambert, *Chem. Sci.* 2015, **6**, 1537-1547.
- [4] Y-J. Bai, M-L. Cheng, X-H. Zheng, S-Y. Zhang, P-A. Wang, *Chem Asian J.* 2022, **17**, e202200131.
